# Supplementary material for: Regioselective synthesis of N-containing polycyclic compounds via radical annulation cyclization of 1,7-dienes with aldehydes
Source: Royal Society of Chemistry journal article supplement (doi:10.1039/d4cc00964a), 2024-01-01

## Supporting Information

# Regioselective Synthesis of *N*-Containing Polycyclic Compounds *via* Radical Annulation Cyclization of 1,7-Dienes with Aldehydes

Jia-Li Sui,<sup>a</sup> Long-Jin Zhong,<sup>\*a</sup> Bi-Quan Xiong,<sup>a</sup> Ke-Wen Tang,<sup>a</sup> Yu Liu<sup>\*a</sup>

<sup>a</sup> Department of Chemistry and Chemical Engineering, Hunan Institute of Science and Technology, Yueyang 414006, China

zlj1511@hnu.edu.cn; lyxtmj\_613@163.com

### List of Contents

|                                                       |          |
|-------------------------------------------------------|----------|
| 1. General Information                                | S1       |
| 2. Experimental Section                               | S1-S24   |
| 2.1 General Procedure for the Synthesis of Substrates | S1       |
| 2.2 Table S1. Optimization of Reaction Conditions     | S2-S3    |
| 2.3 Typical Experimental Procedure                    | S3-S4    |
| 2.4 GC-MS Analysis                                    | S4-S25   |
| 3. Characterization Data for All Products             | S26-S44  |
| 4. Reference                                          | S44      |
| 5. X-Ray Crystallographic Data                        | S45      |
| 6. Spectra                                            | S46-S139 |

## 1. General Information

Unless otherwise stated, all commercial reagents were used as received. aminobenzene (BK, 99%), benzaldehyde (Innochem, >98%) and phenylethynyl (Innochem, >98%) were used without further treatment. All reagents and solvents were commercially available and used without any further purification unless specified. All solvents were dried and distilled according to standard procedures. Flash column chromatography was performed using silica gel (0.25mm, 300-400 mesh). Analytical thin-layer chromatography was performed using glass plates pre-coated with 0.25mm 300-400 mesh silica gel impregnated with a fluorescent indicator (254 nm). All reactions were carried out with magnetic stirring and in dried glassware. Nuclear magnetic resonance (NMR) spectra are recorded in parts per million from internal tetramethylsilane on the  $\delta$  scale.  $^1\text{H}$  NMR,  $^{19}\text{F}$  NMR and  $^{13}\text{C}$  NMR spectra were recorded in  $\text{CDCl}_3$  on a Bruker DRX-400 spectrometer operating at 400 MHz, 376 MHz and 100 MHz, respectively. All chemical shift values are quoted in ppm and coupling constants quoted in Hz. The solvent peak was used as a reference value, for  $^1\text{H}$  NMR: TMS = 0.00 ppm, for  $^{13}\text{C}$  NMR:  $\text{CDCl}_3$  = 77.00 ppm. The following abbreviations were used to explain multiplicities: s = singlet, d = doublet, dd = doublet of doublet, t = triplet, td = triplet of doublet, q = quartet, m = multiplet, and br = broad. High-resolution mass spectra (HRMS) were obtained on an Agilent mass spectrometer using ESI-TOF (electrospray ionization-time of flight).

## 2. Experiment Section

### 2.1 General Procedure for the Synthesis of Substrates

All *N*-methyl-*N*-(2-(1-phenylvinyl)phenyl)methacrylamide **1**<sup>[1]</sup> were synthesized according to the known methods and all aldehydes **2** were purchased from Energy Chemical.

## 2.2 Table S1. Optimization of Reaction Conditions<sup>a</sup>

Initially, we chose *N*-methyl-*N*-(2-(1-phenylvinyl)phenyl)methacrylamide (1a) and *p*-methoxybenzaldehyde (2a) as model substrates to explore the optimum reaction conditions (Table 1). As expected, the desired *N*-containing polycyclic product 3aa was isolated in 74% yield when the 1a (0.2 mmol) reacted with 2a (0.3 mmol, 1.5 equiv) in the presence of 3 equiv TBHP (*tert*-Butyl hydroperoxide, 70% solution in water) and DCE (2 mL) at 80 °C under an argon atmosphere for 12 h (entry 1). We found that the oxidant and an argon atmosphere played a key role in this transformation, and the reaction did not occur in the absence of oxidant or under an oxygen atmosphere (entries 2-3). Inspired by these results, a series of other oxidants, including DTBP (*di-tert*-Butyl peroxide), TBPB (*tert*-Butyl peroxybenzoate), *m*-CPBA (*m*-Chloroperbenzoic acid), K<sub>2</sub>S<sub>2</sub>O<sub>8</sub>, Oxone and PhI(OAc)<sub>2</sub>, were investigated (entries 4-9). The result shows that TBHP was most efficient oxidant. As changing the amount of TBHP, the yield of product 3aa declined (entries 10-11). Next, we further explored the effect of reaction solvents. This oxidative radical annulation reaction could also be conducted in acetone, and afforded slightly lower yield than DCE (entry 12). Surprisingly, other solvents, including DMSO, THF, 1,4-dioxane, CH<sub>3</sub>CN and toluene, were not compatible with this reaction (entries 13-17). Notably, the temperature had an influence in the current reaction, convert the reaction temperature of 60 °C or 100 °C resulted in the decline of reaction yields (entries 18 and 19). Additionally, the yield of 3aa could not be increased obviously when the reaction time was extended to 24 h (entry 20). It is noteworthy that conducting the reaction with 1 mmol scale of 1,7-dienes 1a still achieved a moderate yield (entry 21).

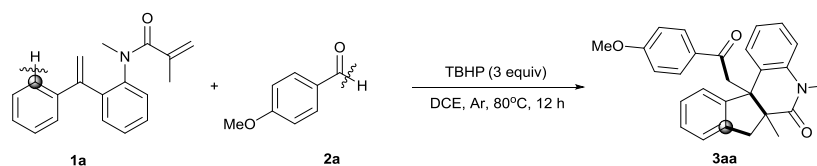

| Entry          | Variation from the standard conditions | Isolated yield (%) |
|----------------|----------------------------------------|--------------------|
| 1              | none                                   | 74                 |
| 2 <sup>b</sup> | air                                    | 0                  |
| 3 <sup>b</sup> | without TBHP                           | 0                  |
| 4              | DTBP instead of TBHP                   | 65%                |
| 5              | TBPB instead of TBHP                   | 50%                |

|                 |                                                              |       |
|-----------------|--------------------------------------------------------------|-------|
| 6               | <i>m</i> -CPBA instead of TBHP                               | 28%   |
| 7 <sup>b</sup>  | K <sub>2</sub> S <sub>2</sub> O <sub>8</sub> instead of TBHP | 0     |
| 8 <sup>b</sup>  | oxone instead of TBHP                                        | 0     |
| 9 <sup>b</sup>  | PhI(OAc) <sub>2</sub> instead of TBHP                        | trace |
| 10 <sup>c</sup> | none                                                         | 55%   |
| 11 <sup>d</sup> | none                                                         | 68%   |
| 12              | Acetone instead of DCE                                       | 65%   |
| 13 <sup>b</sup> | DMSO instead of DCE                                          | 0     |
| 14 <sup>b</sup> | THF instead of DCE                                           | 0     |
| 15 <sup>b</sup> | 1,4-dioxane instead of DCE                                   | 0     |
| 16 <sup>b</sup> | CH <sub>3</sub> CN instead of DCE                            | trace |
| 17 <sup>b</sup> | toluene instead of DCE                                       | trace |
| 18              | at 60 °C (oil bath)                                          | 54%   |
| 19              | at 100 °C (oil bath)                                         | 70%   |
| 20              | 24 h                                                         | 75%   |
| 21 <sup>e</sup> | none                                                         | 63%   |

<sup>a</sup> Reaction conditions: **1a** (0.2 mmol), **2a** (0.3 mmol, 1.5 equiv), TBHP (0.6 mmol, 3 equiv) and solvent (2 mL) at 80 °C under an argon atmosphere for 12 h. <sup>b</sup> The most of substrate **1a** was recovered. <sup>c</sup> TBHP (2 equiv) instead of TBHP (3 equiv). <sup>d</sup> TBHP(4 equiv) instead of TBHP(3 equiv). <sup>e</sup> 1 mmol scale reaction.

## 2.3 Typical Experimental Procedure

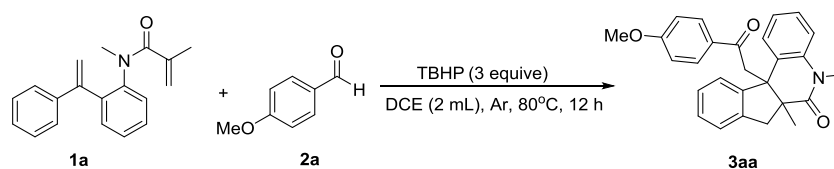

To a Schlenk tube were added *N*-methyl-*N*-(2-(1-phenylvinyl)phenyl)methacrylamide **1a** (0.2 mmol), *p*-methoxybenzaldehyde **2a** (0.3 mmol, 1.5 equiv), TBHP (0.6 mmol, 3 equiv) and DCE (2 mL). Then the tube was stirred at 80 °C in Ar atmosphere for the indicated time until complete



consumption of starting material as monitored by TLC analysis. The residue was purified by silica gel flash column chromatography (petroleum ether/ethyl acetate = 10 : 1) to afford the desired products. A scaled-up experiment conducted in the presence of **1a** (1 g, 3.6 mmol), **2a** (0.74 g, 1.5 equiv), TBHP (0.97 g, 3 equiv), and DCE (30 mL) at 80 °C for 24 h under an argon atmosphere. Until complete consumption of the starting material was observed by TLC and/or GC-MS analysis, the reaction mixture removal of the solvent, the crude product was purified by column chromatography (petroleum ether/ethyl acetate, 10 : 1) to provide the desired product **3aa** (0.93 g) in 63% yield.

## 2.4 Control Experiments

### 2.4.1 GC-MS Analysis of Raw Reaction Mixture by Using BHT as Radical

#### Inhibitor

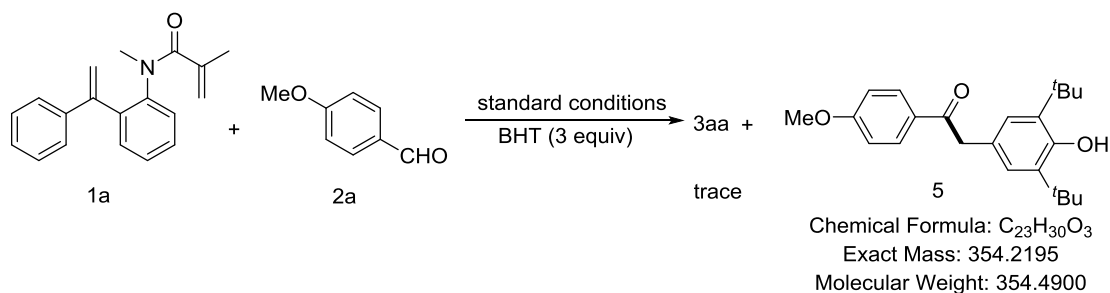

## Spectra of GC-MS

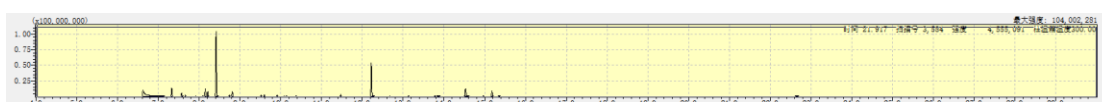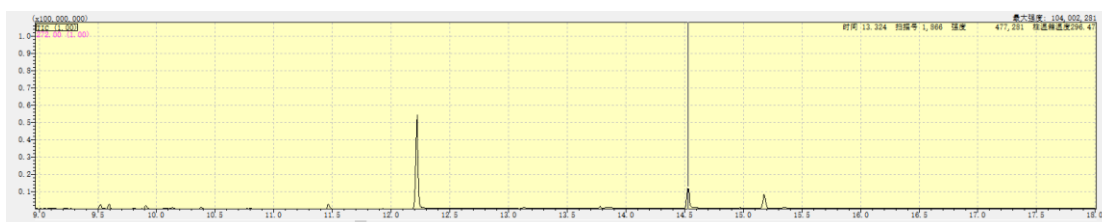

### MS Spectra of the peak at 14.530 min

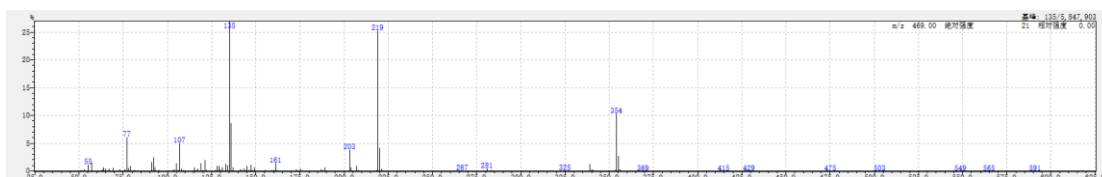

[MS Spectrum]

# of Peaks 551

Raw Spectrum 14.530 (scan : 2107)

Background No Background Spectrum

Base Peak m/z 135.05 (Inten : 5,847,903)

Event# 1

| m/z Absolute Intensity |        |      | Relative Intensity |          |      |        |          |        |
|------------------------|--------|------|--------------------|----------|------|--------|----------|--------|
| 50.00                  | 6026   | 0.10 | 84.00              | 1095     | 0.02 | 117.10 | 31329    | 0.54   |
| 51.00                  | 12350  | 0.21 | 85.10              | 1601     | 0.03 | 118.10 | 7930     | 0.14   |
| 52.05                  | 3690   | 0.06 | 86.10              | 452      | 0.01 | 119.10 | 84138    | 1.44   |
| 53.00                  | 22674  | 0.39 | 87.05              | 1561     | 0.03 | 120.10 | 14446    | 0.25   |
| 54.05                  | 2143   | 0.04 | 88.05              | 1667     | 0.03 | 121.10 | 121857   | 2.08   |
| 55.05                  | 71668  | 1.23 | 89.05              | 7096     | 0.12 | 122.10 | 11854    | 0.20   |
| 56.05                  | 8073   | 0.14 | 90.05              | 3032     | 0.05 | 123.10 | 8081     | 0.14   |
| 57.05                  | 91681  | 1.57 | 91.05              | 99640    | 1.70 | 124.15 | 11590.02 |        |
| 58.00                  | 4684   | 0.08 | 92.00              | 151089   | 2.58 | 125.05 | 1547     | 0.03   |
| 59.05                  | 4296   | 0.07 | 93.05              | 38946    | 0.67 | 126.05 | 2457     | 0.04   |
| 60.05                  | 494    | 0.01 | 94.10              | 6865     | 0.12 | 127.05 | 16976    | 0.29   |
| 61.05                  | 998    | 0.02 | 95.05              | 11392    | 0.19 | 128.10 | 54530    | 0.93   |
| 62.00                  | 1862   | 0.03 | 96.05              | 7492     | 0.13 | 129.10 | 56834    | 0.97   |
| 63.00                  | 17793  | 0.30 | 96.90              | 4142     | 0.07 | 130.10 | 21087    | 0.36   |
| 64.00                  | 43564  | 0.74 | 97.90              | 11670.02 |      | 131.10 | 41617    | 0.71   |
| 65.00                  | 24865  | 0.43 | 98.90              | 11740.02 |      | 132.10 | 10281    | 0.18   |
| 66.00                  | 4414   | 0.08 | 99.85              | 355      | 0.01 | 133.10 | 79198    | 1.35   |
| 67.00                  | 25974  | 0.44 | 100.15             | 352      | 0.01 | 134.15 | 60989    | 1.04   |
| 68.00                  | 2540   | 0.04 | 101.05             | 2081     | 0.04 | 135.05 | 5847903  | 100.00 |
| 69.00                  | 35276  | 0.60 | 102.05             | 4756     | 0.08 | 136.05 | 509883   | 8.72   |
| 70.05                  | 2392   | 0.04 | 103.05             | 17581    | 0.30 | 137.05 | 45628    | 0.78   |
| 71.15                  | 2529   | 0.04 | 104.05             | 19118    | 0.33 | 138.10 | 3217     | 0.06   |
| 72.05                  | 1051   | 0.02 | 105.05             | 82817    | 1.42 | 139.10 | 2502     | 0.04   |
| 73.05                  | 24142  | 0.41 | 106.05             | 16080    | 0.27 | 140.05 | 1779     | 0.03   |
| 74.05                  | 3712   | 0.06 | 107.05             | 294210   | 5.03 | 141.10 | 22695    | 0.39   |
| 75.05                  | 6034   | 0.10 | 108.05             | 27256    | 0.47 | 142.10 | 11785    | 0.20   |
| 76.05                  | 20513  | 0.35 | 109.10             | 10970    | 0.19 | 143.10 | 26420    | 0.45   |
| 77.00                  | 360516 | 6.16 | 110.05             | 1257     | 0.02 | 144.10 | 10734    | 0.18   |
| 78.00                  | 35058  | 0.60 | 111.05             | 2107     | 0.04 | 145.10 | 53457    | 0.91   |
| 79.05                  | 57637  | 0.99 | 111.85             | 1049     | 0.02 | 146.10 | 14524    | 0.25   |
| 80.05                  | 8078   | 0.14 | 113.05             | 1204     | 0.02 | 147.10 | 69287    | 1.18   |
| 81.05                  | 17630  | 0.30 | 114.15             | 1399     | 0.02 | 148.10 | 11383    | 0.19   |
| 82.05                  | 2709   | 0.05 | 115.05             | 42392    | 0.72 | 149.05 | 40506    | 0.69   |
| 83.05                  | 9962   | 0.17 | 116.05             | 16121    | 0.28 | 150.05 | 4282     | 0.07   |

|        |          |      |        |          |       |        |          |      |
|--------|----------|------|--------|----------|-------|--------|----------|------|
| 151.05 | 2328     | 0.04 | 195.05 | 3084     | 0.05  | 239.00 | 3897     | 0.07 |
| 152.05 | 5347     | 0.09 | 196.00 | 1247     | 0.02  | 240.05 | 1241     | 0.02 |
| 153.05 | 8131     | 0.14 | 197.05 | 1274     | 0.02  | 240.95 | 1432     | 0.02 |
| 154.05 | 4394     | 0.08 | 198.05 | 489      | 0.01  | 242.15 | 510      | 0.01 |
| 155.05 | 11199    | 0.19 | 199.00 | 1442     | 0.02  | 243.10 | 1804     | 0.03 |
| 156.10 | 8852     | 0.15 | 200.10 | 486      | 0.01  | 244.00 | 684      | 0.01 |
| 157.05 | 9210     | 0.16 | 201.10 | 1670     | 0.03  | 245.15 | 536      | 0.01 |
| 158.10 | 5201     | 0.09 | 202.15 | 4826     | 0.08  | 246.05 | 383      | 0.01 |
| 159.10 | 16886    | 0.29 | 203.10 | 225878   | 3.86  | 247.05 | 992      | 0.02 |
| 160.10 | 10862    | 0.19 | 204.05 | 42368    | 0.72  | 247.95 | 1358     | 0.02 |
| 161.10 | 87783    | 1.50 | 205.10 | 9289     | 0.16  | 248.95 | 3214     | 0.05 |
| 162.10 | 17050    | 0.29 | 206.05 | 2547     | 0.04  | 250.05 | 1746     | 0.03 |
| 163.10 | 9782     | 0.17 | 207.00 | 53641    | 0.92  | 250.95 | 2767     | 0.05 |
| 164.15 | 1865     | 0.03 | 208.00 | 12686    | 0.22  | 252.05 | 1673     | 0.03 |
| 165.10 | 61100.10 |      | 209.00 | 9590     | 0.16  | 253.05 | 3239     | 0.06 |
| 166.05 | 2365     | 0.04 | 210.05 | 2282     | 0.04  | 254.05 | 659      | 0.01 |
| 167.05 | 1920     | 0.03 | 211.05 | 1495     | 0.03  | 255.05 | 3006     | 0.05 |
| 168.10 | 1047     | 0.02 | 211.95 | 878      | 0.02  | 256.05 | 617      | 0.01 |
| 169.10 | 3078     | 0.05 | 213.00 | 1929     | 0.03  | 256.90 | 321      | 0.01 |
| 170.10 | 9146     | 0.16 | 213.95 | 305      | 0.01  | 257.90 | 350      | 0.01 |
| 171.05 | 7210     | 0.12 | 215.00 | 1913     | 0.03  | 259.05 | 400      | 0.01 |
| 172.15 | 2473     | 0.04 | 216.05 | 1057     | 0.02  | 260.10 | 546      | 0.01 |
| 173.05 | 17838    | 0.31 | 217.10 | 7559     | 0.13  | 261.05 | 358      | 0.01 |
| 174.15 | 6057     | 0.10 | 218.15 | 11625    | 0.20  | 262.05 | 737      | 0.01 |
| 175.10 | 28657    | 0.49 | 219.15 | 1480697  | 25.32 | 263.05 | 880      | 0.02 |
| 176.10 | 5428     | 0.09 | 220.10 | 248609   | 4.25  | 264.05 | 1056     | 0.02 |
| 177.05 | 3755     | 0.06 | 221.10 | 27620    | 0.47  | 265.00 | 5186     | 0.09 |
| 178.05 | 4922     | 0.08 | 222.10 | 3703     | 0.06  | 266.00 | 1641     | 0.03 |
| 179.05 | 4071     | 0.07 | 223.00 | 2327     | 0.04  | 267.00 | 5910     | 0.10 |
| 180.05 | 676      | 0.01 | 224.05 | 1550     | 0.03  | 268.05 | 1785     | 0.03 |
| 181.05 | 2562     | 0.04 | 225.05 | 1450     | 0.02  | 269.10 | 2087     | 0.04 |
| 182.10 | 745      | 0.01 | 226.05 | 11800.02 |       | 270.20 | 769      | 0.01 |
| 183.05 | 11320.02 |      | 227.05 | 3582     | 0.06  | 271.20 | 367      | 0.01 |
| 184.15 | 951      | 0.02 | 228.05 | 885      | 0.02  | 272.20 | 169      | 0.00 |
| 185.10 | 5754     | 0.10 | 229.05 | 851      | 0.01  | 273.20 | 164      | 0.00 |
| 186.15 | 1797     | 0.03 | 230.10 | 340      | 0.01  | 274.20 | 226      | 0.00 |
| 187.05 | 19928    | 0.34 | 231.10 | 1238     | 0.02  | 275.20 | 329      | 0.01 |
| 188.10 | 15582    | 0.27 | 232.05 | 1240     | 0.02  | 276.00 | 286      | 0.00 |
| 189.10 | 44706    | 0.76 | 233.10 | 3159     | 0.05  | 277.05 | 572      | 0.01 |
| 190.05 | 7052     | 0.12 | 234.05 | 1072     | 0.02  | 278.05 | 371      | 0.01 |
| 191.05 | 10225    | 0.17 | 235.00 | 2153     | 0.04  | 279.05 | 1903     | 0.03 |
| 192.00 | 31110.05 |      | 236.05 | 1426     | 0.02  | 280.05 | 1745     | 0.03 |
| 193.00 | 5724     | 0.10 | 237.10 | 1903     | 0.03  | 281.00 | 25153    | 0.43 |
| 194.00 | 2558     | 0.04 | 238.05 | 1055     | 0.02  | 282.05 | 71180.12 |      |

|        |       |      |        |      |      |               |               |              |
|--------|-------|------|--------|------|------|---------------|---------------|--------------|
| 283.05 | 12016 | 0.21 | 309.15 | 1367 | 0.02 | 334.80        | 27            | 0.00         |
| 284.05 | 3028  | 0.05 | 310.15 | 524  | 0.01 | 336.15        | 283           | 0.00         |
| 284.95 | 636   | 0.01 | 311.05 | 1805 | 0.03 | 337.15        | 1222          | 0.02         |
| 286.00 | 150   | 0.00 | 312.15 | 694  | 0.01 | 338.15        | 9248          | 0.16         |
| 287.00 | 98    | 0.00 | 313.00 | 308  | 0.01 | 339.15        | 79736         | 1.36         |
| 288.00 | 142   | 0.00 | 314.00 | 591  | 0.01 | 340.15        | 20982         | 0.36         |
| 289.00 | 142   | 0.00 | 315.00 | 174  | 0.00 | 341.00        | 11473         | 0.20         |
| 290.00 | 103   | 0.00 | 316.00 | 33   | 0.00 | 342.05        | 3023          | 0.05         |
| 291.00 | 174   | 0.00 | 317.00 | 57   | 0.00 | 343.00        | 2036          | 0.03         |
| 292.10 | 110   | 0.00 | 318.00 | 38   | 0.00 | 343.95        | 638           | 0.01         |
| 293.10 | 1294  | 0.02 | 319.00 | 137  | 0.00 | 344.90        | 159           | 0.00         |
| 294.15 | 577   | 0.01 | 320.00 | 151  | 0.00 | 345.90        | 76            | 0.00         |
| 295.05 | 4853  | 0.08 | 321.00 | 646  | 0.01 | 346.90        | 70            | 0.00         |
| 296.05 | 2337  | 0.04 | 322.15 | 543  | 0.01 | 347.90        | 34            | 0.00         |
| 297.10 | 7263  | 0.12 | 323.15 | 3530 | 0.06 | 348.90        | 81            | 0.00         |
| 298.10 | 2268  | 0.04 | 324.05 | 1389 | 0.02 | 349.90        | 50            | 0.00         |
| 299.10 | 655   | 0.01 | 325.00 | 4186 | 0.07 | 350.90        | 156           | 0.00         |
| 300.10 | 254   | 0.00 | 325.95 | 1096 | 0.02 | 352.25        | 705           | 0.01         |
| 301.10 | 114   | 0.00 | 326.95 | 2827 | 0.05 | <b>353.25</b> | <b>12624</b>  | <b>0.22</b>  |
| 302.10 | 79    | 0.00 | 328.00 | 1006 | 0.02 | <b>354.15</b> | <b>605597</b> | <b>10.36</b> |
| 303.10 | 81    | 0.00 | 328.85 | 643  | 0.01 | <b>355.15</b> | <b>160370</b> | <b>2.74</b>  |
| 304.10 | 209   | 0.00 | 329.80 | 71   | 0.00 | 356.10        | 24650         | 0.42         |
| 305.10 | 169   | 0.00 | 330.80 | 90   | 0.00 | 357.15        | 4088          | 0.07         |
| 305.90 | 326   | 0.01 | 331.80 | 62   | 0.00 | 358.15        | 383           | 0.01         |
| 306.95 | 607   | 0.01 | 332.80 | 84   | 0.00 | 359.10        | 711           | 0.01         |
| 308.10 | 252   | 0.00 | 333.80 | 24   | 0.00 | 360.10        | 161           | 0.00         |

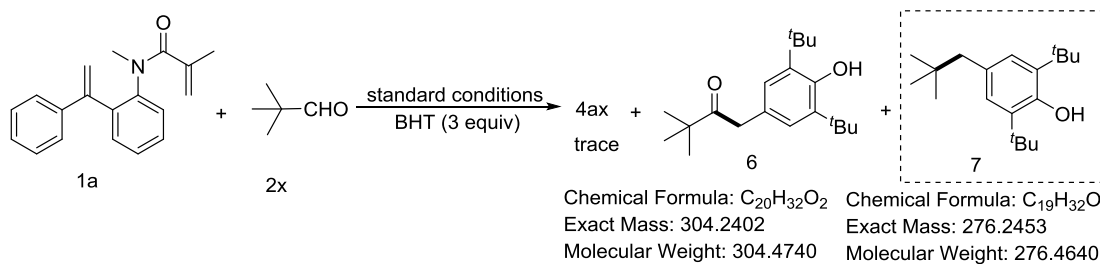

## Spectra of GC-MS

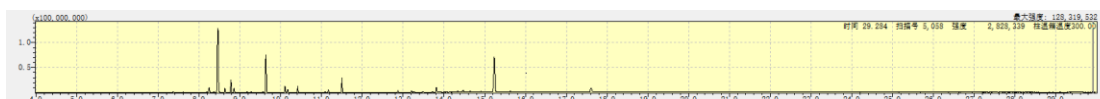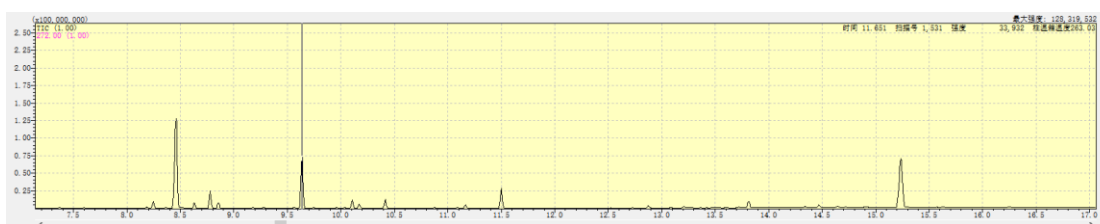

## MS Spectra of the peak at 9.635 min

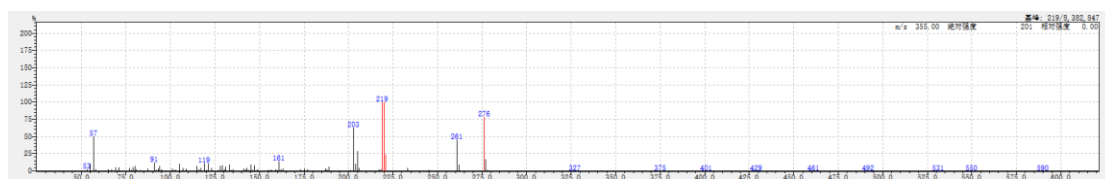

[MS Spectrum]

# of Peaks 476

Raw Spectrum 9.635 (scan : 1128)

Background No Background Spectrum

Base Peak m/z 219.05 (Inten : 8,382,847)

Event# 1

| m/z    | Absolute Intensity | Relative Intensity |
|--------|--------------------|--------------------|
| 50.05  | 9424               | 0.11               |
| 51.05  | 70743              | 0.84               |
| 52.05  | 32754              | 0.39               |
| 53.05  | 205325             | 2.45               |
| 54.15  | 23765              | 0.28               |
| 55.05  | 871115             | 10.39              |
| 56.15  | 116066             | 1.38               |
| 57.05  | 4282275            | 51.08              |
| 58.05  | 233755             | 2.79               |
| 59.05  | 28038              | 0.33               |
| 60.00  | 3004               | 0.04               |
| 61.00  | 388                | 0.00               |
| 62.05  | 2982               | 0.04               |
| 63.05  | 30243              | 0.36               |
| 64.05  | 91184              | 1.09               |
| 65.00  | 222935             | 2.66               |
| 66.00  | 55214              | 0.66               |
| 67.05  | 249775             | 2.98               |
| 68.05  | 18066              | 0.22               |
| 69.05  | 473817             | 5.65               |
| 70.10  | 50241              | 0.60               |
| 71.05  | 482077             | 5.75               |
| 72.05  | 69380              | 0.83               |
| 73.05  | 109736             | 1.31               |
| 73.95  | 14020              | 0.17               |
| 75.00  | 11151              | 0.13               |
| 76.05  | 34131              | 0.41               |
| 77.05  | 419269             | 5.00               |
| 78.05  | 129136             | 1.54               |
| 79.05  | 454240             | 5.42               |
| 80.05  | 653266             | 7.79               |
| 81.00  | 208386             | 2.49               |
| 82.05  | 24009              | 0.29               |
| 83.05  | 138897             | 1.66               |
| 84.00  | 19006              | 0.23               |
| 85.05  | 31326              | 0.37               |
| 86.05  | 81898              | 0.98               |
| 87.05  | 297400             | 3.55               |
| 87.95  | 28529              | 0.34               |
| 89.00  | 38463              | 0.46               |
| 90.05  | 17707              | 0.21               |
| 91.05  | 1055231            | 12.59              |
| 92.05  | 122537             | 1.46               |
| 93.05  | 364346             | 4.35               |
| 94.05  | 644805             | 7.69               |
| 95.00  | 215751             | 2.57               |
| 96.00  | 15169              | 0.18               |
| 97.05  | 29566              | 0.35               |
| 98.10  | 3902               | 0.05               |
| 99.05  | 2875               | 0.03               |
| 100.05 | 21000              | 0.25               |
| 101.05 | 305639             | 3.65               |
| 102.00 | 140265             | 1.67               |
| 103.00 | 167618             | 2.00               |
| 104.15 | 69442              | 0.83               |
| 105.05 | 913903             | 10.90              |
| 106.05 | 116995             | 1.40               |
| 107.05 | 376344             | 4.49               |
| 108.15 | 64501              | 0.77               |
| 109.05 | 347603             | 4.15               |
| 110.05 | 22563              | 0.27               |
| 111.05 | 10439              | 0.12               |
| 112.05 | 963                | 0.01               |
| 113.05 | 2594               | 0.03               |
| 114.05 | 12317              | 0.15               |
| 115.05 | 624697             | 7.45               |
| 116.05 | 219718             | 2.62               |
| 117.05 | 426318             | 5.09               |
| 118.15 | 79987              | 0.95               |
| 119.05 | 979461             | 11.68              |
| 120.10 | 155078             | 1.85               |
| 121.10 | 957993             | 11.43              |
| 122.10 | 112321             | 1.34               |
| 123.10 | 447716             | 5.34               |
| 124.05 | 34619              | 0.41               |
| 125.10 | 3316               | 0.04               |
| 126.15 | 9258               | 0.11               |
| 127.05 | 179260             | 2.14               |
| 128.05 | 662116             | 7.90               |
| 129.05 | 696161             | 8.30               |
| 130.10 | 264386             | 3.15               |

|        |         |       |        |         |       |        |         |        |
|--------|---------|-------|--------|---------|-------|--------|---------|--------|
| 131.05 | 555786  | 6.63  | 175.00 | 367178  | 4.38  | 219.05 | 8382847 | 100.00 |
| 132.05 | 121362  | 1.45  | 176.05 | 66515   | 0.79  | 220.00 | 8382478 | 100.00 |
| 133.05 | 818396  | 9.76  | 177.00 | 248722  | 2.97  | 220.95 | 2037338 | 24.30  |
| 134.05 | 163648  | 1.95  | 178.00 | 38722   | 0.46  | 222.05 | 68114   | 0.81   |
| 135.05 | 239598  | 2.86  | 179.00 | 8026    | 0.10  | 223.00 | 3924    | 0.05   |
| 136.10 | 30092   | 0.36  | 179.95 | 5539    | 0.07  | 224.00 | 169     | 0.00   |
| 137.05 | 16629   | 0.20  | 181.00 | 11218   | 0.13  | 225.00 | 111     | 0.00   |
| 138.05 | 1963    | 0.02  | 182.00 | 8574    | 0.10  | 226.00 | 110     | 0.00   |
| 139.00 | 17098   | 0.20  | 183.00 | 18015   | 0.21  | 227.05 | 1379    | 0.02   |
| 140.05 | 11222   | 0.13  | 184.05 | 9799    | 0.12  | 228.00 | 575     | 0.01   |
| 141.00 | 319310  | 3.81  | 185.00 | 74852   | 0.89  | 229.00 | 9644    | 0.12   |
| 142.05 | 244739  | 2.92  | 186.05 | 24170   | 0.29  | 230.05 | 2480    | 0.03   |
| 143.05 | 371530  | 4.43  | 187.00 | 334410  | 3.99  | 231.00 | 48841   | 0.58   |
| 144.05 | 150281  | 1.79  | 188.00 | 237486  | 2.83  | 232.05 | 10276   | 0.12   |
| 145.05 | 776814  | 9.27  | 189.00 | 546188  | 6.52  | 233.05 | 375856  | 4.48   |
| 146.05 | 184628  | 2.20  | 190.00 | 83550   | 1.00  | 234.05 | 65969   | 0.79   |
| 147.05 | 696611  | 8.31  | 191.00 | 40338   | 0.48  | 235.00 | 6679    | 0.08   |
| 148.05 | 119367  | 1.42  | 191.95 | 5704    | 0.07  | 236.05 | 682     | 0.01   |
| 149.05 | 272667  | 3.25  | 192.90 | 2031    | 0.02  | 237.00 | 756     | 0.01   |
| 150.05 | 31269   | 0.37  | 194.00 | 777     | 0.01  | 238.00 | 154     | 0.00   |
| 151.00 | 12537   | 0.15  | 195.00 | 6657    | 0.08  | 239.00 | 190     | 0.00   |
| 152.00 | 44847   | 0.53  | 196.00 | 4180    | 0.05  | 240.00 | 46      | 0.00   |
| 153.00 | 106407  | 1.27  | 197.00 | 7626    | 0.09  | 240.90 | 569     | 0.01   |
| 154.00 | 61377   | 0.73  | 198.00 | 2948    | 0.04  | 242.00 | 180     | 0.00   |
| 155.00 | 148777  | 1.77  | 199.00 | 9414    | 0.11  | 243.00 | 11174   | 0.13   |
| 156.05 | 135879  | 1.62  | 200.05 | 4761    | 0.06  | 244.05 | 3629    | 0.04   |
| 157.00 | 196356  | 2.34  | 201.00 | 142006  | 1.69  | 245.00 | 157388  | 1.88   |
| 158.00 | 76303   | 0.91  | 202.05 | 66688   | 0.80  | 246.00 | 31058   | 0.37   |
| 159.00 | 277865  | 3.31  | 203.00 | 5300180 | 63.23 | 247.05 | 24853   | 0.30   |
| 160.05 | 152675  | 1.82  | 204.00 | 922318  | 11.00 | 248.00 | 5740    | 0.07   |
| 161.00 | 1192383 | 14.22 | 205.00 | 2450465 | 29.23 | 248.90 | 770     | 0.01   |
| 162.00 | 242750  | 2.90  | 206.00 | 377583  | 4.50  | 249.70 | 378     | 0.00   |
| 163.00 | 327785  | 3.91  | 207.00 | 36513   | 0.44  | 251.00 | 239     | 0.00   |
| 164.00 | 61783   | 0.74  | 207.95 | 2649    | 0.03  | 251.95 | 1288    | 0.02   |
| 165.00 | 41412   | 0.49  | 209.00 | 945     | 0.01  | 253.00 | 249     | 0.00   |
| 166.00 | 15916   | 0.19  | 209.90 | 529     | 0.01  | 254.00 | 159     | 0.00   |
| 167.00 | 50503   | 0.60  | 210.90 | 898     | 0.01  | 255.00 | 284     | 0.00   |
| 168.00 | 18892   | 0.23  | 212.05 | 709     | 0.01  | 256.00 | 170     | 0.00   |
| 169.00 | 40273   | 0.48  | 213.00 | 2588    | 0.03  | 257.00 | 926     | 0.01   |
| 170.00 | 117538  | 1.40  | 214.05 | 1235    | 0.01  | 258.05 | 793     | 0.01   |
| 171.00 | 113738  | 1.36  | 215.05 | 25231   | 0.30  | 259.05 | 32235   | 0.38   |
| 172.05 | 46957   | 0.56  | 216.05 | 7437    | 0.09  | 260.15 | 55414   | 0.66   |
| 173.00 | 237977  | 2.84  | 217.00 | 272982  | 3.26  | 261.05 | 3807735 | 45.42  |
| 174.00 | 87260   | 1.04  | 218.05 | 247552  | 2.95  | 262.05 | 778063  | 9.28   |

|        |       |      |               |                |              |        |       |      |
|--------|-------|------|---------------|----------------|--------------|--------|-------|------|
| 263.05 | 81333 | 0.97 | 271.10        | 94             | 0.00         | 279.05 | 14190 | 0.17 |
| 264.00 | 6498  | 0.08 | 272.10        | 310            | 0.00         | 280.05 | 815   | 0.01 |
| 265.05 | 623   | 0.01 | 273.15        | 425            | 0.01         | 280.95 | 914   | 0.01 |
| 266.00 | 137   | 0.00 | 274.10        | 9406           | 0.11         | 282.00 | 260   | 0.00 |
| 267.05 | 552   | 0.01 | <b>275.15</b> | <b>72374</b>   | <b>0.86</b>  | 283.00 | 185   | 0.00 |
| 268.10 | 105   | 0.00 | <b>276.10</b> | <b>662028</b>  | <b>78.97</b> | 284.00 | 81    | 0.00 |
| 269.10 | 135   | 0.00 | <b>277.10</b> | <b>1453306</b> | <b>17.34</b> |        |       |      |
| 270.10 | 279   | 0.00 | 278.05        | 164956         | 1.97         |        |       |      |

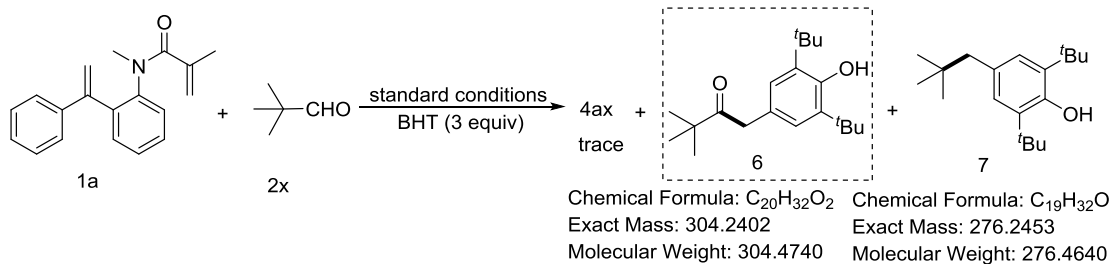

### Spectra of GC-MS

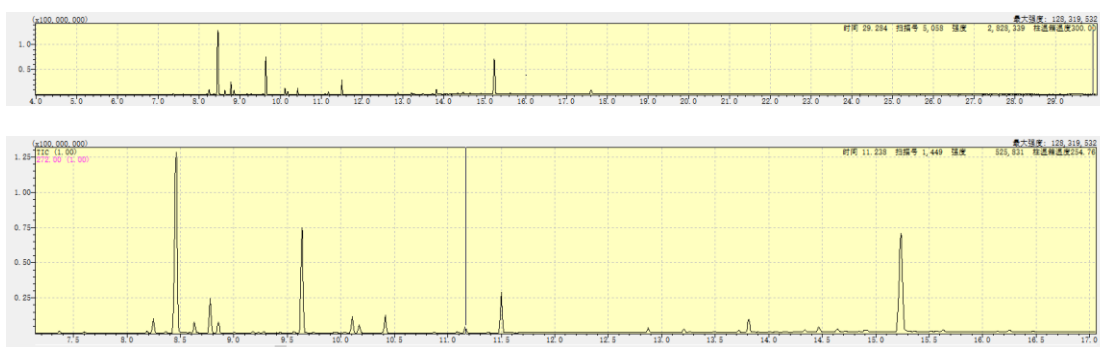

### MS Spectra of the peak at 11.160 min

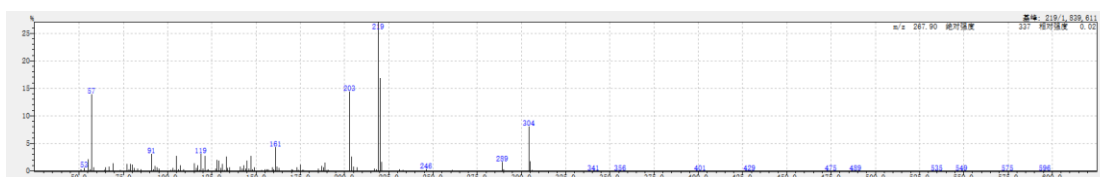

### [MS Spectrum]

# of Peaks 477

Raw Spectrum 11.160 (scan : 1433)

Background No Background Spectrum

Base Peak m/z 219.05 (Inten : 1,755,819)

Event# 1

m/z Absolute Intensity    Relative Intensity

|       |        |       |        |          |      |        |       |      |
|-------|--------|-------|--------|----------|------|--------|-------|------|
| 50.00 | 951    | 0.05  | 94.05  | 10439    | 0.59 | 138.00 | 113   | 0.01 |
| 51.00 | 3961   | 0.23  | 95.05  | 5798     | 0.33 | 139.05 | 925   | 0.05 |
| 52.00 | 2039   | 0.12  | 96.05  | 2028     | 0.12 | 140.05 | 322   | 0.02 |
| 53.00 | 8327   | 0.47  | 97.00  | 1404     | 0.08 | 141.05 | 12111 | 0.69 |
| 54.05 | 802    | 0.05  | 98.00  | 140      | 0.01 | 142.05 | 8295  | 0.47 |
| 55.05 | 31044  | 1.77  | 99.10  | 417      | 0.02 | 143.00 | 18884 | 1.08 |
| 56.15 | 5750   | 0.33  | 100.10 | 406      | 0.02 | 144.05 | 6969  | 0.40 |
| 57.05 | 197158 | 11.23 | 101.05 | 738      | 0.04 | 145.05 | 30374 | 1.73 |
| 58.05 | 11161  | 0.64  | 102.05 | 3716     | 0.21 | 146.00 | 7988  | 0.45 |
| 59.05 | 1816   | 0.10  | 103.05 | 9283     | 0.53 | 147.05 | 43726 | 2.49 |
| 60.10 | 135    | 0.01  | 104.10 | 3034     | 0.17 | 148.10 | 6540  | 0.37 |
| 61.10 | 471    | 0.03  | 105.05 | 43262    | 2.46 | 149.05 | 10506 | 0.60 |
| 62.10 | 254    | 0.01  | 106.05 | 6275     | 0.36 | 150.10 | 1074  | 0.06 |
| 63.10 | 1521   | 0.09  | 107.10 | 15790    | 0.90 | 151.05 | 756   | 0.04 |
| 64.05 | 2602   | 0.15  | 108.05 | 1838     | 0.10 | 152.05 | 1639  | 0.09 |
| 65.05 | 9304   | 0.53  | 109.05 | 5472     | 0.31 | 153.00 | 3689  | 0.21 |
| 66.05 | 2089   | 0.12  | 110.00 | 884      | 0.05 | 154.00 | 2022  | 0.12 |
| 67.05 | 11299  | 0.64  | 111.10 | 734      | 0.04 | 155.05 | 6166  | 0.35 |
| 68.10 | 990    | 0.06  | 112.10 | 97       | 0.01 | 156.00 | 6185  | 0.35 |
| 69.10 | 19569  | 1.11  | 113.10 | 490      | 0.03 | 157.00 | 6942  | 0.40 |
| 70.05 | 2050   | 0.12  | 114.05 | 403      | 0.02 | 158.05 | 2806  | 0.16 |
| 71.00 | 2634   | 0.15  | 115.05 | 24052    | 1.37 | 159.00 | 11730 | 0.67 |
| 72.05 | 1217   | 0.07  | 116.05 | 8817     | 0.50 | 160.05 | 6180  | 0.35 |
| 73.10 | 4396   | 0.25  | 117.05 | 17828    | 1.02 | 161.05 | 73270 | 4.17 |
| 74.05 | 751    | 0.04  | 118.15 | 3429     | 0.20 | 162.00 | 13230 | 0.75 |
| 75.00 | 1374   | 0.08  | 119.05 | 48301    | 2.75 | 163.05 | 8969  | 0.51 |
| 76.05 | 1081   | 0.06  | 120.10 | 7151     | 0.41 | 164.05 | 1656  | 0.09 |
| 77.05 | 19705  | 1.12  | 121.10 | 42778    | 2.44 | 164.95 | 1246  | 0.07 |
| 78.10 | 6033   | 0.34  | 122.10 | 4494     | 0.26 | 165.95 | 404   | 0.02 |
| 79.10 | 18918  | 1.08  | 123.10 | 6052     | 0.34 | 166.95 | 1054  | 0.06 |
| 80.10 | 18105  | 1.03  | 124.05 | 576      | 0.03 | 168.00 | 658   | 0.04 |
| 81.05 | 8670   | 0.49  | 125.10 | 276      | 0.02 | 169.00 | 1471  | 0.08 |
| 82.10 | 1209   | 0.07  | 126.15 | 507      | 0.03 | 170.05 | 5198  | 0.30 |
| 83.05 | 6760   | 0.39  | 127.05 | 81160.46 |      | 171.05 | 4519  | 0.26 |
| 84.05 | 825    | 0.05  | 128.05 | 31545    | 1.80 | 171.95 | 940   | 0.05 |
| 85.10 | 6806   | 0.39  | 129.05 | 30549    | 1.74 | 173.00 | 10666 | 0.61 |
| 86.05 | 1227   | 0.07  | 130.10 | 9959     | 0.57 | 174.00 | 4471  | 0.25 |
| 86.95 | 1531   | 0.09  | 131.10 | 21265    | 1.21 | 175.05 | 19845 | 1.13 |
| 88.05 | 1013   | 0.06  | 132.05 | 4700     | 0.27 | 176.00 | 3439  | 0.20 |
| 89.05 | 2314   | 0.13  | 133.10 | 43506    | 2.48 | 176.95 | 5277  | 0.30 |
| 90.15 | 683    | 0.04  | 134.05 | 9709     | 0.55 | 177.95 | 1292  | 0.07 |
| 91.05 | 44796  | 2.55  | 135.05 | 12771    | 0.73 | 178.95 | 1339  | 0.08 |
| 92.05 | 5342   | 0.30  | 136.10 | 1697     | 0.10 | 180.00 | 407   | 0.02 |
| 93.10 | 14807  | 0.84  | 137.05 | 1494     | 0.09 | 180.95 | 601   | 0.03 |



|        |         |        |        |      |      |                      |                      |                    |
|--------|---------|--------|--------|------|------|----------------------|----------------------|--------------------|
| 182.00 | 396     | 0.02   | 224.00 | 135  | 0.01 | 265.90               | 186                  | 0.01               |
| 183.00 | 692     | 0.04   | 225.00 | 241  | 0.01 | 266.90               | 11140.06             |                    |
| 184.05 | 454     | 0.03   | 226.00 | 108  | 0.01 | 267.95               | 456                  | 0.03               |
| 185.05 | 7178    | 0.41   | 227.00 | 276  | 0.02 | 268.90               | 353                  | 0.02               |
| 186.05 | 1631    | 0.09   | 228.00 | 132  | 0.01 | 269.90               | 167                  | 0.01               |
| 187.00 | 15009   | 0.85   | 229.05 | 694  | 0.04 | 271.10               | 660                  | 0.04               |
| 188.00 | 10417   | 0.59   | 229.95 | 494  | 0.03 | 272.10               | 31                   | 0.00               |
| 189.00 | 26030   | 1.48   | 231.00 | 7585 | 0.43 | 273.05               | 1837                 | 0.10               |
| 190.00 | 3977    | 0.23   | 231.95 | 1239 | 0.07 | 274.20               | 678                  | 0.04               |
| 190.95 | 3057    | 0.17   | 233.05 | 3685 | 0.21 | 275.15               | 377                  | 0.02               |
| 192.00 | 772     | 0.04   | 234.00 | 950  | 0.05 | 276.10               | 588                  | 0.03               |
| 192.95 | 3206    | 0.18   | 235.00 | 750  | 0.04 | 277.25               | 536                  | 0.03               |
| 193.90 | 615     | 0.04   | 236.00 | 695  | 0.04 | 279.20               | 42                   | 0.00               |
| 194.90 | 354     | 0.02   | 237.00 | 262  | 0.01 | 279.90               | 52                   | 0.00               |
| 195.90 | 102     | 0.01   | 238.00 | 65   | 0.00 | 280.90               | 2548                 | 0.15               |
| 197.05 | 428     | 0.02   | 239.00 | 113  | 0.01 | 282.00               | 588                  | 0.03               |
| 198.00 | 305     | 0.02   | 239.90 | 111  | 0.01 | 283.00               | 572                  | 0.03               |
| 199.10 | 718     | 0.04   | 240.95 | 690  | 0.04 | 284.00               | 70                   | 0.00               |
| 200.05 | 315     | 0.02   | 241.90 | 166  | 0.01 | 285.00               | 145                  | 0.01               |
| 200.95 | 1248    | 0.07   | 242.90 | 241  | 0.01 | 286.00               | 175                  | 0.01               |
| 202.05 | 1691    | 0.10   | 244.00 | 230  | 0.01 | 287.10               | 521                  | 0.03               |
| 203.00 | 246174  | 14.02  | 245.00 | 1732 | 0.10 | 288.15               | 486                  | 0.03               |
| 204.00 | 45522   | 2.59   | 246.05 | 6380 | 0.36 | 289.05               | 30416                | 1.73               |
| 205.05 | 16202   | 0.92   | 247.00 | 1538 | 0.09 | 290.10               | 6839                 | 0.39               |
| 205.95 | 2528    | 0.14   | 248.10 | 756  | 0.04 | 291.10               | 700                  | 0.04               |
| 206.90 | 12818   | 0.73   | 249.10 | 407  | 0.02 | 292.10               | 434                  | 0.02               |
| 207.90 | 2799    | 0.16   | 250.00 | 282  | 0.02 | 293.10               | 63                   | 0.00               |
| 208.90 | 2082    | 0.12   | 251.00 | 609  | 0.03 | 294.10               | 143                  | 0.01               |
| 209.90 | 174     | 0.01   | 251.95 | 402  | 0.02 | 295.10               | 105                  | 0.01               |
| 210.90 | 393     | 0.02   | 252.90 | 231  | 0.01 | 297.10               | 33                   | 0.00               |
| 211.90 | 74      | 0.00   | 253.90 | 3    | 0.00 | 299.10               | 29                   | 0.00               |
| 212.90 | 342     | 0.02   | 254.90 | 150  | 0.01 | 300.10               | 63                   | 0.00               |
| 213.90 | 110     | 0.01   | 255.90 | 746  | 0.04 | 301.00               | 102                  | 0.01               |
| 215.00 | 953     | 0.05   | 256.90 | 278  | 0.02 | 302.05               | 1276                 | 0.07               |
| 215.95 | 335     | 0.02   | 257.90 | 119  | 0.01 | <b>303.15</b>        | <b>943</b>           | <b>0.05</b>        |
| 217.00 | 9417    | 0.54   | 259.10 | 802  | 0.05 | <b><u>304.10</u></b> | <b><u>159734</u></b> | <b><u>9.10</u></b> |
| 218.05 | 6492    | 0.37   | 260.05 | 364  | 0.02 | <b>305.10</b>        | <b>40391</b>         | <b>2.30</b>        |
| 219.05 | 1755819 | 100.00 | 261.05 | 4509 | 0.26 | 306.10               | 5471                 | 0.31               |
| 220.05 | 299952  | 17.08  | 262.05 | 960  | 0.05 | 307.10               | 394                  | 0.02               |
| 221.00 | 33009   | 1.88   | 263.05 | 949  | 0.05 | 308.10               | 106                  | 0.01               |
| 222.05 | 2328    | 0.13   | 264.00 | 231  | 0.01 | 309.10               | 130                  | 0.01               |
| 223.00 | 380     | 0.02   | 265.00 | 463  | 0.03 | 310.10               | 52                   | 0.00               |

## 2.4.2 GC-MS Analysis of Raw Reaction Mixture by Using TMEPO as Radical Inhibitor

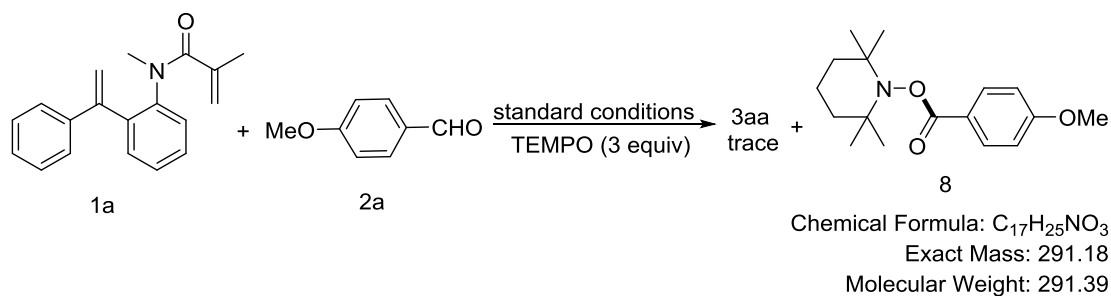

### Spectra of GC-MS

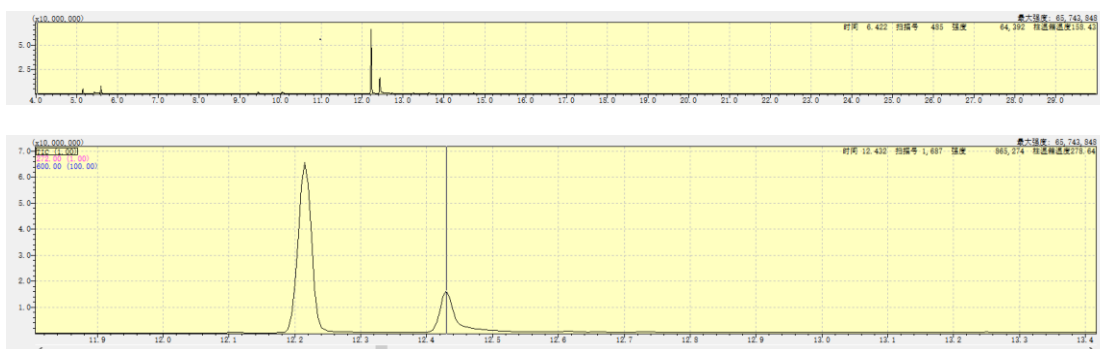

### The MS spectra of the peak at 12.430min

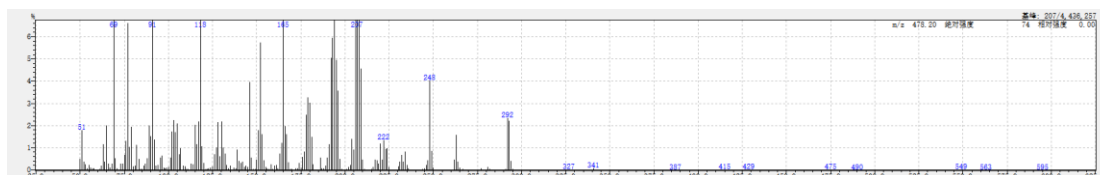

### [MS Spectrum]

# of Peaks 543

Raw Spectrum 12.430 (scan : 1687)

Background No Background Spectrum

Base Peak m/z 207.05 (Inten : 4,436,257)

Event# 1

| m/z   | Absolute Intensity | Relative Intensity |
|-------|--------------------|--------------------|
| 50.00 | 22145              | 0.50               |
| 51.00 | 79815              | 1.80               |
| 52.00 | 17870              | 0.40               |
| 53.00 | 12583              | 0.28               |
| 54.00 | 4534               | 0.10               |
| 55.00 | 10769              | 0.24               |
| 56.05 | 5871               | 0.13               |
| 57.05 | 3491               | 0.08               |
| 57.95 | 4515               | 0.10               |
| 59.00 | 1302               | 0.03               |
| 60.05 | 623                | 0.01               |
| 61.05 | 2396               | 0.05               |
| 62.00 | 9735               | 0.22               |
| 63.00 | 51641              | 1.16               |
| 64.00 | 17774              | 0.40               |

|        |          |       |        |        |       |        |          |       |
|--------|----------|-------|--------|--------|-------|--------|----------|-------|
| 65.00  | 89946    | 2.03  | 109.35 | 7395   | 0.17  | 153.05 | 72740    | 1.64  |
| 66.00  | 13914    | 0.31  | 110.35 | 2960   | 0.07  | 154.05 | 20405    | 0.46  |
| 67.00  | 5194     | 0.12  | 111.05 | 2564   | 0.06  | 155.10 | 6366     | 0.14  |
| 68.05  | 13553    | 0.31  | 112.05 | 1974   | 0.04  | 156.05 | 4056     | 0.09  |
| 69.00  | 405210   | 9.13  | 113.05 | 13413  | 0.30  | 157.10 | 2233     | 0.05  |
| 70.00  | 24666    | 0.56  | 114.10 | 11702  | 0.26  | 158.10 | 12550    | 0.28  |
| 70.95  | 3850     | 0.09  | 115.05 | 90906  | 2.05  | 159.10 | 2921     | 0.07  |
| 72.05  | 603 0.01 |       | 116.05 | 52341  | 1.18  | 160.10 | 9950     | 0.22  |
| 73.00  | 12825    | 0.29  | 117.10 | 97362  | 2.19  | 161.05 | 10418    | 0.23  |
| 74.00  | 13438    | 0.30  | 118.05 | 506802 | 11.42 | 162.15 | 4424     | 0.10  |
| 75.00  | 31070    | 0.70  | 119.10 | 48170  | 1.09  | 163.05 | 33973    | 0.77  |
| 76.00  | 58823    | 1.33  | 120.05 | 15214  | 0.34  | 164.15 | 54425    | 1.23  |
| 77.00  | 293820   | 6.62  | 121.05 | 2476   | 0.06  | 165.05 | 348180   | 7.85  |
| 78.00  | 47338    | 1.07  | 121.85 | 2454   | 0.06  | 166.05 | 88086    | 1.99  |
| 79.00  | 87098    | 1.96  | 122.85 | 3450   | 0.08  | 167.05 | 71871    | 1.62  |
| 80.05  | 8673     | 0.20  | 123.80 | 5788   | 0.13  | 168.05 | 16683    | 0.38  |
| 81.15  | 9607     | 0.22  | 125.05 | 7907   | 0.18  | 169.10 | 3255     | 0.07  |
| 82.05  | 50556    | 1.14  | 126.05 | 31520  | 0.71  | 170.05 | 2204     | 0.05  |
| 83.40  | 22735    | 0.51  | 127.10 | 45964  | 1.04  | 171.10 | 1250     | 0.03  |
| 84.35  | 2471     | 0.06  | 128.05 | 95670  | 2.16  | 172.10 | 4377     | 0.10  |
| 84.95  | 2159     | 0.05  | 129.10 | 27878  | 0.63  | 173.15 | 3842     | 0.09  |
| 86.05  | 9768     | 0.22  | 130.10 | 97572  | 2.20  | 174.05 | 14533    | 0.33  |
| 87.00  | 13150    | 0.30  | 131.15 | 45682  | 1.03  | 175.15 | 49110.11 |       |
| 88.05  | 24145    | 0.54  | 132.05 | 33390  | 0.75  | 176.05 | 26448    | 0.60  |
| 89.05  | 89528    | 2.02  | 133.00 | 11343  | 0.26  | 177.05 | 37397    | 0.84  |
| 90.05  | 68586    | 1.55  | 134.05 | 3363   | 0.08  | 178.05 | 111147   | 2.51  |
| 91.05  | 641333   | 14.46 | 135.05 | 9741   | 0.22  | 179.05 | 145319   | 3.28  |
| 92.05  | 61098    | 1.38  | 136.15 | 1783   | 0.04  | 180.05 | 134505   | 3.03  |
| 93.05  | 9539     | 0.22  | 137.05 | 5139   | 0.12  | 181.05 | 66653    | 1.50  |
| 94.10  | 11356    | 0.26  | 138.15 | 4526   | 0.10  | 182.05 | 11483    | 0.26  |
| 95.55  | 26058    | 0.59  | 139.05 | 40873  | 0.92  | 183.00 | 2002     | 0.05  |
| 96.50  | 29060    | 0.66  | 140.05 | 18205  | 0.41  | 184.05 | 1872     | 0.04  |
| 97.45  | 5046     | 0.11  | 141.05 | 14212  | 0.32  | 185.05 | 730 0.02 |       |
| 98.05  | 4629     | 0.10  | 142.05 | 17444  | 0.39  | 186.05 | 24829    | 0.56  |
| 99.05  | 5804     | 0.13  | 143.05 | 6826   | 0.15  | 186.95 | 4175     | 0.09  |
| 100.05 | 6345     | 0.14  | 144.05 | 9955   | 0.22  | 188.05 | 3547     | 0.08  |
| 101.15 | 25405    | 0.57  | 145.15 | 6951   | 0.16  | 189.05 | 9023     | 0.20  |
| 102.15 | 77186    | 1.74  | 146.05 | 176112 | 3.97  | 190.05 | 25975    | 0.59  |
| 103.05 | 99796    | 2.25  | 147.05 | 24868  | 0.56  | 191.05 | 52553    | 1.18  |
| 104.05 | 75830    | 1.71  | 148.05 | 2223   | 0.05  | 192.05 | 224881   | 5.07  |
| 105.00 | 93238    | 2.10  | 149.15 | 2453   | 0.06  | 193.05 | 265385   | 5.98  |
| 106.05 | 32718    | 0.74  | 150.05 | 21830  | 0.49  | 194.05 | 1382073  | 31.15 |
| 107.05 | 44208    | 1.00  | 151.05 | 80240  | 1.81  | 195.05 | 220224   | 4.96  |
| 108.40 | 9596     | 0.22  | 152.05 | 255593 | 5.76  | 196.05 | 159485   | 3.60  |

|        |         |        |        |          |      |               |               |             |
|--------|---------|--------|--------|----------|------|---------------|---------------|-------------|
| 197.05 | 23225   | 0.52   | 233.05 | 17961    | 0.40 | 268.90        | 609           | 0.01        |
| 198.10 | 2148    | 0.05   | 234.05 | 37932    | 0.86 | 269.90        | 193           | 0.00        |
| 199.05 | 293     | 0.01   | 235.05 | 10802    | 0.24 | 270.90        | 154           | 0.00        |
| 199.95 | 1072    | 0.02   | 236.05 | 3799     | 0.09 | 271.90        | 145           | 0.00        |
| 201.00 | 2252    | 0.05   | 237.05 | 1253     | 0.03 | 272.90        | 68            | 0.00        |
| 202.00 | 6572    | 0.15   | 238.05 | 1560     | 0.04 | 274.10        | 1550          | 0.03        |
| 203.05 | 11252   | 0.25   | 239.00 | 316      | 0.01 | 275.00        | 774           | 0.02        |
| 204.05 | 62299   | 1.40   | 240.00 | 313      | 0.01 | 276.15        | 758           | 0.02        |
| 205.15 | 42028   | 0.95   | 241.00 | 135      | 0.00 | 277.10        | 3402          | 0.08        |
| 206.15 | 509328  | 11.48  | 242.05 | 445      | 0.01 | 278.05        | 1481          | 0.03        |
| 207.05 | 4436257 | 100.00 | 242.95 | 442      | 0.01 | 279.10        | 302           | 0.01        |
| 208.05 | 1331653 | 30.02  | 244.00 | 3062     | 0.07 | 280.00        | 151           | 0.00        |
| 209.05 | 203611  | 4.59   | 245.05 | 3446     | 0.08 | 281.00        | 6788          | 0.15        |
| 210.00 | 20913   | 0.47   | 246.05 | 10428    | 0.24 | 281.95        | 2687          | 0.06        |
| 211.00 | 2287    | 0.05   | 247.05 | 19733    | 0.44 | 282.95        | 1387          | 0.03        |
| 212.00 | 428     | 0.01   | 248.05 | 178919   | 4.03 | 283.90        | 238           | 0.01        |
| 212.95 | 618     | 0.01   | 249.05 | 38507    | 0.87 | 284.90        | 114           | 0.00        |
| 214.00 | 1538    | 0.03   | 250.00 | 5329     | 0.12 | 285.90        | 22            | 0.00        |
| 215.00 | 2847    | 0.06   | 251.05 | 11360.03 |      | 286.90        | 122           | 0.00        |
| 216.05 | 6090    | 0.14   | 252.05 | 328      | 0.01 | 287.90        | 27            | 0.00        |
| 217.05 | 21404   | 0.48   | 253.00 | 634      | 0.01 | 288.90        | 54            | 0.00        |
| 218.05 | 20142   | 0.45   | 254.05 | 479      | 0.01 | <b>289.90</b> | <b>114</b>    | <b>0.00</b> |
| 219.05 | 13527   | 0.30   | 255.15 | 303      | 0.01 | <b>291.15</b> | <b>2426</b>   | <b>0.05</b> |
| 220.05 | 54122   | 1.22   | 256.05 | 563      | 0.01 | <b>292.10</b> | <b>104238</b> | <b>2.35</b> |
| 221.05 | 21912   | 0.49   | 257.15 | 523      | 0.01 | 293.10        | 98999         | 2.23        |
| 222.00 | 60857   | 1.37   | 258.10 | 916      | 0.02 | 294.05        | 18718         | 0.42        |
| 223.05 | 43307   | 0.98   | 259.05 | 821      | 0.02 | 295.10        | 3185          | 0.07        |
| 224.05 | 44764   | 1.01   | 260.05 | 1807     | 0.04 | 296.00        | 567           | 0.01        |
| 225.00 | 7174    | 0.16   | 261.15 | 1614     | 0.04 | 297.00        | 174           | 0.00        |
| 225.95 | 903     | 0.02   | 262.05 | 21128    | 0.48 | 298.00        | 76            | 0.00        |
| 227.05 | 707     | 0.02   | 263.05 | 71096    | 1.60 | 299.00        | 33            | 0.00        |
| 228.05 | 2001    | 0.05   | 264.05 | 18045    | 0.41 | 300.00        | 21            | 0.00        |
| 229.10 | 1487    | 0.03   | 265.10 | 5042     | 0.11 | 301.00        | 62            | 0.00        |
| 230.10 | 8239    | 0.19   | 266.00 | 782      | 0.02 | 302.00        | 46            | 0.00        |
| 231.05 | 17473   | 0.39   | 267.00 | 2322     | 0.05 | 303.00        | 57            | 0.00        |
| 232.05 | 30863   | 0.70   | 267.95 | 335      | 0.01 | 304.00        | 66            | 0.00        |

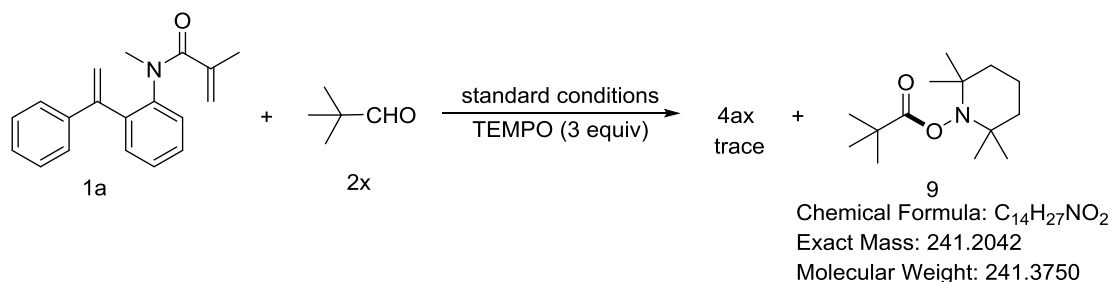

# Spectra of GC-MS

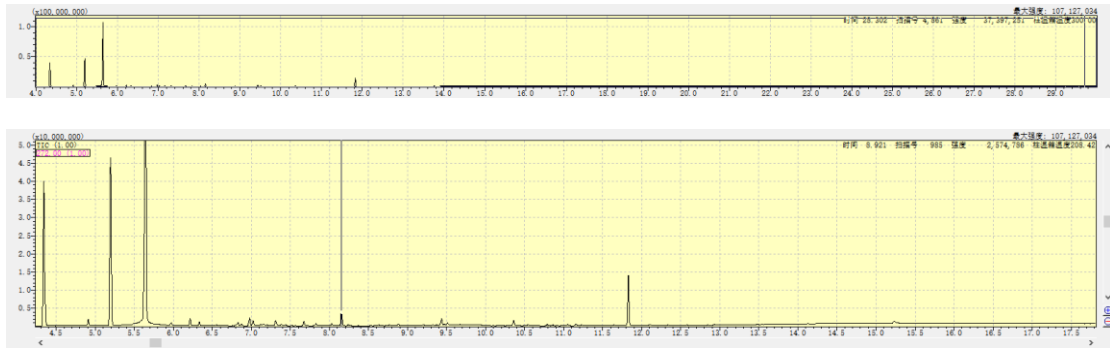

The MS spectra of the peak at 8.150min

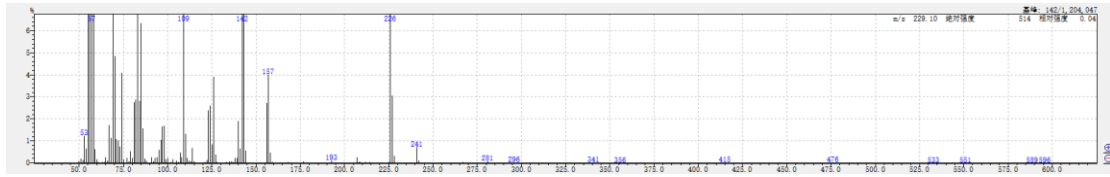

[MS Spectrum]

# of Peaks 411

Raw Spectrum 8.150 (scan : 831)

Background No Background Spectrum

Base Peak m/z 142.10 (Inten : 1,204,047)

Event# 1

| m/z   | Absolute Intensity | Relative Intensity |
|-------|--------------------|--------------------|
| 50.05 | 964 0.08           | 67.05 21077 1.75   |
| 51.05 | 2690 0.22          | 84.05 33983 2.82   |
| 52.05 | 1814 0.15          | 68.05 13877 1.15   |
| 53.00 | 15175 1.26         | 85.05 76542 6.36   |
| 54.00 | 8007 0.67          | 69.05 123416 10.25 |
| 55.05 | 218973 18.19       | 86.05 18892 1.57   |
| 56.05 | 118435 9.84        | 87.05 2552 0.21    |
| 57.05 | 1002049 83.22      | 88.05 1551 0.13    |
| 58.05 | 127951 10.63       | 89.00 444 0.04     |
| 59.10 | 7593 0.63          | 90.10 102 0.01     |
| 60.05 | 2339 0.19          | 91.10 3162 0.26    |
| 60.90 | 575 0.05           | 92.10 11830.10     |
| 62.10 | 444 0.04           | 93.05 2999 0.25    |
| 63.10 | 882 0.07           | 94.05 3228 0.27    |
| 64.05 | 588 0.05           | 95.10 7497 0.62    |
| 65.00 | 3282 0.27          | 96.10 12764 1.06   |
| 66.05 | 1472 0.12          | 97.05 20332 1.69   |
|       |                    | 98.05 20453 1.70   |
|       |                    | 99.05 2144 0.18    |
|       |                    | 100.10 2895 0.24   |

|        |          |        |        |       |      |        |          |       |
|--------|----------|--------|--------|-------|------|--------|----------|-------|
| 101.05 | 436      | 0.04   | 145.10 | 521   | 0.04 | 188.90 | 102      | 0.01  |
| 101.95 | 604      | 0.05   | 146.10 | 92    | 0.01 | 189.90 | 21       | 0.00  |
| 103.00 | 2217     | 0.18   | 147.00 | 506   | 0.04 | 190.75 | 424      | 0.04  |
| 104.15 | 426      | 0.04   | 148.00 | 134   | 0.01 | 191.70 | 172      | 0.01  |
| 105.10 | 1378     | 0.11   | 149.00 | 194   | 0.02 | 192.90 | 13110.11 |       |
| 106.15 | 597      | 0.05   | 150.00 | 135   | 0.01 | 193.90 | 273      | 0.02  |
| 107.05 | 5716     | 0.47   | 151.00 | 183   | 0.02 | 194.90 | 153      | 0.01  |
| 108.05 | 3406     | 0.28   | 151.95 | 328   | 0.03 | 195.90 | 130      | 0.01  |
| 109.10 | 93601    | 7.77   | 152.95 | 351   | 0.03 | 196.90 | 44       | 0.00  |
| 110.10 | 16254    | 1.35   | 154.05 | 533   | 0.04 | 197.90 | 126      | 0.01  |
| 111.10 | 2772     | 0.23   | 155.15 | 436   | 0.04 | 198.90 | 70       | 0.01  |
| 112.10 | 1506     | 0.13   | 156.10 | 33138 | 2.75 | 199.90 | 39       | 0.00  |
| 113.05 | 11220.09 |        | 157.05 | 48292 | 4.01 | 202.90 | 223      | 0.02  |
| 114.05 | 86110.72 |        | 158.05 | 5883  | 0.49 | 203.90 | 2        | 0.00  |
| 115.00 | 964      | 0.08   | 159.05 | 653   | 0.05 | 204.90 | 82       | 0.01  |
| 116.00 | 524      | 0.04   | 160.10 | 94    | 0.01 | 205.90 | 31       | 0.00  |
| 117.05 | 461      | 0.04   | 161.10 | 89    | 0.01 | 206.90 | 3367     | 0.28  |
| 118.10 | 308      | 0.03   | 162.10 | 97    | 0.01 | 208.00 | 633      | 0.05  |
| 119.10 | 394      | 0.03   | 163.10 | 206   | 0.02 | 208.90 | 636      | 0.05  |
| 120.05 | 503      | 0.04   | 164.10 | 223   | 0.02 | 209.90 | 207      | 0.02  |
| 121.05 | 813      | 0.07   | 165.10 | 124   | 0.01 | 210.90 | 162      | 0.01  |
| 122.10 | 1886     | 0.16   | 166.10 | 49    | 0.00 | 212.00 | 786      | 0.07  |
| 123.10 | 29063    | 2.41   | 167.10 | 90    | 0.01 | 213.00 | 68       | 0.01  |
| 124.10 | 31494    | 2.62   | 168.05 | 806   | 0.07 | 214.05 | 792      | 0.07  |
| 125.10 | 10092    | 0.84   | 169.10 | 337   | 0.03 | 215.10 | 132      | 0.01  |
| 126.10 | 47114    | 3.91   | 170.10 | 313   | 0.03 | 216.10 | 54       | 0.00  |
| 127.10 | 4863     | 0.40   | 171.10 | 102   | 0.01 | 217.10 | 31       | 0.00  |
| 128.10 | 794      | 0.07   | 172.10 | 92    | 0.01 | 218.10 | 58       | 0.00  |
| 129.00 | 463      | 0.04   | 173.10 | 135   | 0.01 | 219.10 | 206      | 0.02  |
| 130.00 | 142      | 0.01   | 174.10 | 41    | 0.00 | 220.10 | 62       | 0.01  |
| 131.15 | 527      | 0.04   | 175.10 | 50    | 0.00 | 221.10 | 162      | 0.01  |
| 132.00 | 185      | 0.02   | 175.95 | 482   | 0.04 | 222.10 | 86       | 0.01  |
| 133.05 | 821      | 0.07   | 176.90 | 1226  | 0.10 | 223.10 | 16       | 0.00  |
| 133.95 | 403      | 0.03   | 177.90 | 382   | 0.03 | 224.10 | 190      | 0.02  |
| 134.95 | 1232     | 0.10   | 178.90 | 297   | 0.02 | 225.05 | 726      | 0.06  |
| 136.05 | 930      | 0.08   | 179.90 | 68    | 0.01 | 226.05 | 244438   | 20.30 |
| 137.05 | 634      | 0.05   | 180.90 | 29    | 0.00 | 227.05 | 37178    | 3.09  |
| 138.10 | 2873     | 0.24   | 181.90 | 90    | 0.01 | 228.05 | 4050     | 0.34  |
| 139.10 | 2774     | 0.23   | 182.90 | 103   | 0.01 | 229.10 | 514      | 0.04  |
| 140.10 | 22932    | 1.90   | 183.90 | 8     | 0.00 | 230.10 | 6        | 0.00  |
| 141.15 | 7912     | 0.66   | 184.90 | 27    | 0.00 | 231.10 | 11       | 0.00  |
| 142.10 | 1204047  | 100.00 | 185.90 | 29    | 0.00 | 232.10 | 42       | 0.00  |
| 143.10 | 113090   | 9.39   | 186.90 | 65    | 0.01 | 233.10 | 33       | 0.00  |
| 144.05 | 6837     | 0.57   | 187.90 | 27    | 0.00 | 234.10 | 279      | 0.02  |

|        |     |      |               |             |             |        |     |      |
|--------|-----|------|---------------|-------------|-------------|--------|-----|------|
| 235.10 | 214 | 0.02 | 239.10        | 16          | 0.00        | 243.00 | 154 | 0.01 |
| 236.10 | 82  | 0.01 | <b>240.10</b> | <b>21</b>   | <b>0.00</b> | 247.00 | 19  | 0.00 |
| 237.10 | 145 | 0.01 | <b>241.05</b> | <b>8851</b> | <b>0.74</b> |        |     |      |
| 238.10 | 47  | 0.00 | <b>242.00</b> | <b>1540</b> | <b>0.13</b> |        |     |      |

### 2.4.3 GC-MS Analysis of Raw Reaction Mixture by Using 1,1-diphenylethene as Radical Inhibitor

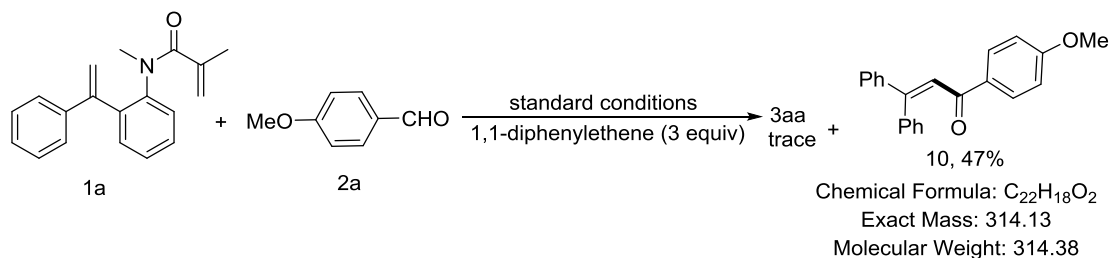

### Spectra of GC-MS

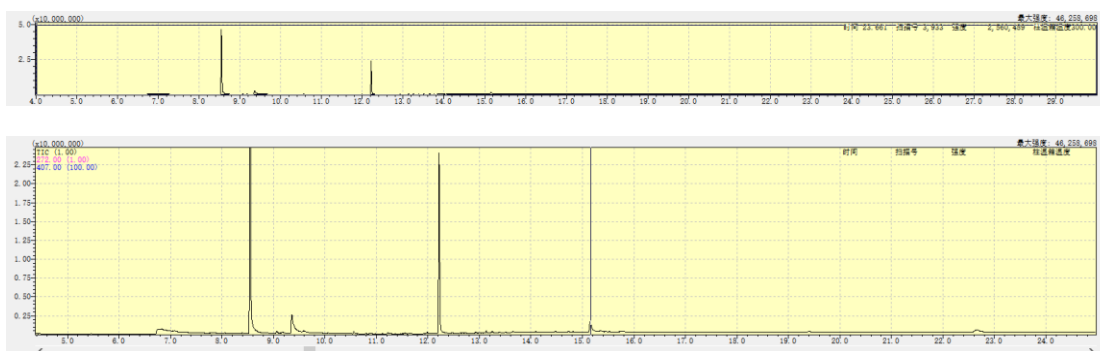

### The MS spectra of the peak at 15.150min

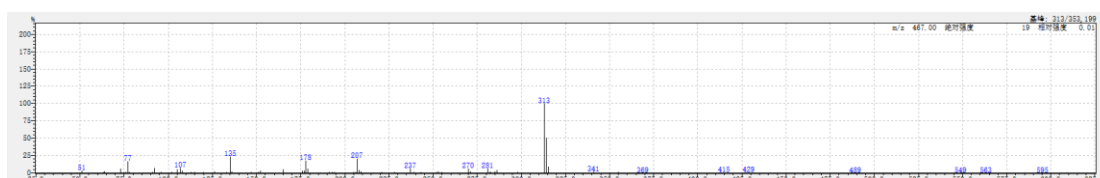

[MS Spectrum]

# of Peaks 549

Raw Spectrum 15.150 (scan : 2231)

Background No Background Spectrum

Base Peak m/z 313.10 (Inten : 346,735)

Event# 1

| m/z   | Absolute Intensity | Relative Intensity | m/z   | Absolute Intensity | Relative Intensity | m/z   | Absolute Intensity | Relative Intensity |
|-------|--------------------|--------------------|-------|--------------------|--------------------|-------|--------------------|--------------------|
| 50.00 | 2865               | 0.83               | 52.95 | 1706               | 0.49               | 56.05 | 1027               | 0.30               |
| 51.00 | 11081              | 3.20               | 53.90 | 190                | 0.05               | 57.05 | 1246               | 0.36               |
| 52.00 | 1839               | 0.53               | 54.95 | 1783               | 0.51               | 57.95 | 375                | 0.11               |

|        |          |       |        |          |       |        |       |       |
|--------|----------|-------|--------|----------|-------|--------|-------|-------|
| 58.95  | 1659     | 0.48  | 102.95 | 3105     | 0.90  | 147.05 | 6232  | 1.80  |
| 59.95  | 368      | 0.11  | 104.05 | 1527     | 0.44  | 148.15 | 1856  | 0.54  |
| 61.00  | 970      | 0.28  | 105.05 | 18131    | 5.23  | 149.10 | 2732  | 0.79  |
| 62.00  | 1279     | 0.37  | 106.15 | 3044     | 0.88  | 150.05 | 3350  | 0.97  |
| 63.05  | 7225     | 2.08  | 107.05 | 26475    | 7.64  | 151.10 | 6369  | 1.84  |
| 64.00  | 10135    | 2.92  | 108.05 | 12633    | 3.64  | 152.05 | 14350 | 4.14  |
| 65.00  | 2999     | 0.86  | 109.00 | 1814     | 0.52  | 153.05 | 2330  | 0.67  |
| 66.10  | 722      | 0.21  | 109.95 | 593      | 0.17  | 153.95 | 464   | 0.13  |
| 67.05  | 418      | 0.12  | 111.05 | 672      | 0.19  | 154.95 | 666   | 0.19  |
| 68.00  | 209      | 0.06  | 112.15 | 803      | 0.23  | 155.95 | 2198  | 0.63  |
| 69.00  | 1598     | 0.46  | 113.10 | 6039     | 1.74  | 156.95 | 4292  | 1.24  |
| 70.05  | 509      | 0.15  | 114.10 | 2740     | 0.79  | 157.85 | 982   | 0.28  |
| 71.10  | 846      | 0.24  | 115.05 | 4879     | 1.41  | 158.90 | 274   | 0.08  |
| 72.05  | 422      | 0.12  | 116.05 | 908      | 0.26  | 159.90 | 111   | 0.03  |
| 73.05  | 23675    | 6.83  | 116.75 | 1084     | 0.31  | 161.00 | 636   | 0.18  |
| 74.00  | 3612     | 1.04  | 117.75 | 989      | 0.29  | 162.05 | 616   | 0.18  |
| 75.00  | 5892     | 1.70  | 118.75 | 3043     | 0.88  | 163.00 | 2783  | 0.80  |
| 76.05  | 6704     | 1.93  | 119.65 | 6747     | 1.95  | 164.15 | 2619  | 0.76  |
| 77.00  | 58868    | 16.98 | 121.00 | 3932     | 1.13  | 165.10 | 19071 | 5.50  |
| 78.00  | 6167     | 1.78  | 122.10 | 1210     | 0.35  | 166.05 | 4215  | 1.22  |
| 79.00  | 3474     | 1.00  | 123.05 | 922      | 0.27  | 167.05 | 2249  | 0.65  |
| 79.95  | 358      | 0.10  | 124.15 | 383      | 0.11  | 168.05 | 1046  | 0.30  |
| 81.05  | 823      | 0.24  | 125.15 | 31180.90 |       | 169.05 | 1852  | 0.53  |
| 82.00  | 900      | 0.26  | 126.10 | 9580     | 2.76  | 170.00 | 249   | 0.07  |
| 83.00  | 764      | 0.22  | 127.05 | 3427     | 0.99  | 171.00 | 167   | 0.05  |
| 83.90  | 250      | 0.07  | 128.10 | 3660     | 1.06  | 172.00 | 63    | 0.02  |
| 84.95  | 763      | 0.22  | 129.05 | 1908     | 0.55  | 173.00 | 185   | 0.05  |
| 86.05  | 856      | 0.25  | 130.05 | 596      | 0.17  | 174.05 | 603   | 0.17  |
| 86.95  | 2055     | 0.59  | 131.05 | 1646     | 0.47  | 175.15 | 1363  | 0.39  |
| 88.05  | 1828     | 0.53  | 132.05 | 2060     | 0.59  | 176.05 | 13084 | 3.77  |
| 89.00  | 3364     | 0.97  | 133.00 | 6350     | 1.83  | 177.05 | 13522 | 3.90  |
| 89.95  | 543      | 0.16  | 134.05 | 3456     | 1.00  | 178.05 | 62917 | 18.15 |
| 91.05  | 5558     | 1.60  | 135.05 | 80804    | 23.30 | 179.05 | 24411 | 7.04  |
| 92.00  | 26897    | 7.76  | 136.00 | 9329     | 2.69  | 180.05 | 4394  | 1.27  |
| 93.05  | 2751     | 0.79  | 137.10 | 2353     | 0.68  | 181.05 | 888   | 0.26  |
| 94.05  | 1337     | 0.39  | 138.05 | 802      | 0.23  | 182.00 | 553   | 0.16  |
| 94.95  | 1722     | 0.50  | 139.00 | 3841     | 1.11  | 183.05 | 513   | 0.15  |
| 96.00  | 6652     | 1.92  | 140.05 | 1671     | 0.48  | 184.00 | 732   | 0.21  |
| 96.95  | 1976     | 0.57  | 141.05 | 3462     | 1.00  | 185.00 | 279   | 0.08  |
| 97.95  | 721      | 0.21  | 142.10 | 2169     | 0.63  | 186.00 | 190   | 0.05  |
| 99.05  | 11320.33 |       | 143.05 | 1669     | 0.48  | 187.00 | 580   | 0.17  |
| 100.05 | 1048     | 0.30  | 144.10 | 249      | 0.07  | 187.95 | 389   | 0.11  |
| 101.05 | 3506     | 1.01  | 145.10 | 481      | 0.14  | 188.90 | 2161  | 0.62  |
| 102.05 | 6525     | 1.88  | 146.05 | 279      | 0.08  | 190.05 | 1030  | 0.30  |



|        |          |       |        |          |      |               |               |               |
|--------|----------|-------|--------|----------|------|---------------|---------------|---------------|
| 191.00 | 8026     | 2.31  | 234.95 | 917      | 0.26 | 279.00        | 444           | 0.13          |
| 192.05 | 2316     | 0.67  | 236.05 | 2136     | 0.62 | 280.05        | 1824          | 0.53          |
| 192.95 | 61181.76 |       | 237.05 | 23408    | 6.75 | 281.00        | 25273         | 7.29          |
| 194.00 | 4948     | 1.43  | 238.05 | 4936     | 1.42 | 282.00        | 8433          | 2.43          |
| 195.05 | 2299     | 0.66  | 239.05 | 7172     | 2.07 | 283.00        | 5940          | 1.71          |
| 196.05 | 567      | 0.16  | 240.05 | 3565     | 1.03 | 284.05        | 2051          | 0.59          |
| 196.95 | 486      | 0.14  | 241.00 | 41181.19 |      | 285.10        | 10810         | 3.12          |
| 197.90 | 108      | 0.03  | 242.05 | 2124     | 0.61 | 286.10        | 17367         | 5.01          |
| 198.90 | 254      | 0.07  | 243.05 | 5470     | 1.58 | 287.10        | 3492          | 1.01          |
| 200.05 | 574      | 0.17  | 244.10 | 1550     | 0.45 | 288.05        | 560           | 0.16          |
| 201.05 | 682      | 0.20  | 245.05 | 647      | 0.19 | 289.10        | 212           | 0.06          |
| 202.00 | 2446     | 0.71  | 246.10 | 306      | 0.09 | 290.10        | 132           | 0.04          |
| 202.95 | 11910.34 |       | 247.05 | 445      | 0.13 | 291.10        | 130           | 0.04          |
| 204.05 | 890      | 0.26  | 247.95 | 323      | 0.09 | 292.10        | 76            | 0.02          |
| 205.05 | 7258     | 2.09  | 248.95 | 2231     | 0.64 | 293.10        | 489           | 0.14          |
| 206.05 | 7966     | 2.30  | 250.00 | 1721     | 0.50 | 294.20        | 226           | 0.07          |
| 207.00 | 74932    | 21.61 | 250.95 | 1868     | 0.54 | 295.15        | 1673          | 0.48          |
| 208.00 | 16604    | 4.79  | 252.05 | 6357     | 1.83 | 296.00        | 690           | 0.20          |
| 209.05 | 11807    | 3.41  | 253.05 | 88112.54 |      | 297.05        | 2308          | 0.67          |
| 210.05 | 2282     | 0.66  | 254.05 | 4094     | 1.18 | 298.05        | 7763          | 2.24          |
| 211.00 | 1665     | 0.48  | 255.00 | 5158     | 1.49 | 299.00        | 3684          | 1.06          |
| 211.95 | 377      | 0.11  | 256.10 | 1634     | 0.47 | 300.00        | 577           | 0.17          |
| 212.95 | 1253     | 0.36  | 256.90 | 689      | 0.20 | 301.00        | 166           | 0.05          |
| 214.05 | 382      | 0.11  | 258.20 | 335      | 0.10 | 302.00        | 100           | 0.03          |
| 215.05 | 4605     | 1.33  | 259.15 | 305      | 0.09 | 303.00        | 94            | 0.03          |
| 216.05 | 1284     | 0.37  | 260.20 | 156      | 0.04 | 304.00        | 225           | 0.06          |
| 217.05 | 831      | 0.24  | 260.80 | 146      | 0.04 | 305.00        | 121           | 0.03          |
| 218.00 | 663      | 0.19  | 261.75 | 643      | 0.19 | 306.00        | 57            | 0.02          |
| 219.05 | 964      | 0.28  | 263.00 | 572      | 0.16 | 307.00        | 210           | 0.06          |
| 220.05 | 296      | 0.09  | 264.05 | 411      | 0.12 | 308.00        | 87            | 0.03          |
| 221.05 | 6576     | 1.90  | 265.00 | 4854     | 1.40 | 309.00        | 305           | 0.09          |
| 222.00 | 2562     | 0.74  | 265.95 | 11880.34 |      | 310.00        | 273           | 0.08          |
| 222.95 | 1515     | 0.44  | 266.95 | 4186     | 1.21 | 311.05        | 1031          | 0.30          |
| 224.00 | 738      | 0.21  | 268.05 | 2470     | 0.71 | 312.15        | 4165          | 1.20          |
| 225.05 | 495      | 0.14  | 269.05 | 4546     | 1.31 | <b>313.10</b> | <b>346735</b> | <b>100.00</b> |
| 226.00 | 2614     | 0.75  | 270.05 | 22371    | 6.45 | <b>314.10</b> | <b>178004</b> | <b>51.34</b>  |
| 227.05 | 1781     | 0.51  | 271.05 | 10591    | 3.05 | <b>315.05</b> | <b>32792</b>  | <b>9.46</b>   |
| 228.05 | 5649     | 1.63  | 272.00 | 1772     | 0.51 | 316.10        | 4766          | 1.37          |
| 229.00 | 1849     | 0.53  | 273.15 | 436      | 0.13 | 317.00        | 862           | 0.25          |
| 229.95 | 631      | 0.18  | 274.20 | 186      | 0.05 | 318.00        | 281           | 0.08          |
| 231.05 | 728      | 0.21  | 275.10 | 198      | 0.06 | 319.00        | 66            | 0.02          |
| 232.00 | 257      | 0.07  | 276.10 | 615      | 0.18 | 320.00        | 127           | 0.04          |
| 233.00 | 342      | 0.10  | 277.10 | 222      | 0.06 | 321.00        | 126           | 0.04          |
| 234.05 | 355      | 0.10  | 278.05 | 521      | 0.15 | 322.00        | 65            | 0.02          |

|        |     |      |        |      |      |        |      |      |
|--------|-----|------|--------|------|------|--------|------|------|
| 323.00 | 238 | 0.07 | 324.95 | 2022 | 0.58 | 326.90 | 2916 | 0.84 |
| 324.00 | 134 | 0.04 | 325.95 | 628  | 0.18 | 328.05 | 645  | 0.19 |

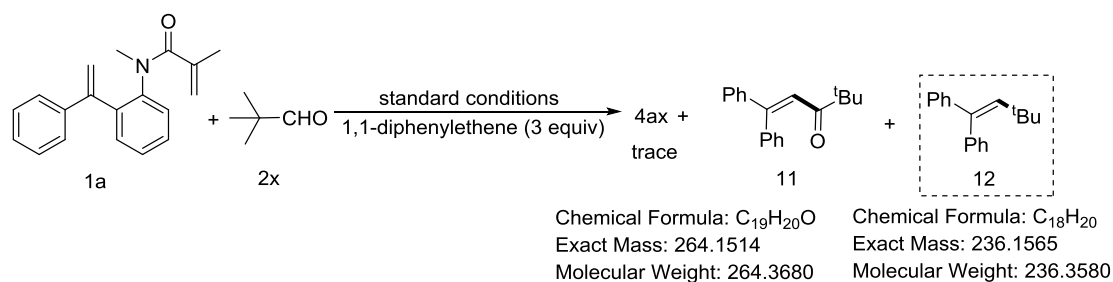

## Spectra of GC-MS

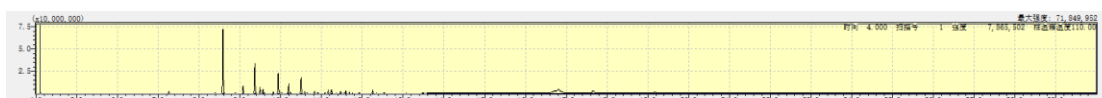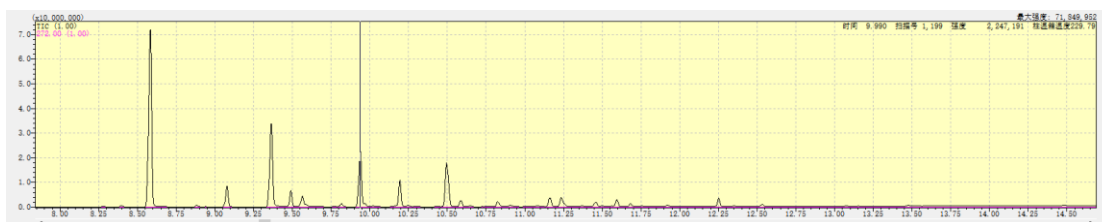

## The MS spectra of the peak at 9.940min

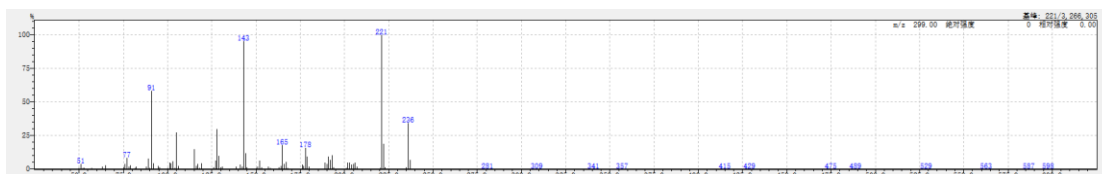

## [MS Spectrum]

# of Peaks 533

Raw Spectrum 9.940 (scan : 1189)

Background No Background Spectrum

Base Peak m/z 143.05 (Inten : 3,165,151)

Event# 1

| m/z   | Absolute Intensity | Relative Intensity |
|-------|--------------------|--------------------|
| 50.05 | 27839 0.88         | 55.05 20264 0.64   |
| 51.00 | 137417 4.34        | 60.00 260 0.01     |
| 52.05 | 27570 0.87         | 61.05 1391 0.04    |
| 53.05 | 26391 0.83         | 62.05 13837 0.44   |
| 54.05 | 1577 0.05          | 63.00 76073 2.40   |
|       |                    | 64.05 14078 0.44   |

|        |         |       |        |          |        |        |          |       |
|--------|---------|-------|--------|----------|--------|--------|----------|-------|
| 65.05  | 100308  | 3.17  | 109.05 | 7810     | 0.25   | 153.00 | 45537    | 1.44  |
| 66.05  | 7281    | 0.23  | 110.10 | 9676     | 0.31   | 154.00 | 7255     | 0.23  |
| 67.05  | 6538    | 0.21  | 111.05 | 5489     | 0.17   | 155.05 | 6609     | 0.21  |
| 67.95  | 1263    | 0.04  | 112.00 | 1932     | 0.06   | 156.05 | 2909     | 0.09  |
| 68.35  | 1041    | 0.03  | 113.05 | 24810    | 0.78   | 157.05 | 56964    | 1.80  |
| 69.30  | 12854   | 0.41  | 114.05 | 13030    | 0.41   | 158.05 | 39058    | 1.23  |
| 70.25  | 4212    | 0.13  | 115.05 | 496767   | 15.69  | 159.05 | 23714    | 0.75  |
| 71.25  | 1882    | 0.06  | 116.05 | 77488    | 2.45   | 160.05 | 2886     | 0.09  |
| 72.00  | 654     | 0.02  | 117.05 | 141490   | 4.47   | 161.05 | 1952     | 0.06  |
| 73.00  | 1961    | 0.06  | 118.10 | 30585    | 0.97   | 162.00 | 7223     | 0.23  |
| 74.05  | 24621   | 0.78  | 119.05 | 149374   | 4.72   | 162.95 | 54482    | 1.72  |
| 75.05  | 52017   | 1.64  | 120.10 | 15956    | 0.50   | 164.00 | 79650    | 2.52  |
| 76.05  | 135029  | 4.27  | 121.10 | 1287     | 0.04   | 165.00 | 577993   | 18.26 |
| 77.05  | 296418  | 9.37  | 121.95 | 11370.04 |        | 166.00 | 126311   | 3.99  |
| 78.05  | 68614   | 2.17  | 123.10 | 1388     | 0.04   | 167.00 | 174431   | 5.51  |
| 79.05  | 97950   | 3.09  | 124.05 | 1277     | 0.04   | 168.00 | 25503    | 0.81  |
| 80.45  | 4088    | 0.13  | 125.05 | 6664     | 0.21   | 169.00 | 2297     | 0.07  |
| 81.55  | 27378   | 0.86  | 126.05 | 49659    | 1.57   | 170.00 | 625      | 0.02  |
| 82.45  | 62300   | 1.97  | 127.05 | 222196   | 7.02   | 171.00 | 130      | 0.00  |
| 83.45  | 11905   | 0.38  | 128.05 | 1006822  | 31.81  | 172.00 | 62       | 0.00  |
| 84.95  | 1095    | 0.03  | 129.05 | 342357   | 10.82  | 173.00 | 230      | 0.01  |
| 86.00  | 9319    | 0.29  | 130.10 | 49655    | 1.57   | 173.95 | 5192     | 0.16  |
| 87.05  | 24603   | 0.78  | 131.10 | 65780    | 2.08   | 175.05 | 10329    | 0.33  |
| 88.00  | 73002   | 2.31  | 132.10 | 10220    | 0.32   | 175.95 | 109479   | 3.46  |
| 89.05  | 280639  | 8.87  | 133.05 | 2073     | 0.07   | 177.00 | 76994    | 2.43  |
| 89.95  | 32727   | 1.03  | 134.05 | 689      | 0.02   | 178.00 | 524404   | 16.57 |
| 91.05  | 1995219 | 63.04 | 134.95 | 1378     | 0.04   | 178.95 | 308847   | 9.76  |
| 92.05  | 152408  | 4.82  | 136.00 | 242      | 0.01   | 180.00 | 58495    | 1.85  |
| 92.60  | 22847   | 0.72  | 137.00 | 7954     | 0.25   | 181.00 | 19316    | 0.61  |
| 93.65  | 16838   | 0.53  | 138.05 | 6394     | 0.20   | 182.00 | 4532     | 0.14  |
| 94.65  | 89255   | 2.82  | 139.00 | 73990    | 2.34   | 183.00 | 1246     | 0.04  |
| 95.55  | 47864   | 1.51  | 140.00 | 9508     | 0.30   | 184.00 | 247      | 0.01  |
| 96.55  | 21747   | 0.69  | 141.05 | 122303   | 3.86   | 184.95 | 479      | 0.02  |
| 97.95  | 7051    | 0.22  | 142.05 | 66451    | 2.10   | 185.95 | 771      | 0.02  |
| 99.10  | 7530    | 0.24  | 143.05 | 3165151  | 100.00 | 186.95 | 10594    | 0.33  |
| 100.10 | 31430   | 0.99  | 144.05 | 384517   | 12.15  | 188.05 | 12197    | 0.39  |
| 101.05 | 178500  | 5.64  | 145.05 | 57144    | 1.81   | 188.95 | 168754   | 5.33  |
| 102.05 | 153404  | 4.85  | 146.05 | 5345     | 0.17   | 190.00 | 121258   | 3.83  |
| 103.05 | 197284  | 6.23  | 147.00 | 833      | 0.03   | 191.00 | 306135   | 9.67  |
| 104.15 | 29039   | 0.92  | 147.95 | 379      | 0.01   | 192.00 | 222558   | 7.03  |
| 105.10 | 933361  | 29.49 | 149.00 | 3706     | 0.12   | 193.00 | 334759   | 10.58 |
| 106.10 | 86159   | 2.72  | 150.00 | 32129    | 1.02   | 194.00 | 54194    | 1.71  |
| 107.40 | 18228   | 0.58  | 151.00 | 69625    | 2.20   | 195.00 | 5866     | 0.19  |
| 108.35 | 9552    | 0.30  | 152.00 | 217113   | 6.86   | 196.00 | 11530.04 |       |

|        |        |      |        |         |       |               |                |              |
|--------|--------|------|--------|---------|-------|---------------|----------------|--------------|
| 196.95 | 425    | 0.01 | 212.95 | 5308    | 0.17  | 229.10        | 327            | 0.01         |
| 198.00 | 1057   | 0.03 | 213.95 | 2132    | 0.07  | 230.10        | 169            | 0.01         |
| 199.05 | 1837   | 0.06 | 214.95 | 16902   | 0.53  | 231.10        | 206            | 0.01         |
| 199.95 | 18965  | 0.60 | 216.00 | 5578    | 0.18  | 232.05        | 369            | 0.01         |
| 201.00 | 24519  | 0.77 | 217.00 | 5958    | 0.19  | 233.00        | 588            | 0.02         |
| 201.95 | 167778 | 5.30 | 218.00 | 3759    | 0.12  | 234.00        | 1854           | 0.06         |
| 202.95 | 160605 | 5.07 | 218.95 | 18156   | 0.57  | <b>235.05</b> | <b>43463</b>   | <b>1.37</b>  |
| 203.95 | 104315 | 3.30 | 220.05 | 25161   | 0.79  | <b>236.00</b> | <b>1073607</b> | <b>33.92</b> |
| 205.00 | 124089 | 3.92 | 221.00 | 3151194 | 99.56 | <b>237.00</b> | <b>211913</b>  | <b>6.70</b>  |
| 206.00 | 161238 | 5.09 | 222.00 | 580988  | 18.36 | 238.00        | 18494          | 0.58         |
| 207.00 | 68982  | 2.18 | 223.00 | 50559   | 1.60  | 238.95        | 11400.04       |              |
| 208.00 | 10207  | 0.32 | 223.95 | 3152    | 0.10  | 240.00        | 82             | 0.00         |
| 209.00 | 1700   | 0.05 | 224.95 | 314     | 0.01  | 240.95        | 470            | 0.01         |
| 209.85 | 339    | 0.01 | 226.00 | 510     | 0.02  | 241.90        | 121            | 0.00         |
| 210.80 | 636    | 0.02 | 227.00 | 255     | 0.01  |               |                |              |
| 212.00 | 390    | 0.01 | 228.05 | 442     | 0.01  |               |                |              |

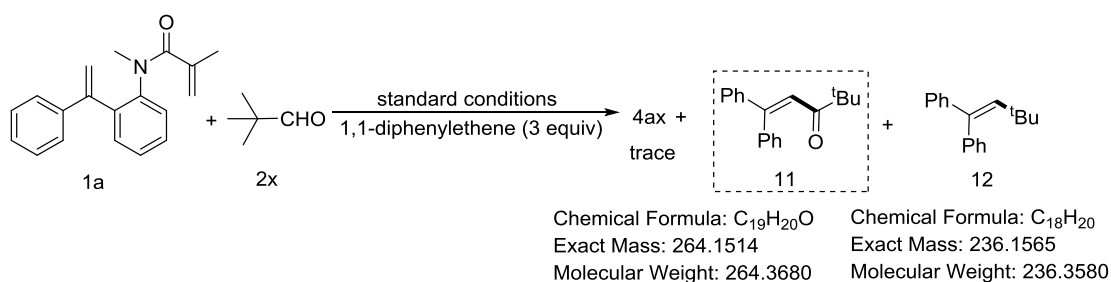

## Spectra of GC-MS

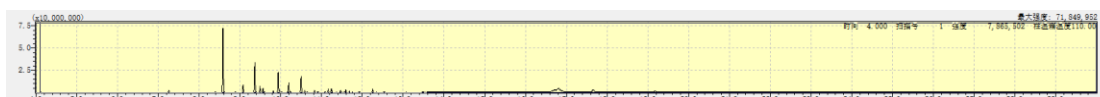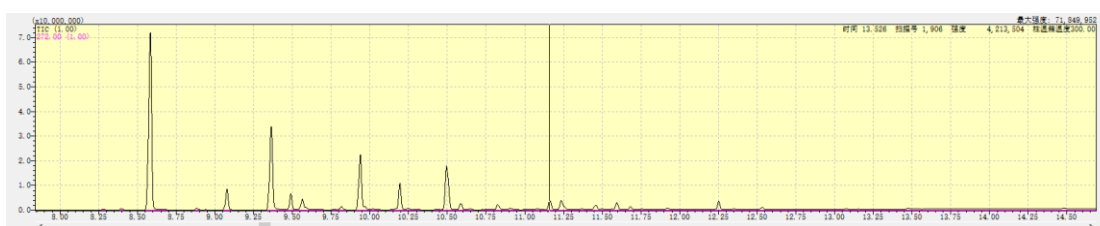

## The MS spectra of the peak at 11.165min

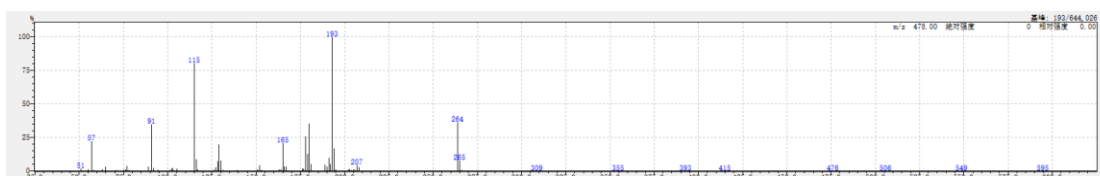

[MS Spectrum]

# of Peaks 533

Raw Spectrum 11.165 (scan : 1434)

Background No Background Spectrum

Base Peak m/z 193.00 (Inten : 600,054)

Event# 1

| m/z Absolute Intensity |        |       | Relative Intensity |        |       |        |          |       |
|------------------------|--------|-------|--------------------|--------|-------|--------|----------|-------|
| 50.00                  | 3076   | 0.51  | 88.00              | 4396   | 0.73  | 125.05 | 1392     | 0.23  |
| 51.00                  | 12596  | 2.10  | 89.00              | 21089  | 3.51  | 126.05 | 5566     | 0.93  |
| 52.00                  | 2529   | 0.42  | 90.00              | 3094   | 0.52  | 127.05 | 18984    | 3.16  |
| 53.05                  | 3804   | 0.63  | 91.05              | 229909 | 38.31 | 128.05 | 48754    | 8.12  |
| 54.00                  | 556    | 0.09  | 92.05              | 17491  | 2.91  | 129.05 | 131918   | 21.98 |
| 55.05                  | 9644   | 1.61  | 93.45              | 1473   | 0.25  | 130.05 | 50094    | 8.35  |
| 56.15                  | 4104   | 0.68  | 94.40              | 5270   | 0.88  | 131.05 | 6829     | 1.14  |
| 57.05                  | 153481 | 25.58 | 95.35              | 3708   | 0.62  | 132.05 | 555      | 0.09  |
| 58.05                  | 6967   | 1.16  | 96.35              | 2064   | 0.34  | 133.00 | 1588     | 0.26  |
| 59.05                  | 344    | 0.06  | 96.95              | 1676   | 0.28  | 133.90 | 602      | 0.10  |
| 60.00                  | 103    | 0.02  | 98.05              | 1089   | 0.18  | 135.05 | 1771     | 0.30  |
| 61.00                  | 410    | 0.07  | 99.10              | 1316   | 0.22  | 136.00 | 199      | 0.03  |
| 62.00                  | 2150   | 0.36  | 100.05             | 1547   | 0.26  | 137.00 | 1550     | 0.26  |
| 63.00                  | 10535  | 1.76  | 101.05             | 5509   | 0.92  | 137.95 | 734      | 0.12  |
| 64.05                  | 1951   | 0.33  | 102.05             | 13645  | 2.27  | 139.05 | 7439     | 1.24  |
| 65.05                  | 25122  | 4.19  | 103.05             | 16676  | 2.78  | 140.05 | 11700.19 |       |
| 66.10                  | 1782   | 0.30  | 104.05             | 3201   | 0.53  | 141.05 | 4204     | 0.70  |
| 67.15                  | 901    | 0.15  | 105.05             | 13084  | 2.18  | 142.05 | 11470.19 |       |
| 68.10                  | 249    | 0.04  | 106.10             | 1609   | 0.27  | 143.00 | 3054     | 0.51  |
| 69.15                  | 4715   | 0.79  | 107.15             | 1432   | 0.24  | 144.05 | 358      | 0.06  |
| 70.05                  | 1500   | 0.25  | 108.05             | 1099   | 0.18  | 145.05 | 901      | 0.15  |
| 71.10                  | 5342   | 0.89  | 109.10             | 255    | 0.04  | 146.00 | 11860.20 |       |
| 72.05                  | 344    | 0.06  | 110.10             | 710    | 0.12  | 147.00 | 1326     | 0.22  |
| 73.00                  | 2708   | 0.45  | 110.95             | 490    | 0.08  | 148.05 | 276      | 0.05  |
| 74.05                  | 2354   | 0.39  | 112.05             | 560    | 0.09  | 148.95 | 2797     | 0.47  |
| 75.00                  | 5983   | 1.00  | 113.05             | 3632   | 0.61  | 150.00 | 3830     | 0.64  |
| 76.05                  | 9957   | 1.66  | 114.05             | 3401   | 0.57  | 151.00 | 8329     | 1.39  |
| 77.05                  | 26273  | 4.38  | 115.05             | 521836 | 86.96 | 152.00 | 28065    | 4.68  |
| 78.05                  | 6974   | 1.16  | 116.05             | 55888  | 9.31  | 153.00 | 7582     | 1.26  |
| 79.05                  | 4524   | 0.75  | 117.05             | 9149   | 1.52  | 154.10 | 1726     | 0.29  |
| 80.55                  | 424    | 0.07  | 118.05             | 1056   | 0.18  | 155.00 | 11850.20 |       |
| 81.55                  | 2307   | 0.38  | 119.00             | 1247   | 0.21  | 156.05 | 433      | 0.07  |
| 82.55                  | 4067   | 0.68  | 120.00             | 249    | 0.04  | 157.00 | 481      | 0.08  |
| 83.45                  | 887    | 0.15  | 121.00             | 562    | 0.09  | 158.00 | 214      | 0.04  |
| 85.00                  | 462    | 0.08  | 122.00             | 340    | 0.06  | 159.00 | 439      | 0.07  |
| 86.00                  | 1295   | 0.22  | 123.00             | 193    | 0.03  | 160.00 | 201      | 0.03  |
| 87.05                  | 2450   | 0.41  | 124.15             | 489    | 0.08  | 161.00 | 337      | 0.06  |

|        |          |        |        |          |      |               |               |              |
|--------|----------|--------|--------|----------|------|---------------|---------------|--------------|
| 161.95 | 11230.19 |        | 198.00 | 148      | 0.02 | 233.80        | 247           | 0.04         |
| 162.95 | 8793     | 1.47   | 198.90 | 194      | 0.03 | 234.85        | 559           | 0.09         |
| 164.05 | 10482    | 1.75   | 199.90 | 1343     | 0.22 | 235.90        | 767           | 0.13         |
| 165.00 | 131530   | 21.92  | 201.05 | 1801     | 0.30 | 236.90        | 401           | 0.07         |
| 165.95 | 21418    | 3.57   | 202.00 | 9369     | 1.56 | 237.90        | 74            | 0.01         |
| 167.00 | 21378    | 3.56   | 202.95 | 10228    | 1.70 | 238.90        | 236           | 0.04         |
| 168.00 | 3162     | 0.53   | 204.00 | 6055     | 1.01 | 239.90        | 234           | 0.04         |
| 169.00 | 746      | 0.12   | 205.00 | 8682     | 1.45 | 240.95        | 672           | 0.11         |
| 170.00 | 210      | 0.03   | 206.00 | 7617     | 1.27 | 242.00        | 63            | 0.01         |
| 171.00 | 559      | 0.09   | 206.95 | 28751    | 4.79 | 243.00        | 218           | 0.04         |
| 172.00 | 145      | 0.02   | 208.00 | 20887    | 3.48 | 244.00        | 42            | 0.01         |
| 173.00 | 322      | 0.05   | 208.90 | 4054     | 0.68 | 245.00        | 340           | 0.06         |
| 174.05 | 648      | 0.11   | 209.85 | 701      | 0.12 | 246.00        | 191           | 0.03         |
| 174.95 | 1049     | 0.17   | 210.90 | 247      | 0.04 | 246.95        | 1528          | 0.25         |
| 176.00 | 13199    | 2.20   | 211.90 | 126      | 0.02 | 248.20        | 378           | 0.06         |
| 177.00 | 13202    | 2.20   | 212.90 | 598      | 0.10 | 249.00        | 577           | 0.10         |
| 177.95 | 162202   | 27.03  | 214.00 | 247      | 0.04 | 249.85        | 431           | 0.07         |
| 179.00 | 81980    | 13.66  | 215.00 | 1393     | 0.23 | 250.80        | 564           | 0.09         |
| 180.00 | 220638   | 36.77  | 215.90 | 630      | 0.10 | 251.85        | 412           | 0.07         |
| 181.00 | 34940    | 5.82   | 217.05 | 902      | 0.15 | 252.90        | 263           | 0.04         |
| 182.00 | 41110.69 |        | 218.00 | 788      | 0.13 | 253.90        | 250           | 0.04         |
| 182.95 | 328      | 0.05   | 218.95 | 2520     | 0.42 | 254.90        | 148           | 0.02         |
| 184.00 | 2        | 0.00   | 220.00 | 815      | 0.14 | 256.00        | 460           | 0.08         |
| 185.10 | 129      | 0.02   | 221.05 | 2597     | 0.43 | 257.00        | 106           | 0.02         |
| 186.05 | 3826     | 0.64   | 222.05 | 800      | 0.13 | 258.00        | 81            | 0.01         |
| 186.95 | 2271     | 0.38   | 223.00 | 11420.19 |      | 259.00        | 60            | 0.01         |
| 188.00 | 2191     | 0.37   | 223.90 | 598      | 0.10 | 260.00        | 182           | 0.03         |
| 188.95 | 32843    | 5.47   | 224.90 | 145      | 0.02 | 261.10        | 114           | 0.02         |
| 189.95 | 20922    | 3.49   | 225.90 | 361      | 0.06 | 262.05        | 1392          | 0.23         |
| 191.00 | 60079    | 10.01  | 226.90 | 238      | 0.04 | <b>263.15</b> | <b>4138</b>   | <b>0.69</b>  |
| 192.05 | 33787    | 5.63   | 227.90 | 206      | 0.03 | <b>264.05</b> | <b>215314</b> | <b>35.88</b> |
| 193.00 | 600054   | 100.00 | 228.90 | 318      | 0.05 | <b>265.05</b> | <b>44097</b>  | <b>7.35</b>  |
| 194.00 | 104863   | 17.48  | 229.90 | 161      | 0.03 | 266.05        | 4774          | 0.80         |
| 194.95 | 8189     | 1.36   | 230.90 | 310      | 0.05 | 266.95        | 1586          | 0.26         |
| 196.00 | 836      | 0.14   | 231.90 | 98       | 0.02 | 268.00        | 215           | 0.04         |
| 197.00 | 266      | 0.04   | 232.95 | 452      | 0.08 | 269.00        | 228           | 0.04         |

### 3. Characterization data for all products

#### 11b-(2-(4-methoxyphenyl)-2-oxoethyl)-5,6a-dimethyl-5,6a,7,11b-tetrahydro-6H-indeno[2,1-c]quinolin-6-one (3aa):

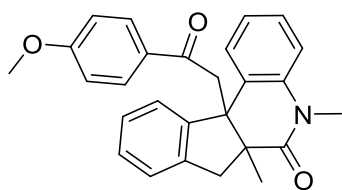

by silica gel column chromatography (hexane/ethyl acetate = 12:1), yield: 49.0 mg, 74%; white solid; mp 178.0-178.5 °C (uncorrected); <sup>1</sup>H NMR (400 MHz, CDCl<sub>3</sub>) δ: 7.80-7.78

(m, 2H), 7.63 (d, *J* = 7.6 Hz, 1H), 7.35-7.32 (m, 1H), 7.22-7.17 (m, 3H), 7.09-7.05 (m, 1H), 6.88-6.79 (m, 4H), 4.05 (d, *J* = 16.8 Hz, 1H), 3.81 (s, 3H), 3.49 (s, 3H), 3.44 (d, *J* = 16.9 Hz, 1H), 3.18 (d, *J* = 15.1 Hz, 1H), 2.81 (d, *J* = 15.2 Hz, 1H), 1.32 (s, 3H); <sup>13</sup>C{<sup>1</sup>H}NMR (100 MHz, CDCl<sub>3</sub>) δ: 195.6, 173.5, 163.3, 148.1, 140.9, 139.9, 130.2, 129.9, 129.0, 127.5, 127.1, 126.6, 126.3, 124.9, 123.9, 122.4, 114.4, 113.4, 55.4, 54.1, 52.4, 45.4, 45.0, 30.1, 18.9; HRMS (ESI-TOF) *m/z*: C<sub>27</sub>H<sub>26</sub>NO<sub>3</sub> (M + H)<sup>+</sup> calcd for 412.1908, found 412.1912.

#### 5,6a-dimethyl-11b-(2-oxo-2-(p-tolyl)ethyl)-5,6a,7,11b-tetrahydro-6H-indeno[2,1-c]

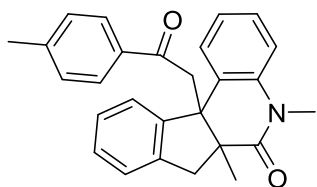

]quinolin-6-one (3ab): by silica gel column chromatography (hexane/ethyl acetate = 12:1), yield: 61.6 mg, 78%; white solid; mp 104.0-104.5 °C (uncorrected); <sup>1</sup>H NMR (400 MHz, CDCl<sub>3</sub>) δ: 7.71 (d, *J* = 8.2 Hz, 2H),

7.63 (d, *J* = 7.5 Hz, 1H), 7.36-7.32 (m, 1H), 7.21-7.19 (m, 3H), 7.14 (d, *J* = 8.0 Hz, 2H), 7.10-7.06 (m, 1H), 6.89-6.83 (m, 2H), 4.08 (d, *J* = 17.2 Hz, 1H), 3.50-3.45 (m, 4H), 3.19 (d, *J* = 15.2 Hz, 1H), 2.81 (d, *J* = 15.3 Hz, 1H), 2.35 (s, 3H), 1.30 (s, 3H); <sup>13</sup>C{<sup>1</sup>H}NMR (100 MHz, CDCl<sub>3</sub>) δ: 196.7, 173.5, 148.2, 143.7, 140.9, 140.0, 134.3, 129.0 (2C), 128.1, 127.5, 127.1, 126.7, 126.2, 124.9, 123.9, 122.4, 114.4, 54.1, 52.4, 45.7, 45.0, 30.1, 21.6, 18.9; HRMS (ESI-TOF) *m/z*: C<sub>27</sub>H<sub>26</sub>NO<sub>2</sub> (M + H)<sup>+</sup> calcd for 396.1958, found 396.1966.

#### 11b-(2-(4-ethylphenyl)-2-oxoethyl)-5,6a-dimethyl-5,6a,7,11b-tetrahydro-6H-inde

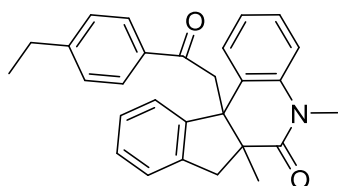

no[2,1-c]quinolin-6-one (3ac): by silica gel column chromatography (hexane/ethyl acetate = 12:1), yield: 57.3 mg, 70%; white solid; mp 173.0-173.5 °C

(uncorrected);  $^1\text{H}$  NMR (400 MHz,  $\text{CDCl}_3$ )  $\delta$ : 7.74 (d,  $J = 8.3$  Hz, 2H), 7.64 (d,  $J = 7.5$  Hz, 1H), 7.36-7.32 (m, 1H), 7.22-7.15 (m, 5H), 7.09-7.05 (m, 1H), 6.88- 6.82 (m, 2H), 4.09 (d,  $J = 17.2$  Hz, 1H), 3.47 (d,  $J = 19.0$  Hz, 4H), 3.19 (d,  $J = 15.2$  Hz, 1H), 2.81 (d,  $J = 15.2$  Hz, 1H), 2.67-2.61 (m, 2H), 1.31 (s, 3H), 1.20 (t,  $J = 7.6$  Hz, 3H);  $^{13}\text{C}\{^1\text{H}\}$ NMR (100 MHz,  $\text{CDCl}_3$ )  $\delta$ : 196.7, 173.5, 149.9, 148.1, 140.8, 139.9, 134.5, 129.0, 128.2, 127.8, 127.4, 127.1, 126.6, 126.2, 124.9, 123.9, 122.4, 114.4, 54.1, 52.3, 45.8, 45.0, 30.0, 28.8, 18.8, 15.2; HRMS (ESI-TOF)  $m/z$ :  $\text{C}_{28}\text{H}_{28}\text{NO}_2$  ( $\text{M} + \text{H}$ ) $^+$  calcd for 410.2115, found 410.2119.

**11b-(2-(4-isopropylphenyl)-2-oxoethyl)-5,6a-dimethyl-5,6a,7,11b-tetrahydro-6H-i**

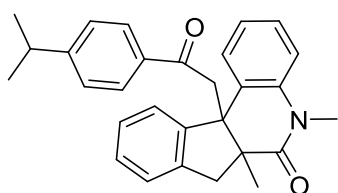

**ndeno[2,1-c]quinolin-6-one (3ad)**: by silica gel column chromatography (hexane/ethyl acetate = 12:1), yield: 65.2 mg, 76%; white solid; mp 127.0-127.5  $^\circ\text{C}$  (uncorrected);  $^1\text{H}$  NMR (400 MHz,  $\text{CDCl}_3$ )  $\delta$ : 7.76 (d,  $J = 8.3$  Hz, 2H), 7.63 (d,  $J = 7.5$  Hz, 1H), 7.36-7.32 (m, 1H), 7.22-7.17 (m, 5H), 7.09-7.04 (m, 1H), 6.87-6.82 (m, 2H), 4.10 (d,  $J = 17.3$  Hz, 1H), 3.50-3.45 (m, 4H), 3.19 (d,  $J = 15.2$  Hz, 1H), 2.93-2.87 (m, 1H), 2.81 (d,  $J = 15.3$  Hz, 1H), 1.31 (s, 3H), 1.22 (d,  $J = 6.9$  Hz, 6H);  $^{13}\text{C}\{^1\text{H}\}$ NMR (100 MHz,  $\text{CDCl}_3$ )  $\delta$ : 196.7, 173.5, 154.4, 148.1, 140.9, 139.9, 134.6, 129.0, 128.2, 127.4, 127.1, 126.7, 126.3, 126.2, 124.9, 123.9, 122.4, 114.3, 54.1, 52.3, 45.8, 45.0, 34.1, 30.1, 23.6(2C), 18.84; HRMS (ESI-TOF)  $m/z$ :  $\text{C}_{29}\text{H}_{30}\text{NO}_2$  ( $\text{M} + \text{H}$ ) $^+$  calcd for 424.2271, found 424.2276.

**11b-(2-(4-(tert-butyl)phenyl)-2-oxoethyl)-5,6a-dimethyl-5,6a,7,11b-tetrahydro-6**

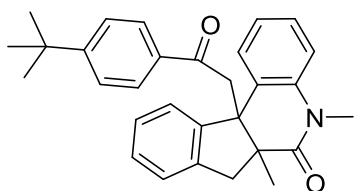

**H-indeno[2,1-c]quinolin-6-one (3ae)**: by silica gel column chromatography (hexane/ethyl acetate = 12:1), yield: 59.4 mg, 68%; yellow solid; mp 181.0-181.5  $^\circ\text{C}$  (uncorrected);  $^1\text{H}$  NMR (400 MHz,  $\text{CDCl}_3$ )  $\delta$ : 7.75 (d,  $J = 8.2$  Hz, 2H), 7.63 (d,  $J = 7.6$  Hz, 1H), 7.37-7.32 (m, 3H), 7.23-7.17 (m, 3H), 7.07 (t,  $J = 7.7$  Hz, 1H), 6.88-6.82 (m, 2H), 4.11 (d,  $J = 17.3$  Hz, 1H), 3.80 (s, 3H), 3.47 (d,  $J = 21.1$  Hz, 4H), 3.19 (d,  $J = 15.2$  Hz, 1H), 2.82 (d,  $J = 15.2$  Hz, 1H), 1.29 (s, 9H);  $^{13}\text{C}\{^1\text{H}\}$ NMR (100 MHz,  $\text{CDCl}_3$ )  $\delta$ : 196.7, 173.6, 156.6, 148.2, 140.9, 140.0, 134.2,



129.0, 127.9, 127.5, 127.1, 126.7, 125.2, 124.9, 123.9, 122.4, 114.4, 54.1, 52.4, 45.9, 45.1, 35.0, 31.0, 30.1, 18.9; HRMS (ESI-TOF)  $m/z$ :  $C_{30}H_{32}NO_2$  ( $M + H$ )<sup>+</sup> calcd for 438.2428, found 438.2423.

**11b-(2-(4-fluorophenyl)-2-oxoethyl)-5,6a-dimethyl-5,6a,7,11b-tetrahydro-6H-ind**

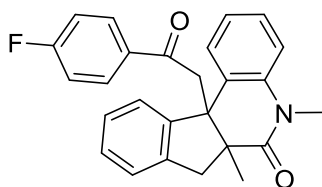

**eno[2,1-c]quinolin-6-one (3af):** by silica gel column

chromatography (hexane/ethyl acetate = 12:1), yield: 51.9

mg, 65%; white solid; mp 118.0-118.5°C (uncorrected);

<sup>1</sup>H NMR (400 MHz, CDCl<sub>3</sub>) δ: 7.84-7.80 (m, 2H), 7.63

(d,  $J = 7.5$  Hz, 1H), 7.34 (t,  $J = 6.8$  Hz, 1H), 7.24-7.17 (m, 3H), 7.11-7.07 (m, 1H),

7.01 (t,  $J = 6.8$  Hz, 2H), 6.88-6.84 (m, 2H), 4.06 (d,  $J = 16.9$  Hz, 1H), 3.45 (d,  $J = 8.6$

Hz, 4H), 3.17 (d,  $J = 15.2$  Hz, 1H), 2.81 (d,  $J = 15.3$  Hz, 1H), 1.32 (s, 3H); <sup>19</sup>F NMR

(282 MHz, CDCl<sub>3</sub>) δ: -105.2 (s, 1F); <sup>13</sup>C{<sup>1</sup>H}NMR (100 MHz, CDCl<sub>3</sub>) δ: 195.7 ,

173.4 , 166.8(d,  $J_{C-F} = 253.5$  Hz, 1C), 147.8 , 140.9 , 139.9 , 133.2(d,  $J_{C-F} = 3.0$  Hz,

1C), 130.7(d,  $J_{C-F} = 9.2$  Hz, 1C) , 129.0 , 127.6 , 127.2 , 126.7 , 126.1 , 125.0 , 123.9 ,

122.5 , 115.5(d,  $J_{C-F} = 21.6$  Hz, 1C), 114.4, 54.1, 52.4 , 45.6, 44.9, 30.1, 18.9; HRMS

(ESI-TOF)  $m/z$ :  $C_{26}H_{23}FNO_2$  ( $M + H$ )<sup>+</sup> calcd for 400.1707, found 400.1716.

**11b-(2-(4-chlorophenyl)-2-oxoethyl)-5,6a-dimethyl-5,6a,7,11b-tetrahydro-6H-ind**

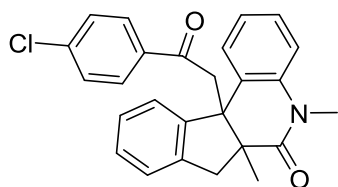

**eno[2,1-c]quinolin-6-one (3ag):** by silica gel column

chromatography (hexane/ethyl acetate = 12:1), yield:

51.4 mg, 62%; white solid; mp 133.0-133.5 °C

(uncorrected); <sup>1</sup>H NMR (400 MHz, CDCl<sub>3</sub>) δ: 7.72 (s,

1H), 7.65 (t,  $J = 7.0$  Hz, 2H), 7.44-7.42 (m, 1H), 7.35 (t,  $J = 7.7$  Hz, 1H), 7.28 (d,  $J =$

7.9 Hz, 1H), 7.23-7.17 (m, 3H), 7.10-7.06 (m, 1H), 6.87-6.84 (m, 2H), 4.04 (d,  $J =$

16.9 Hz, 1H), 3.46 (d,  $J = 15.2$  Hz, 4H), 3.17 (d,  $J = 15.2$  Hz, 1H), 2.81 (d,  $J = 15.2$

Hz, 1H), 1.32 (s, 3H); <sup>13</sup>C{<sup>1</sup>H}NMR (100 MHz, CDCl<sub>3</sub>) δ: 196.2, 173.3, 147.6, 140.8,

139.7, 138.2, 132.8, 129.6, 129.0, 128.1, 127.7, 127.2, 126.7, 126.0, 125.0, 123.9,

122.6, 114.4, 54.1, 52.4, 45.6, 44.8, 30.1, 18.8; HRMS (ESI-TOF)  $m/z$ :  $C_{26}H_{23}ClNO_2$

( $M + H$ )<sup>+</sup> calcd for 416.1412, found 416.1417.

**11b-(2-(4-bromophenyl)-2-oxoethyl)-5,6a-dimethyl-5,6a,7,11b-tetrahydro-6H-ind**

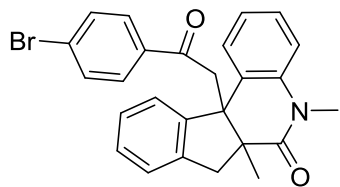

**eno[2,1-c]quinolin-6-one (3ah)** : by silica gel column chromatography (hexane/ethyl acetate = 12:1), yield: 60.7 mg, 66%; white solid; mp 148.0-148.5 °C (uncorrected) ; <sup>1</sup>H NMR (400 MHz, CDCl<sub>3</sub>) δ:

7.66-7.61 (m, 3H), 7.48-7.46 (m, 2H), 7.36 (t, *J* = 8.0 Hz, 1H), 7.21-7.17 (m, 3H), 7.11-7.07 (m, 1H), 6.88-6.83 (m, 2H), 4.05 (d, *J* = 16.9 Hz, 1H), 3.47-3.42 (m, 4H), 3.17 (d, *J* = 15.2 Hz, 1H), 2.81 (d, *J* = 15.3 Hz, 1H), 1.31 (s, 3H); <sup>13</sup>C{<sup>1</sup>H}NMR (100 MHz, CDCl<sub>3</sub>) δ: 196.3, 173.3, 147.7, 140.8, 139.8, 135.4, 131.6, 129.5, 129.0, 128.1, 127.7, 127.2, 126.7, 126.0, 125.0, 123.8, 122.5, 114.4, 54.1, 52.3, 45.6, 44.9, 30.1, 18.9; HRMS (ESI-TOF) *m/z*: C<sub>26</sub>H<sub>23</sub>BrNO<sub>2</sub> (M + H)<sup>+</sup> calcd for 460.0907, found 460.0901.

**5,6a-dimethyl-11b-(2-oxo-2-phenylethyl)-5,6a,7,11b-tetrahydro-6H-indeno[2,1-c]**

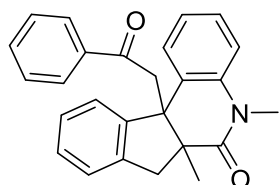

**quinolin-6-one (3ai)**: by silica gel column chromatography (hexane/ethyl acetate = 12:1), yield:49.5 mg, 65%; yellow solid; mp 165.6-166.1°C (uncorrected); <sup>1</sup>H NMR (400 MHz, CDCl<sub>3</sub>) δ: 7.82-7.79 (m, 2H), 7.64 (d, *J* = 7.6 Hz, 1H), 7.48

(t, *J* = 7.4 Hz, 1H), 7.35 (t, *J* = 7.8 Hz, 3H), 7.23-7.18 (m, 3H), 7.10-7.06 (m, 1H), 6.88-6.83 (m, 2H), 4.11 (d, *J* = 17.1 Hz, 1H), 3.51-3.47 (m, 4H), 3.19 (d, *J* = 15.2 Hz, 1H), 2.82 (d, *J* = 15.2 Hz, 1H), 1.32 (s, 3H); <sup>13</sup>C{<sup>1</sup>H}NMR (100 MHz, CDCl<sub>3</sub>) δ: 197.2, 173.5, 148.0, 140.9, 139.9, 136.8, 133.0, 129.1, 128.3, 128.0, 127.6, 127.2, 126.7, 126.2, 125.0, 123.9, 122.5, 114.4, 54.1, 52.4, 45.8, 45.0, 30.1, 18.9; HRMS (ESI-TOF) *m/z*: C<sub>26</sub>H<sub>24</sub>NO<sub>2</sub> (M + H)<sup>+</sup> calcd for 382.1802, found 382.1806.

**5,6a-dimethyl-11b-(2-oxo-2-(4-(trifluoromethyl)phenyl)ethyl)-5,6a,7,11b-tetrahy**

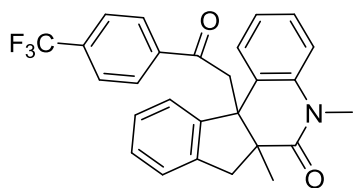

**dro-6H-indeno[2,1-c]quinolin-6-one (3aj)**: by silica gel column chromatography (hexane/ethyl acetate = 12:1), yield:54.8 mg, 61%; yellow oil; <sup>1</sup>H NMR (400 MHz, CDCl<sub>3</sub>) δ: 7.87 (d, *J* = 8.1 Hz, 2H), 7.65-7.59 (m,

3H), 7.29-7.26 (m, 1H), 7.22-7.18 (m, 3H), 7.11-7.06 (m, 1H), 6.88-6.84 (m, 2H),

4.11 (d,  $J = 16.9$  Hz, 1H), 3.49 (d,  $J = 18.1$  Hz, 4H), 3.18 (d,  $J = 15.2$  Hz, 1H), 2.82 (d,  $J = 15.2$  Hz, 1H), 1.33 (s, 3H);  $^{19}\text{F}$  NMR (282 MHz,  $\text{CDCl}_3$ )  $\delta$ : -63.1 (s, 3F);  $^{13}\text{C}\{^1\text{H}\}$ NMR (100 MHz,  $\text{CDCl}_3$ )  $\delta$ : 196.6, 173.3, 147.6, 140.8, 139.8, 139.4, 129.0, 128.3(q,  $J_{\text{C-F}} = 8.1$  Hz, 1C), 127.9, 127.7, 127.3, 126.7, 125.8, 125.5, 125.3(q,  $J_{\text{C-F}} = 3.5$  Hz, 1C), 125.0, 123.8, 122.6(q,  $J_{\text{C-F}} = 250.1$  Hz, 1C), 114.4, 54.1, 52.3, 45.9, 44.9, 30.1, 18.9; HRMS (ESI-TOF)  $m/z$ :  $\text{C}_{27}\text{H}_{23}\text{F}_3\text{NO}_2(\text{M} + \text{H})^+$  calcd for 450.1675, found 450.1679.

**11b-(2-(3-methoxyphenyl)-2-oxoethyl)-5,6a-dimethyl-5,6a,7,11b-tetrahydro-6H-i**

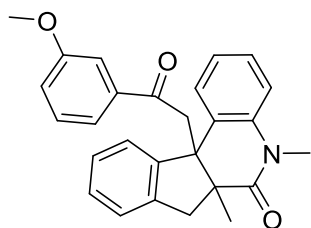

**ndeno[2,1-c]quinolin-6-one (3ak):** by silica gel column chromatography (hexane/ethyl acetate = 12:1), yield:56.7 mg, 69%; white solid; mp 155.5-156.0°C (uncorrected);  $^1\text{H}$  NMR (400 MHz,  $\text{CDCl}_3$ )  $\delta$ : 7.63 (d,  $J = 7.6$  Hz, 1H), 7.42

(d,  $J = 7.8$  Hz, 1H), 7.36-7.32 (m, 2H), 7.25-7.19 (m, 4H), 7.11-7.07 (m, 1H), 7.04-7.02 (m, 1H), 6.91-6.84 (m, 2H), 4.14-4.09 (m, 1H), 3.79 (s, 3H), 3.52-3.47 (m, 4H), 3.19 (d,  $J = 15.3$  Hz, 1H), 2.82 (d,  $J = 15.2$  Hz, 1H), 1.30 (s, 3H);  $^{13}\text{C}\{^1\text{H}\}$ NMR (100 MHz,  $\text{CDCl}_3$ )  $\delta$ : 196.9, 173.6, 159.6, 148.0, 140.8, 140.0, 138.0, 129.2, 129.0, 127.5, 127.2, 126.7, 126.1, 124.9, 123.9, 122.5, 120.6, 119.7, 114.4, 112.0, 55.4, 54.0, 52.3, 46.1, 45.0, 30.1, 18.9; HRMS (ESI-TOF)  $m/z$ :  $\text{C}_{27}\text{H}_{26}\text{NO}_3(\text{M} + \text{H})^+$  calcd for 412.1907, found 412.1901.

**11b-(2-(3-chlorophenyl)-2-oxoethyl)-5,6a-dimethyl-5,6a,7,11b-tetrahydro-6H-ind**

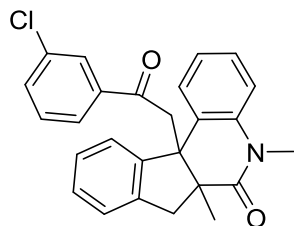

**eno[2,1-c]quinolin-6-one (3al):** by silica gel column chromatography (hexane/ethyl acetate = 12:1), yield:52.3 mg, 63%; white solid; mp 168.5-168.0°C (uncorrected);  $^1\text{H}$  NMR (400 MHz,  $\text{CDCl}_3$ )  $\delta$ : 7.72 (s, 1H), 7.65 (t,  $J = 7.6$  Hz,

2H), 7.44-7.42 (m, 1H), 7.37-7.33 (m, 1H), 7.29 (d,  $J = 7.9$  Hz, 1H), 7.24-7.16 (m, 3H), 7.10-7.06 (m, 1H), 6.88-6.84 (m, 2H), 4.03 (d,  $J = 16.9$  Hz, 1H), 3.46 (d,  $J = 15.4$  Hz, 4H), 3.17 (d,  $J = 15.2$  Hz, 1H), 2.81 (d,  $J = 15.2$  Hz, 1H), 1.32 (s, 3H);  $^{13}\text{C}\{^1\text{H}\}$ NMR (100 MHz,  $\text{CDCl}_3$ )  $\delta$ : 196.2, 173.3, 147.7, 140.8, 139.8, 138.2, 134.6, 132.8, 129.6, 129.0, 128.1, 127.7, 127.3, 126.7, 126.0, 125.8, 125.0, 123.9, 122.6,

114.4, 54.1, 52.4, 45.7, 44.8, 30.1, 18.9; HRMS (ESI-TOF)  $m/z$ :  $C_{26}H_{23}ClNO_2$  ( $M + H$ )<sup>+</sup> calcd for 416.1412, found 416.1418.

**5,6a-dimethyl-11b-(2-oxo-2-(o-tolyl)ethyl)-5,6a,7,11b-tetrahydro-6H-indeno[2,1-c]**

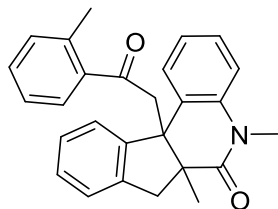

**quinolin-6-one (3am)**: by silica gel column chromatography (hexane/ethyl acetate = 12:1), yield:44.2 mg, 56%; white solid; mp 171.0-171.5°C (uncorrected); <sup>1</sup>H NMR (400 MHz, CDCl<sub>3</sub>) δ: 7.55 (d,  $J = 7.5$  Hz, 1H),

7.34-7.31 (m, 3H), 7.28-7.24 (m, 1H), 7.20-7.18 (m, 3H), 7.13 (s, 1H), 7.11 (s, 1H), 6.91-6.85 (m, 2H), 4.03 (d,  $J = 17.2$  Hz, 1H), 3.48 (s, 3H), 3.36 (d,  $J = 17.1$  Hz, 1H), 3.18 (d,  $J = 15.3$  Hz, 1H), 2.83 (d,  $J = 15.2$  Hz, 1H), 2.21 (s, 3H), 1.37 (s, 3H); <sup>13</sup>C{<sup>1</sup>H}NMR (100 MHz, CDCl<sub>3</sub>) δ: 201.7, 173.4, 147.8, 140.8, 139.8, 138.4, 137.4, 131.6, 130.9, 129.0, 128.2, 127.6, 127.1, 126.6, 126.1, 125.3, 124.9, 123.9, 122.4, 114.4, 54.4, 52.3, 48.8, 45.0, 30.0, 20.6, 19.0; HRMS (ESI-TOF)  $m/z$ :  $C_{27}H_{26}NO_2$  ( $M + H$ )<sup>+</sup> calcd for 396.1958, found 396.1966.

**11b-(2-(2-chlorophenyl)-2-oxoethyl)-5,6a-dimethyl-5,6a,7,11b-tetrahydro-6H-indeno[2,1-c]quinolin-6-one (3an)**

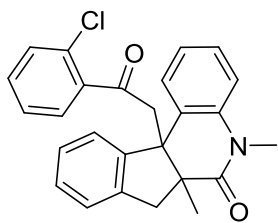

**eno[2,1-c]quinolin-6-one (3an)**: by silica gel column chromatography (hexane/ethyl acetate = 12:1), yield:44.2 mg, 49%; white solid; mp 165.0-165.5°C (uncorrected); <sup>1</sup>H NMR (400 MHz, CDCl<sub>3</sub>) δ: 7.53 (d,  $J = 7.6$  Hz, 1H), 7.31-7.28 (m,

3H), 7.20-7.12 (m, 5H), 7.02 (t,  $J = 6.8$  Hz, 1H), 6.94 (d,  $J = 8.3$  Hz, 1H), 6.87 (t,  $J = 7.5$  Hz, 1H), 4.15(d,  $J = 17.6$  Hz, 1H), 3.52 (s, 3H), 3.43 (d,  $J = 17.5$  Hz, 1H), 3.20 (d,  $J = 15.3$  Hz, 1H), 2.83 (d,  $J = 15.3$  Hz, 1H), 1.37 (s, 3H); <sup>13</sup>C{<sup>1</sup>H}NMR (100 MHz, CDCl<sub>3</sub>) δ: 200.7 , 173.3, 147.5 , 140.7 , 139.7 139.6 , 131.5 , 130.3, 130.2 , 129.3 , 128.5 , 127.7 , 127.2 , 126.8 , 126.7 , 125.6 , 124.9 , 123.9 , 122.5 , 114.4 , 54.4 , 52.4 , 50.0 , 45.0 , 30.1 , 19.1 ; HRMS (ESI-TOF)  $m/z$ :  $C_{26}H_{23}ClNO_2$  ( $M + H$ )<sup>+</sup> calcd for 416.1412, found 416.1417.

**5,6a-dimethyl-11b-(2-oxo-2-(thiophen-2-yl)ethyl)-5,6a,7,11b-tetrahydro-6H-indeno[2,1-c]quinolin-6-one (3ao)**

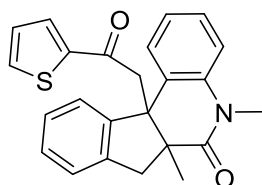

**no[2,1-c]quinolin-6-one (3ao)**: by silica gel column chromatography (hexane/ethyl acetate = 12:1), yield:42.6 mg,

55%; white solid; mp 135.0-135.5°C (uncorrected); <sup>1</sup>H NMR (400 MHz, CDCl<sub>3</sub>) δ: 7.63 (d, *J* = 7.2 Hz, 1H), 7.52 (d, *J* = 5.2 Hz, 1H), 7.46 (t, *J* = 8.0 Hz, 1H), 7.35 (t, *J* = 6.8 Hz, 1H), 7.22-7.16 (m, 3H), 7.10-7.07 (t, *J* = 7.6 Hz, 1H), 7.00-6.96 (m, 1H), 6.87 (t, *J* = 6.0 Hz, 2H), 3.96-3.92 (m, 1H), 3.45 (d, *J* = 16.8 Hz, 4H), 3.15 (d, *J* = 16.8 Hz, 1H), 2.83-2.79 (m, 1H), 1.38 (s, 3H); <sup>13</sup>C{<sup>1</sup>H}NMR (100 MHz, CDCl<sub>3</sub>) δ: 190.0, 173.2, 147.6, 144.2, 140.9, 139.7, 133.6, 131.9, 129.1, 127.8, 127.7, 127.2, 126.7, 126.0, 125.0, 123.9, 122.6, 114.4, 54.3, 52.6, 46.1, 44.7, 30.1, 19.0; HRMS (ESI-TOF) *m/z*: C<sub>24</sub>H<sub>22</sub>NO<sub>2</sub>S (M + H)<sup>+</sup> calcd for 388.1366, found 388.1370.

**5,6a-dimethyl-11b-(2-(naphthalen-2-yl)-2-oxoethyl)-5,6a,7,11b-tetrahydro-6H-indeno[2,1-c]quinolin-6-one (3ap):**

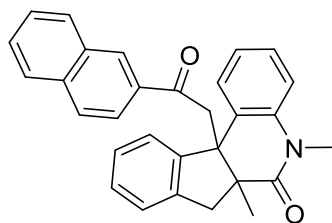

**deno[2,1-c]quinolin-6-one (3ap):** by silica gel column chromatography (hexane/ethyl acetate = 12:1), yield:60.3 mg, 70%; white solid; mp 185.0-185.5°C (uncorrected);

<sup>1</sup>H NMR (400 MHz, CDCl<sub>3</sub>) δ: 8.27 (s, 1H), 7.89-7.85 (m, 2H), 7.81-7.78 (m, 2H), 7.71 (d, *J* = 7.4 Hz, 1H), 7.57-7.50 (m, 3H), 7.39 (t, *J* = 6.9 Hz, 1H), 7.25-7.18 (m, 2H), 7.04-7.00 (m, 1H), 6.87-6.81 (m, 2H), 4.23 (d, *J* = 16.9 Hz, 1H), 3.62 (d, *J* = 16.8 Hz, 1H), 3.48 (s, 3H), 3.20 (d, *J* = 15.2 Hz, 1H), 2.83 (d, *J* = 15.2 Hz, 1H), 1.36 (s, 3H); <sup>13</sup>C{<sup>1</sup>H}NMR (100 MHz, CDCl<sub>3</sub>) δ: 197.2, 173.5, 148.0, 140.9, 139.9, 135.3, 134.0, 132.2, 129.6, 129.4, 129.1, 128.4, 128.1, 127.6, 127.6, 127.2, 126.7, 126.6, 126.2, 124.9, 124.0, 123.7, 122.5, 114.4, 54.2, 52.4, 45.8, 44.9, 30.1, 18.9; HRMS (ESI-TOF) *m/z*: C<sub>30</sub>H<sub>26</sub>NO<sub>2</sub> (M + H)<sup>+</sup> calcd for 432.1958, found 432.1963.

**5,6a-dimethyl-11b-(2-oxobutyl)-5,6a,7,11b-tetrahydro-6H-indeno[2,1-c]quinolin-**

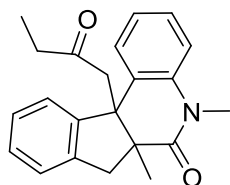

**6-one (3aq):** by silica gel column chromatography (hexane/ethyl acetate = 12:1), yield:48.6 mg, 73%; white solid; mp

137.0-137.5°C (uncorrected); <sup>1</sup>H NMR (400 MHz, CDCl<sub>3</sub>) δ: 7.52 (d, *J* = 7.5 Hz, 1H), 7.31-7.27 (m, 1H), 7.20-7.13 (m, 4H), 6.96-6.88 (m, 2H), 3.48 (s, 3H), 3.41 (d, *J* = 16.5 Hz, 1H), 3.14 (d, *J* = 15.2 Hz, 1H), 2.97 (d, *J* = 16.4 Hz, 1H), 2.78 (d, *J* = 15.2 Hz, 1H), 2.31-2.21 (m, 1H), 2.07-1.99 (m, 1H), 1.28 (s, 3H), 0.84 (t, *J* = 7.3 Hz, 3H); <sup>13</sup>C{<sup>1</sup>H}NMR (100 MHz, CDCl<sub>3</sub>) δ: 208.4,

173.2, 147.6, 140.8, 139.6, 129.0, 127.6, 127.1, 126.6, 126.0, 124.9, 123.9, 122.5, 114.4, 53.91, 52.30, 48.93, 44.72, 36.91, 30.06, 18.89, 7.57; HRMS (ESI-TOF)  $m/z$ :  $C_{22}H_{24}NO_2$  ( $M + H$ )<sup>+</sup> calcd for 334.1802, found 334.1806.

**5,6a-dimethyl-11b-(2-oxopentyl)-5,6a,7,11b-tetrahydro-6H-indeno[2,1-c]quinolin**

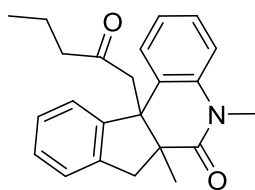

**-6-one (3ar)**: by silica gel column chromatography (hexane/ethyl acetate = 12:1), yield:47.9 mg, 69%; white solid; mp 148.0-148.5°C (uncorrected); <sup>1</sup>H NMR (400 MHz, CDCl<sub>3</sub>) δ: 7.50 (d,  $J = 7.6$  Hz, 1H), 7.31-7.29 (m, 1H), 7.19-7.14 (m, 4H), 6.96-6.88 (m, 2H), 3.48 (s, 3H), 3.44 (t,  $J = 16.6$  Hz, 4H), 3.14 (d,  $J = 15.3$  Hz, 1H), 2.95 (d,  $J = 16.6$  Hz, 1H), 2.79 (d,  $J = 15.2$  Hz, 1H), 2.24-2.16 (m, 1H), 2.05-1.98 (m, 1H), 1.40-1.36 (m, 2H), 1.28 (s, 3H), 0.71 (t,  $J = 7.4$  Hz, 3H); <sup>13</sup>C{<sup>1</sup>H}NMR (100 MHz, CDCl<sub>3</sub>) δ: 208.1, 173.3, 147.7, 140.8, 139.7, 129.1, 127.7, 127.2, 126.6, 126.0, 125.0, 123.9, 122.6, 114.5, 54.0, 52.3, 49.3, 45.8, 44.9, 30.1, 19.0, 17.0, 13.5; HRMS (ESI-TOF)  $m/z$ :  $C_{23}H_{26}NO_2$  ( $M + H$ )<sup>+</sup> calcd for 348.1958, found 348.1962.

**5,6a-dimethyl-11b-(2-oxo-4-phenylbutyl)-5,6a,7,11b-tetrahydro-6H-indeno[2,1-c]**

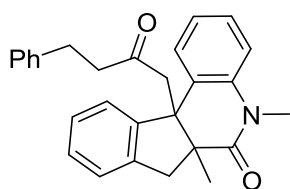

**quinolin-6-one (3as)**: by silica gel column chromatography (hexane/ethyl acetate = 12:1), yield:54.8 mg, 67%; white solid; mp 130.7-131.2°C (uncorrected); <sup>1</sup>H NMR (400 MHz, CDCl<sub>3</sub>) δ: 7.46 (d,  $J = 7.5$  Hz, 1H), 7.29-7.25 (m, 1H), 7.22-7.11 (m, 7H), 6.97-6.89 (m, 4H), 3.41 (t,  $J = 16.4$  Hz, 4H), 3.13 (d,  $J = 15.2$  Hz, 1H), 2.92 (d,  $J = 16.4$  Hz, 1H), 2.77 (d,  $J = 15.2$  Hz, 1H), 2.69-2.62 (m, 2H), 2.58-2.50 (m, 1H), 2.37-2.29 (m, 1H), 1.27 (s, 3H); <sup>13</sup>C{<sup>1</sup>H}NMR (100 MHz, CDCl<sub>3</sub>) δ: 207.0, 173.1, 147.4, 140.7(2C), 139.5, 129.0, 128.3, 128.1, 127.7, 127.1, 126.6, 125.9, 125.8, 124.9, 123.8, 122.6, 114.5, 53.9, 52.3, 49.4, 45.3, 44.7, 30.0, 29.4, 18.9; HRMS (ESI-TOF)  $m/z$ :  $C_{28}H_{28}NO_2$  ( $M + H$ )<sup>+</sup> calcd for 410.2115, found 410.2119.

**5,6a-dimethyl-11b-(3-methyl-2-oxobutyl)-5,6a,7,11b-tetrahydro-6H-indeno[2,1-c]**

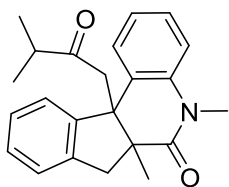

**quinolin-6-one (3au):** by silica gel column chromatography

(hexane/ethyl acetate = 12 : 1), yield:6.9 mg, 10%; white solid;

mp 125.0-125.5°C (uncorrected); <sup>1</sup>H NMR (400 MHz, CDCl<sub>3</sub>) δ:

7.52 (d, *J* = 7.6 Hz, 1H), 7.28 (s, 1H), 7.19-7.13 (m, 4H),

6.95-6.87 (m, 2H), 3.53 (t, *J* = 24.2 Hz, 4H), 3.14 (d, *J* = 15.2 Hz, 1H), 3.00 (d, *J* =

16.9 Hz, 1H), 2.79 (d, *J* = 15.3 Hz, 1H), 2.35-2.29 (m, 1H), 1.28 (s, 3H), 0.94 (d, *J* =

6.9 Hz, 3H), 0.79 (d, *J* = 6.9 Hz, 3H); <sup>13</sup>C{<sup>1</sup>H}NMR (100 MHz, CDCl<sub>3</sub>) δ:

211.5, 173.3, 147.8, 140.9, 139.7, 129.1, 128.2, 127.6, 127.1, 126.6, 124.9, 123.9, 122.4,

114.4, 53.9, 52.3, 47.3, 44.9, 41.4, 30.0, 18.9, 18.1, 17.6; HRMS (ESI-TOF) *m/z*:

C<sub>23</sub>H<sub>26</sub>NO<sub>2</sub> (M + H)<sup>+</sup> calcd for 348.1958, found 348.1963.

**11b-isobutyl-5,6a-dimethyl-5,6a,7,11b-tetrahydro-6H-indeno[2,1-c]quinolin-6-on**

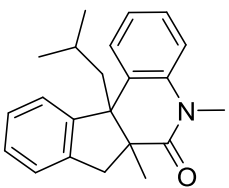

**e (4au):** by silica gel column chromatography (hexane/ethyl

acetate = 12 : 1), yield:35.1 mg, 55%; white solid; mp

138.0-138.5°C (uncorrected); <sup>1</sup>H NMR (400 MHz, CDCl<sub>3</sub>) δ:

7.45 (d, *J* = 7.5 Hz, 1H), 7.29-7.27 (m, 1H), 7.18-7.14 (m, 3H),

7.10 (d, *J* = 7.4 Hz, 1H), 6.95-6.90 (m, 2H), 3.45 (s, 3H), 3.09 (d, *J* = 15.0 Hz, 1H),

2.71 (d, *J* = 15.0 Hz, 1H), 2.03-1.97 (m, 1H), 1.90-1.85 (m, 1H), 1.27 (s, 3H), 0.96 (s,

1H), 0.82 (d, *J* = 6.7 Hz, 3H), 0.36 (d, *J* = 6.4 Hz, 3H); <sup>13</sup>C{<sup>1</sup>H}NMR (100 MHz,

CDCl<sub>3</sub>) δ: 174.0, 149.1, 141.0, 139.4, 129.6, 128.1, 127.3, 126.6, 126.4, 124.7, 124.0,

123.0, 113.9, 55.8, 52.7, 45.8, 44.4, 30.0, 25.7, 24.7, 23.3, 18.4; HRMS (ESI-TOF)

*m/z*: C<sub>22</sub>H<sub>26</sub>NO (M + H)<sup>+</sup> calcd for 320.2009, found 320.2002.

**11b-(cyclopentylmethyl)-5,6a-dimethyl-5,6a,7,11b-tetrahydro-6H-indeno[2,1-c]q**

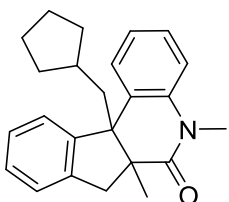

**uinolin-6-one (4av):** by silica gel column chromatography

(hexane/ethyl acetate = 12:1), yield:54.0 mg, 78%; white solid;

mp 129.0-129.5°C (uncorrected); <sup>1</sup>H NMR (400 MHz, CDCl<sub>3</sub>) δ:

7.46 (d, *J* = 7.5 Hz, 1H), 7.30-7.27 (m, 1H), 7.19-7.14 (m, 3H),

7.10-7.08 (m, 1H), 6.95-6.89 (m, 2H), 3.4 (s, 3H), 3.1 (d, *J* = 14.9 Hz, 1H), 2.7 (d, *J* =

14.9 Hz, 1H), 2.1 (d, *J* = 5.5 Hz, 2H), 1.7-1.7 (m, 2H), 1.5-1.2 (m, 10H);

$^{13}\text{C}\{^1\text{H}\}$ NMR (100 MHz,  $\text{CDCl}_3$ )  $\delta$ : 174.0 , 149.0 , 141.1 , 139.5 , 129.6 , 128.2 , 127.3 , 126.6 , 126.4 , 124.7 , 124.0 , 122.9 , 113.9 , 55.9 , 52.4 , 44.4 , 43.5 , 36.3 , 35.5 , 32.5 , 30.0 , 25.6 , 24.4 , 18.3; HRMS (ESI-TOF)  $m/z$ :  $\text{C}_{24}\text{H}_{28}\text{NO}$  ( $\text{M} + \text{H}$ ) $^+$  calcd for 346.2166, found 346.2172.

**11b-(cyclohexylmethyl)-5,6a-dimethyl-5,6a,7,11b-tetrahydro-6H-indeno[2,1-c]quinolin-6-one (4aw):**

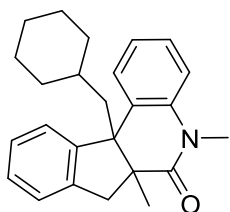

by silica gel column chromatography (hexane/ethyl acetate = 12 : 1), yield:54.0 mg, 78%; white solid; mp 136.7-138.4°C (uncorrected);  $^1\text{H}$  NMR (400 MHz,  $\text{CDCl}_3$ )  $\delta$ : 7.47 (d,  $J$  = 7.5 Hz, 1H), 7.32 (t,  $J$  = 7.4 Hz, 1H), 7.22-7.16 (m, 3H), 7.05 (d,  $J$  = 7.8 Hz, 1H), 6.97-6.91 (m, 2H), 3.65-3.61 (m, 1H), 3.48 (s, 3H), 3.10 (d,  $J$  = 15.0 Hz, 1H), 2.73 (d,  $J$  = 15.3 Hz, 2H), 2.57-2.31 (m, 1H), 2.37-2.31 (m, 1H), 1.93 (d,  $J$  = 13.6 Hz, 2H), 1.77 (t,  $J$  = 15.0 Hz, 2H), 1.65 (d,  $J$  = 9.6 Hz, 2H), 1.50-1.41 (m, 3H), 1.31 (s, 3H);  $^{13}\text{C}\{^1\text{H}\}$ NMR (100 MHz,  $\text{CDCl}_3$ )  $\delta$ : 182.3 , 173.1, 147.8, 141.0 , 139.9 , 129.6 , 127.8 , 127.0 , 126.7 , 125.1 , 123.7 , 123.2 , 114.2 , 56.2 , 54.4, 52.5 , 49.3 , 44.2 , 42.8 , 41.7 , 30.4 , 28.7 , 25.6 , 25.3 , 18.4; HRMS (ESI-TOF)  $m/z$ :  $\text{C}_{25}\text{H}_{30}\text{NO}$  ( $\text{M} + \text{H}$ ) $^+$  calcd for 360.2322, found 360.2328.

**5,6a-dimethyl-11b-neopentyl-5,6a,7,11b-tetrahydro-6H-indeno[2,1-c]quinolin-6-one (4ax):**

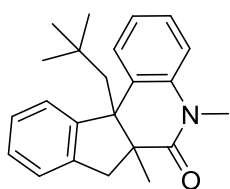

by silica gel column chromatography (hexane/ethyl acetate = 12:1), yield:45.3 mg, 68%; white solid; mp 133.0-133.5°C (uncorrected);  $^1\text{H}$  NMR (400 MHz,  $\text{CDCl}_3$ )  $\delta$ : 7.55 (d,  $J$  = 7.6 Hz, 1H), 7.31-7.27 (d,  $J$  = 7.7 Hz, 1H), 7.15 (t,  $J$  = 7.2 Hz, 3H), 7.06-7.04 (m, 1H), 6.95-6.93 (m, 1H), 6.90-6.86 (m, 1H), 3.47 (s, 3H), 3.08 (d,  $J$  = 15.0 Hz, 1H), 2.71 (d,  $J$  = 15.0 Hz, 1H), 2.28 (d,  $J$  = 15.0 Hz, 1H), 1.96 (d,  $J$  = 15.0 Hz, 1H), 1.33 (s, 3H), 0.68 (s, 9H);  $^{13}\text{C}\{^1\text{H}\}$ NMR (100 MHz,  $\text{CDCl}_3$ )  $\delta$ : 174.1 , 150.2 , 140.7 , 139.4 , 130.5 , 127.5 , 127.3 , 126.6 , 126.3 , 124.7 , 124.0 , 122.8 , 114.1 , 56.4 , 52.9 , 48.7 , 45.4 , 31.8 , 31.4 , 30.0 , 18.9; HRMS (ESI-TOF)  $m/z$ :  $\text{C}_{23}\text{H}_{28}\text{NO}$  ( $\text{M} + \text{H}$ ) $^+$  calcd for 334.2166, found 334.2172.



**5,6a-dimethyl-11b-phenethyl-5,6a,7,11b-tetrahydro-6H-indeno[2,1-c]quinolin-6-**

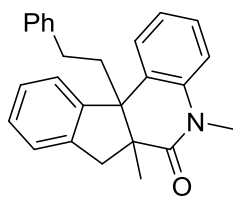

**one (4ay):** by silica gel column chromatography (hexane/ethyl acetate = 12:1), yield:49.2 mg, 67%; white solid; mp 143.0-143.5°C (uncorrected); <sup>1</sup>H NMR (400 MHz, CDCl<sub>3</sub>) δ: 7.45 (d, *J* = 7.5 Hz, 1H), 7.26-7.20 (m, 4H), 7.15 (d, *J* = 9.5 Hz, 4H), 7.04-6.96 (m, 4H), 3.48 (s, 3H), 3.08 (d, *J* = 14.9 Hz, 1H), 2.74 (d, *J* = 15.0 Hz, 1H), 2.59-2.50 (m, 1H), 2.41-2.33 (m, 1H), 2.24-2.14 (m, 2H), 1.39 (s, 3H); <sup>13</sup>C{<sup>1</sup>H}NMR (100 MHz, CDCl<sub>3</sub>) δ: 173.8 , 148.2 , 141.8 , 141.1 , 139.5 , 129.2 , 128.3 , 128.1 , 127.5 , 127.1, 126.8 , 126.5 , 125.9 , 124.8 , 123.9 , 123.3 , 113.9 , 55.8 , 52.0 , 44.4 , 39.8 , 30.1 , 29.8 , 18.2; HRMS (ESI-TOF) *m/z*: C<sub>26</sub>H<sub>26</sub>NO (M + H)<sup>+</sup> calcd for 368.2009, found 368.2014.

**11b-(2-(4-methoxyphenyl)-2-oxoethyl)-2,5,6a-trimethyl-5,6a,7,11b-tetrahydro-6H**

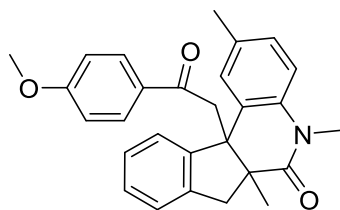

**-indeno[2,1-c]quinolin-6-one (3ba):** by silica gel column chromatography (hexane/ethyl acetate = 12:1), yield: 66.2 mg, 78%; white solid; mp 155.0-155.5 °C (uncorrected); <sup>1</sup>H NMR (400 MHz, CDCl<sub>3</sub>) δ: 7.80 (d, *J* = 8.8 Hz, 2H), 7.64 (d, *J* = 7.6 Hz, 1H), 7.34 (t, *J* = 6.4 Hz, 1H), 7.22-7.17 (m, 2H), 6.96 (s, 1H), 6.88-6.86 (m, 1H), 6.82-6.76 (m, 3H), 4.04 (d, *J* = 16.8 Hz, 1H), 3.81 (s, 3H), 3.45 (d, *J* = 22 Hz, 4H), 3.18 (d, *J* = 15.2 Hz, 1H), 2.80 (d, *J* = 15.2 Hz, 1H), 2.13 (s, 3H), 1.29 (s, 3H); <sup>13</sup>C{<sup>1</sup>H}NMR (100 MHz, CDCl<sub>3</sub>) δ: 195.5, 173.3, 163.2 , 148.2, 140.8, 137.6, 131.5, 130.2, 129.8 , 129.4, 128.1, 127.0, 126.6, 126.0, 124.8, 123.9 , 114.3 , 113.3 , 55.3, 54.0, 52.3, 45.5, 44.9, 30.1, 20.6, 18.8; HRMS (ESI-TOF) *m/z*: C<sub>28</sub>H<sub>28</sub>NO<sub>3</sub> (M + H)<sup>+</sup> calcd for 426.2064, found 426.2069.

**2-ethyl-11b-(2-(4-methoxyphenyl)-2-oxoethyl)-5,6a-dimethyl-5,6a,7,11b-tetrahydro-**

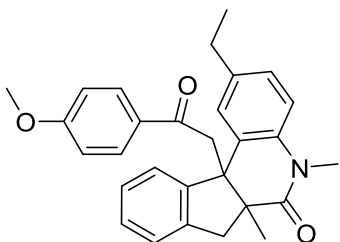

**ro-6H-indeno[2,1-c]quinolin-6-one (3ca):** by silica gel column chromatography (hexane/ethyl acetate = 12:1), yield: 60.6 mg, 69%; white solid; mp 141.0-141.5 °C (uncorrected); <sup>1</sup>H NMR (400 MHz, CDCl<sub>3</sub>) δ: 7.75 (d, *J* = 8.8 Hz, 2H), 7.65 (d, *J* = 7.5 Hz, 1H), 7.36-7.32 (m, 1H), 7.21-7.16 (m, 2H), 6.95 (d,

$J = 2.0$  Hz, 1H), 6.90-6.88(m, 1H), 6.78 (t,  $J = 8.8$  Hz, 3H), 4.03 (d,  $J = 16.8$  Hz, 1H), 3.80 (s, 3H), 3.44 (t,  $J = 7.2$  Hz, 4H), 3.16 (d,  $J = 15.2$  Hz, 1H), 2.79 (d,  $J = 15.2$  Hz, 1H), 2.46-2.41 (m, 2H), 1.3 (s, 3H), 1.08 (t,  $J = 7.6$  Hz, 3H);  $^{13}\text{C}\{^1\text{H}\}$ NMR (100 MHz,  $\text{CDCl}_3$ )  $\delta$ : 195.7, 173.3, 163.2, 148.2, 140.9, 138.0, 137.7, 130.2, 129.9, 128.4, 127.0, 126.8, 126.6, 126.0, 124.9, 123.9, 114.3, 113.3, 55.4, 54.2, 52.4, 45.2, 44.9, 30.1, 27.9, 18.9, 15.3; HRMS (ESI-TOF)  $m/z$ :  $\text{C}_{29}\text{H}_{30}\text{NO}_3$  ( $\text{M} + \text{H}$ ) $^+$  calcd for 440.2220, found 440.2223.

**2-isopropyl-11b-(2-(4-methoxyphenyl)-2-oxoethyl)-5,6a-dimethyl-5,6a,7,11b-tetra**

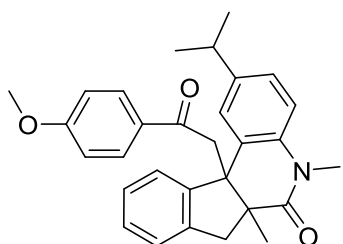

**hydro-6H-indeno[2,1-c]quinolin-6-one (3da):** by

silica gel column chromatography (hexane/ethyl acetate = 12:1), yield: 58.9 mg, 65%; white solid; mp 143.0-143.5 °C (uncorrected);  $^1\text{H}$  NMR (400 MHz,

$\text{CDCl}_3$ )  $\delta$ : 7.77-7.74 (m, 2H), 7.66 (d,  $J = 7.6$  Hz, 1H), 7.36-7.32 (m, 1H), 7.22-7.18 (m, 2H), 7.01 (d,  $J = 2.2$  Hz, 1H), 6.93-6.90 (m, 1H), 6.80-6.75 (m, 3H), 4.01 (d,  $J = 16.4$  Hz, 1H), 3.81 (s, 3H), 3.44-3.38 (m, 4H), 3.16 (d,  $J = 15.1$  Hz, 1H), 2.79 (d,  $J = 15.3$  Hz, 1H), 2.73-2.66 (m, 1H), 1.3 (s, 3H), 1.08 (t,  $J = 6.8$  Hz, 6H);  $^{13}\text{C}\{^1\text{H}\}$ NMR (100 MHz,  $\text{CDCl}_3$ )  $\delta$ : 195.9, 173.3, 163.2, 148.1, 142.6, 140.9, 137.7, 130.2, 130.0, 127.2, 127.0, 126.5, 125.9, 125.1, 124.9, 123.9, 114.2, 113.3, 55.4, 54.3, 52.5, 45.0, 44.8, 33.1, 30.0, 23.9, 23.8, 18.9; HRMS (ESI-TOF)  $m/z$ :  $\text{C}_{30}\text{H}_{32}\text{NO}_3$  ( $\text{M} + \text{H}$ ) $^+$  calcd for 454.2377, found 454.2371.

**2-(tert-butyl)-11b-(2-(4-methoxyphenyl)-2-oxoethyl)-5,6a-dimethyl-5,6a,7,11b-tet**

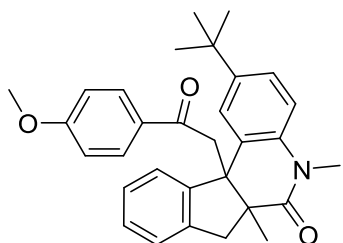

**rahydro-6H-indeno[2,1-c]quinolin-6-one (3ea):** by

silica gel column chromatography (hexane/ethyl acetate = 12:1), yield: 57.9 mg, 62%; white solid; mp 123.0-123.5 °C (uncorrected);  $^1\text{H}$  NMR (400 MHz,

$\text{CDCl}_3$ )  $\delta$ : 7.74 (d,  $J = 7.4$  Hz, 2H), 7.66 (d,  $J = 7.5$  Hz, 1H), 7.34 (t,  $J = 7.1$  Hz, 1H), 7.18 (d,  $J = 7.3$  Hz, 3H), 7.05 (d,  $J = 8.7$  Hz, 1H), 6.76 (m, 3H), 4.00 (d,  $J = 16.3$  Hz, 1H), 3.80 (s, 3H), 3.44-3.38 (m, 4H), 3.16 (d,  $J = 15.3$  Hz, 1H), 2.80 (d,  $J = 15.2$  Hz, 1H), 1.35 (s, 3H), 1.14 (s, 9H);  $^{13}\text{C}\{^1\text{H}\}$ NMR (100 MHz,  $\text{CDCl}_3$ )  $\delta$ : 196.0, 173.3,

163.1 , 148.2 , 144.8 , 140.9 , 137.3 , 130.2 , 130.1 , 127.0 , 126.5 , 126.1 , 125.5, 124.9 , 124.3 , 123.8 , 113.8 , 113.3 , 55.4 , 54.5 , 52.5 , 44.8 , 34.0 , 31.2 , 29.9 , 19.0, 14.2; HRMS (ESI-TOF)  $m/z$ :  $C_{31}H_{34}NO_3$  ( $M + H$ )<sup>+</sup> calcd for 468.2533, found 468.2539.

**2-methoxy-11b-(2-(4-methoxyphenyl)-2-oxoethyl)-5,6a-dimethyl-5,6a,7,11b-tetra**

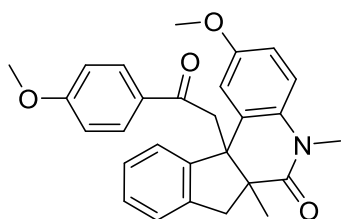

**hydro-6H-indeno[2,1-c]quinolin-6-one (3fa):** by silica gel column chromatography (hexane/ethyl acetate = 12:1), yield: 59.0 mg, 67%; white solid; mp 163.0-163.5 °C (uncorrected); <sup>1</sup>H NMR (400 MHz, CDCl<sub>3</sub>) δ: 7.40

(d,  $J = 8.8$  Hz, 2H), 7.24 (d,  $J = 8.0$  Hz, 2H), 7.19 (s, 1H), 7.00 (d,  $J = 9.0$  Hz, 1H), 6.87 (d,  $J = 8.8$  Hz, 2H), 6.55-6.76 (m, 1H), 6.55 (t,  $J = 3.0$  Hz, 2H), 3.87-3.80(m, 5H), 3.68 (s, 3H), 3.50 (s, 3H), 3.12-3.07 (m, 1H), 2.76 (d,  $J = 15.0$  Hz, 1H), 1.01 (s, 3H); <sup>13</sup>C{<sup>1</sup>H}NMR (100 MHz, CDCl<sub>3</sub>)δ: 172.7 , 159.4 , 155.4 , 142.8 , 142.3, 132.0, 131.9, 128.2, 128.1, 127.6, 127.0, 126.9, 126.8, 115.7, 115.3, 113.8 , 112.2 , 61.1 , 55.4 , 52.1 , 46.6 , 30.3 , 29.7 , 22.1 , 14.1 ; HRMS (ESI-TOF)  $m/z$ :  $C_{28}H_{28}NO_4$  ( $M + H$ )<sup>+</sup> calcd for 442.2013, found 442.2017.

**2-fluoro-11b-(2-(4-methoxyphenyl)-2-oxoethyl)-5,6a-dimethyl-5,6a,7,11b-tetrahy**

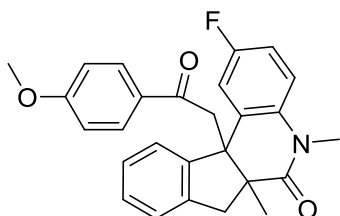

**dro-6H-indeno[2,1-c]quinolin-6-one (3ga):** by silica gel column chromatography (hexane/ethyl acetate = 12:1), yield: 64.4 mg, 75%; white solid; mp 176.0-176.5 °C (uncorrected); <sup>1</sup>H NMR (400 MHz,

CDCl<sub>3</sub>) δ: 7.83-7.81 (m, 2H), 7.61 (d,  $J = 7.6$  Hz, 1H), 7.38-7.34 (m, 1H), 7.23-7.21 (m, 2H), 6.92-6.88 (m, 1H), 6.85 (d,  $J = 2.0$  Hz, 1H), 6.84-6.82 (m, 2H), 6.80-6.77 (m, 1H), 4.03 (d,  $J = 17.2$  Hz, 1H), 3.82 (s, 3H), 3.49-3.44 (m, 4H), 3.17 (d,  $J = 15.3$  Hz, 1H), 2.82 (d,  $J = 15.3$  Hz, 1H), 1.3 (s, 3H); <sup>19</sup>F NMR (282 MHz, CDCl<sub>3</sub>) δ: -120.9 (s, 1F); <sup>13</sup>C{<sup>1</sup>H}NMR (100 MHz, CDCl<sub>3</sub>) δ: 195.3 , 173.1 , 163.4 , 158.1 (d,  $J_{C-F} = 239.8$  Hz, 1C), 147.5 , 140.7 , 136.3(d,  $J = 2.4$  Hz, 1C) , 130.2 , 129.6 , 128.4(d,  $J_{C-F} = 6.1$  Hz, 1C) , 127.4 , 126.9 , 124.9 , 123.7 , 115.6 (d,  $J_{C-F} = 6.7$  Hz, 1C), 115.5(d,  $J_{C-F} = 8.7$  Hz, 1C) , 114.1(d,  $J_{C-F} = 22.1$  Hz, 1C) , 113.4 , 55.4 , 54.1 , 52.0 , 45.3 , 44.9 ,

30.3 , 18.8 ; HRMS (ESI-TOF)  $m/z$ :  $C_{27}H_{25}FNO_3$  ( $M + H$ )<sup>+</sup> calcd for 430.1813, found 430.1818.

**2-chloro-11b-(2-(4-methoxyphenyl)-2-oxoethyl)-5,6a-dimethyl-5,6a,7,11b-tetrahy**

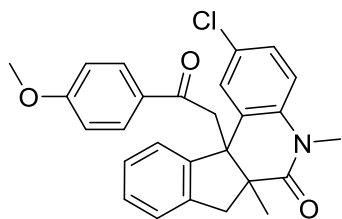

**dro-6H-indeno[2,1-c]quinolin-6-one (3ha):** by silica gel column chromatography (hexane/ethyl acetate = 12:1), yield: 53.4 mg, 60%; white solid; mp 174.0-174.5 °C (uncorrected); <sup>1</sup>H NMR (400 MHz, CDCl<sub>3</sub>) δ:

7.84-7.81 (m, 2H), 7.61 (d,  $J = 7.5$  Hz, 1H), 7.38-7.34 (m, 1H), 7.25-7.21 (m, 2H), 7.12 (d,  $J = 2.4$  Hz, 1H), 7.01-7.02(m, 1H), 6.86-6.81 (m, 3H), 4.03 (d,  $J = 17.3$  Hz, 1H), 3.83 (s, 3H), 3.48 (d,  $J = 16.8$  Hz, 4H), 3.17 (d,  $J = 15.3$  Hz, 1H), 2.81 (d,  $J = 15.3$  Hz, 1H), 1.28 (s, 3H); <sup>13</sup>C{<sup>1</sup>H}NMR (100 MHz, CDCl<sub>3</sub>) δ: 195.2 , 173.2 , 163.4 , 147.5 , 140.7 , 138.8 , 130.3 , 129.9, 129.5 , 128.9 , 128.3, 127.4 , 127.3 , 127.0 , 125.0 , 123.8 , 115.7 , 113.5 , 55.4 , 54.0 , 52.2 , 45.7 , 45.0 , 30.2 , 18.8; HRMS (ESI-TOF)  $m/z$ :  $C_{27}H_{25}ClNO_3$  ( $M + H$ )<sup>+</sup> calcd for 446.1517, found 446.1525.

**2-bromo-11b-(2-(4-methoxyphenyl)-2-oxoethyl)-5,6a-dimethyl-5,6a,7,11b-tetrahy**

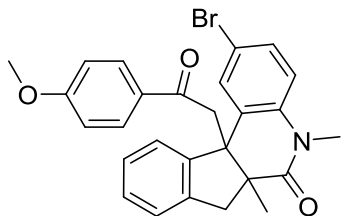

**dro-6H-indeno[2,1-c]quinolin-6-one (3ia):** by silica gel column chromatography (hexane/ethyl acetate = 12:1), yield: 67.6 mg, 69%; white solid; mp 177.6-178.4 °C (uncorrected); <sup>1</sup>H NMR (400 MHz, CDCl<sub>3</sub>) δ:

7.84-7.81 (m, 2H), 7.61 (d,  $J = 7.5$  Hz, 1H), 7.37 (t,  $J = 7.4$  Hz, 1H), 7.23-7.17 (m, 4H), 6.86-6.84 (m, 2H), 6.78-6.69 (m, 1H), 4.06-4.01 (m, 1H), 3.83 (d,  $J = 2.6$  Hz, 3H), 3.49-3.45 (m, 4H), 3.17 (d,  $J = 15.4$  Hz, 1H), 2.82 (d,  $J = 12.8$  Hz, 1H), 1.27 (s, 3H); <sup>13</sup>C{<sup>1</sup>H}NMR (100 MHz, CDCl<sub>3</sub>) δ: 195.3 , 173.2 , 163.4 , 147.4 , 140.7 , 139.3 , 131.7 , 130.4 , 130.3 , 129.5 , 128.7 , 127.4 , 127.0 , 125.0 , 123.8 , 116.1 , 114.8 , 113.5 , 55.4 , 54.0 , 52.2 , 45.7 , 45.0 , 30.2 , 18.8; HRMS (ESI-TOF)  $m/z$ :  $C_{27}H_{25}BrNO_3$  ( $M + H$ )<sup>+</sup> calcd for 490.1013, found 490.1017.

**11b-(2-(4-methoxyphenyl)-2-oxoethyl)-5,6a-dimethyl-6-oxo-6,6a,7,11b-tetrahydr**

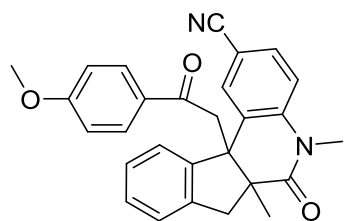

**o-5H-indeno[2,1-c]quinoline-2-carbonitrile (3ja):** by

silica gel column chromatography (hexane/ethyl acetate

= 10:1), yield: 41.8 mg, 48%; white solid; mp

180.1-180.8 °C (uncorrected); <sup>1</sup>H NMR (400 MHz,

CDCl<sub>3</sub>) δ: 7.79-7.76 (m, 2H), 7.59-7.56 (m, 1H), 7.14-7.07 (m, 2H), 7.02 (t, *J* = 8.8 Hz, 1H), 6.89-6.87 (d, *J* = 8.6 Hz, 3H), 6.82-6.79 (m, 2H), 3.99 (d, *J* = 17.2 Hz, 1H), 3.82 (s, 3H), 3.49-3.92 (m, 4H), 3.15 (d, *J* = 14.4 Hz, 1H), 2.78 (d, *J* = 15.6 Hz, 1H), 1.32 (s, 3H); <sup>13</sup>C{<sup>1</sup>H}NMR (100 MHz, CDCl<sub>3</sub>) δ: 195.4, 173.0, 163.3, 160.9, 143.8, 143.2, 139.8, 130.2, 129.8, 129.0, 127.6, 126.1, 125.0, 122.4, 114.5, 113.4, 113.3, 112.5, 112.3, 55.4, 53.6, 52.7, 45.3, 44.7, 30.1, 18.8; HRMS (ESI-TOF) *m/z*: C<sub>28</sub>H<sub>25</sub>N<sub>2</sub>O<sub>3</sub>(M + H)<sup>+</sup> calcd for 437.1860, found 437.1867.

**3-methoxy-11b-(2-(4-methoxyphenyl)-2-oxoethyl)-5,6a-dimethyl-5,6a,7,11b-tetra**

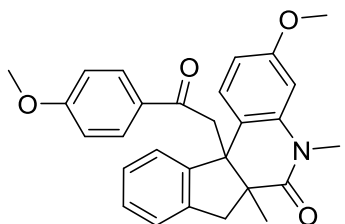

**hydro-6H-indeno[2,1-c]quinolin-6-one (3ka):** by silica

gel column chromatography (hexane/ethyl acetate =

12:1), yield: 59.9 mg, 68%; white solid; mp 143.0-143.5

°C (uncorrected); <sup>1</sup>H NMR (400 MHz, CDCl<sub>3</sub>) δ:

7.81-7.78 (m, 2H), 7.60 (d, *J* = 7.5 Hz, 1H), 7.20-7.18 (m, 2H), 7.06 (d, *J* = 8.4 Hz, 1H), 6.94 (d, *J* = 8.9 Hz, 1H), 6.83-6.81 (m, 2H), 6.42-6.38 (m, 2H), 4.04 (d, *J* = 17.0 Hz, 1H), 3.82 (s, 3H), 3.70 (s, 3H), 3.47-3.39 (m, 4H), 3.17 (d, *J* = 15.2 Hz, 1H), 2.80 (d, *J* = 15.2 Hz, 1H), 1.30 (s, 3H); <sup>13</sup>C{<sup>1</sup>H}NMR (100 MHz, CDCl<sub>3</sub>) δ: 195.7, 173.8, 163.3, 158.8, 148.4, 141.0, 140.8, 130.3, 130.0, 127.0, 126.6, 125.0, 123.7, 118.8, 113.7, 113.4, 107.0, 101.1, 55.4, 55.2, 53.6, 52.5, 45.3, 45.0, 30.1, 18.8; HRMS (ESI-TOF) *m/z*: C<sub>28</sub>H<sub>28</sub>NO<sub>4</sub> (M + H)<sup>+</sup> calcd for 442.2013, found 442.2019.

**11b-(2-(4-methoxyphenyl)-2-oxoethyl)-5,6a,9-trimethyl-5,6a,7,11b-tetrahydro-6H**

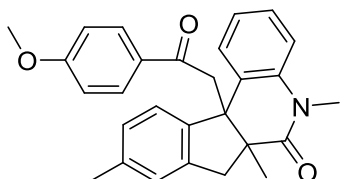

**-indeno[2,1-c]quinolin-6-one (3la):** by silica gel

column chromatography (hexane/ethyl acetate = 12:1),

yield: 49.3 mg, 58%; white solid; mp 165.0-165.5 °C

(uncorrected); <sup>1</sup>H NMR (400 MHz, CDCl<sub>3</sub>) δ: 7.9-7.77 (m, 2H), 7.50 (d, *J* = 7.7 Hz,

1H), 7.20-7.18 (m, 1H), 7.13 (d,  $J = 7.7$  Hz, 1H), 7.08-7.04 (m, 1H), 7.00 (s, 1H), 6.87-6.79 (m, 4H), 4.04 (d,  $J = 17.0$  Hz, 1H), 3.80 (s, 3H), 3.5 (s, 3H), 3.41 (d,  $J = 17.0$  Hz, 1H), 3.14 (d,  $J = 15.2$  Hz, 1H), 2.75 (d,  $J = 15.2$  Hz, 1H), 2.32 (s, 3H), 1.31 (s, 3H);  $^{13}\text{C}\{^1\text{H}\}$ NMR (100 MHz,  $\text{CDCl}_3$ )  $\delta$ : 195.7 , 173.6, 163.2 , 145.3 , 140.9 , 139.8, 136.8 , 130.2 , 129.8 , 128.9 , 127.3(2C) , 126.6 , 125.7 , 123.6 , 122.4 , 114.3 , 113.4 , 55.4 , 53.8 , 52.4 , 45.6 , 44.9 , 30.0 , 21.2 , 18.9 ; HRMS (ESI-TOF)  $m/z$ :  $\text{C}_{28}\text{H}_{28}\text{NO}_3$  ( $\text{M} + \text{H}$ ) $^+$  calcd for 426.2064, found 426.2069.

**9-fluoro-11b-(2-(4-methoxyphenyl)-2-oxoethyl)-5,6a-dimethyl-5,6a,7,11b-tetrahy**

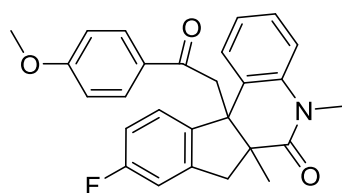

**dro-6H-indeno[2,1-c]quinolin-6-one (3ma):** by silica gel column chromatography (hexane/ethyl acetate = 12:1), yield: 42.0 mg, 49%; white solid; mp 176.0-176.5 °C (uncorrected);  $^1\text{H}$  NMR (400 MHz,  $\text{CDCl}_3$ )  $\delta$ : 7.78-7.75

(m, 2H), 7.59-7.56 (m, 1H), 7.14-7.07 (m, 2H), 7.04-7.00 (m, 1H), 6.90-6.84 (m, 3H), 6.82-6.77 (m, 2H), 4.00 (d,  $J = 16.9$  Hz, 1H), 3.82 (s, 3H), 3.49 (s, 3H), 3.44-3.38 (m, 1H), 3.14 (t,  $J = 15.5$  Hz, 1H), 2.80-2.69 (m, 1H), 1.32 (s, 3H);  $^{19}\text{F}$  NMR (282 MHz,  $\text{CDCl}_3$ )  $\delta$ : -115.6(s,1F);  $^{13}\text{C}\{^1\text{H}\}$ NMR (100 MHz,  $\text{CDCl}_3$ )  $\delta$ : 195.4 , 173.1 , 163.3 , 160.9, 143.8(d,  $J = 2.4$  Hz, 1C), 143.2 (d,  $J = 8.4$  Hz, 1C), 139.8 , 130.2 , 129.8 , 129.0 , 127.6 , 126.1 , 125.0 (d,  $J = 8.9$  Hz, 1C) , 122.5 , 114.5 , 113.5 (d,  $J = 22.3$  Hz, 1C) , 113.4 , 112.5 (d,  $J = 22.2$ Hz, 1C), 55.4 , 53.6 , 52.8 , 45.3 , 44.7 , 30.1 , 18.8; HRMS (ESI-TOF)  $m/z$ :  $\text{C}_{27}\text{H}_{25}\text{FNO}_3$  ( $\text{M} + \text{H}$ ) $^+$  calcd for 430.1813, found 430.1818.

**9-chloro-11b-(2-(4-methoxyphenyl)-2-oxoethyl)-5,6a-dimethyl-5,6a,7,11b-tetrahy**

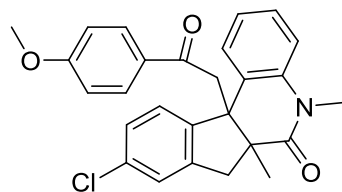

**dro-6H-indeno[2,1-c]quinolin-6-one (3na):** by silica gel column chromatography (hexane/ethyl acetate = 12:1), yield: 54.3 mg, 61%; white solid; mp 171.0-171.5 °C (uncorrected);  $^1\text{H}$  NMR (400 MHz,  $\text{CDCl}_3$ )  $\delta$ :

7.78-7.76 (m, 2H), 7.59-7.55 (m, 1H), 7.30 (d,  $J = 7.8$  Hz, 1H), 7.16-7.07 (m, 3H), 6.94-6.80 (m, 4H), 4.02-3.97 (m, 1H), 3.81 (s, 3H), 3.48-3.40 (m, 4H), 3.14 (d,  $J = 15.6$  Hz, 1H), 2.78 (d,  $J = 15.5$  Hz, 1H), 1.30 (d,  $J = 6.1$  Hz, 3H);  $^{13}\text{C}\{^1\text{H}\}$ NMR (100 MHz,  $\text{CDCl}_3$ )  $\delta$ : 195.3 , 173.0 , 163.3 , 146.7 , 142.9 , 139.8, 132.8 , 130.2 , 129.7 ,

128.9 , 127.7 , 126.8 , 125.7 , 125.3 , 125.0 , 122.5 , 114.5 , 113.4 , 55.4 , 53.8 , 52.6 , 45.1 , 44.5 , 30.1 , 18.8; HRMS (ESI-TOF)  $m/z$ :  $C_{27}H_{25}ClNO_3$  ( $M + H$ )<sup>+</sup> calcd for 446.1517, found 446.1511.

**9-bromo-11b-(2-(4-methoxyphenyl)-2-oxoethyl)-5,6a-dimethyl-5,6a,7,11b-tetrahydro-6H-indeno[2,1-c]quinolin-6-one (30a):**

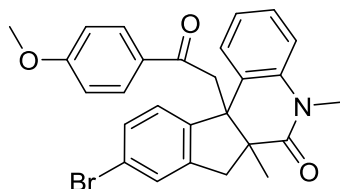

dro-6H-indeno[2,1-c]quinolin-6-one (30a): by silica gel column chromatography (hexane/ethyl acetate = 12:1), yield: 67.5 mg, 69%; white solid; mp 163.0-163.5 °C (uncorrected); <sup>1</sup>H NMR (400 MHz, CDCl<sub>3</sub>) δ: 7.82 (d,

$J = 9.3$  Hz, 2H), 7.60 (d,  $J = 7.7$  Hz, 1H), 7.37 (t,  $J = 7.3$  Hz, 1H), 7.26-7.17 (m, 4H), 6.86-6.83 (m, 2H), 6.77 (d,  $J = 8.8$  Hz, 1H), 4.03 (d,  $J = 17.3$  Hz, 1H), 3.84 (s, 3H), 3.47 (d,  $J = 15.5$  Hz, 4H), 3.17 (d,  $J = 15.3$  Hz, 1H), 2.82 (d,  $J = 15.3$  Hz, 1H), 1.27 (s, 3H); <sup>13</sup>C{<sup>1</sup>H}NMR (100 MHz, CDCl<sub>3</sub>) δ: 195.3, 173.3, 163.5, 147.5, 140.7, 139.3, 131.7, 130.4, 130.3, 129.5, 128.8, 127.5, 127.1, 125.0, 123.8, 116.2, 114.9, 113.5, 55.4, 54.0, 52.2, 45.8, 45.1, 30.2, 18.8; HRMS (ESI-TOF)  $m/z$ :  $C_{27}H_{25}BrNO_3$  ( $M + H$ )<sup>+</sup> calcd for 490.1013, found 490.1016.

**11b-(2-(4-methoxyphenyl)-2-oxoethyl)-5,6a,10-trimethyl-5,6a,7,11b-tetrahydro-6H-indeno[2,1-c]quinolin-6-one (3pa) and 11b-(2-(4-methoxyphenyl)-2-oxoethyl)-5,6a,8-trimethyl-5,6a,7,11b-tetrahydro-6H-indeno[2,1-c]quinolin-6-one (3pa')**

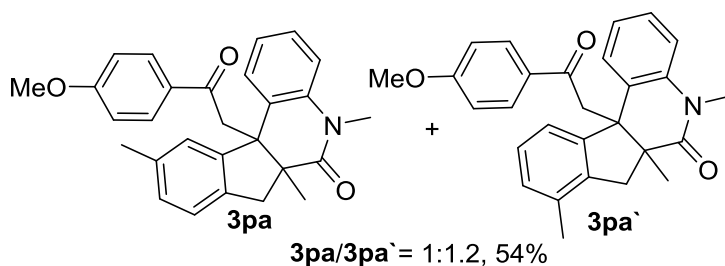

**H-indeno[2,1-c]quinolin-6-one (3pa) and 11b-(2-(4-methoxyphenyl)-2-oxoethyl)-5,6a,8-trimethyl-5,6a,7,11b-tetrahydro-6H-indeno[2,1-c]quinolin-6-one (3pa')**

Yield: 51.4 mg, 54% , and ; yellow oil; <sup>1</sup>H NMR (400 MHz, CDCl<sub>3</sub>) δ: 7.82 (d,  $J = 9.3$  Hz, 2H), 7.44 (t,  $J = 7.7$  Hz, 1H), 7.25-7.18 (t,  $J = 7.3$  Hz, 1.5H), 7.10-7.00 (m, 2.5H), 6.89-6.80 (m, 4H), 4.06-4.01 (m, 1H), 3.82 (s, 3H), 3.50-3.40 (m, 4H), 3.14-3.03 (m, 1H), 2.83-2.74(m, 1H), 2.47 (s, 1.4H), 2.17 (s, 1.6H), 1.31 (s, 3H); <sup>13</sup>C{<sup>1</sup>H}NMR (100 MHz, CDCl<sub>3</sub>) δ: 195.3, 173.3, 171.1, 163.5, 147.5, 140.7, 139.3, 131.7, 130.4, 130.3, 129.5, 128.8, 127.5, 127.1, 125.0, 123.8, 116.2, 114.9, 113.5, 60.4, 55.4, 54.2, 54.0, 52.5, 51.9, 45.6, 45.4, 44.6, 43.7, 30.1, 29.7, 21.6, 19.2, 18.9; HRMS (ESI-TOF)  $m/z$ :  $C_{28}H_{27}NO_3$  ( $M +$

H)<sup>+</sup> calcd for 426.6024, found 426.6028.

**5-benzyl-11b-(2-(4-methoxyphenyl)-2-oxoethyl)-6a-methyl-5,6a,7,11b-tetrahydro**

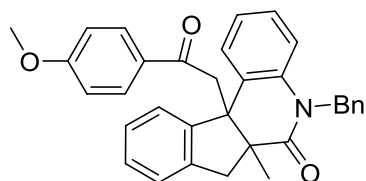

**-6H-indeno[2,1-c]quinolin-6-one (3qa):** by silica gel column chromatography (hexane/ethyl acetate = 12:1), yield: 57.5 mg, 59%; yellow oil; <sup>1</sup>H NMR (400 MHz, CDCl<sub>3</sub>) δ:

7.85 (d, *J* = 8.9 Hz, 2H), 7.64 (d, *J* = 7.6 Hz, 1H), 7.37-7.31 (m, 5H), 7.25-7.21 (m, 4H), 6.92-6.90 (m, 1H), 6.85-6.76 (m, 4H), 5.90 (d, *J* = 16.4 Hz, 1H), 4.76 (d, *J* = 16.4 Hz, 1H), 4.13 (d, *J* = 17.3 Hz, 1H), 3.82 (s, 3H), 3.50 (d, *J* = 17.3 Hz, 1H), 3.38 (d, *J* = 15.1 Hz, 1H), 2.94 (d, *J* = 15.1 Hz, 1H), 1.36 (s, 3H).; <sup>13</sup>C{<sup>1</sup>H}NMR (100 MHz, CDCl<sub>3</sub>) δ: 195.6, 173.9, 163.4, 148.2, 140.7, 139.5, 138.1, 130.3, 129.8, 129.0, 128.6, 127.4, 127.2, 126.8, 126.7, 126.3(2C), 125.0, 124.0, 122.6, 115.3, 113.6, 55.5, 54.3, 52.6, 47.4, 45.7, 45.4, 18.9; HRMS (ESI-TOF) *m/z*: C<sub>33</sub>H<sub>30</sub>NO<sub>3</sub> (M + H)<sup>+</sup> calcd for 488.2221, found 488.2228.

**1,3,4-Trimethyl-3-(2-oxo-2-(p-tolyl)ethyl)-5-phenyl-1,3-dihydro-2H-benzo[b]azep**

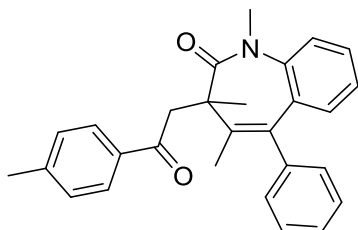

**in-2-one (3tb):** by silica gel column chromatography (hexane/ethyl acetate = 10:1), yield: 47.4 mg, 58%; yellow oil; <sup>1</sup>H NMR (400 MHz, CDCl<sub>3</sub>) δ:

7.39-7.28 (m, 8H), 7.08 (d, *J* = 7.9 Hz, 3H), 6.84 (t, *J* = 7.5 Hz, 1H), 6.77 (d, *J* = 8.0 Hz, 1H), 3.54 (s, 3H), 2.97 (d, *J* = 18.5 Hz, 1H), 2.72 (d, *J* = 18.5 Hz, 1H), 2.33 (s, 3H), 1.93 (s, 3H), 1.69 (s, 3H); <sup>13</sup>C{<sup>1</sup>H}NMR (100 MHz, CDCl<sub>3</sub>) δ: 197.0, 172.3, 143.5, 143.0, 141.3, 139.9, 135.0, 134.6, 130.5, 130.1, 129.1, 128.9, 128.2, 127.6, 127.5, 126.8, 123.5, 121.4, 47.8, 44.0, 38.0, 23.8, 21.5, 19.9; HRMS (ESI-TOF) *m/z*: C<sub>28</sub>H<sub>28</sub>NO<sub>2</sub> (M + H)<sup>+</sup> calcd for 410.2115, found 410.2120.

**2,6-Di-tert-butyl-4-neopentylphenol (7):** by silica gel column chromatography

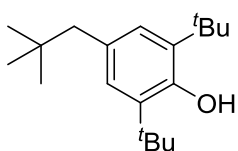

(hexane/ethyl acetate = 100:1), yield: 33.1 mg, 60%; yellow oil; <sup>1</sup>H NMR (400 MHz, CDCl<sub>3</sub>) δ: 7.13 (s, 2H), 5.12 (s, 1H), 4.33 (s, 2H), 1.43 (s, 18H), 1.30 (s, 9H); <sup>13</sup>C{<sup>1</sup>H}NMR (100 MHz, CDCl<sub>3</sub>) δ:

153.1, 135.6, 129.9, 124.9, 73.1, 64.7, 34.2, 30.2, 27.7; HRMS (ESI-TOF) *m/z*: C<sub>19</sub>H<sub>33</sub>O (M + H)<sup>+</sup> calcd for 277.2526, found 277.2531.



**2,2,6,6-tetramethylpiperidin-1-yl 4-methoxybenzoate (8)**: by silica gel column chromatography (hexane/ethyl acetate = 12:1), yield:45.3 mg, 68%; yellow oil;  $^1\text{H}$

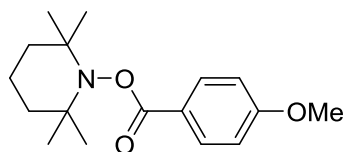

NMR (400 MHz,  $\text{CDCl}_3$ )  $\delta$ : 8.03 (d,  $J = 8.9$  Hz, 2H), 6.94 (d,  $J = 8.9$  Hz, 2H), 3.87 (s, 3H), 1.84-1.67 (m, 4H), 1.60-1.56 (m, 2H), 1.27(s, 6H), 1.11(s, 6H);

$^{13}\text{C}\{^1\text{H}\}$ NMR (100 MHz,  $\text{CDCl}_3$ )  $\delta$ : 166.1, 163.2, 131.5, 121.9, 113.7, 60.3, 55.4, 39.0, 31.9, 20.8, 17.0; HRMS (ESI-TOF)  $m/z$ :  $\text{C}_{17}\text{H}_{26}\text{NO}_3$  ( $\text{M} + \text{H}$ ) $^+$  calcd for 292.1908, found 292.1913.

**1-(4-Methoxyphenyl)-3,3-diphenylprop-2-en-1-one (10)**: by silica gel column chromatography (hexane/ethyl acetate = 12:1), yield:45.3 mg, 68%; white solid; mp 110.0-110.5 $^\circ\text{C}$  (uncorrected);

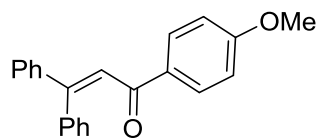

$^1\text{H}$  NMR (400 MHz,  $\text{CDCl}_3$ )  $\delta$ : 7.91 (d,  $J = 8.8$  Hz, 2H),

7.37 (d,  $J = 7.9$  Hz, 4H), 7.30-7.20 (m, 6H), 6.86 (d,  $J = 8.9$  Hz, 2H), 4.12 (s, 1H), 3.85 (s, 3H);  $^{13}\text{C}\{^1\text{H}\}$ NMR (100 MHz,  $\text{CDCl}_3$ )  $\delta$ : 195.6, 163.0, 143.7, 131.5, 130.7, 127.5, 127.4, 127.0, 113.2, 86.4, 79.7, 55.4; HRMS (ESI-TOF)  $m/z$ :  $\text{C}_{22}\text{H}_{19}\text{O}_2$  ( $\text{M} + \text{H}$ ) $^+$  calcd for 315.1380, found 315.1385.

## 4. References

- [1] H.-W. Wang, B.-B. Wang, S. Sun, J. Cheng, *Org. Chem. Front.*, **2018**, 5, 2547-2551.

## 5. X-Ray Crystallographic Data

A single crystal of **3ag** suitable for X-ray crystallography was obtained by crystallization via evaporation from its PE/DCM solution.

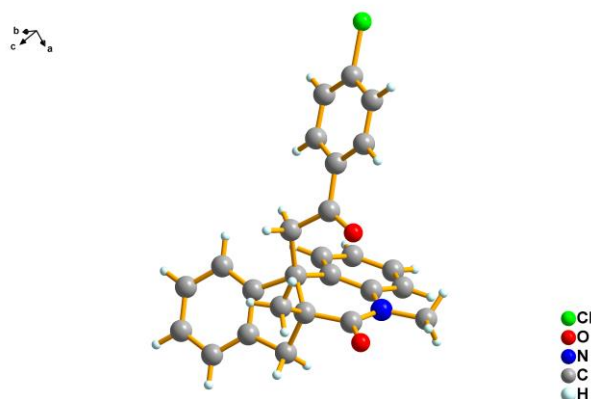

Figure S3. X-Ray crystallographic data of **3ag**. Thermal ellipsoids are shown at the 30% level.

Table S2. Crystal data and structure refinement for **3ag**

|                                 |                                                   |                                                   |                 |
|---------------------------------|---------------------------------------------------|---------------------------------------------------|-----------------|
| Bond precision:                 | C-C = 0.0018 Å                                    | Wavelength=1.54184                                |                 |
| Cell:                           | a=7.7575(2)                                       | b=11.8553(3)                                      | c=12.4714(3)    |
|                                 | alpha=68.379(2)                                   | beta=88.015(2)                                    | gamma=75.886(2) |
| Temperature:                    | 100 K                                             |                                                   |                 |
|                                 | Calculated                                        | Reported                                          |                 |
| Volume                          | 1032.14(5)                                        | 1032.13(5)                                        |                 |
| Space group                     | P -1                                              | P -1                                              |                 |
| Hall group                      | -P 1                                              | -P 1                                              |                 |
| Moiety formula                  | C <sub>26</sub> H <sub>22</sub> ClNO <sub>2</sub> | C <sub>26</sub> H <sub>22</sub> ClNO <sub>2</sub> |                 |
| Sum formula                     | C <sub>26</sub> H <sub>22</sub> ClNO <sub>2</sub> | C <sub>26</sub> H <sub>22</sub> ClNO <sub>2</sub> |                 |
| Mr                              | 415.90                                            | 423.97                                            |                 |
| Dx, g cm <sup>-3</sup>          | 1.338                                             | 1.364                                             |                 |
| Z                               | 2                                                 | 2                                                 |                 |
| Mu (mm <sup>-1</sup> )          | 1.816                                             | 1.795                                             |                 |
| F000                            | 436.0                                             | 450.0                                             |                 |
| F000'                           | 437.88                                            |                                                   |                 |
| h,k,lmax                        | 9,14,15                                           | 9,14,15                                           |                 |
| Nref                            | 4336                                              | 4123                                              |                 |
| Tmin,Tmax                       | 0.760,0.764                                       | 0.755,1.000                                       |                 |
| Tmin'                           | 0.026                                             |                                                   |                 |
| Correction method= # Reported T |                                                   | Limits: Tmin=0.755                                | Tmax=1.000      |
| AbsCorr = MULTI-SCAN            |                                                   |                                                   |                 |
| Data completeness= 0.951        |                                                   | Theta(max)= 76.310                                |                 |
| R(reflections)= 0.0315( 3990)   |                                                   | wR2(reflections) = 0.0807( 4123)                  |                 |
| S = 1.040                       |                                                   | Npar= 274                                         |                 |

## 7. Copies of NMR Spectra

### 11b-(2-(4-methoxyphenyl)-2-oxoethyl)-5,6a-dimethyl-5,6a,7,11b-tetrahydro-6H-indeno[2,1-c]quinolin-6-one (3aa)

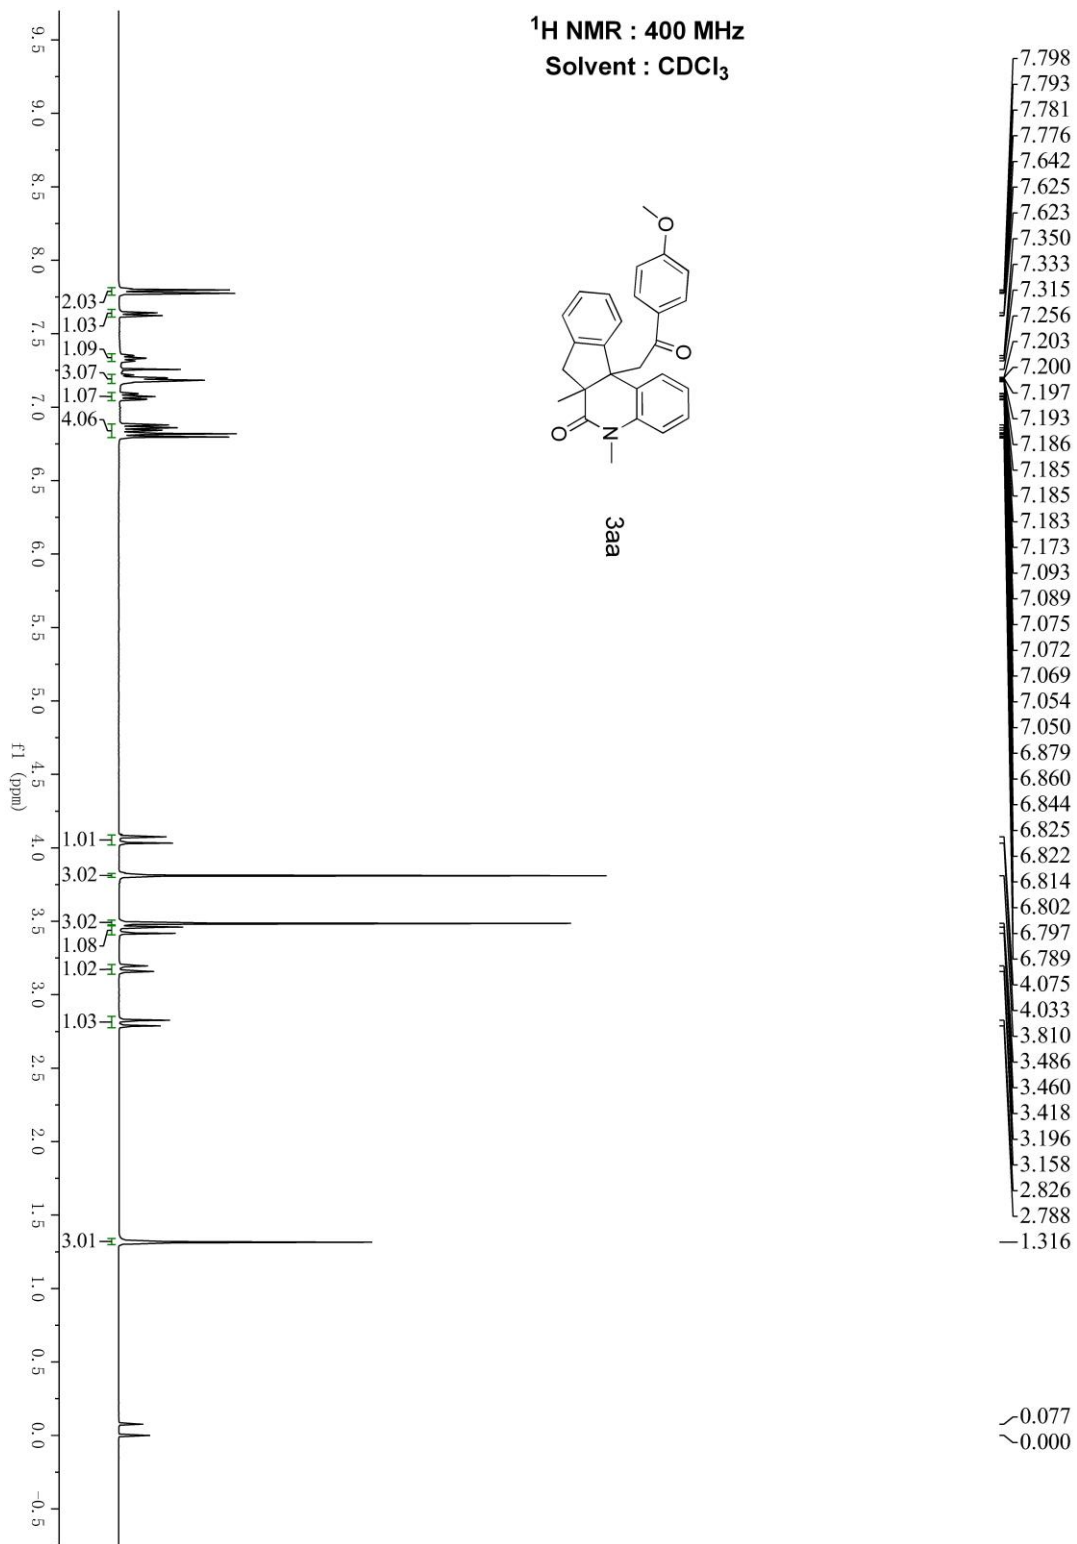

$^{13}\text{C}$   $\{^1\text{H}\}$  NMR : 100 MHz  
Solvent :  $\text{CDCl}_3$

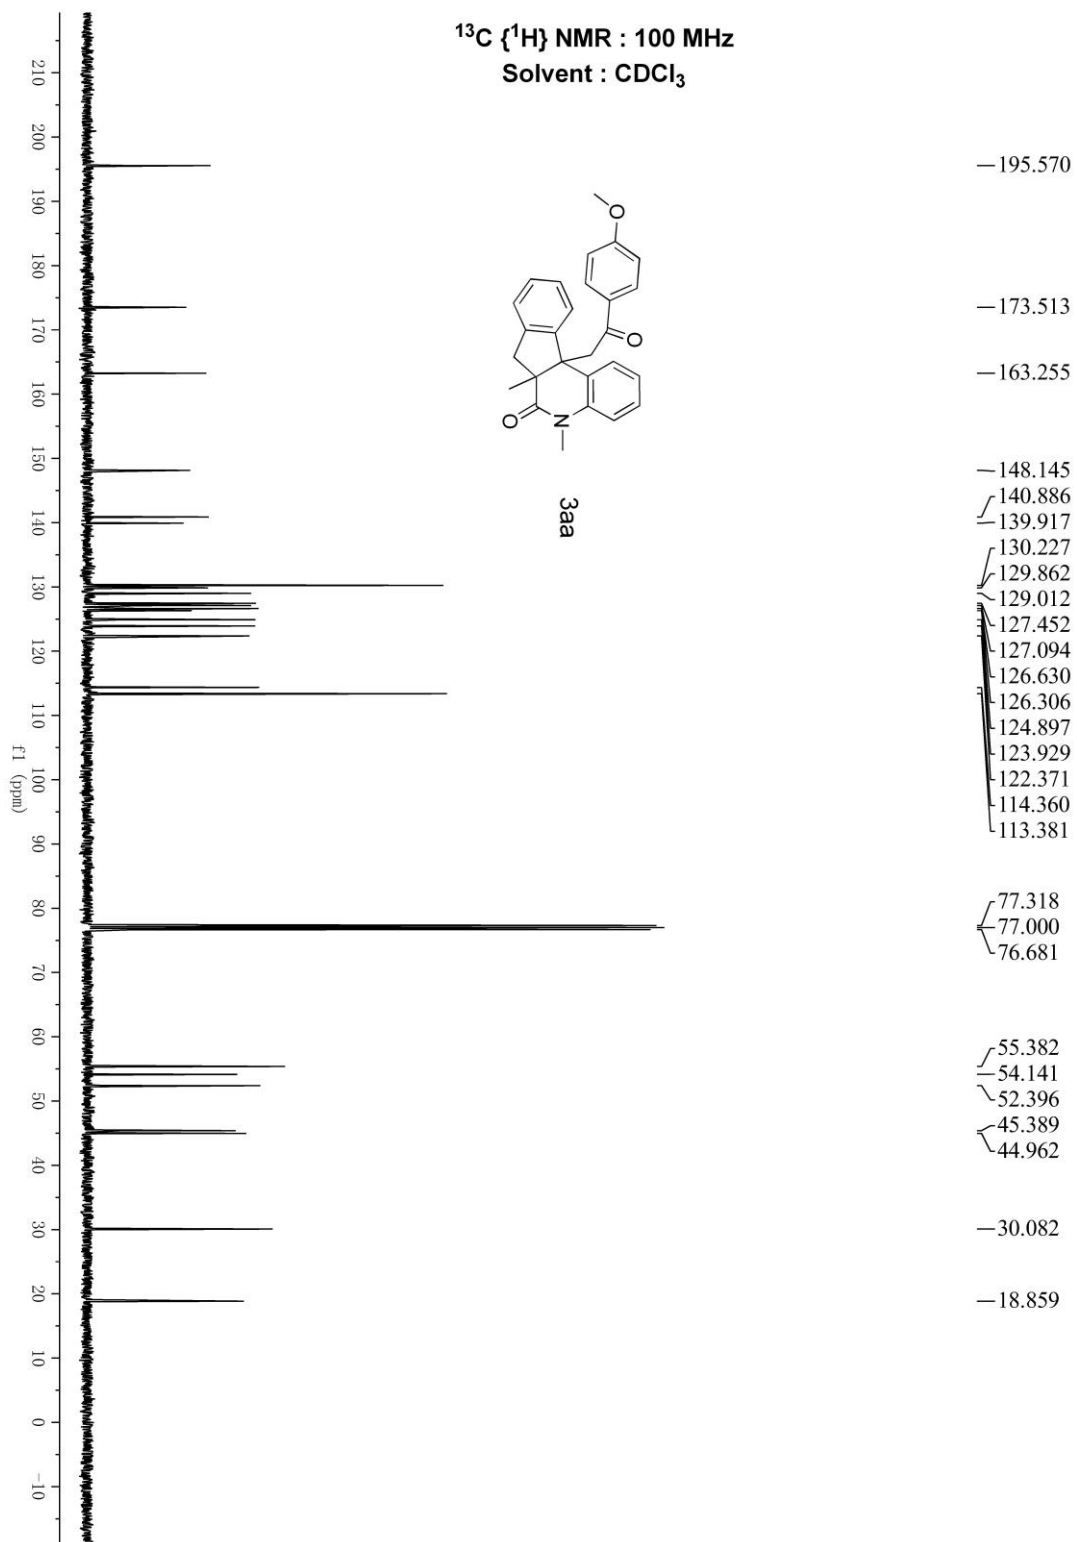

**5,6a-dimethyl-11b-(2-oxo-2-(p-tolyl)ethyl)-5,6a,7,11b-tetrahydro-6H-indeno[2,1-c]quinolin-6-one (3ab)**

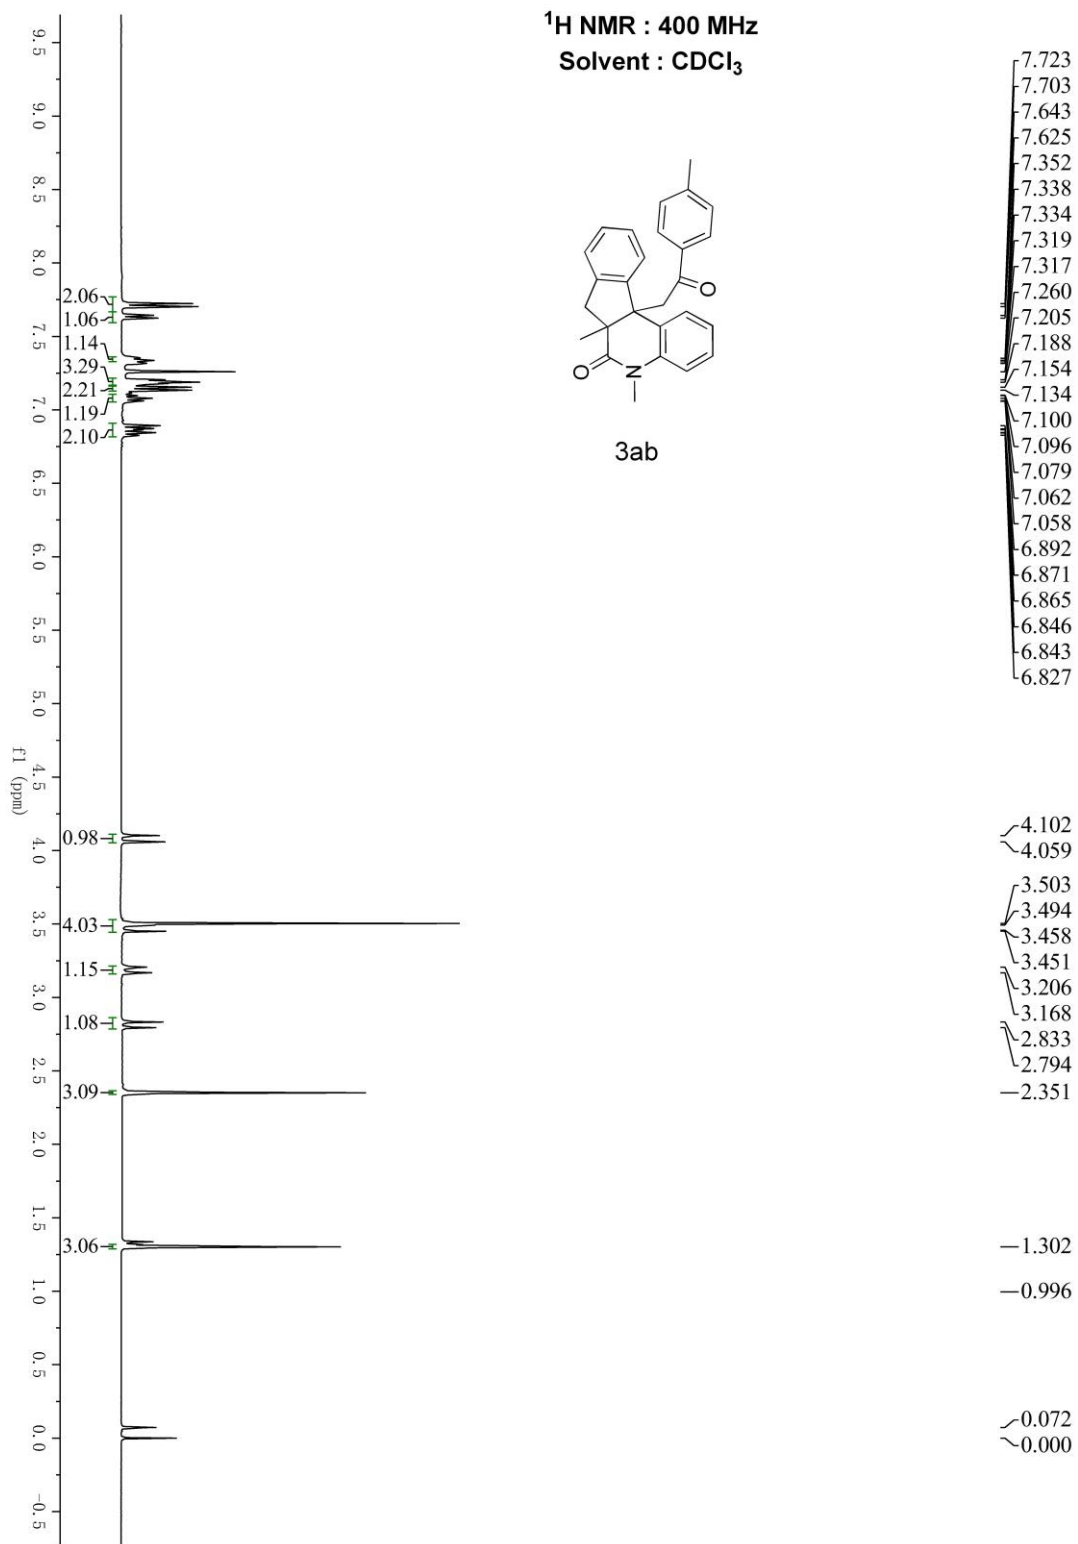

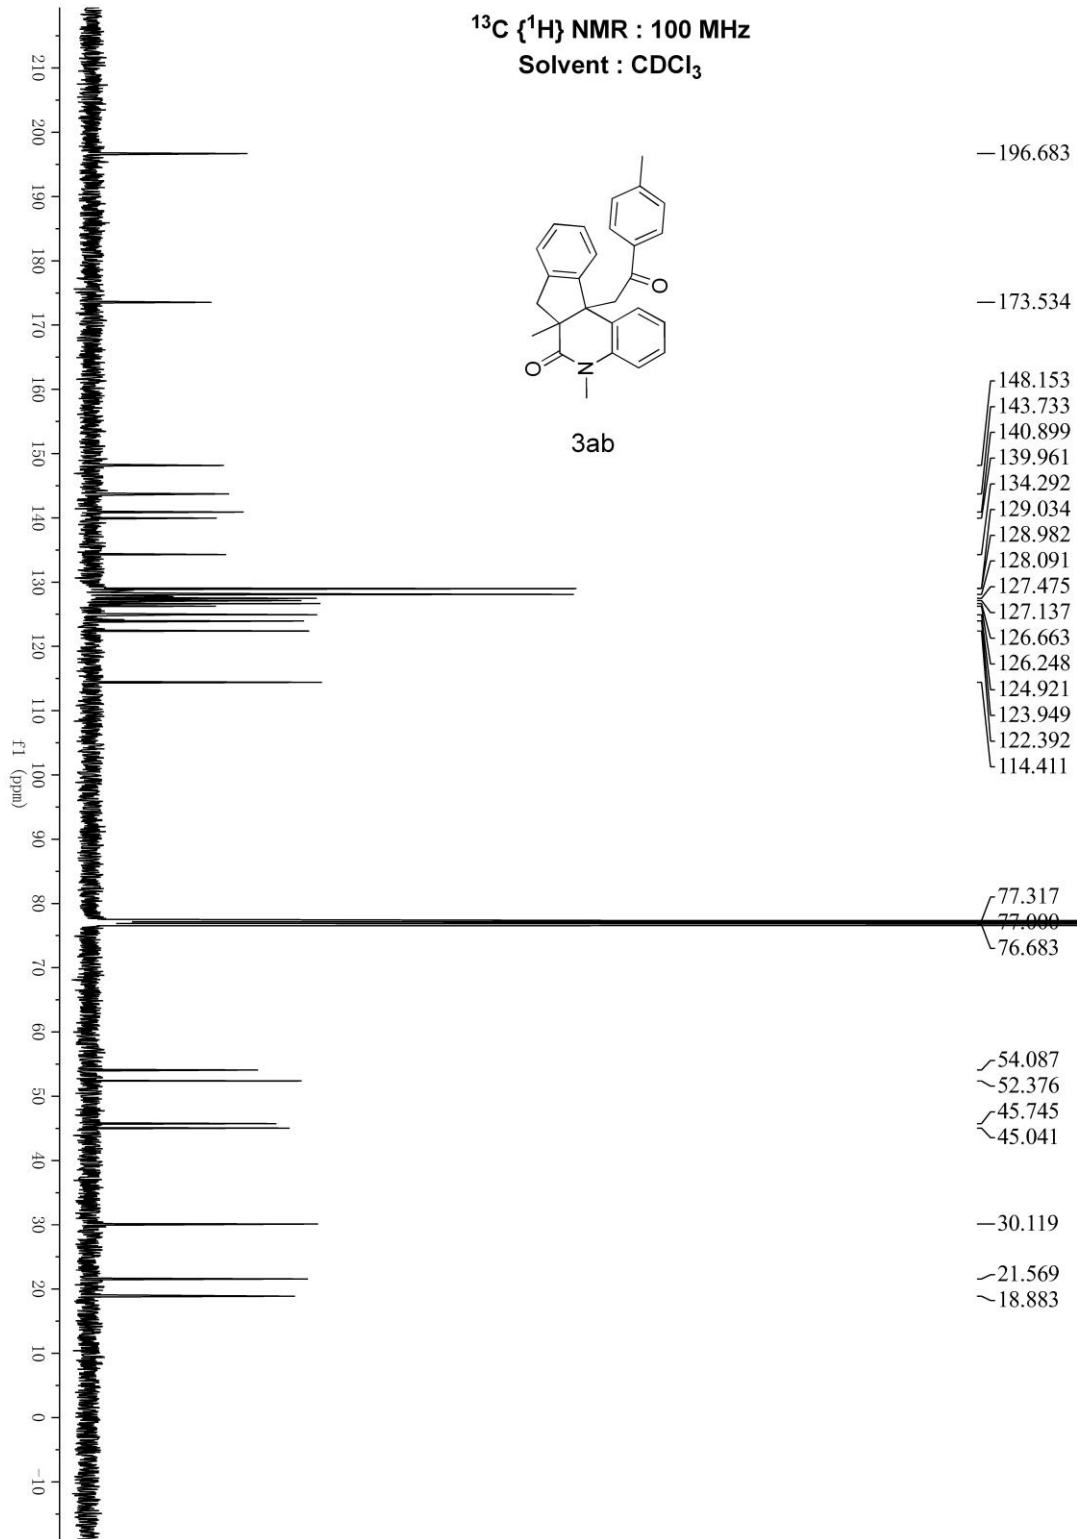

**11b-(2-(4-ethylphenyl)-2-oxoethyl)-5,6a-dimethyl-5,6a,7,11b-tetrahydro-6H-indeno[2,1-c]quinolin-6-one (3ac)**

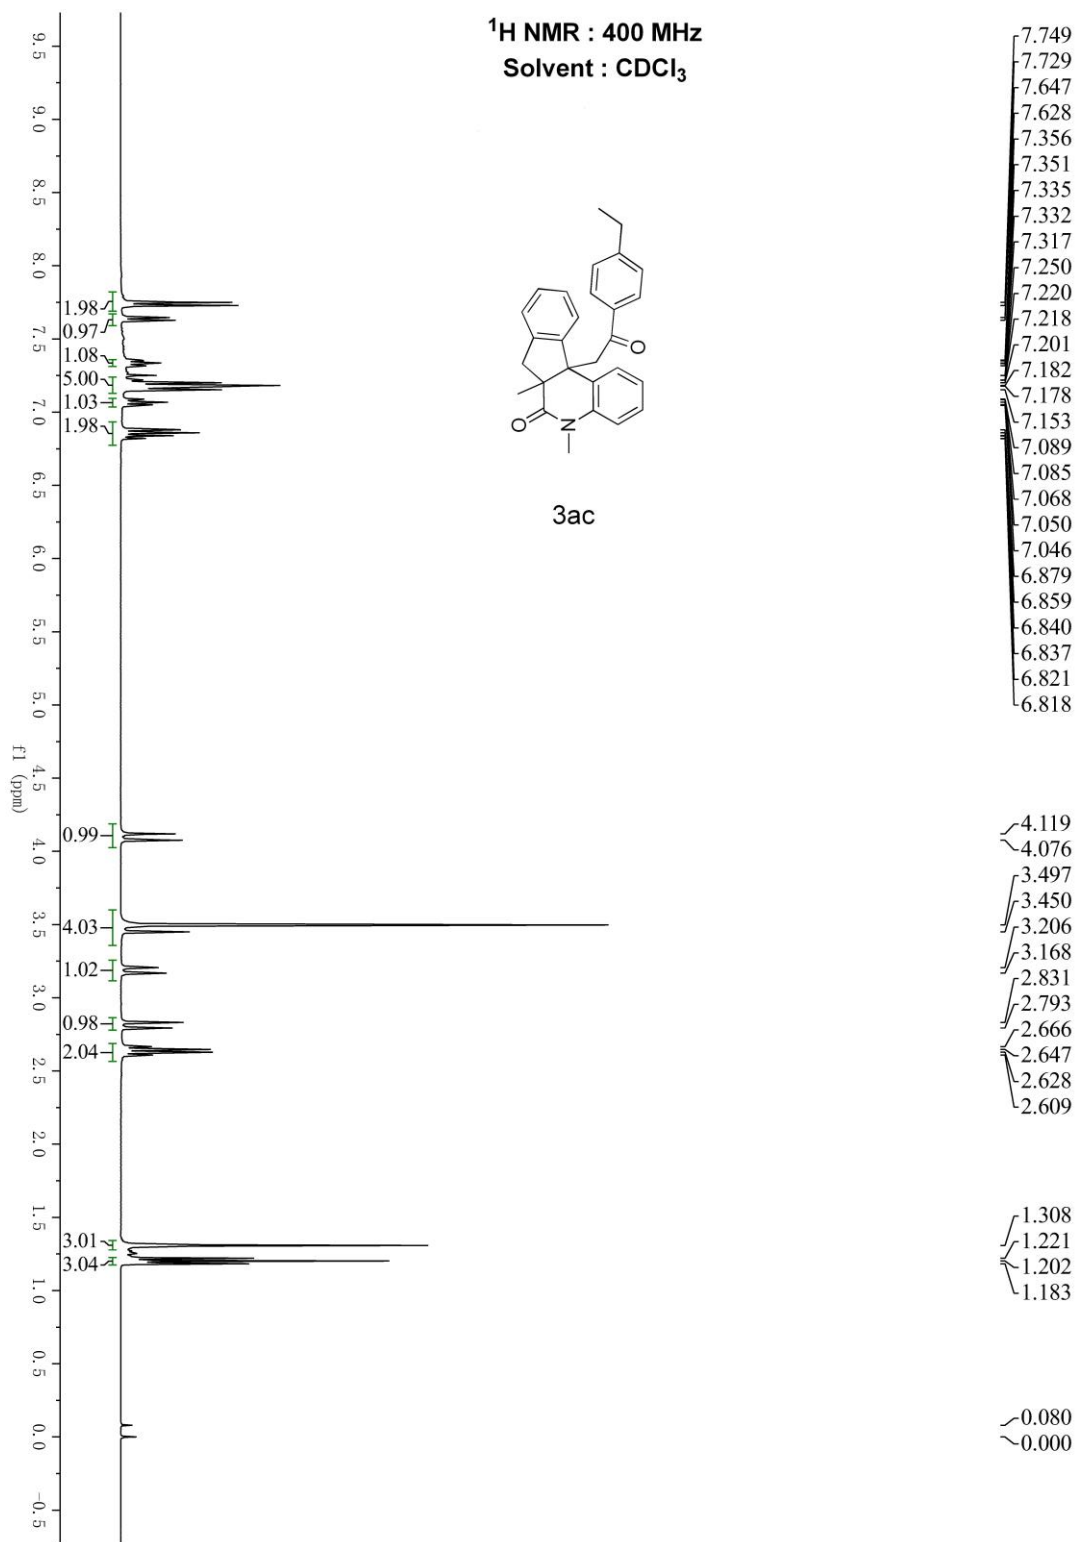

$^{13}\text{C} \{^1\text{H}\}$  NMR : 100 MHz  
Solvent :  $\text{CDCl}_3$

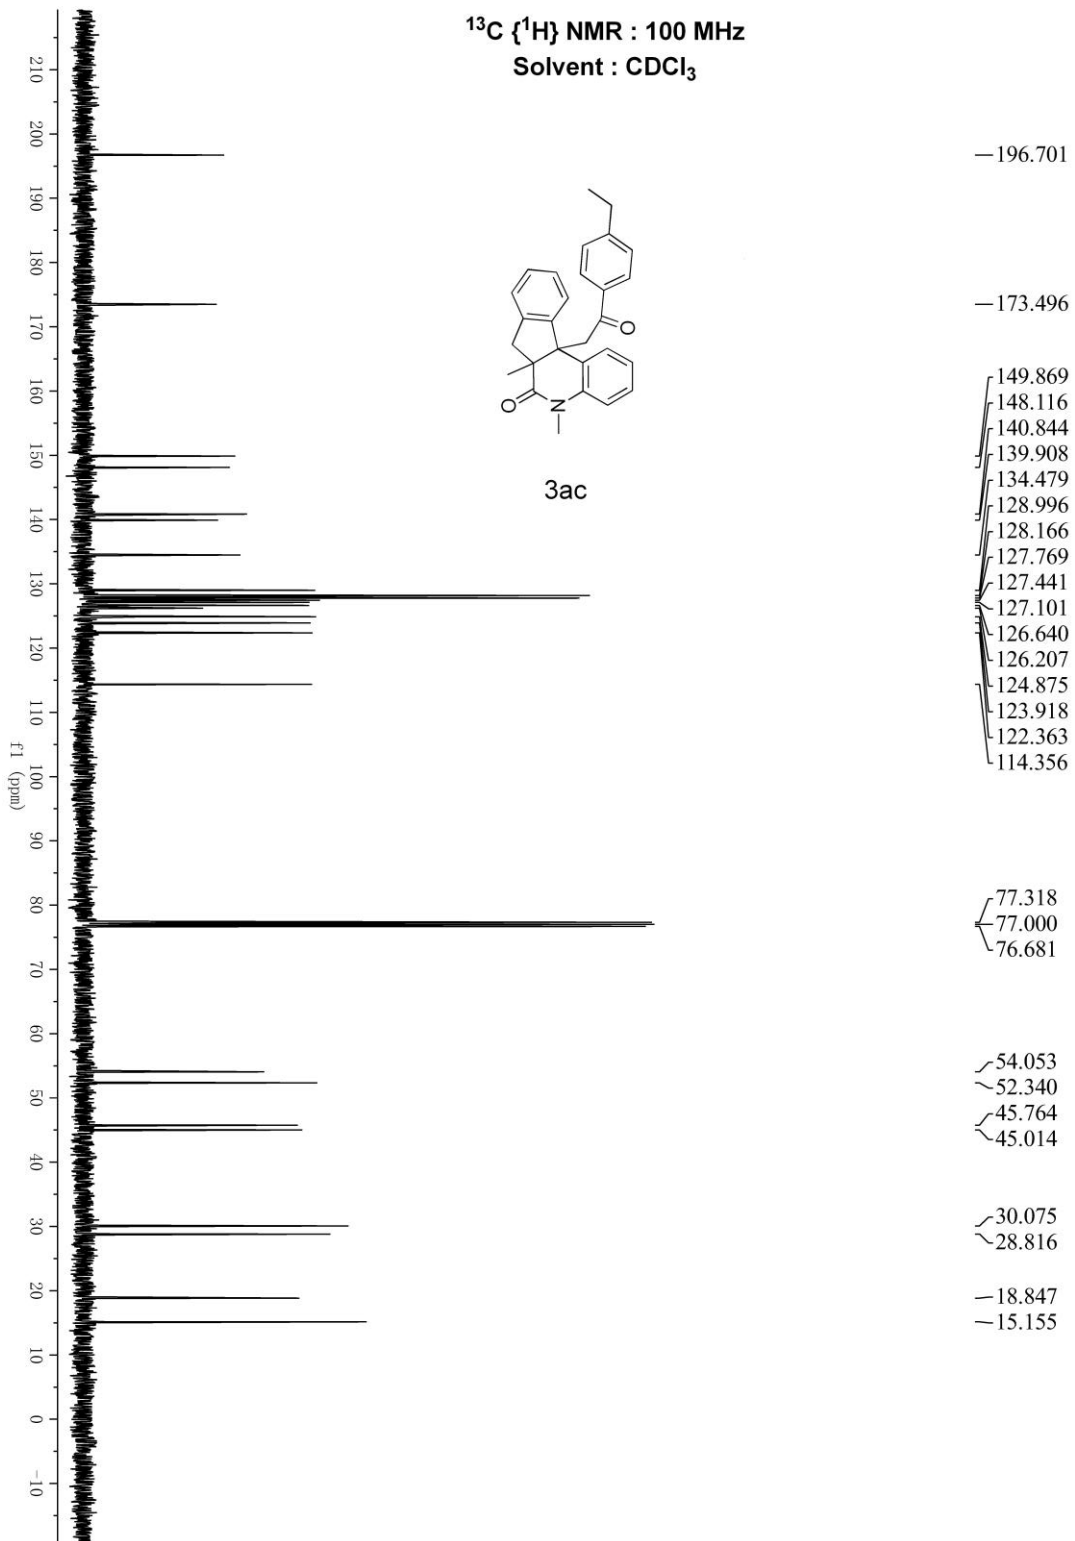



**11b-(2-(4-isopropylphenyl)-2-oxoethyl)-5,6a-dimethyl-5,6a,7,11b-tetrahydro-6H-indeno[2,1-c]quinolin-6-one (3ad)**

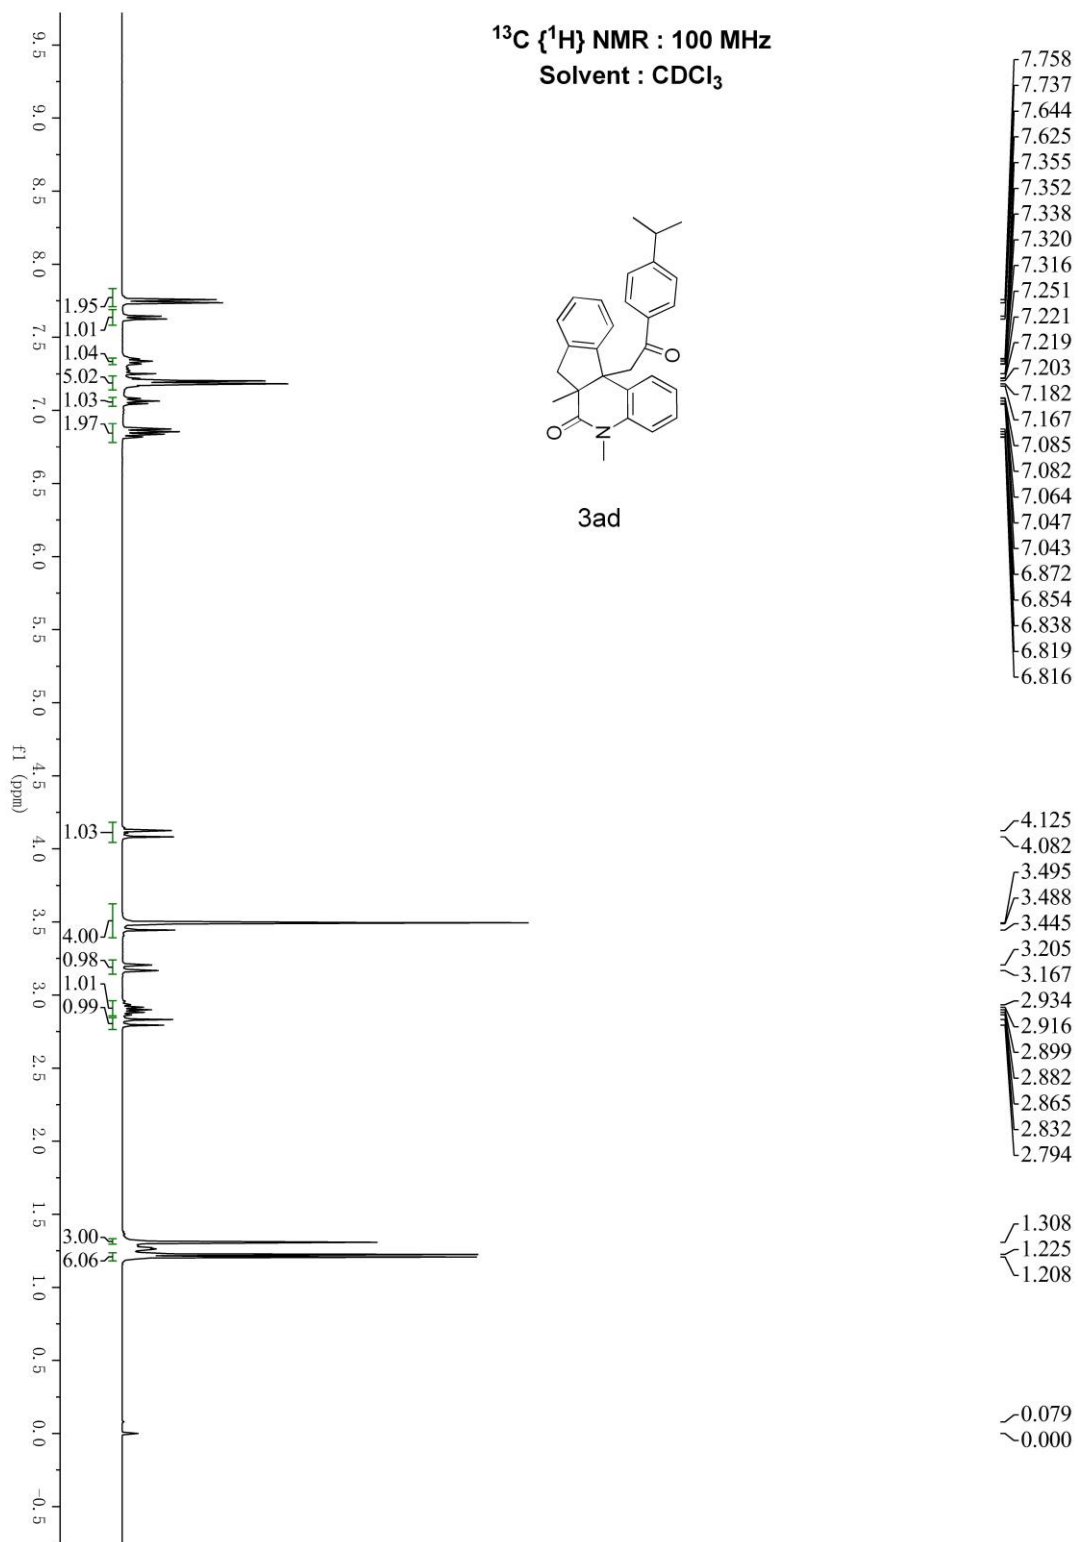

<sup>13</sup>C {<sup>1</sup>H} NMR : 100 MHz  
Solvent : CDCl<sub>3</sub>

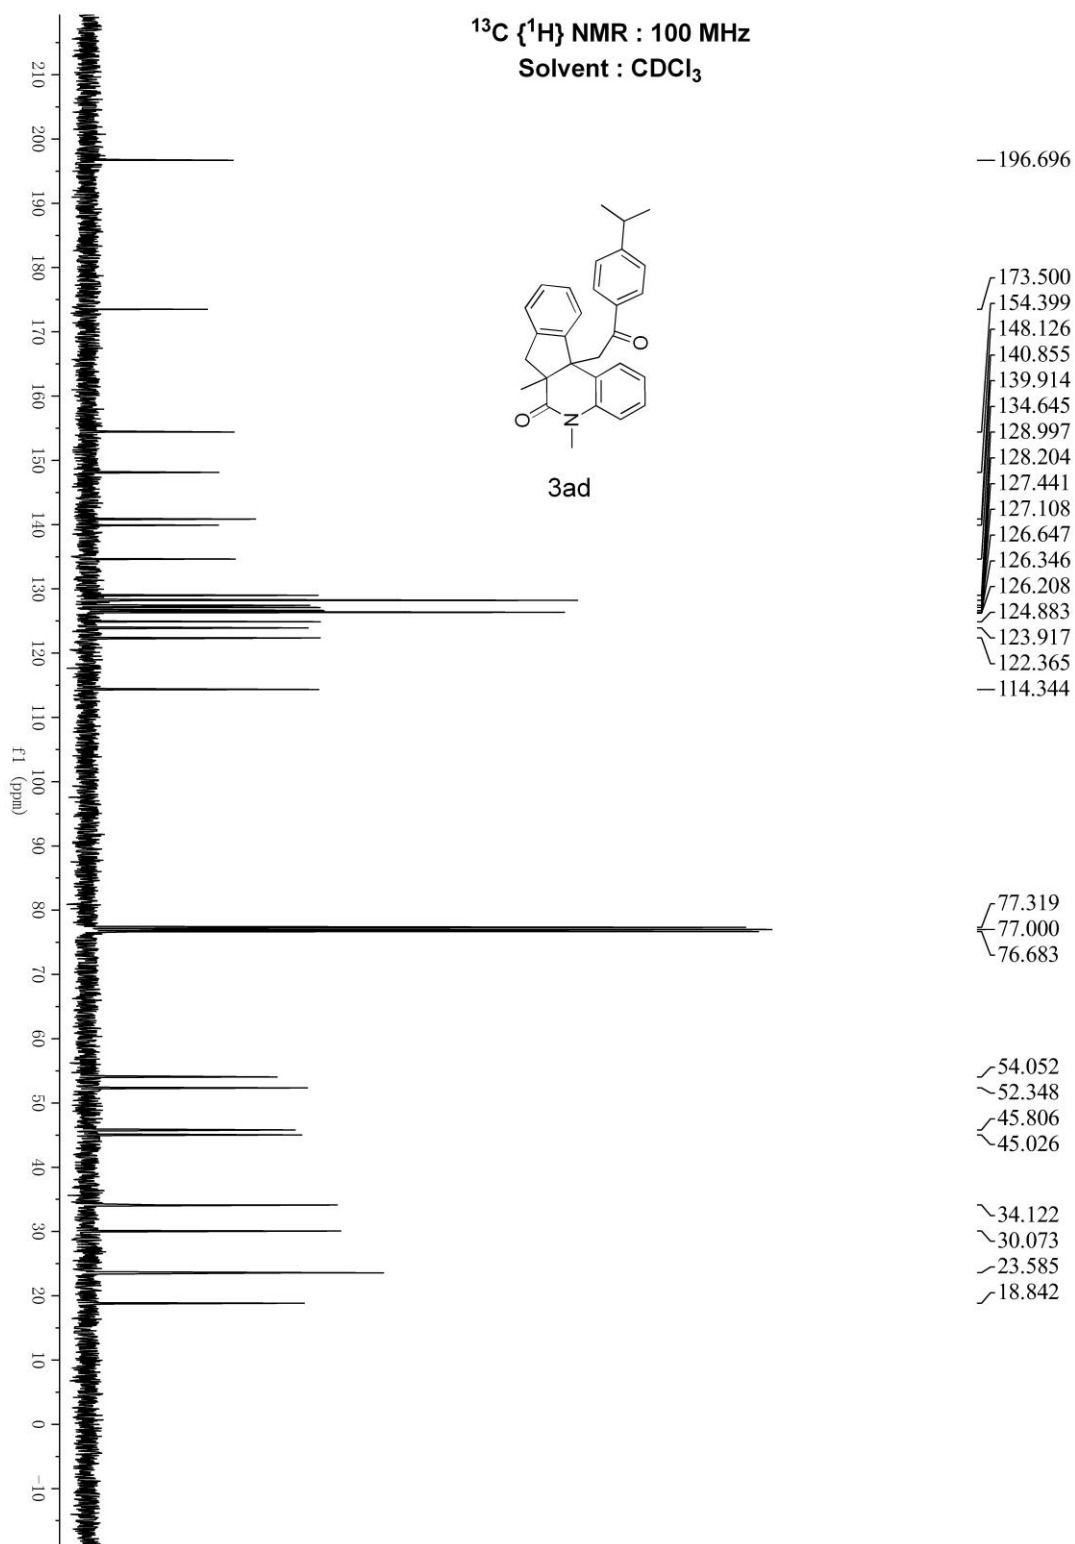

**11b-(2-(4-(tert-butyl)phenyl)-2-oxoethyl)-5,6a-dimethyl-5,6,7,11b-tetrahydro-6H-indeno[2,1-c]quinolin-6-one (3ae)**

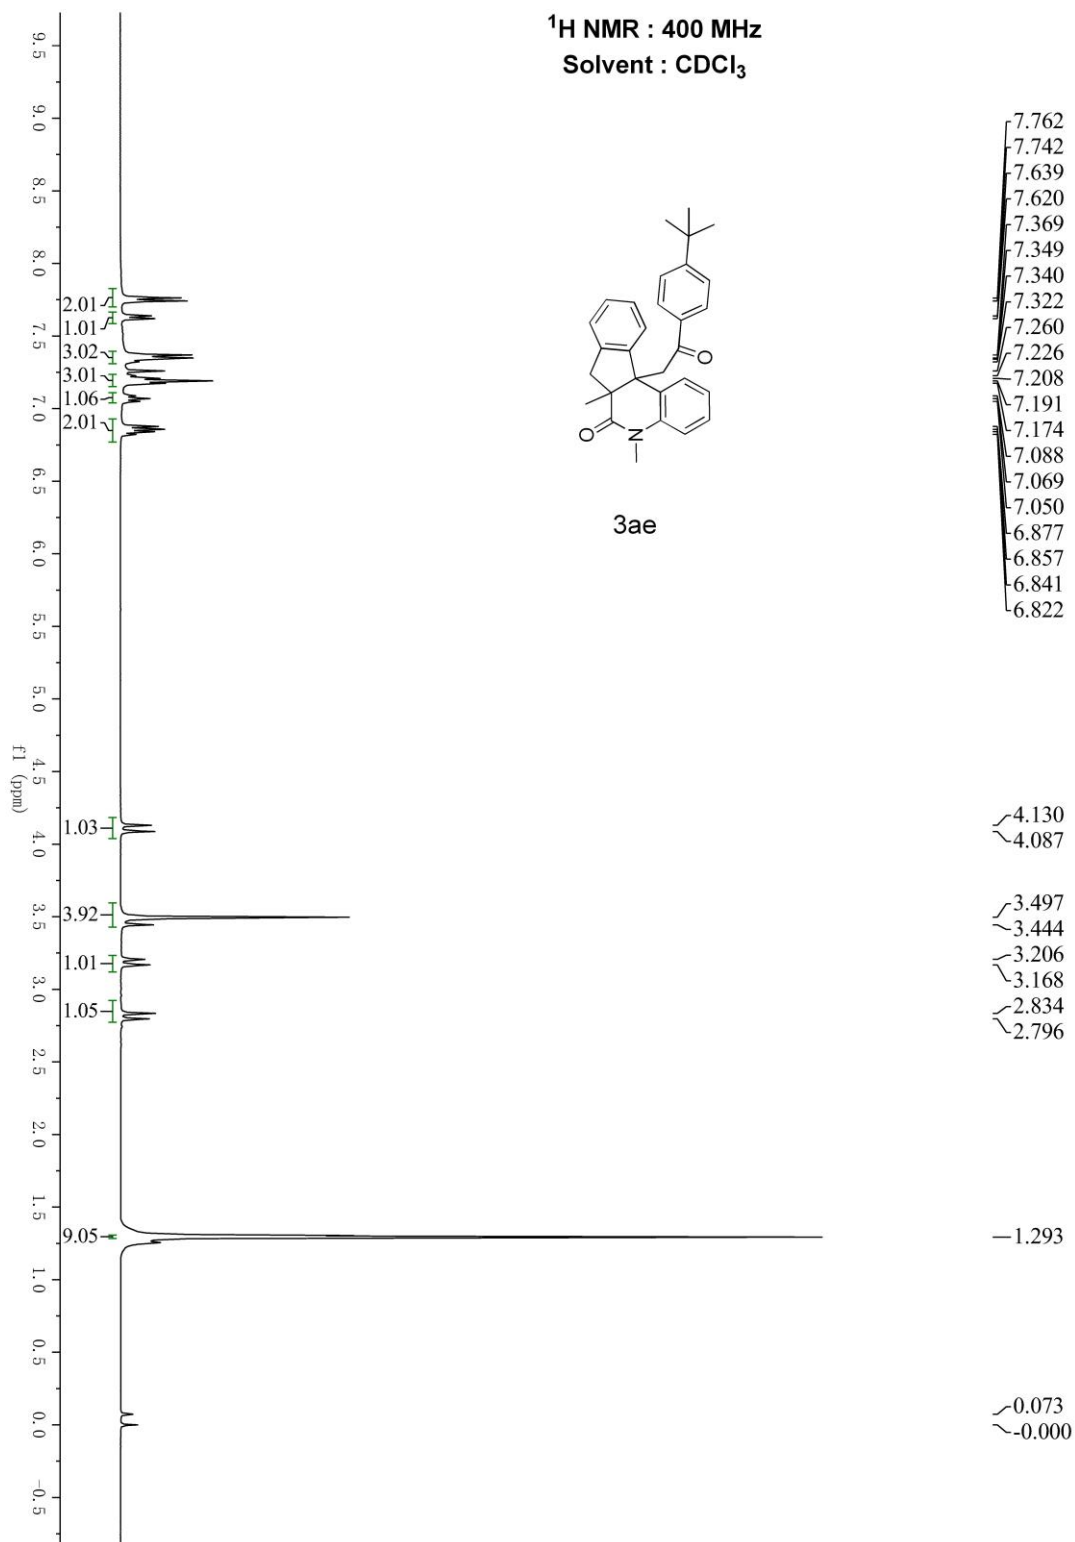

$^{13}\text{C}$   $\{^1\text{H}\}$  NMR : 100 MHz  
Solvent :  $\text{CDCl}_3$

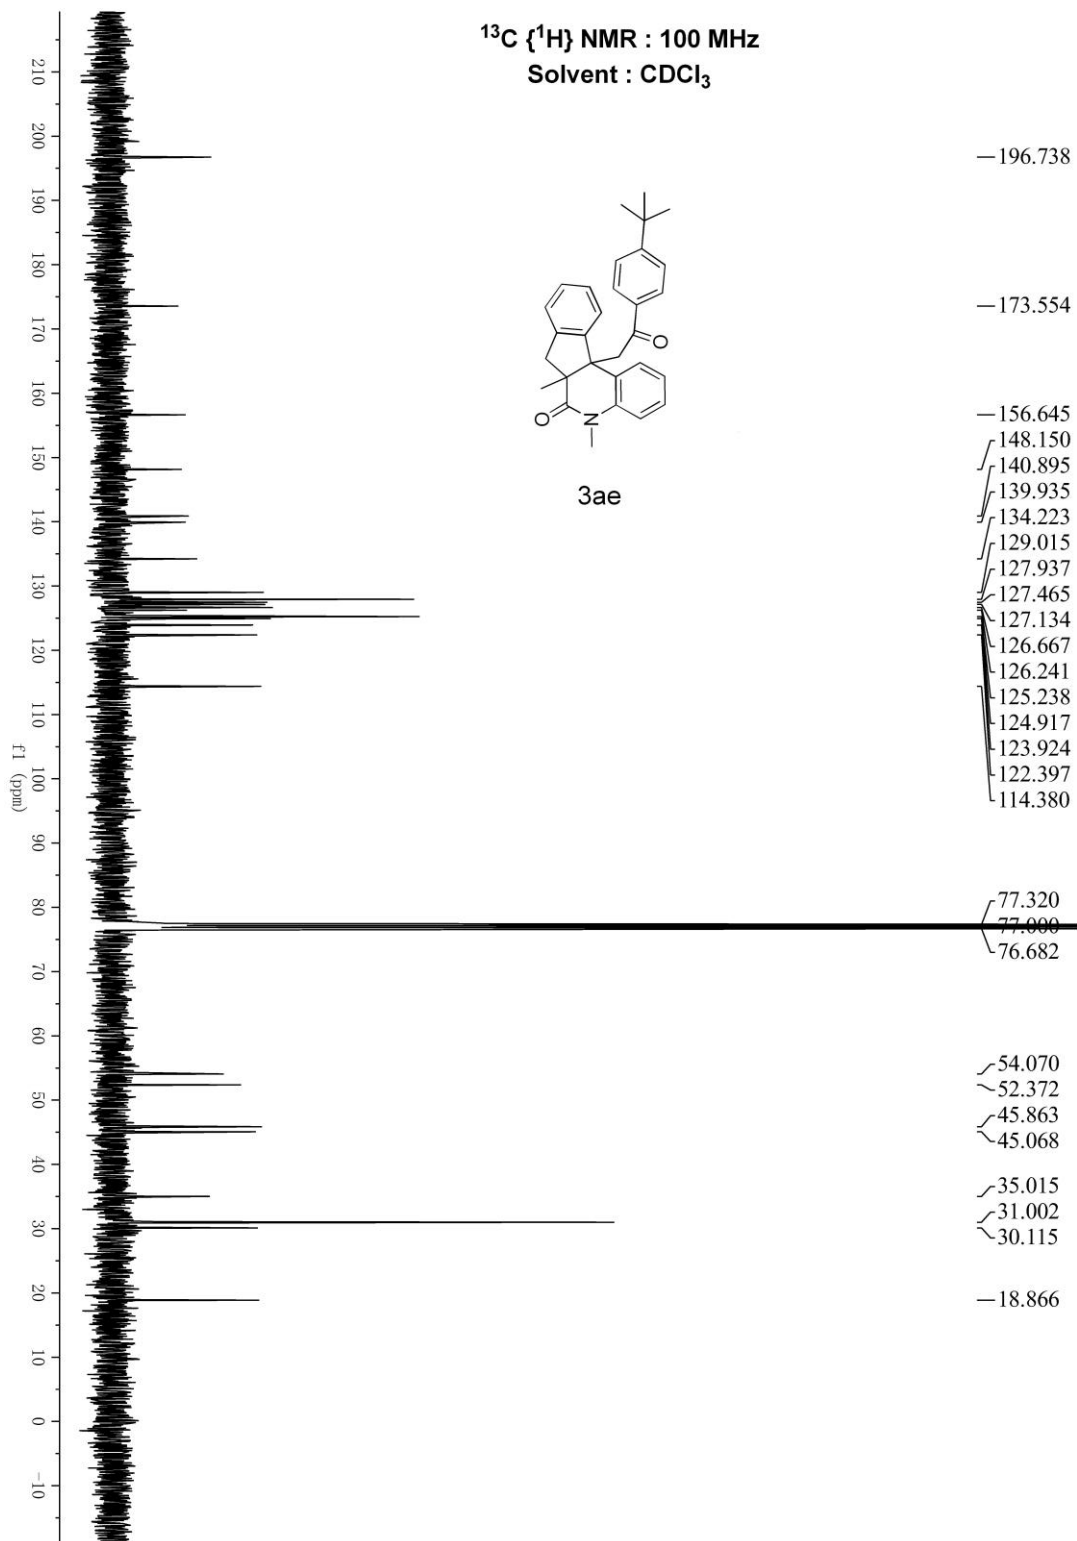

11b-(2-(4-fluorophenyl)-2-oxoethyl)-5,6a-dimethyl-5,6a,7,11b-tetrahydro-6H-inde  
no[2,1-c]quinolin-6-one (3af)

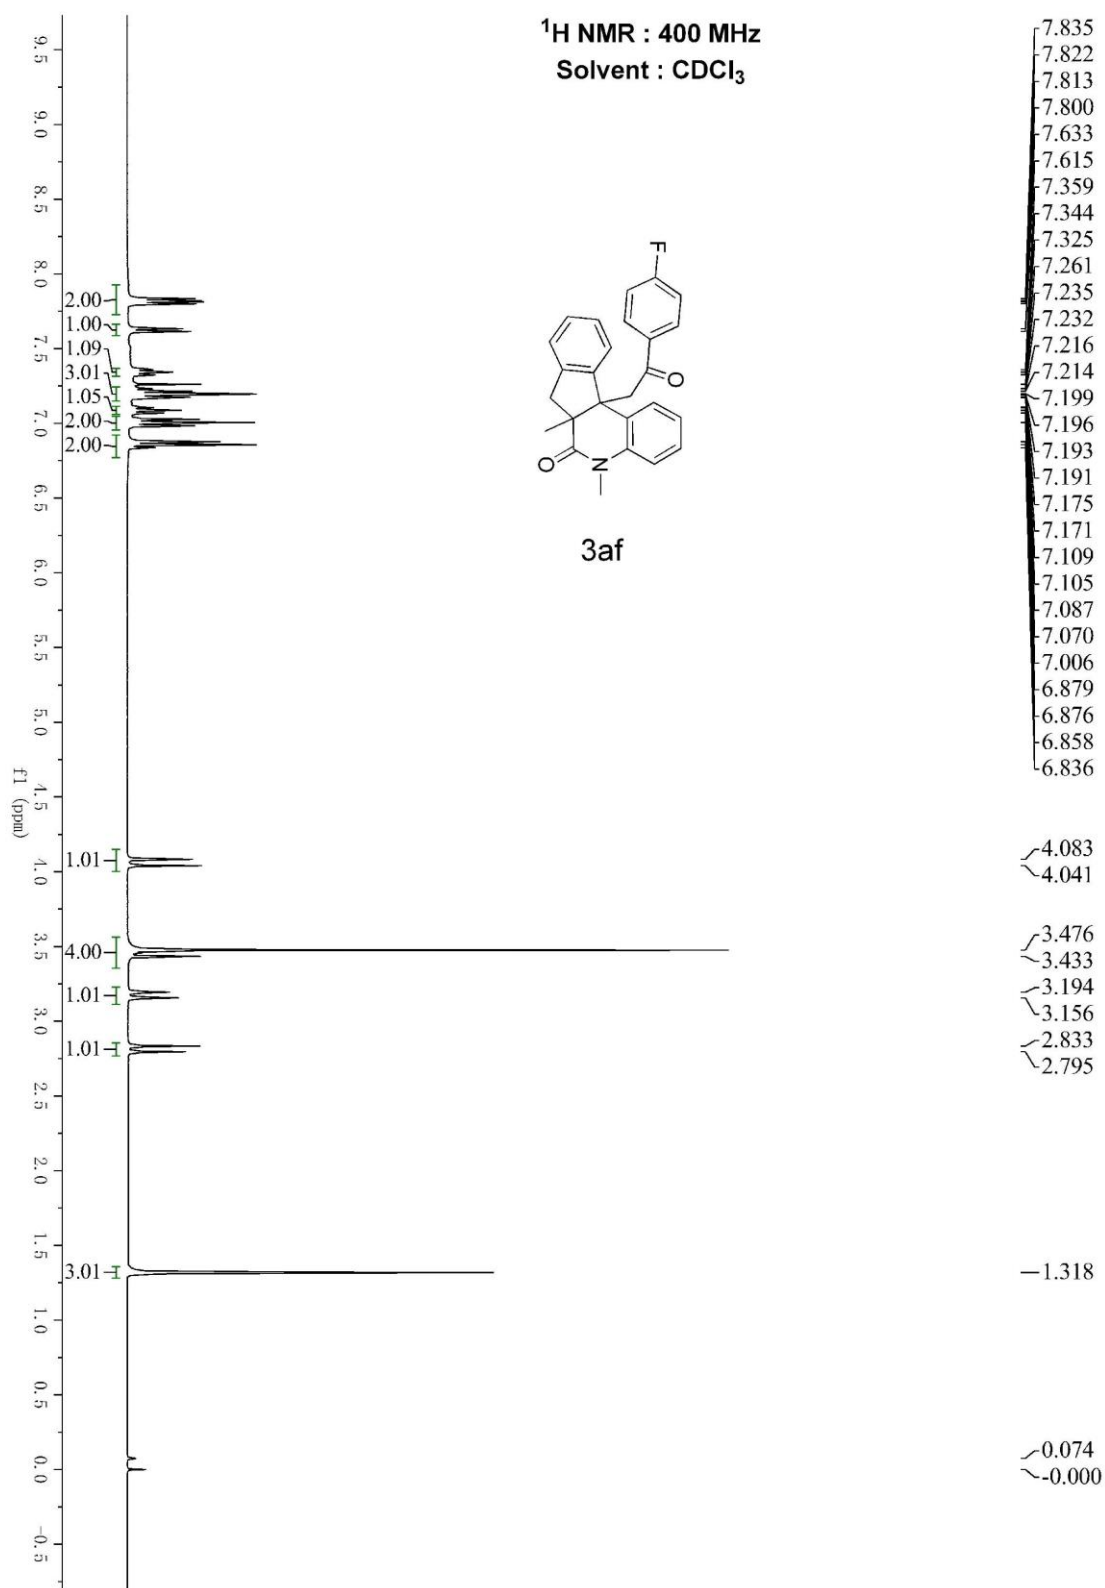

**<sup>19</sup>F NMR : 282 MHz**  
**Solvent : CDCl<sub>3</sub>**

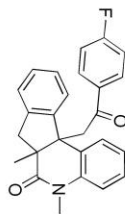

**3af**

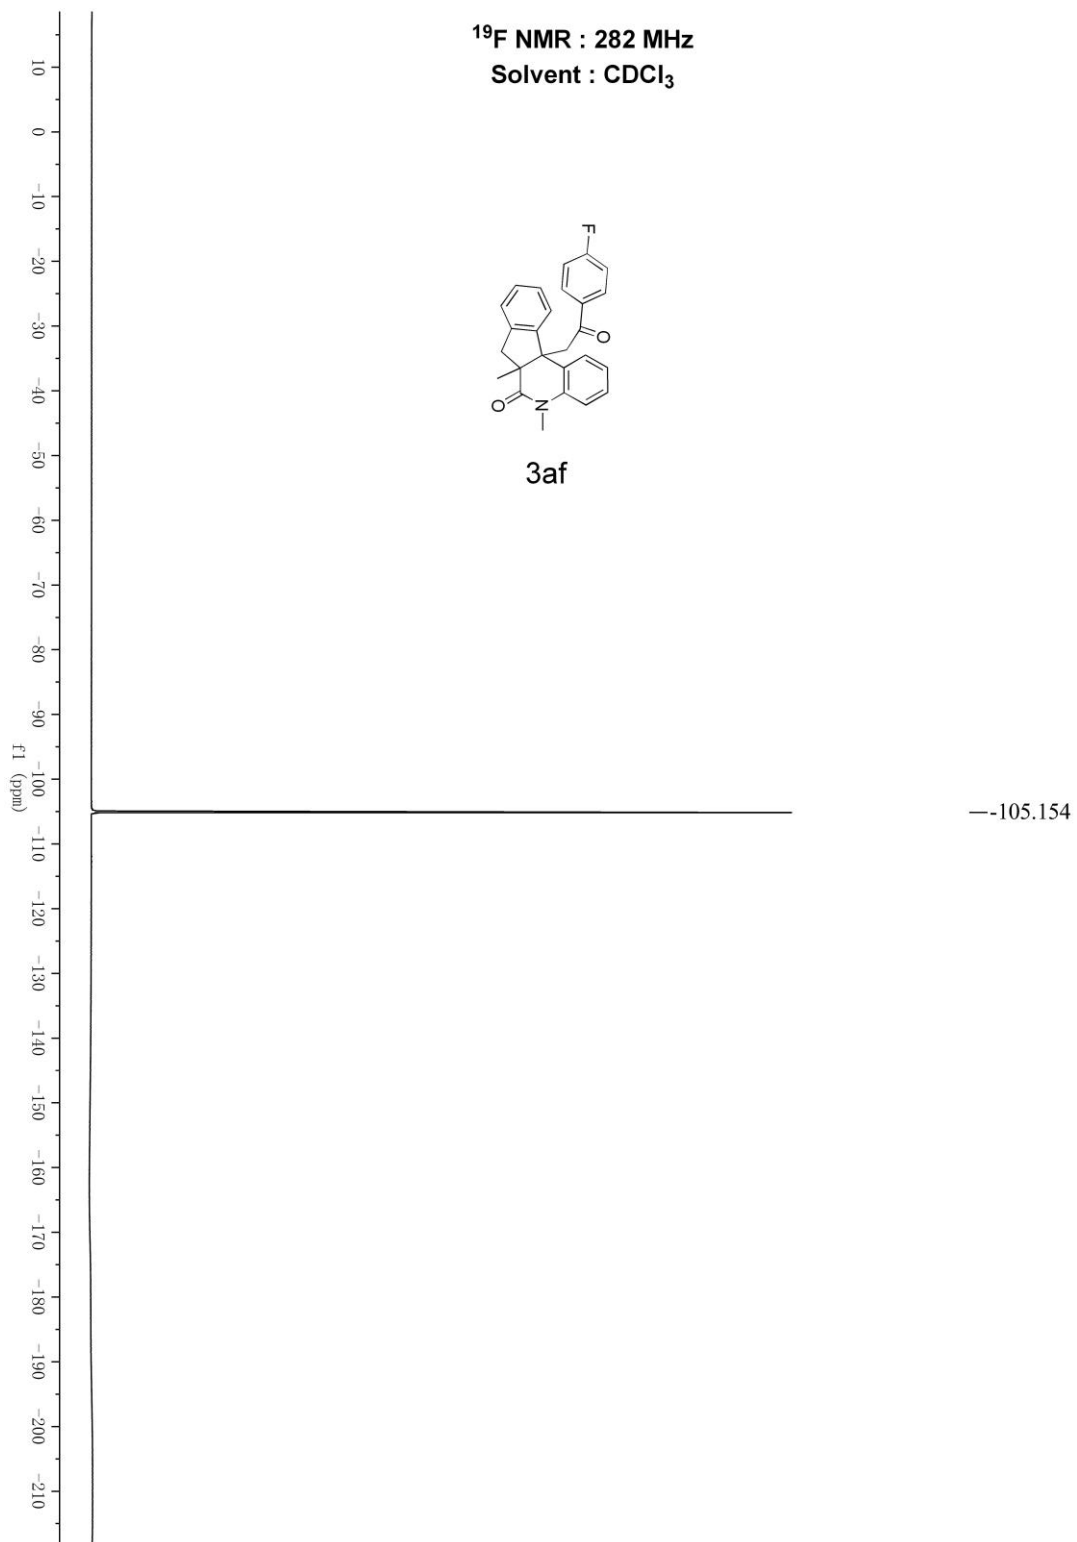

$^{13}\text{C} \{^1\text{H}\}$  NMR : 100 MHz  
Solvent :  $\text{CDCl}_3$

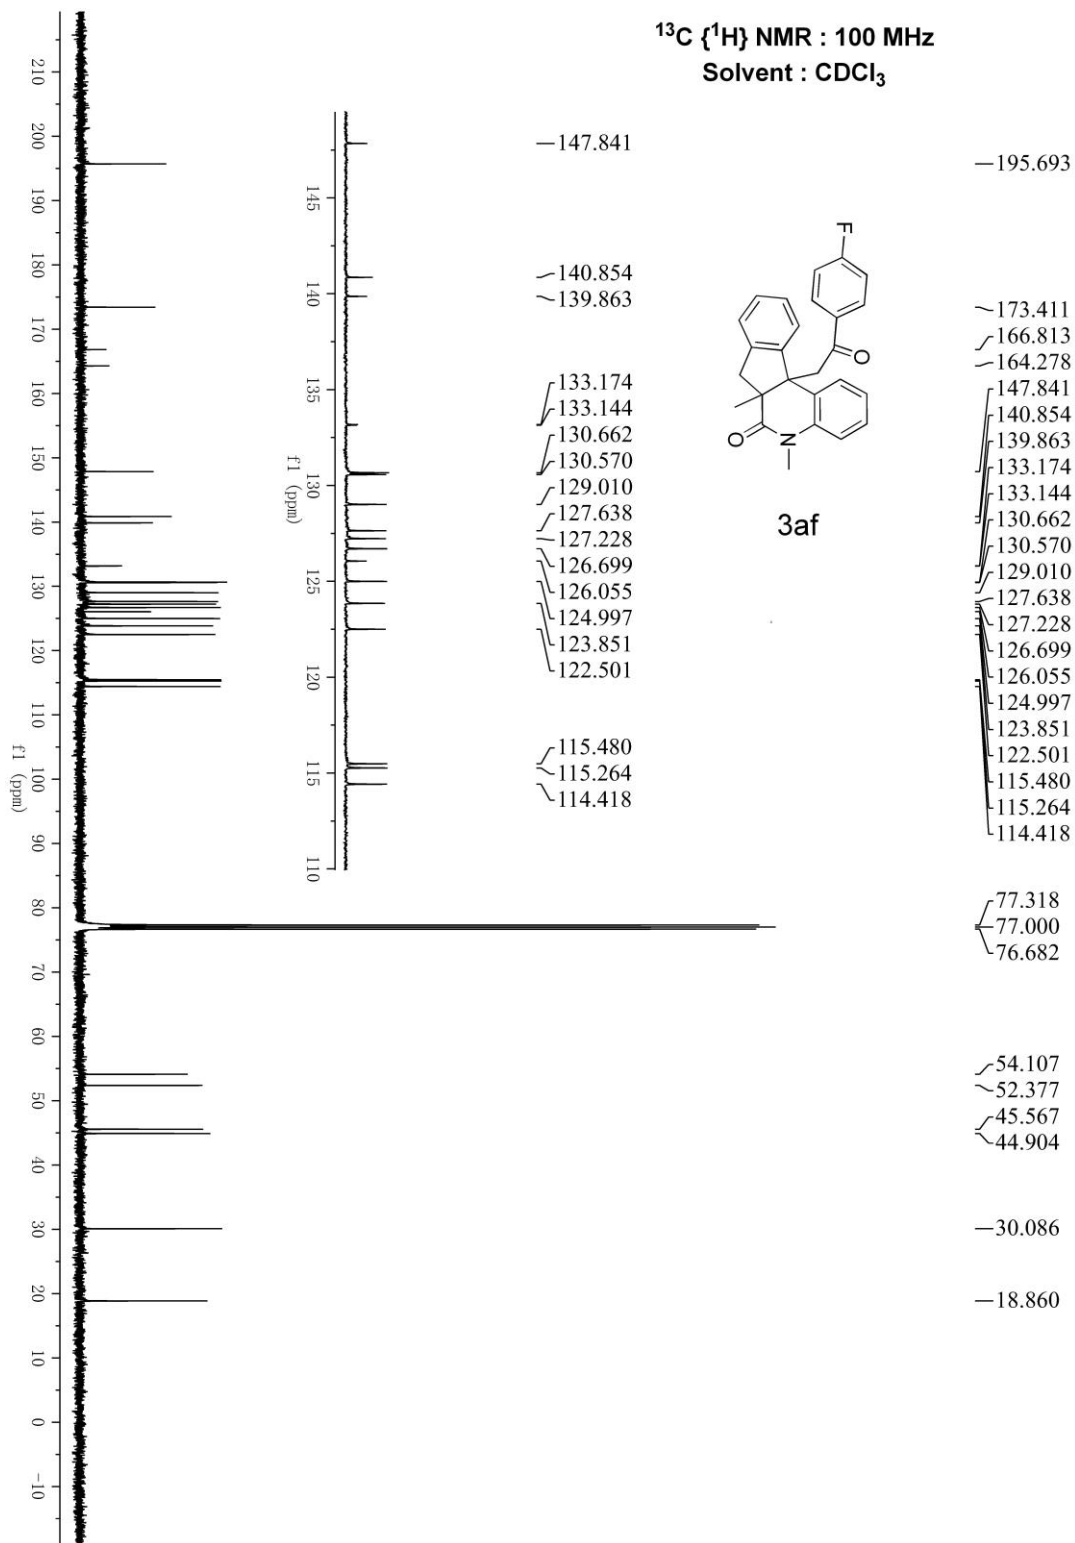

**11b-(2-(4-chlorophenyl)-2-oxoethyl)-5,6a-dimethyl-5,6a,7,11b-tetrahydro-6H-indeno[2,1-c]quinolin-6-one (3ag)**

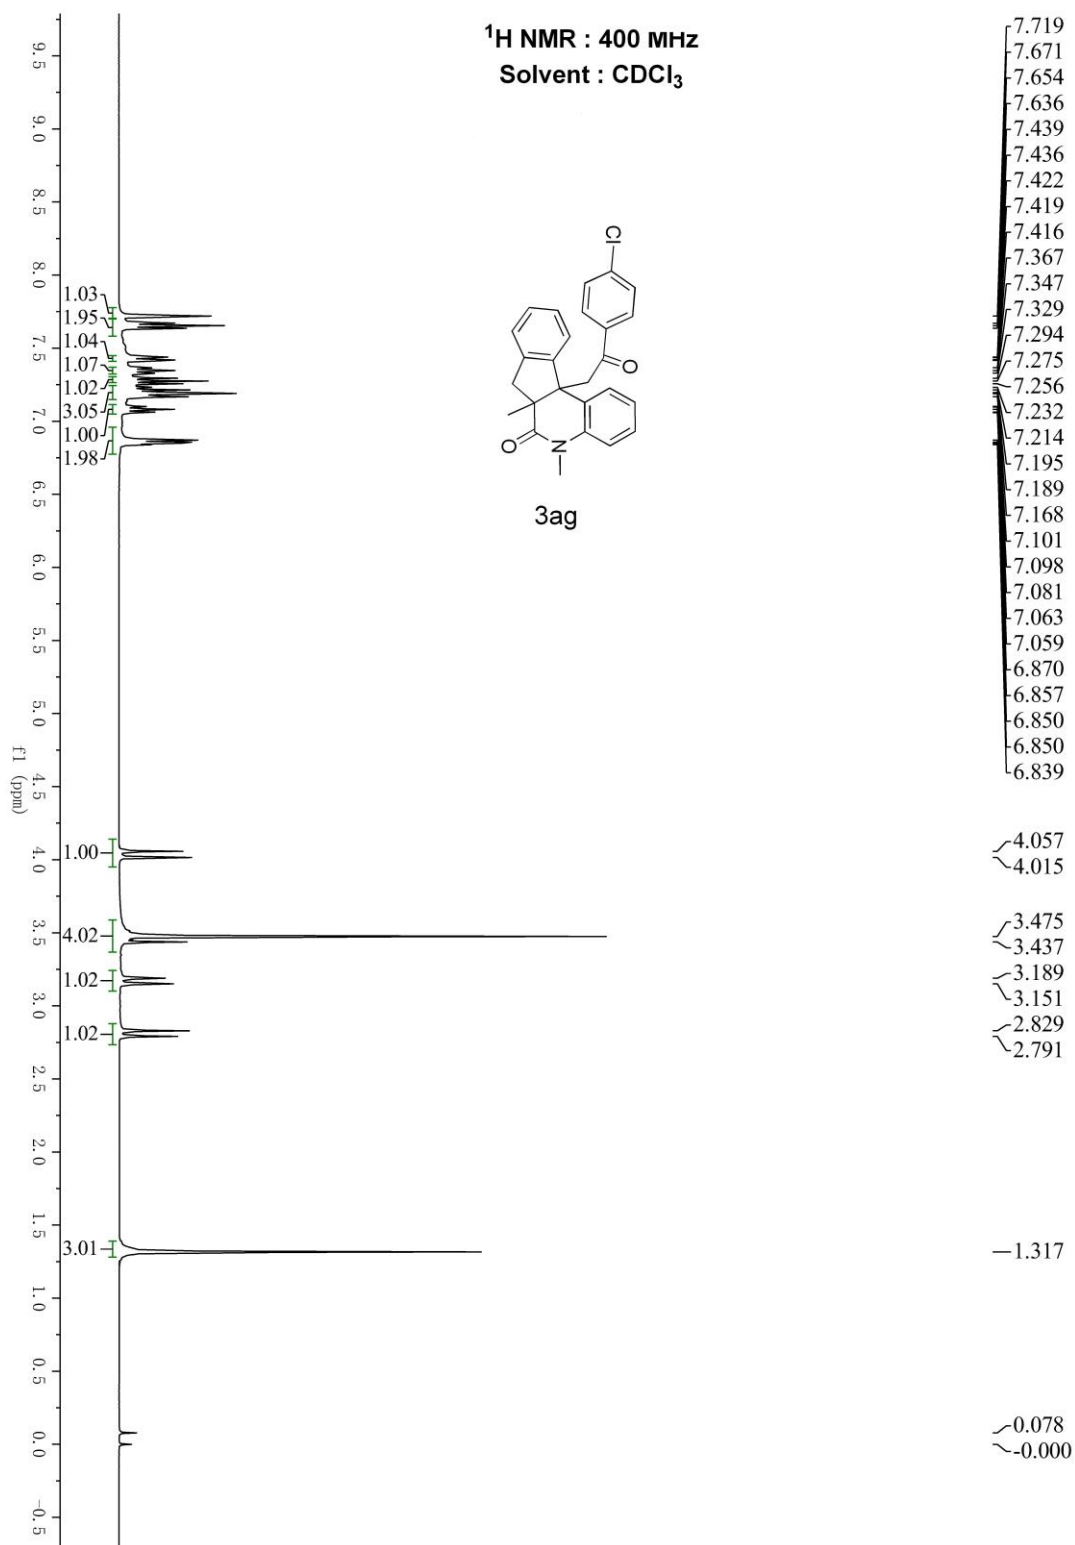



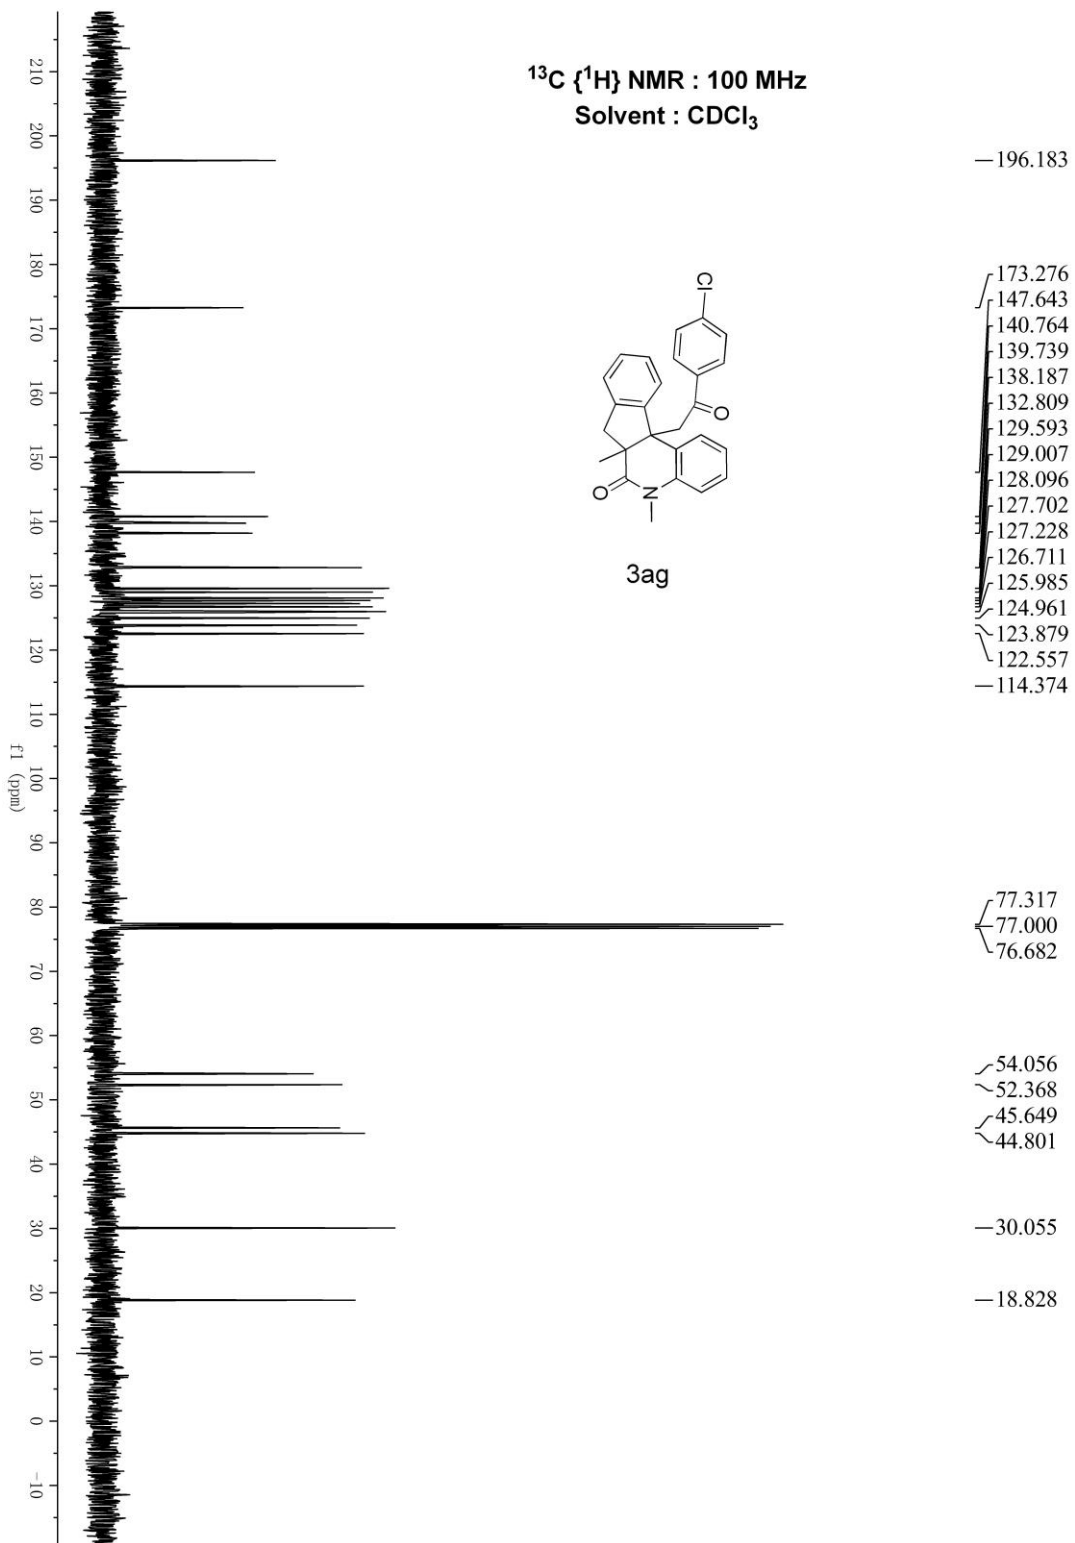

**11b-(2-(4-bromophenyl)-2-oxoethyl)-5,6a-dimethyl-5,6a,7,11b-tetrahydro-6H-indeno[2,1-c]quinolin-6-one (3ah)**

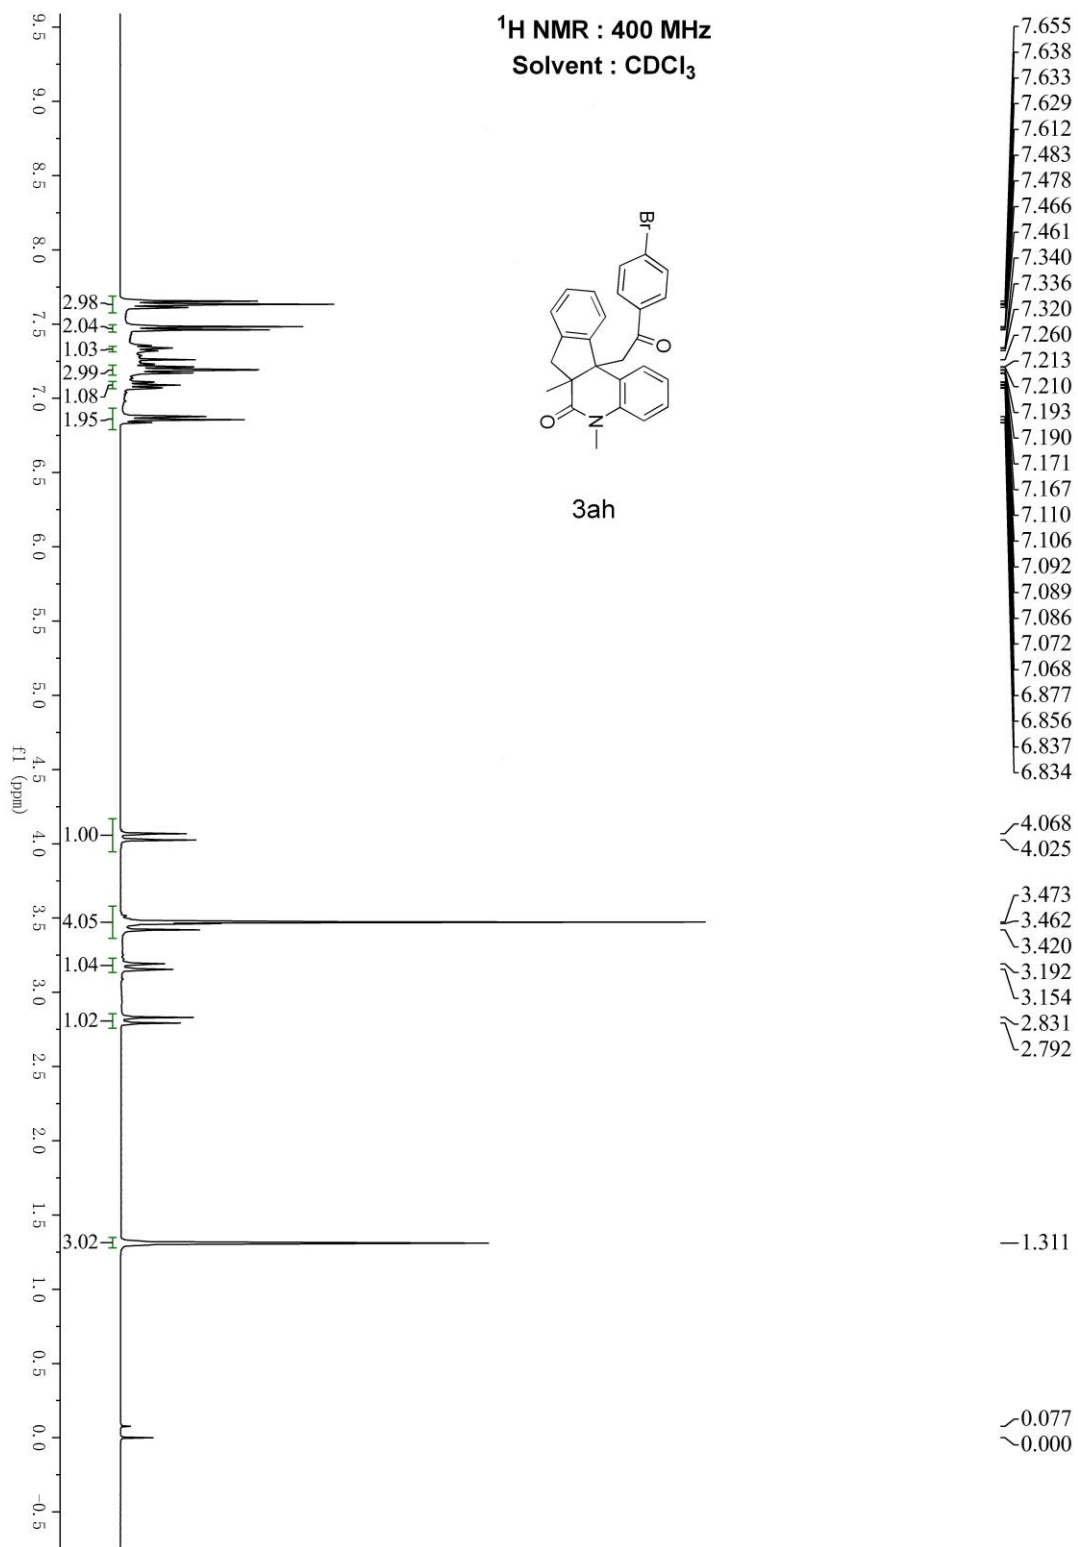

$^{13}\text{C} \{^1\text{H}\}$  NMR : 100 MHz  
Solvent :  $\text{CDCl}_3$

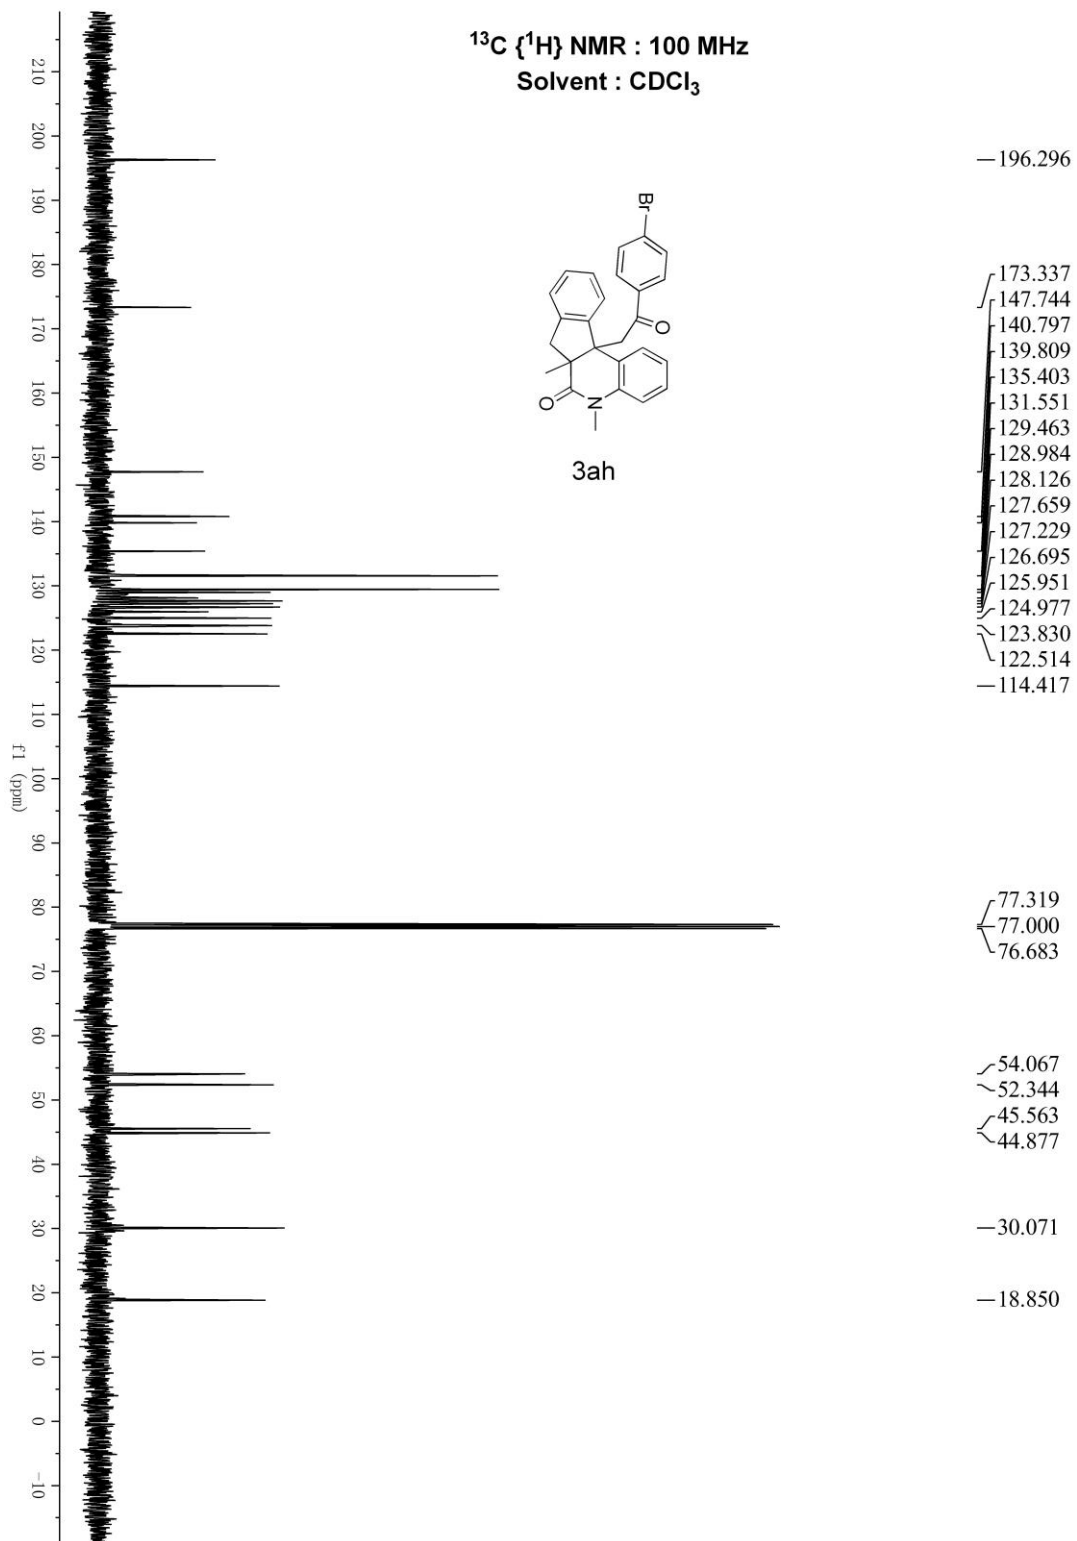

**5,6a-dimethyl-11b-(2-oxo-2-phenylethyl)-5,6a,7,11b-tetrahydro-6H-indeno[2,1-c]quinolin-6-one (3ai)**

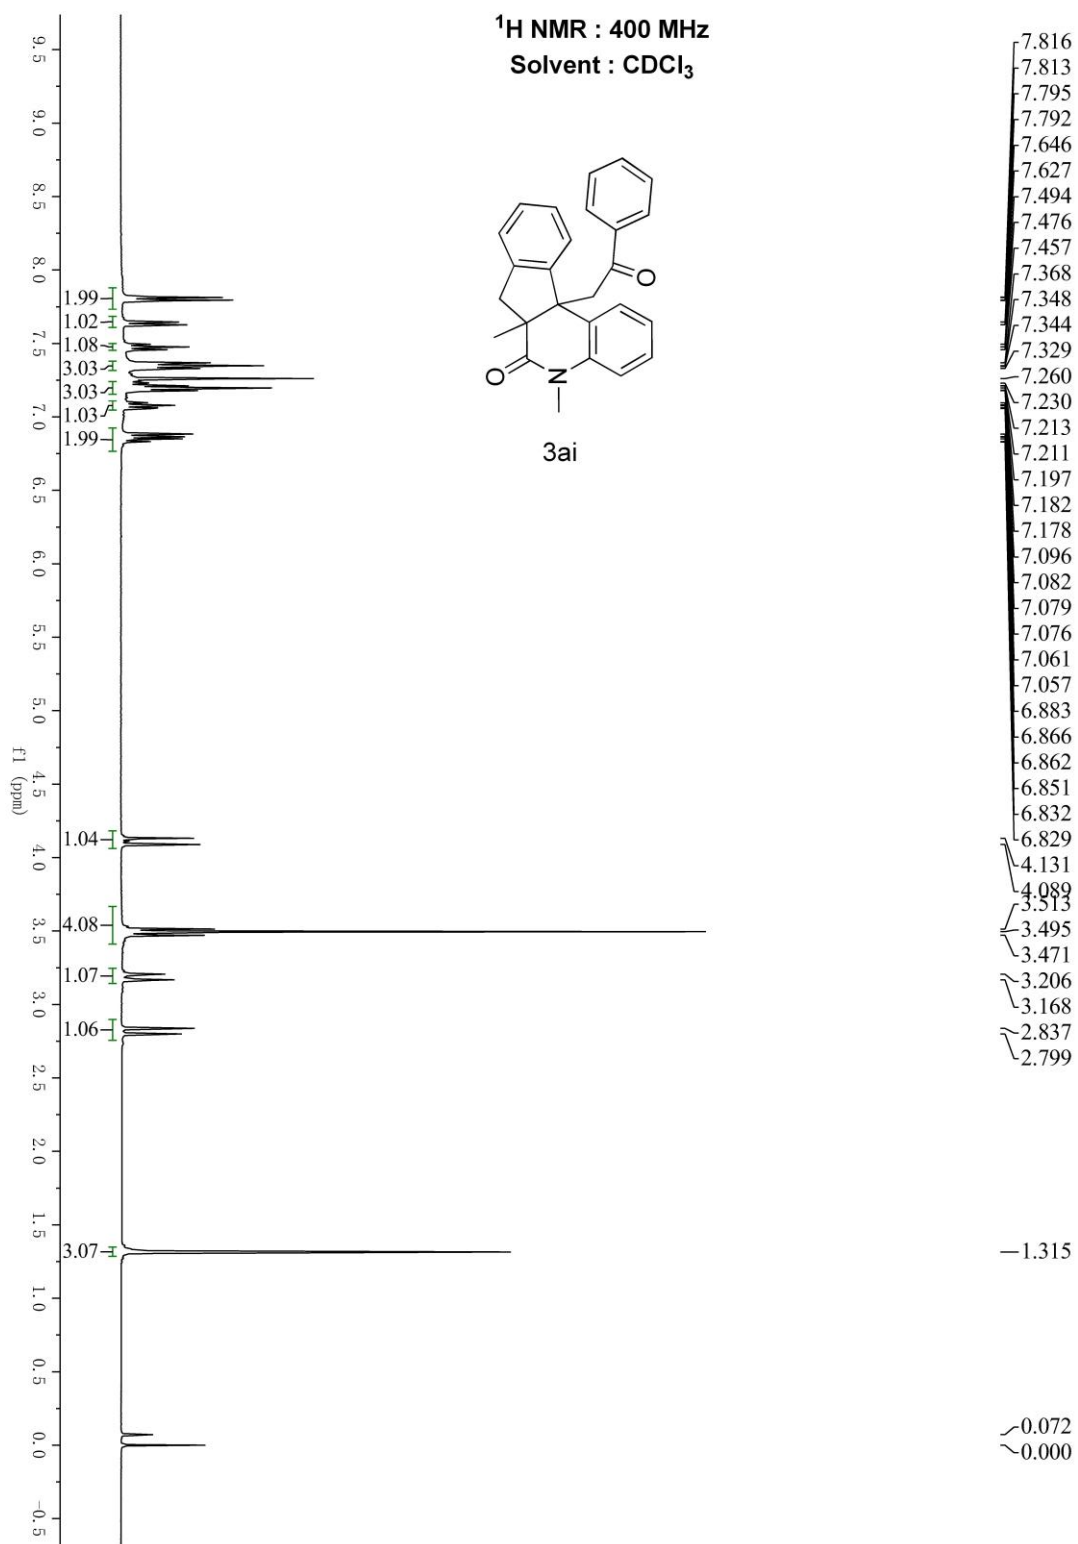

$^{13}\text{C}$   $\{^1\text{H}\}$  NMR : 100 MHz  
Solvent :  $\text{CDCl}_3$

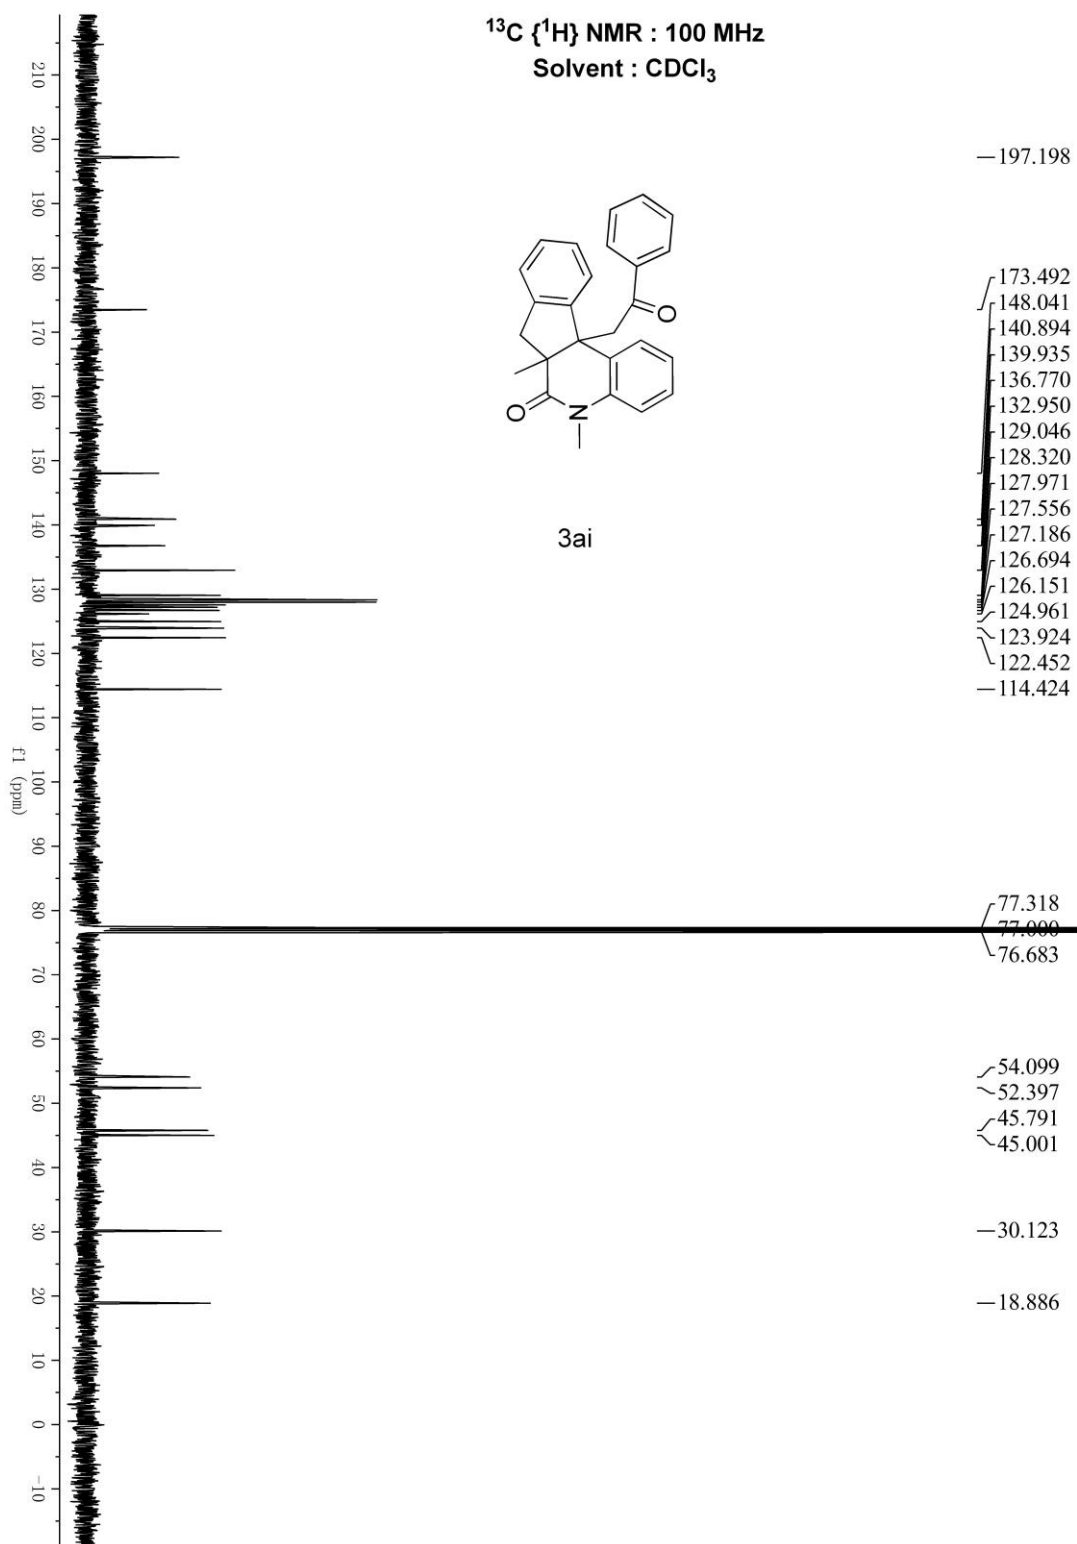

**5,6a-dimethyl-11b-(2-oxo-2-(4-(trifluoromethyl)phenyl)ethyl)-5,6a,7,11b-tetrahydro-6H-indeno[2,1-c]quinolin-6-one (3aj)**

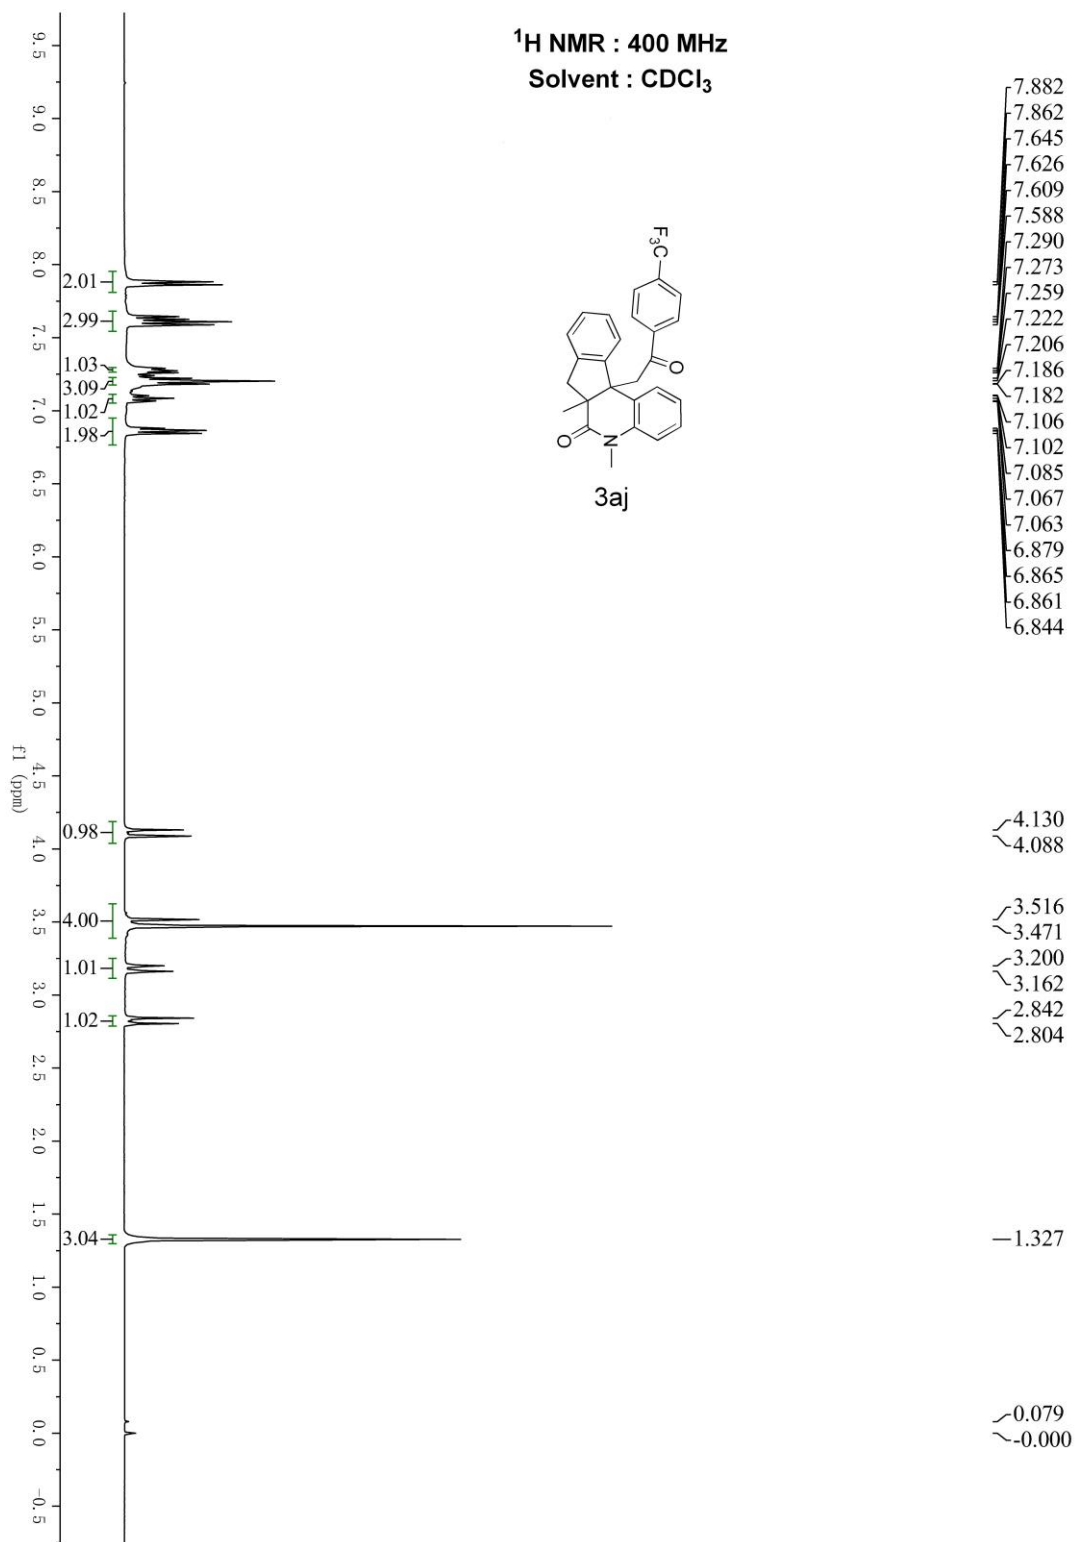

$^{19}\text{F}$  NMR : 282 MHz  
Solvent :  $\text{CDCl}_3$

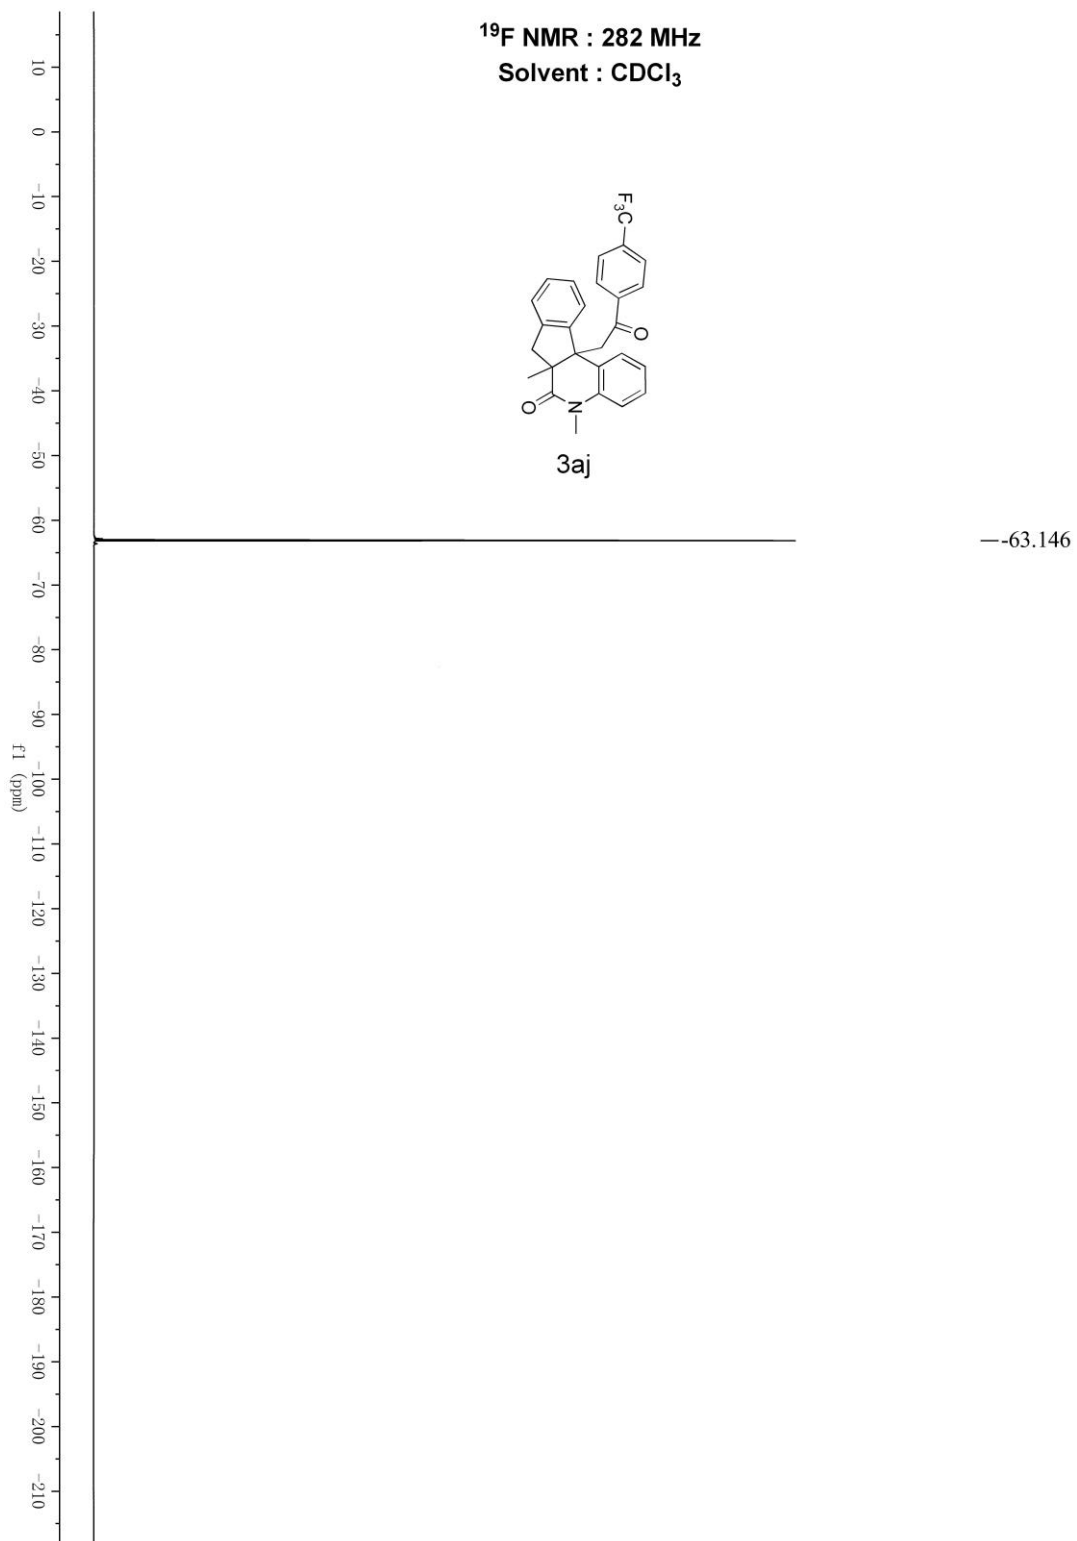

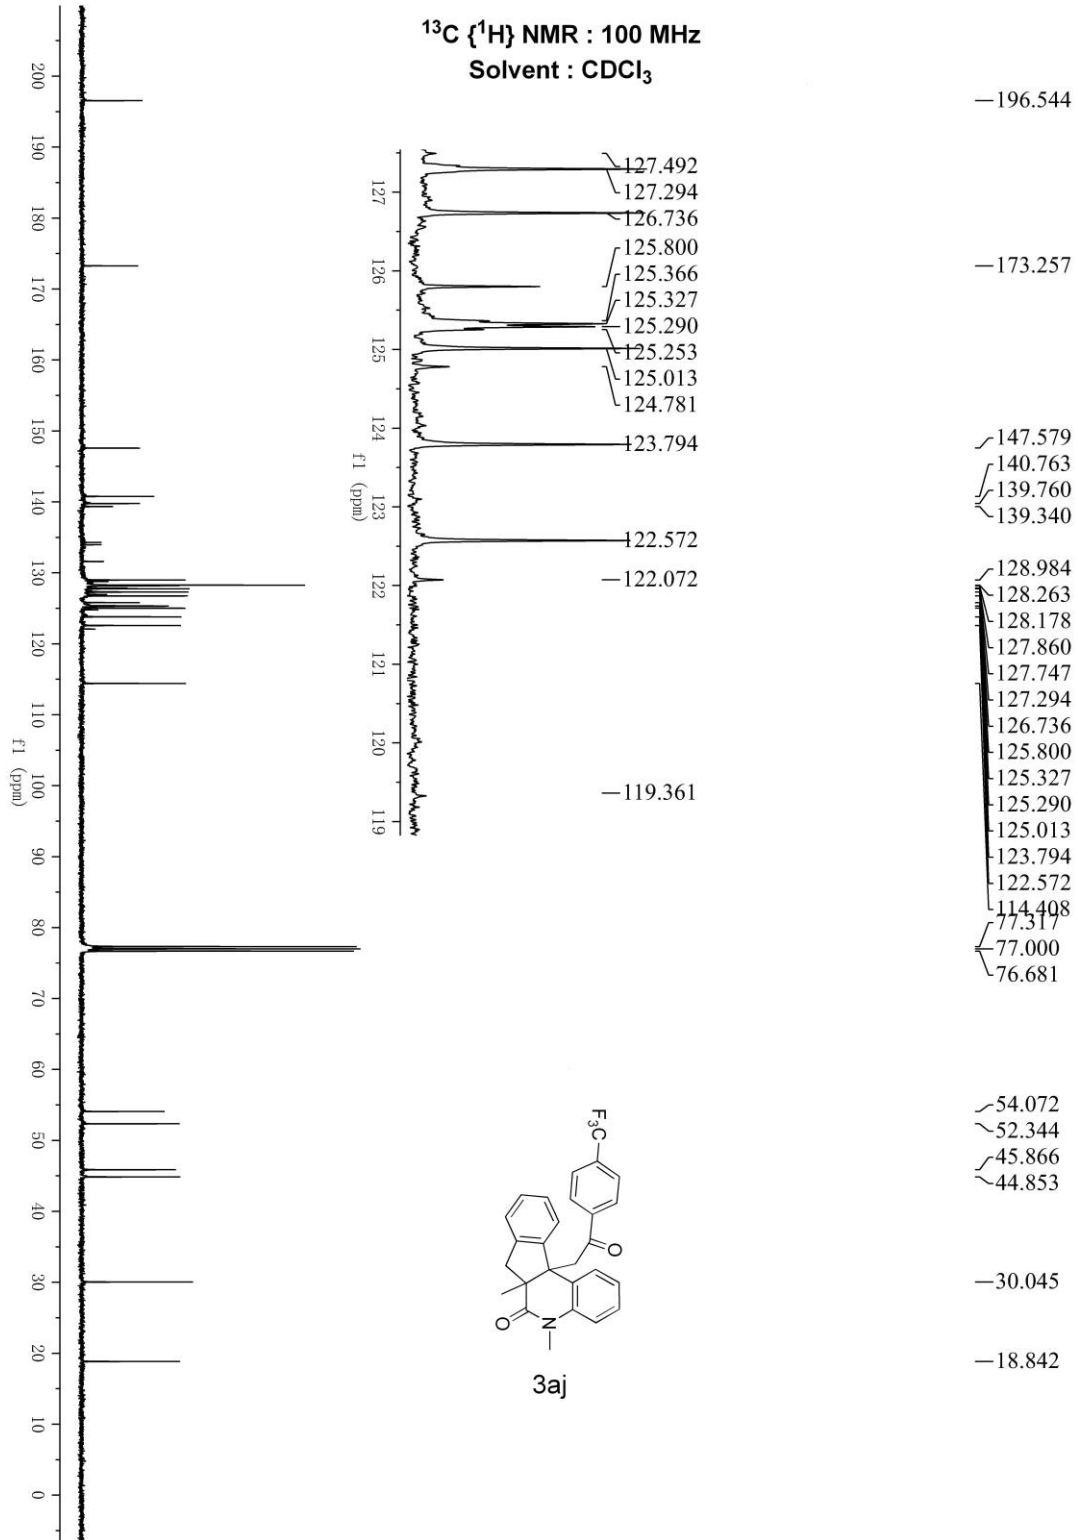



**11b-(2-(3-methoxyphenyl)-2-oxoethyl)-5,6a-dimethyl-5,6a,7,11b-tetrahydro-6H-indeno[2,1-c]quinolin-6-one (3ak)**

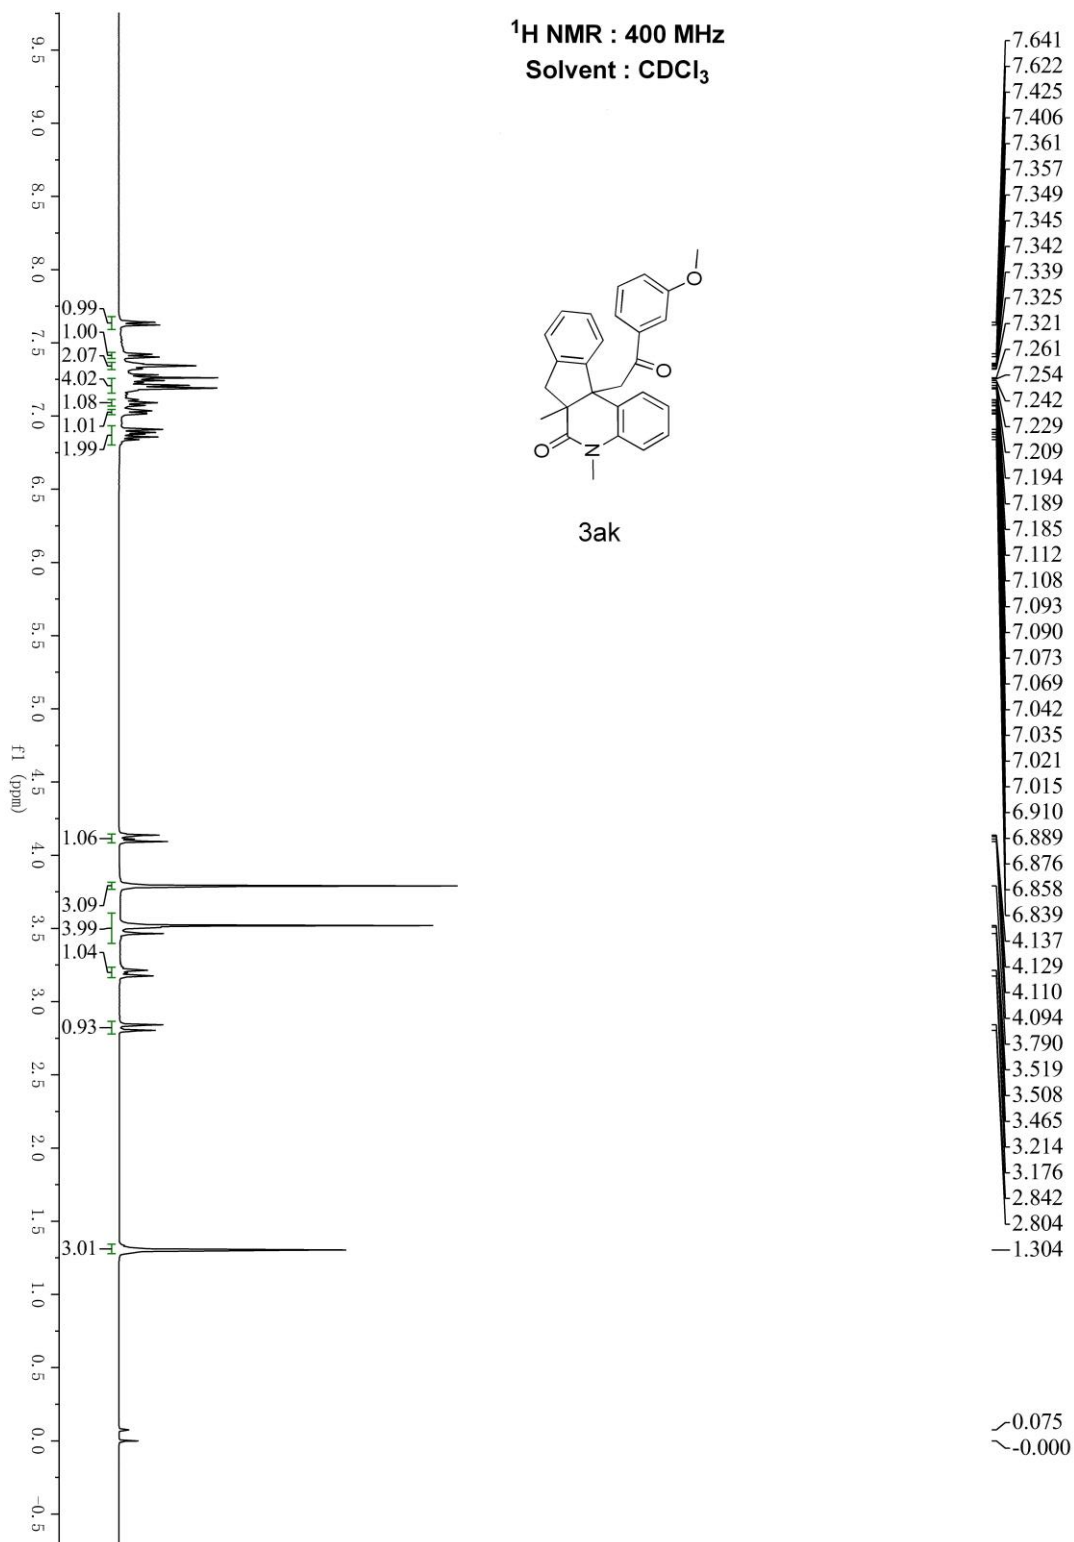

$^{13}\text{C}$   $\{^1\text{H}\}$  NMR : 100 MHz  
Solvent :  $\text{CDCl}_3$

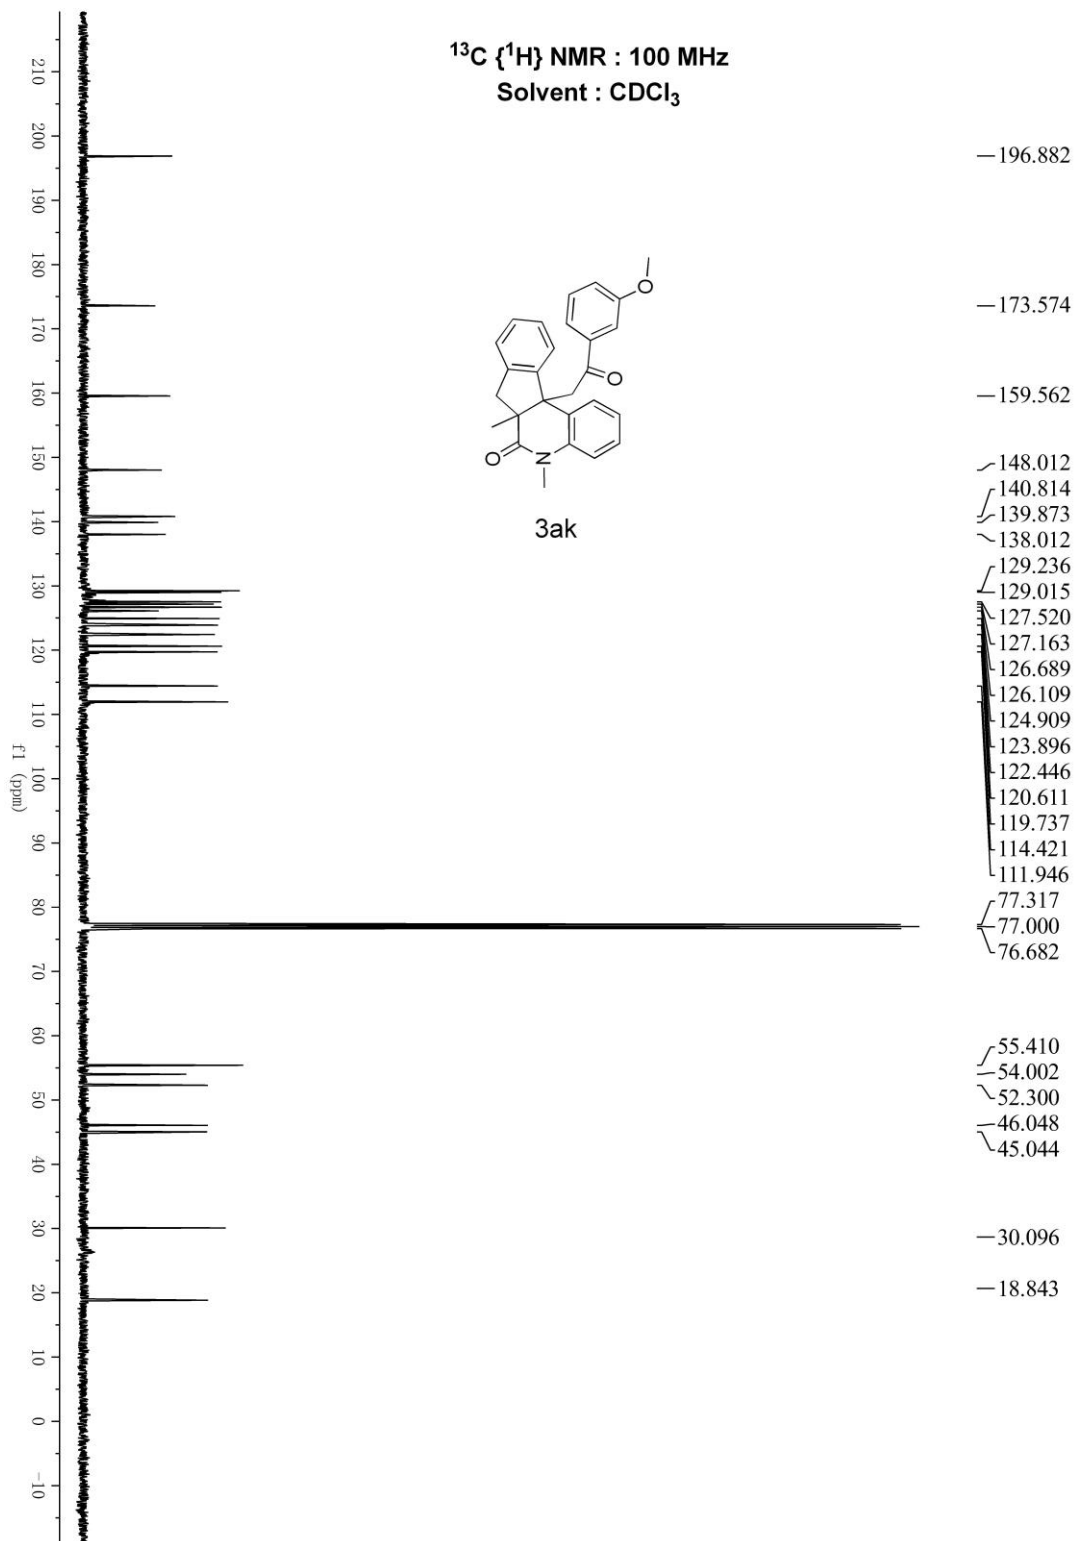

**11b-(2-(3-chlorophenyl)-2-oxoethyl)-5,6a-dimethyl-5,6a,7,11b-tetrahydro-6H-indeno[2,1-c]quinolin-6-one (3al)**

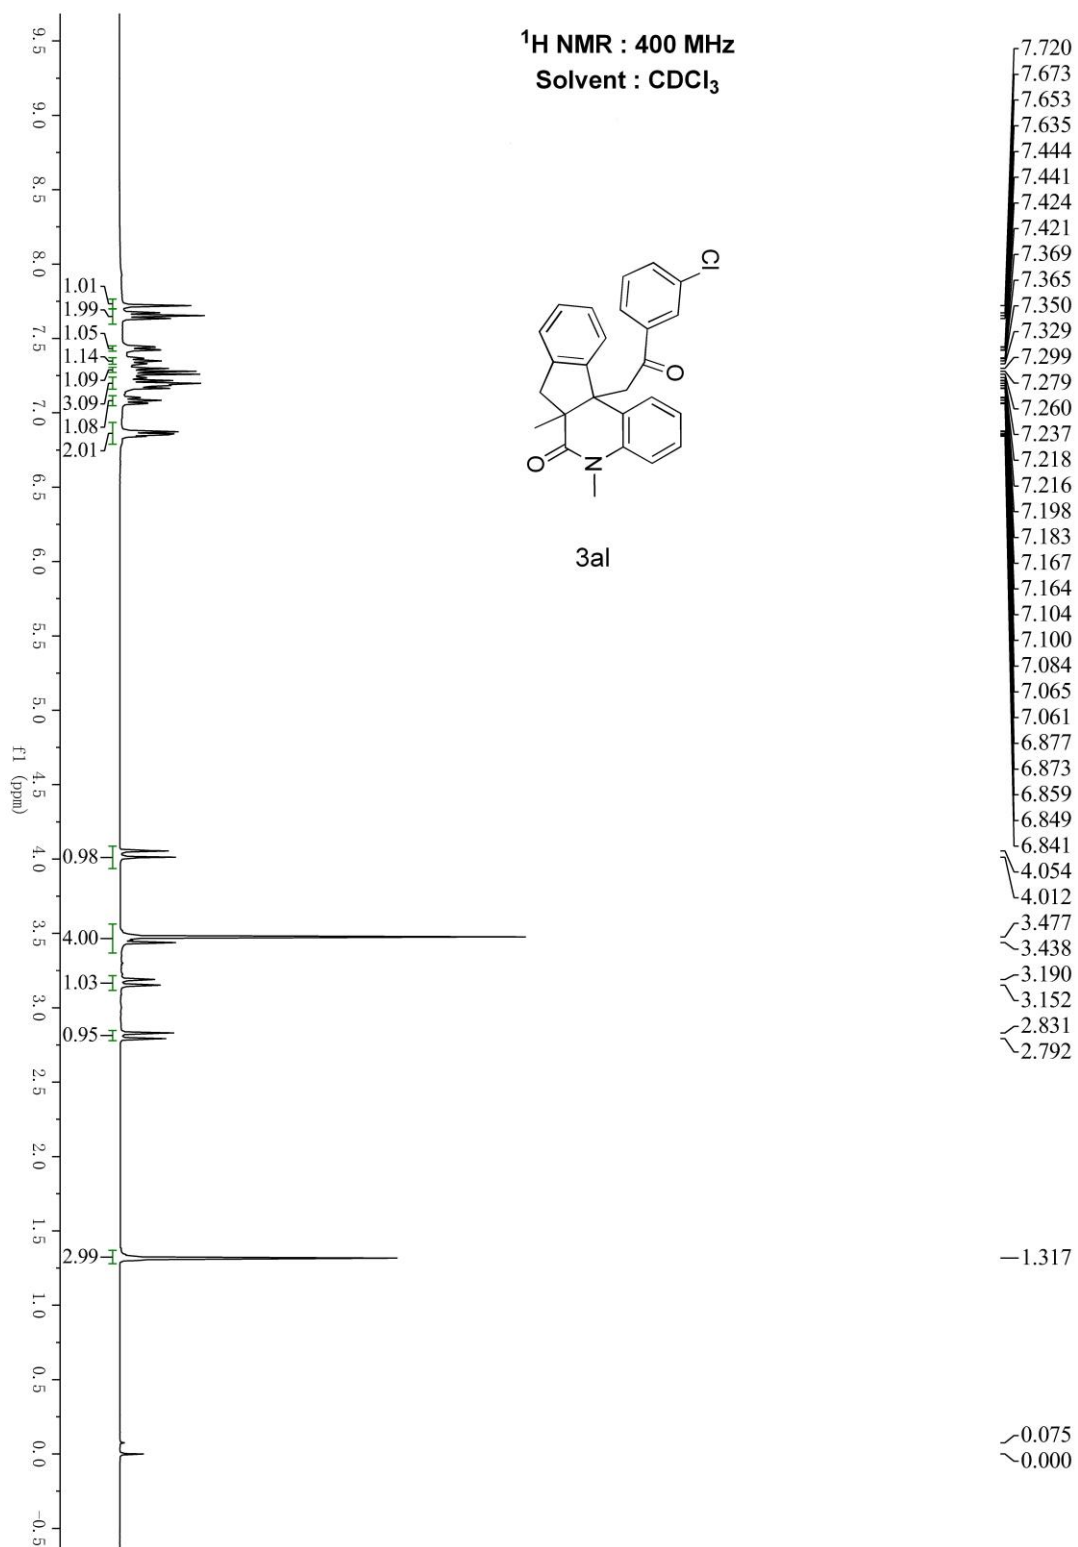

$^{13}\text{C}$   $\{^1\text{H}\}$  NMR : 100 MHz  
Solvent :  $\text{CDCl}_3$

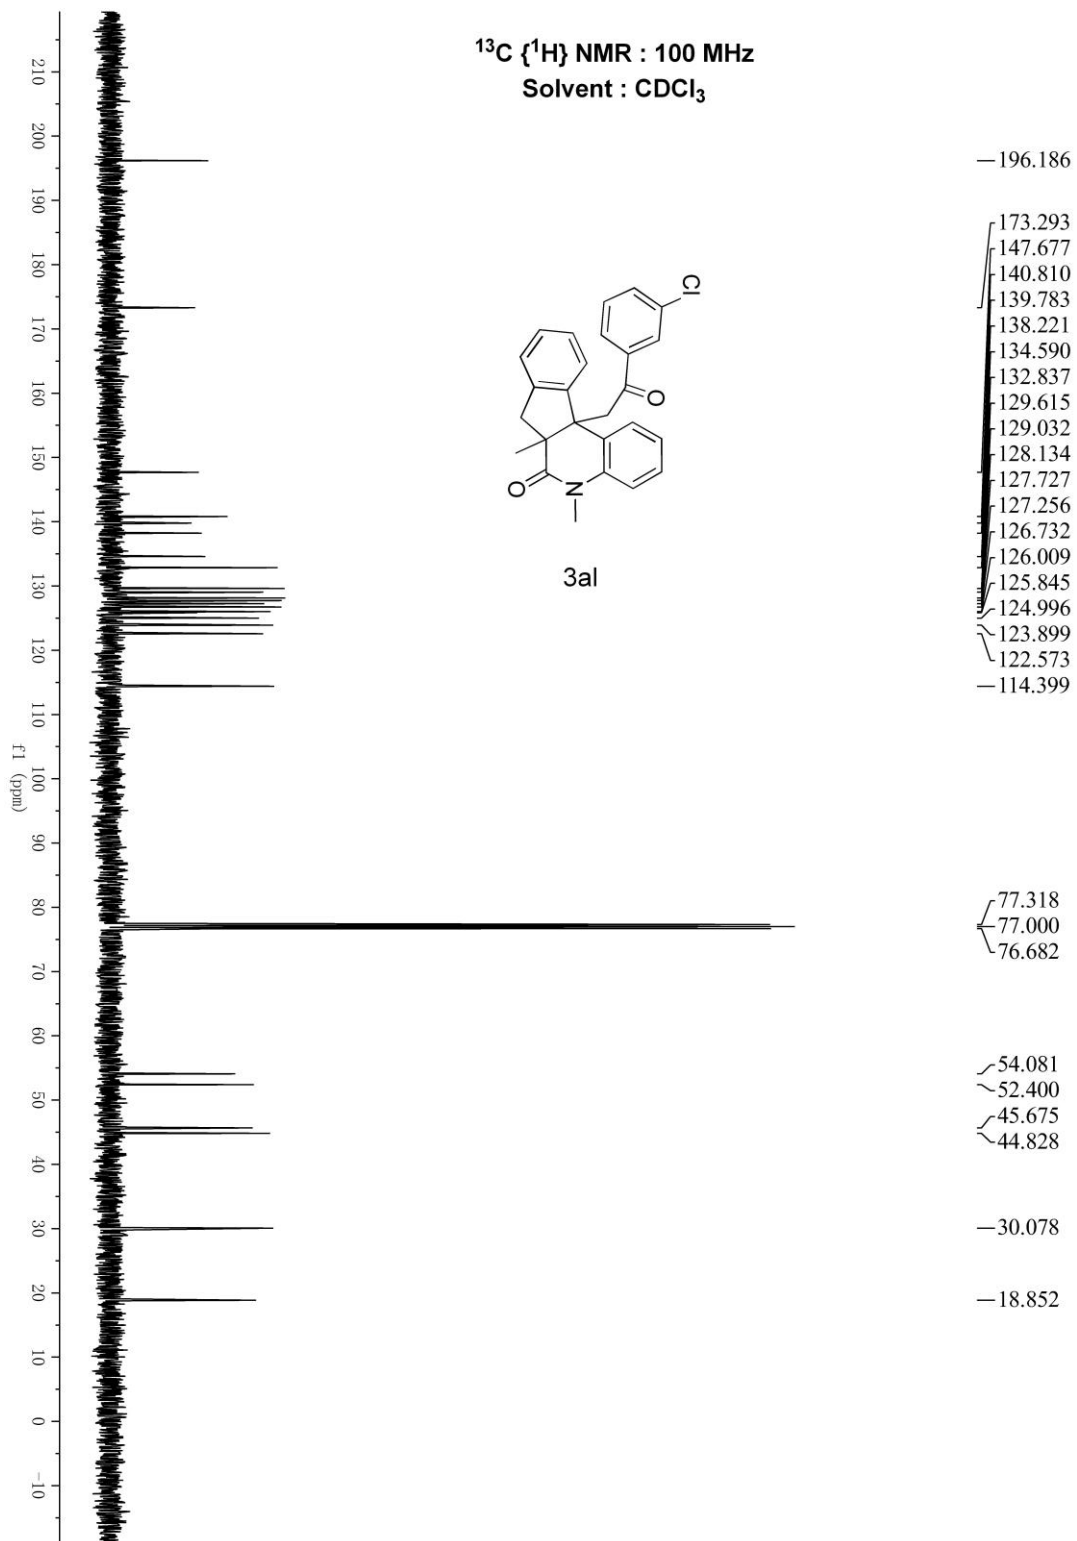

**5,6a-dimethyl-11b-(2-oxo-2-(o-tolyl)ethyl)-5,6a,7,11b-tetrahydro-6H-indeno[2,1-c]quinolin-6-one (3am)**

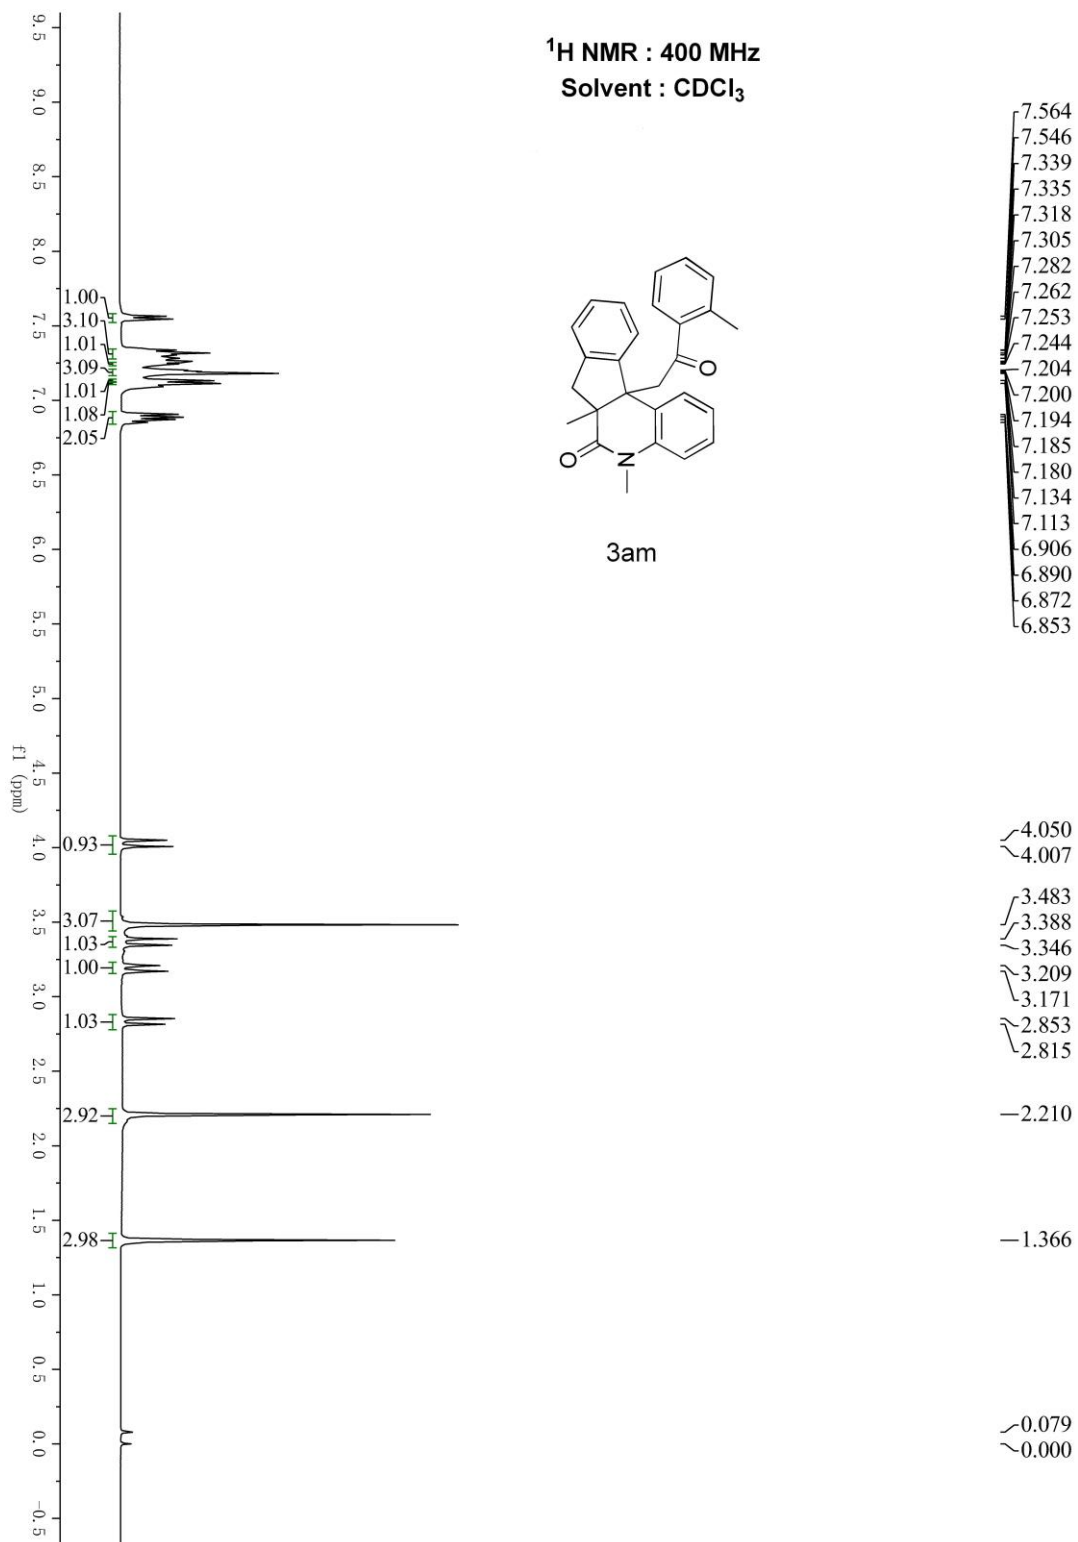

$^{13}\text{C}$   $\{^1\text{H}\}$  NMR : 100 MHz  
Solvent :  $\text{CDCl}_3$

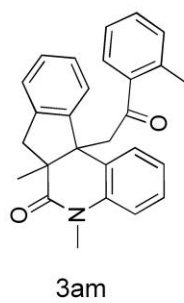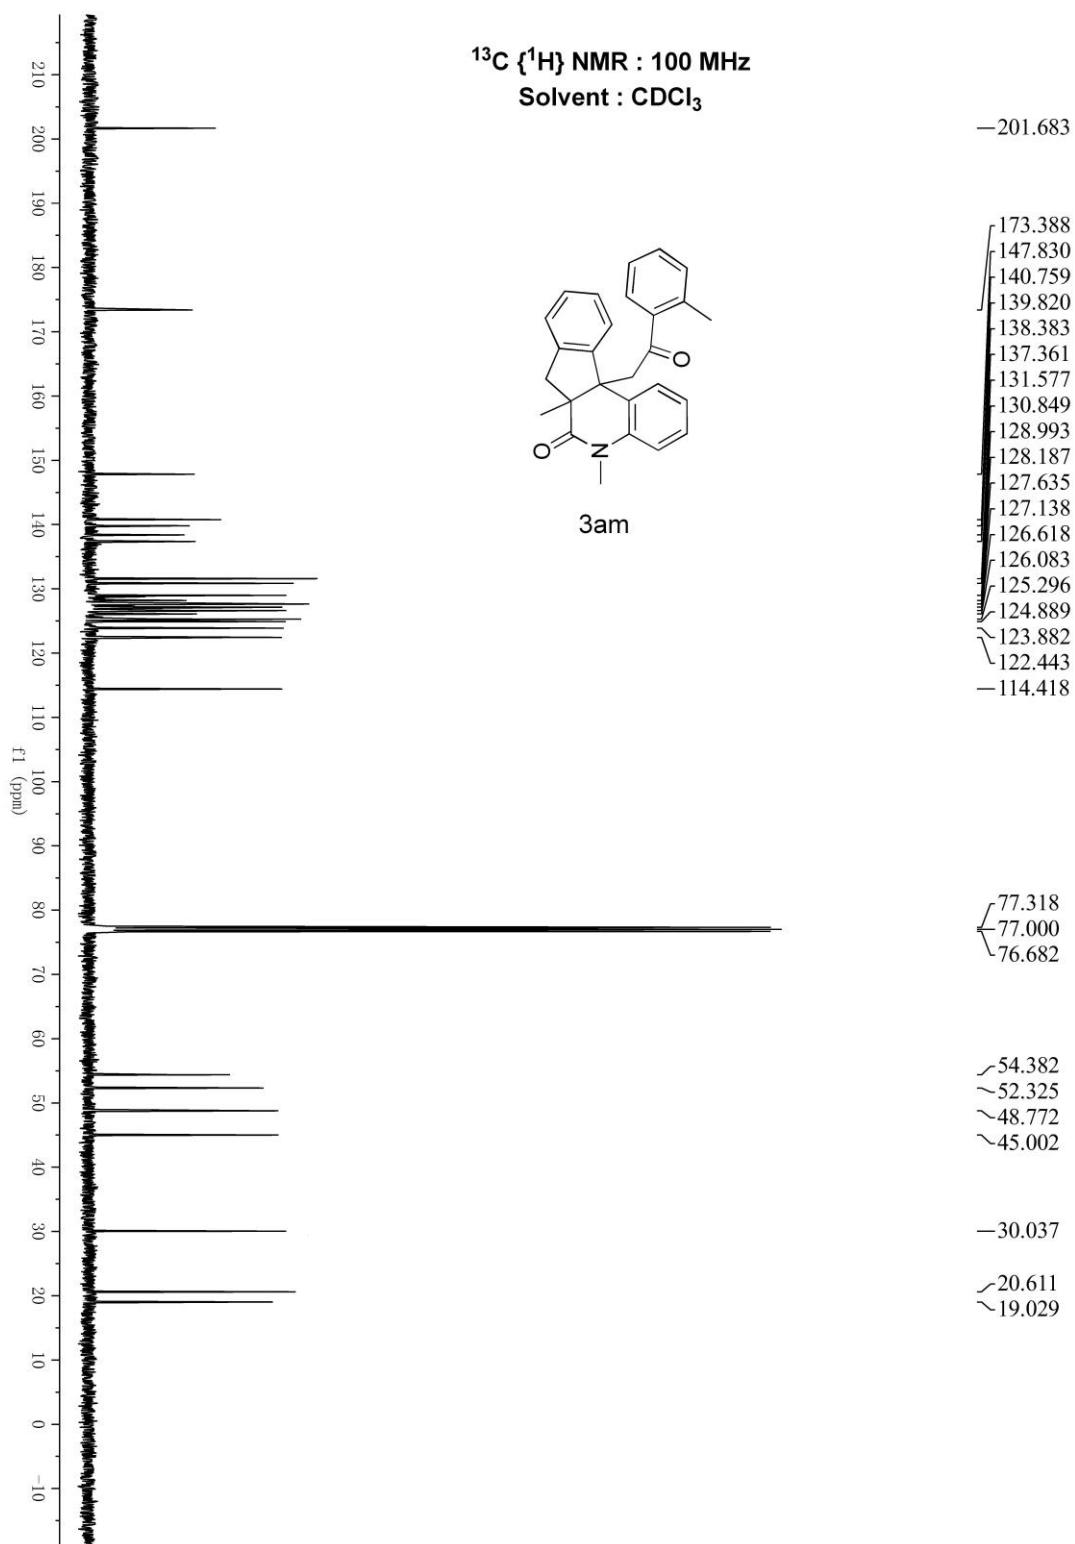

**11b-(2-(2-chlorophenyl)-2-oxoethyl)-5,6a-dimethyl-5,6a,7,11b-tetrahydro-6H-indeno[2,1-c]quinolin-6-one (3an)**

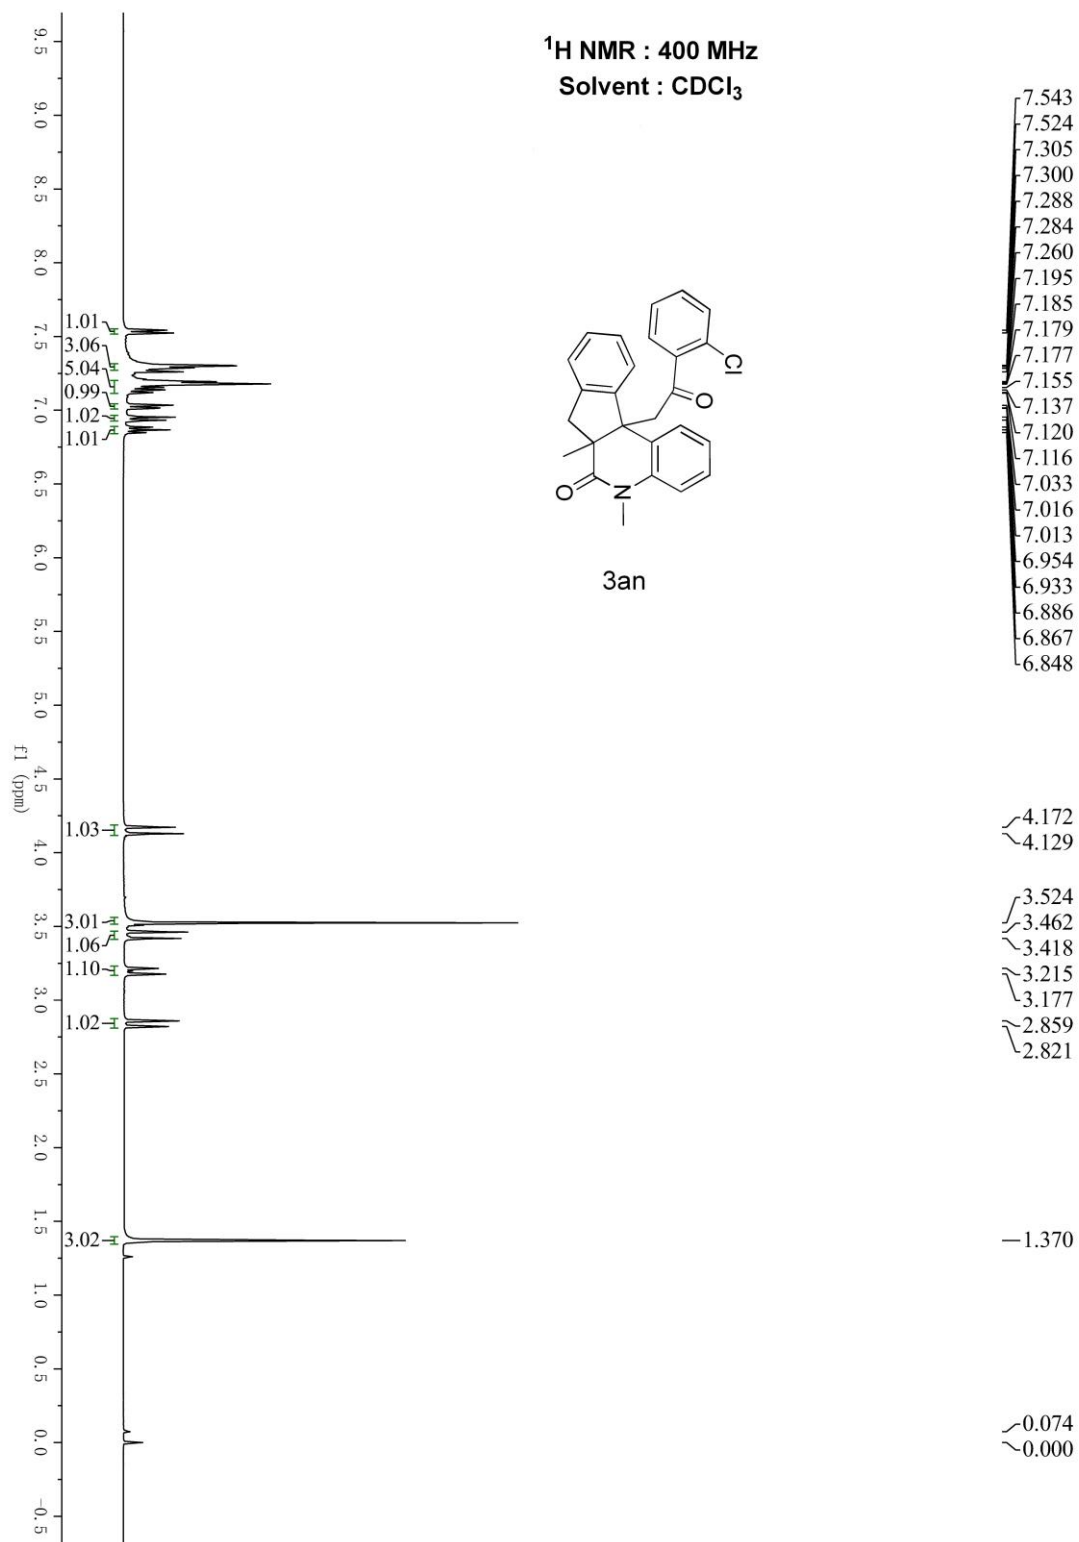

$^{13}\text{C}$   $\{^1\text{H}\}$  NMR : 100 MHz  
Solvent :  $\text{CDCl}_3$

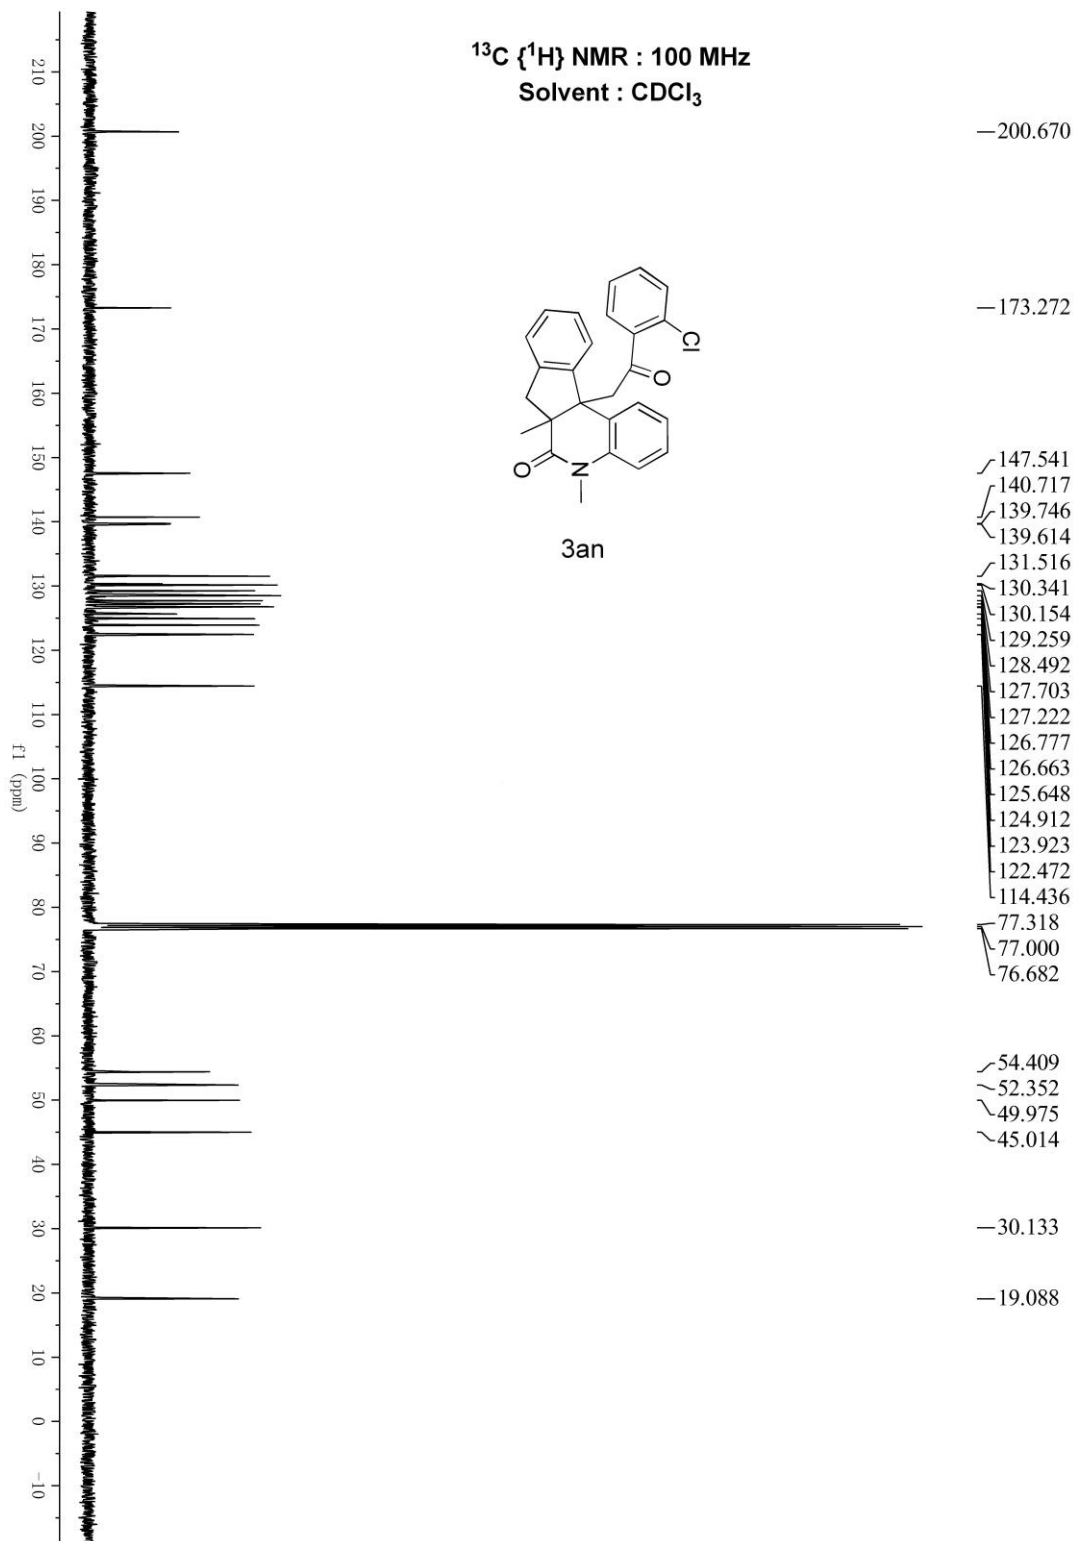



**5,6a-dimethyl-11b-(2-oxo-2-(thiophen-2-yl)ethyl)-5,6a,7,11b-tetrahydro-6H-inden  
o[2,1-c]quinolin-6-one (3ao)**

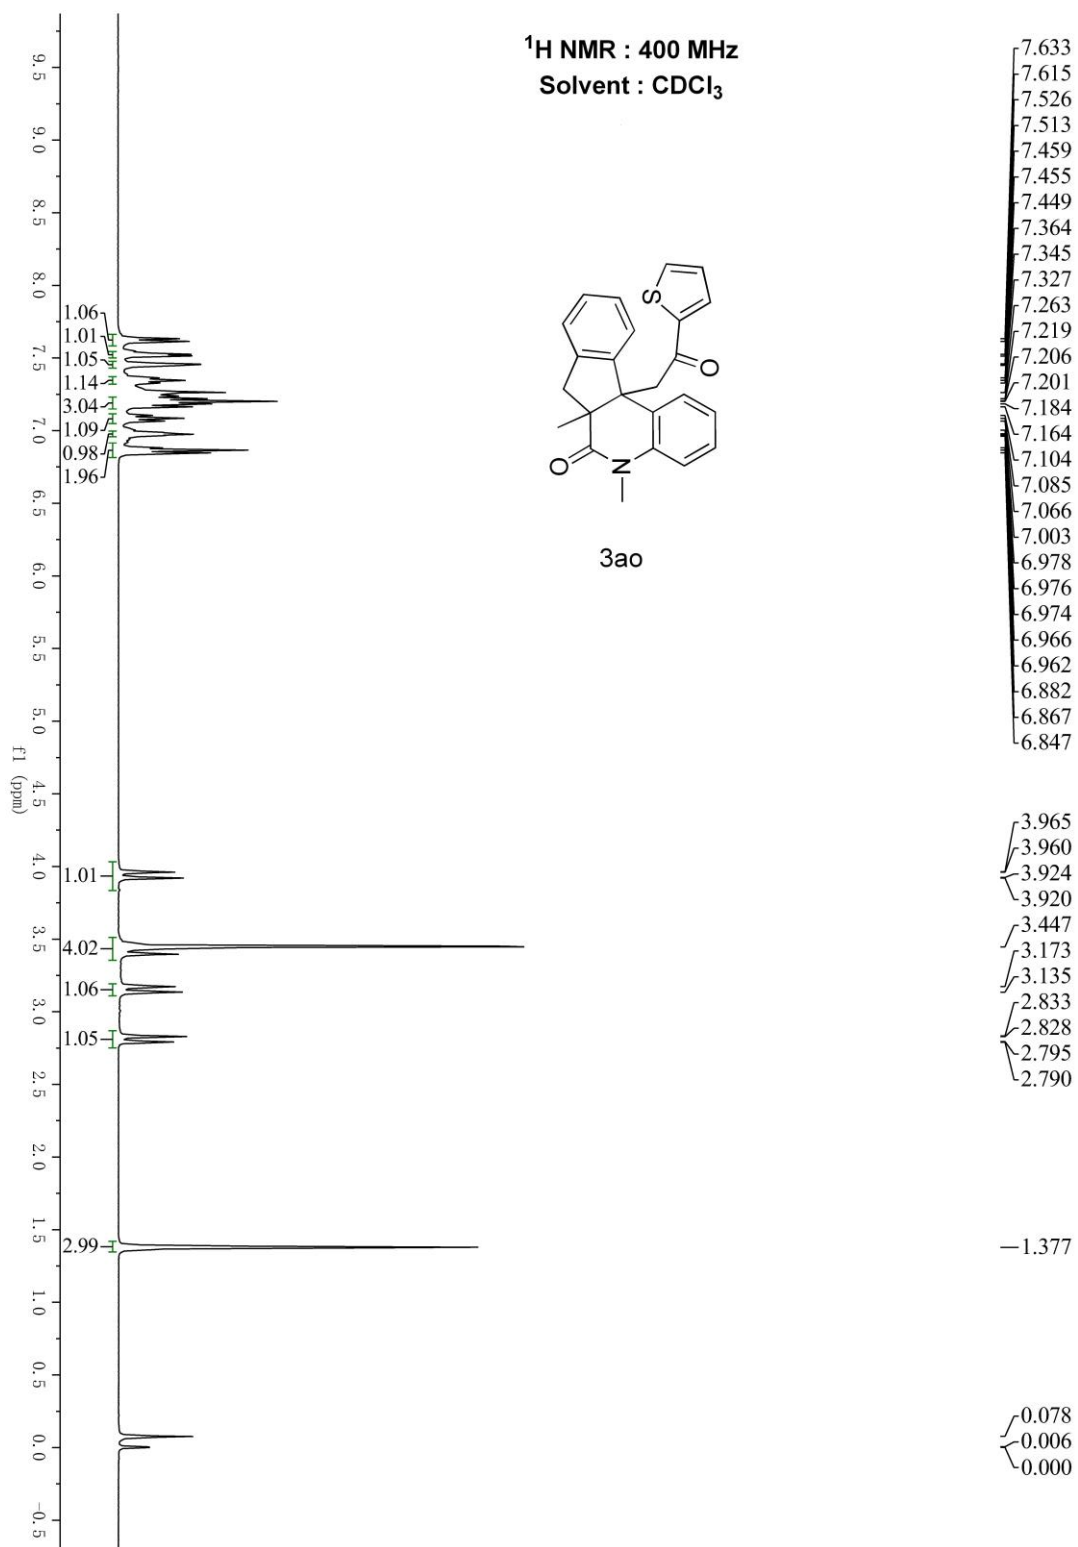

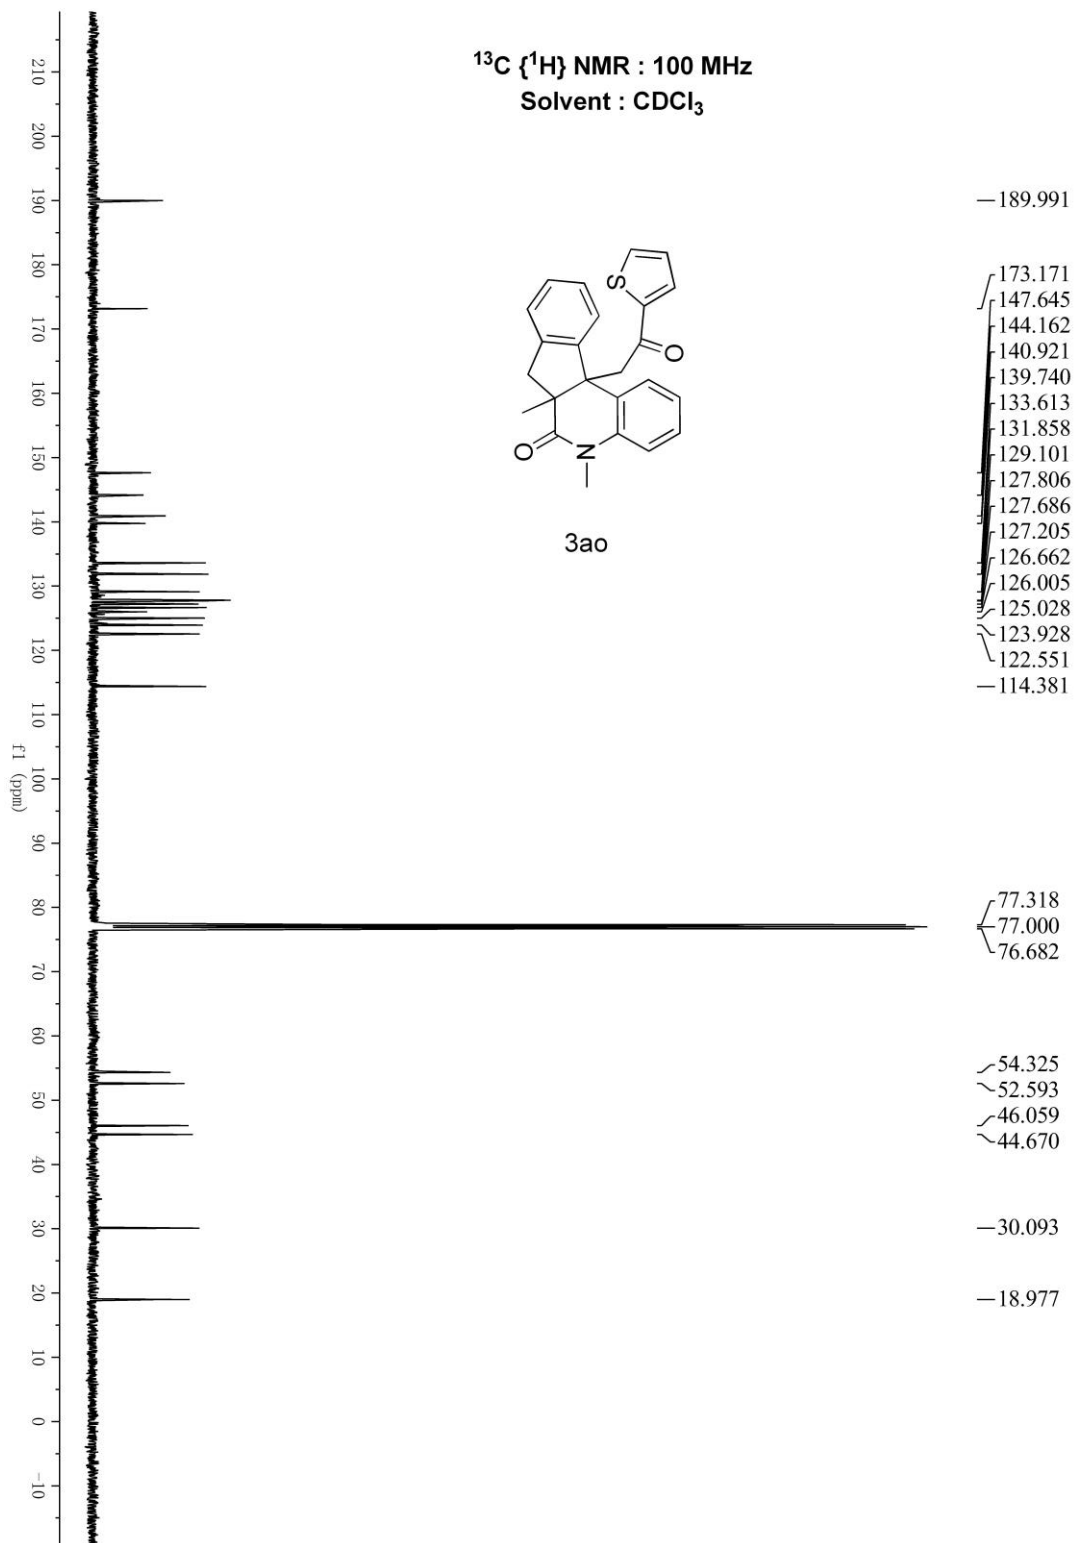

**5,6a-dimethyl-11b-(2-(naphthalen-2-yl)-2-oxoethyl)-5,6a,7,11b-tetrahydro-6H-indeno[2,1-c]quinolin-6-one (3ap)**

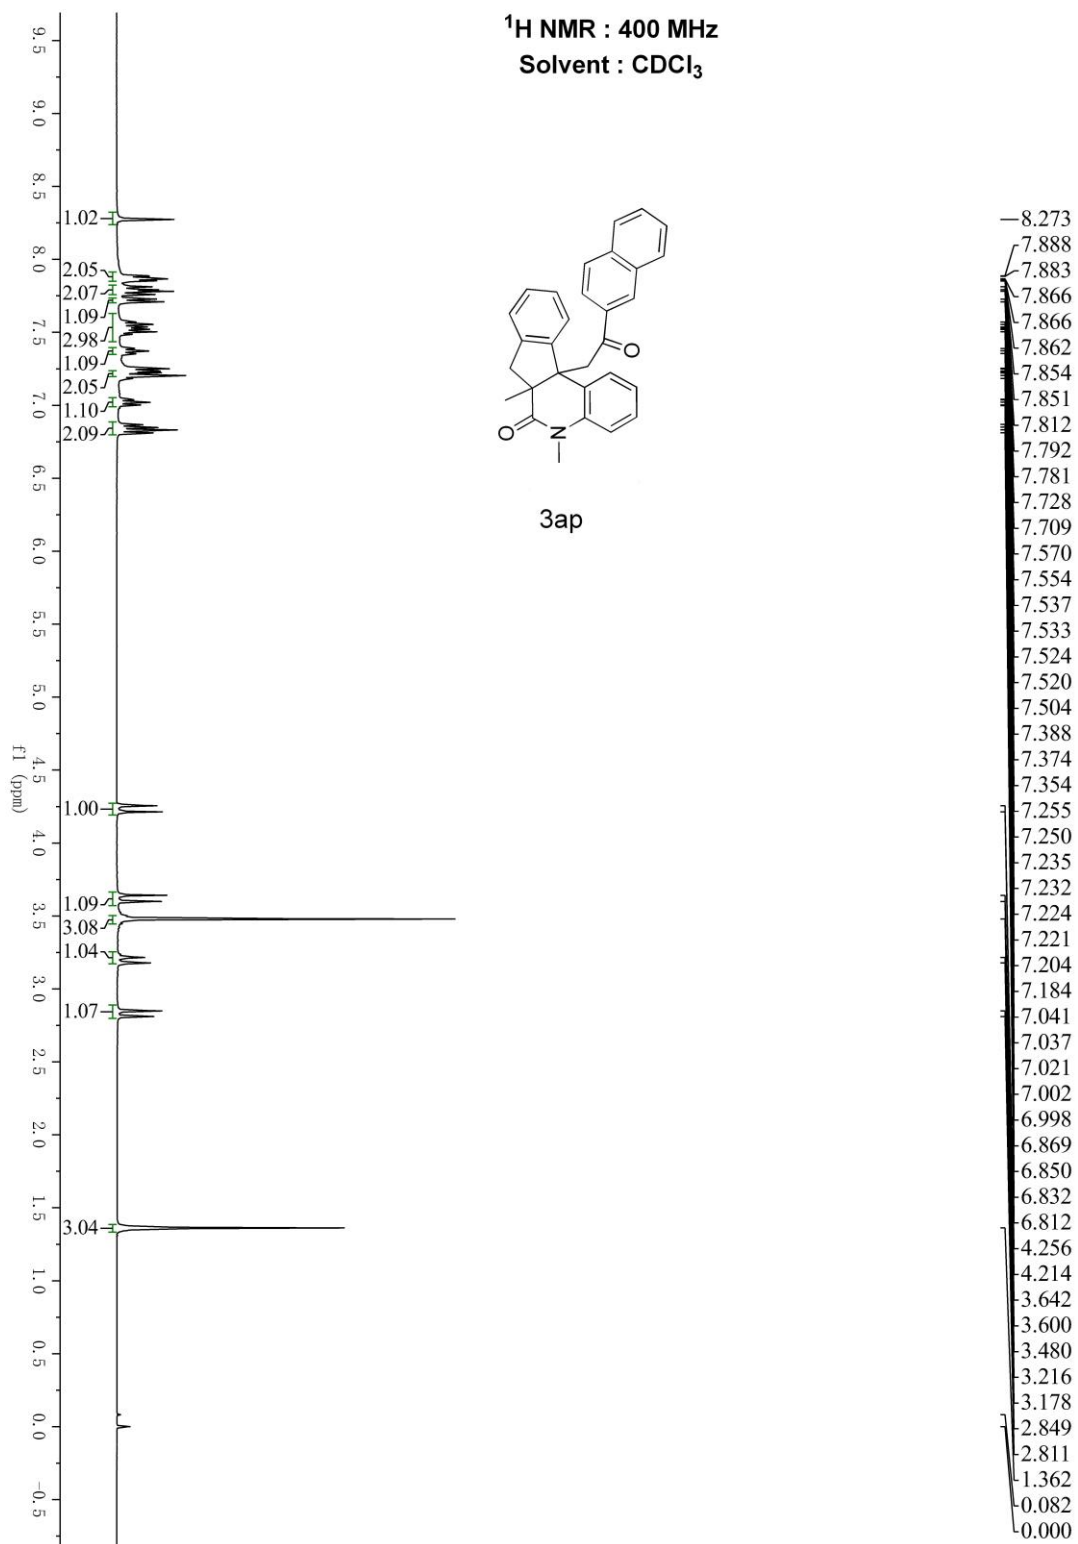

$^{13}\text{C}$   $\{^1\text{H}\}$  NMR : 100 MHz  
Solvent :  $\text{CDCl}_3$

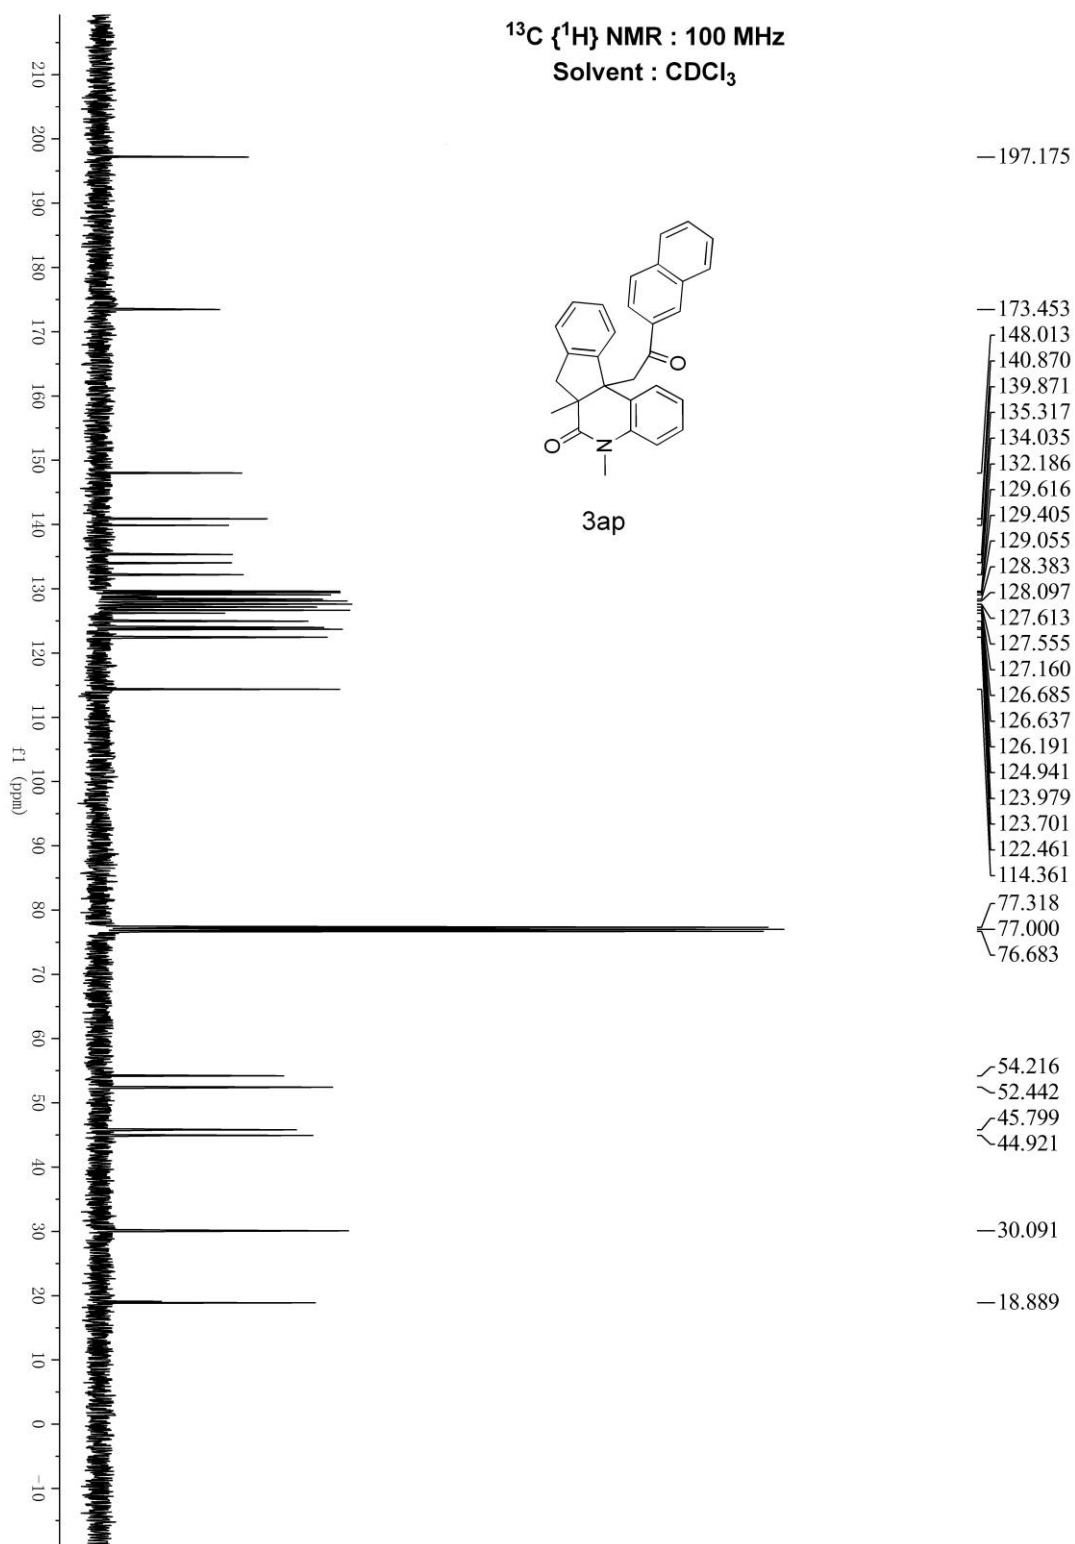

**5,6a-dimethyl-11b-(2-oxobutyl)-5,6a,7,11b-tetrahydro-6H-indeno[2,1-c]quinolin-6-one (3aq)**

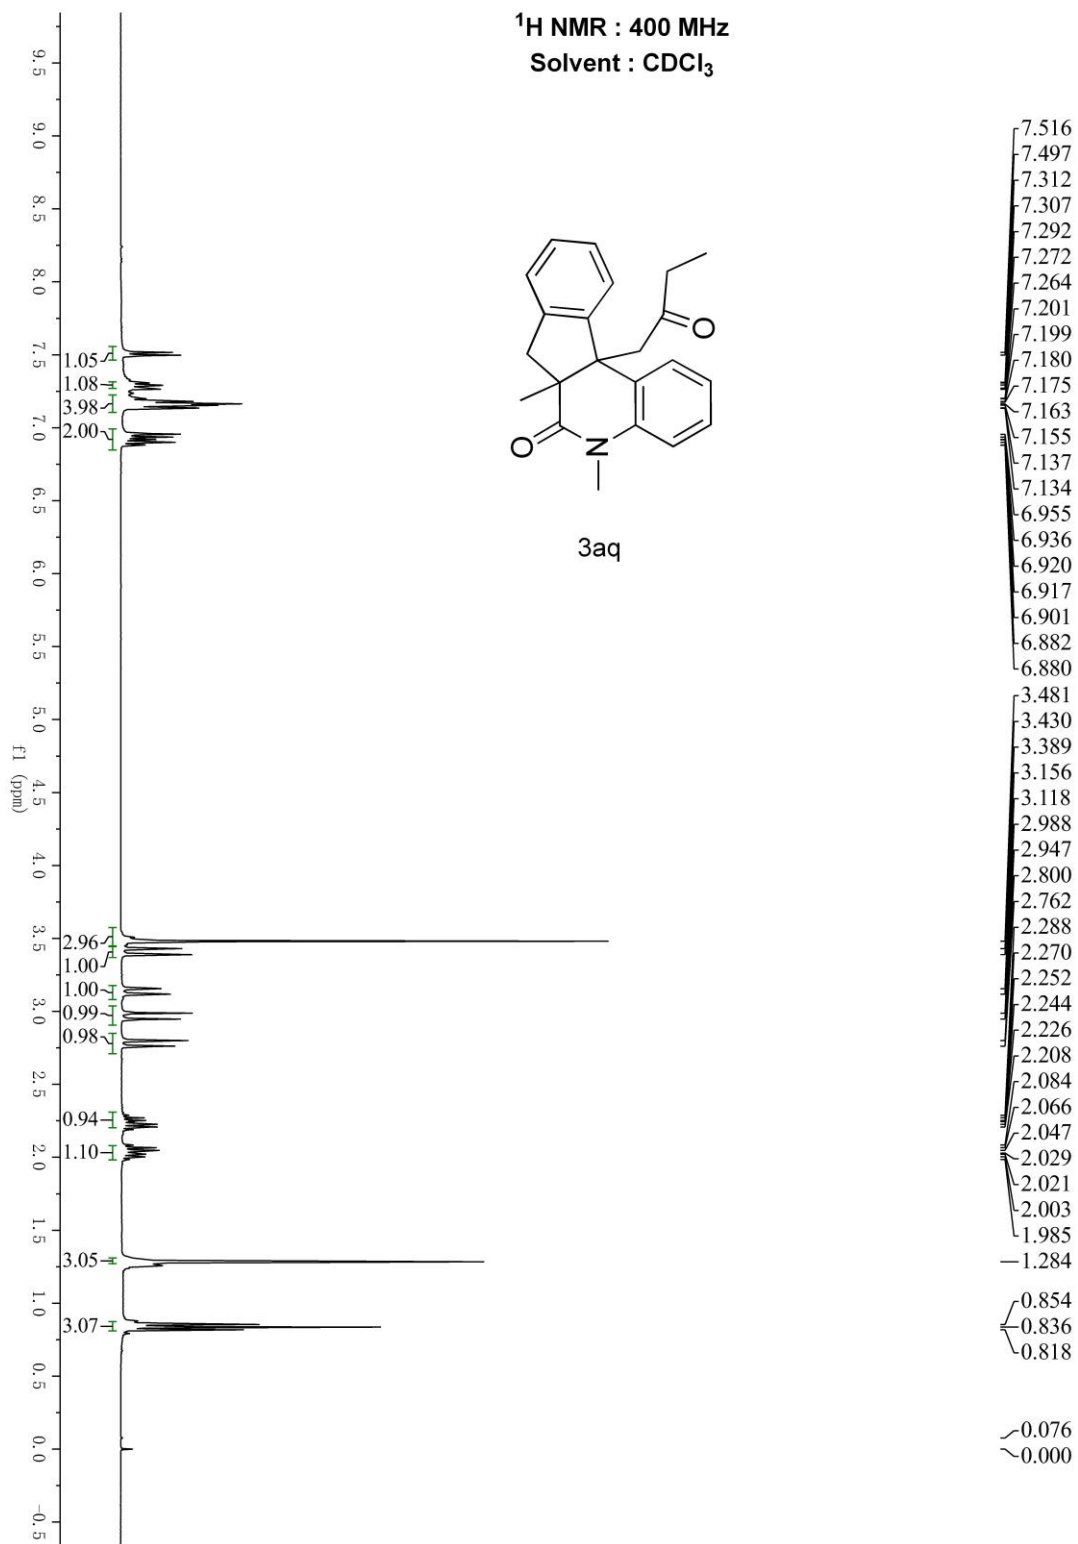

$^{13}\text{C} \{^1\text{H}\}$  NMR : 100 MHz  
Solvent :  $\text{CDCl}_3$

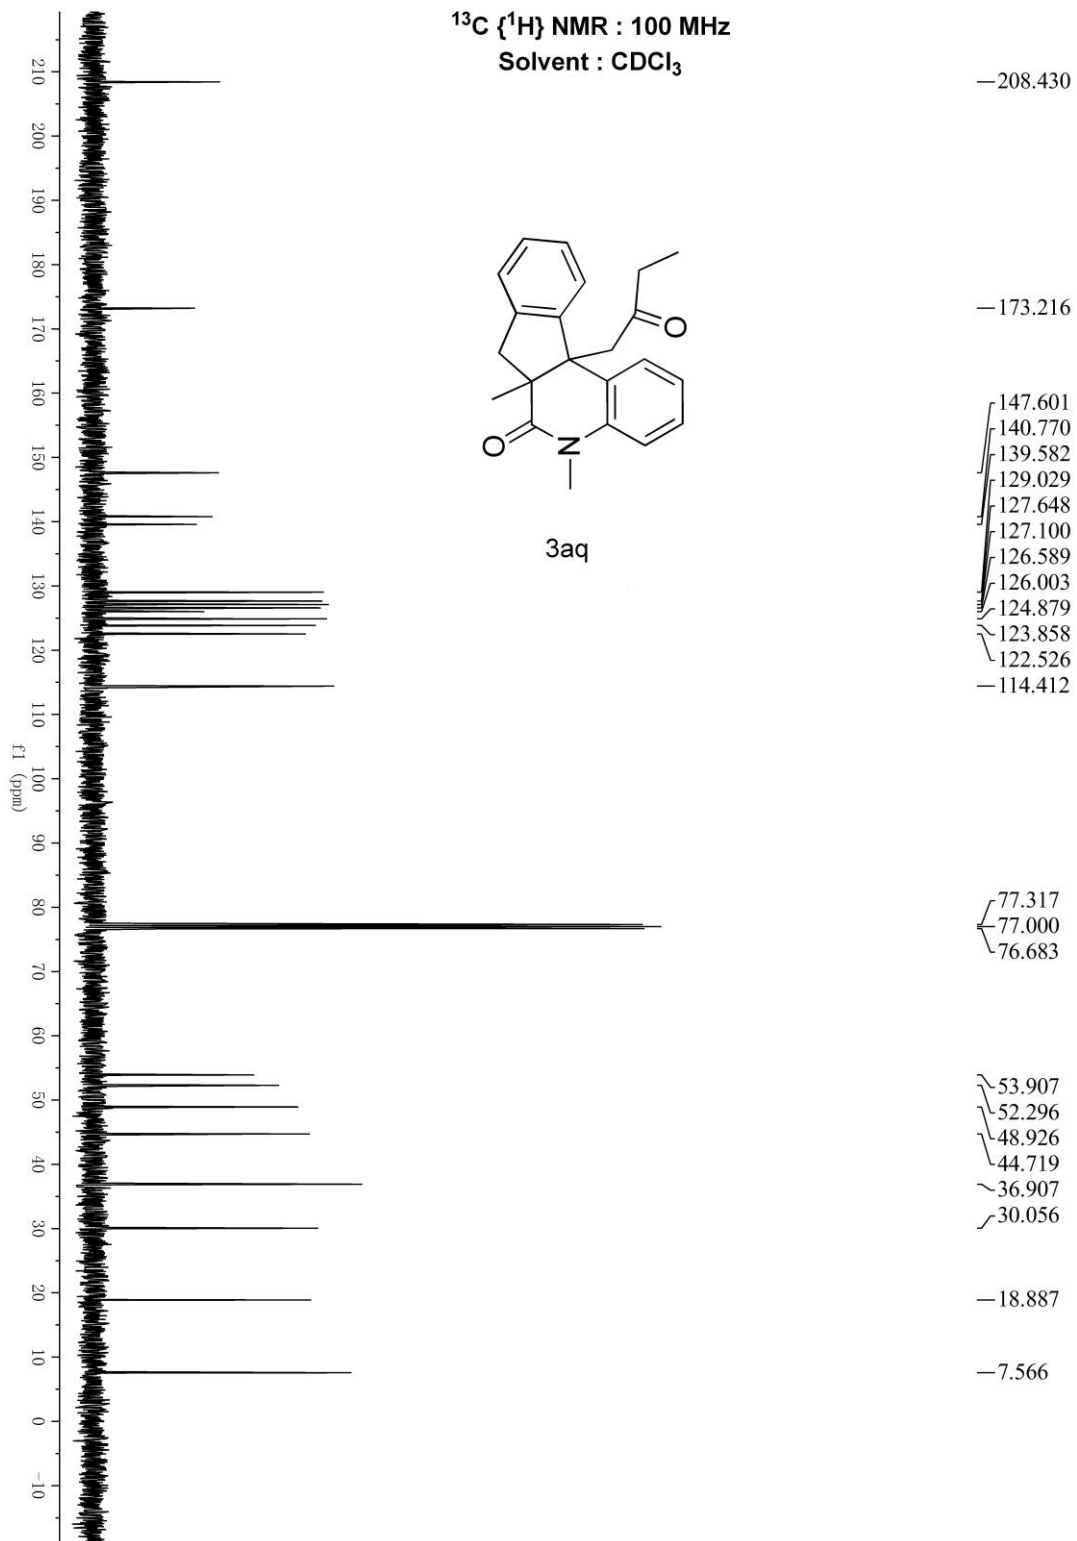

**5,6a-dimethyl-11b-(2-oxopentyl)-5,6a,7,11b-tetrahydro-6H-indeno[2,1-c]quinolin-6-one (3ar)**

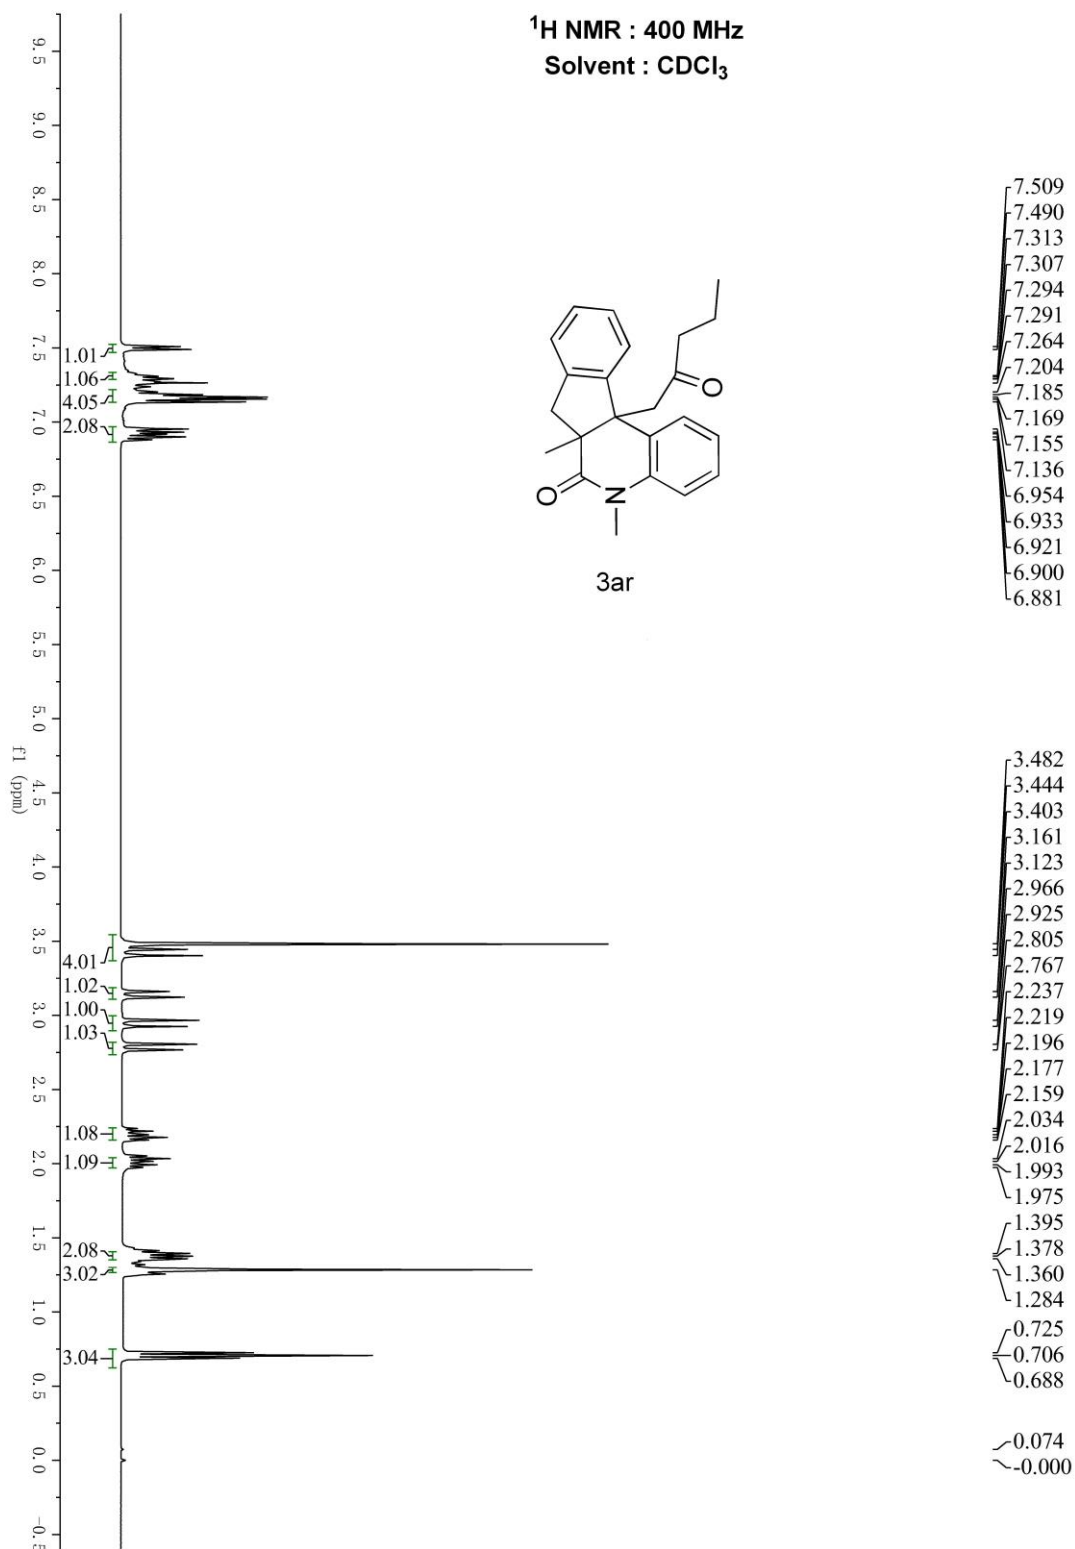

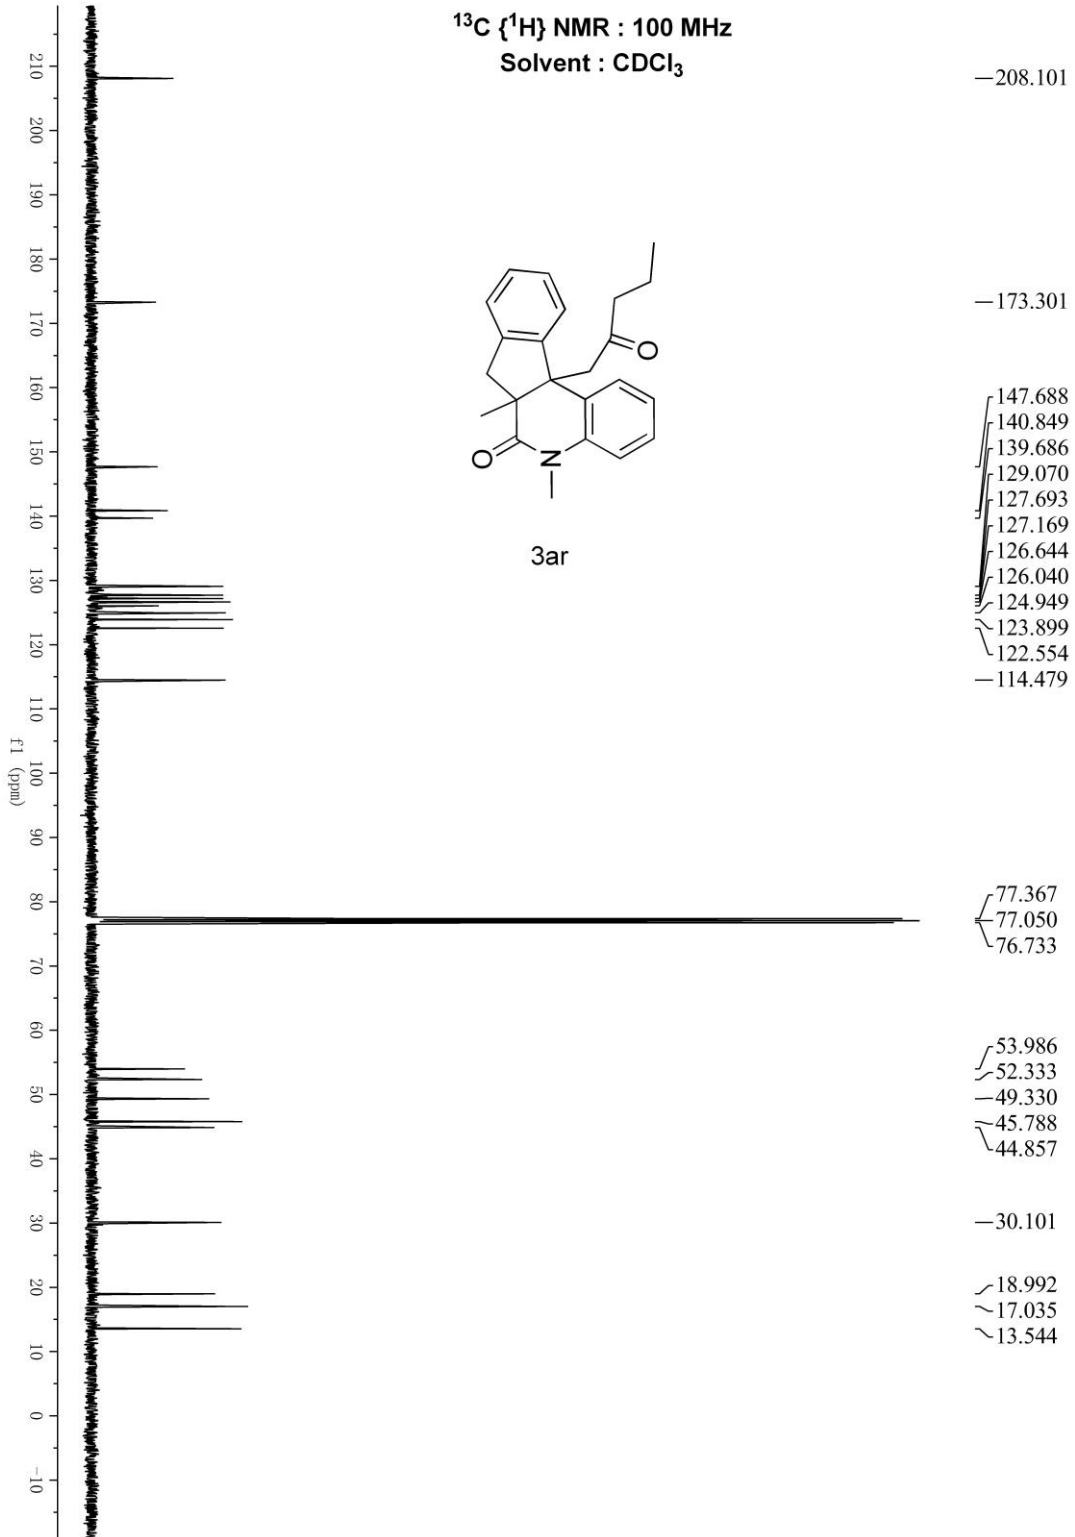



**5,6a-dimethyl-11b-(2-oxo-4-phenylbutyl)-5,6a,7,11b-tetrahydro-6H-indeno[2,1-c]quinolin-6-one (3as)**

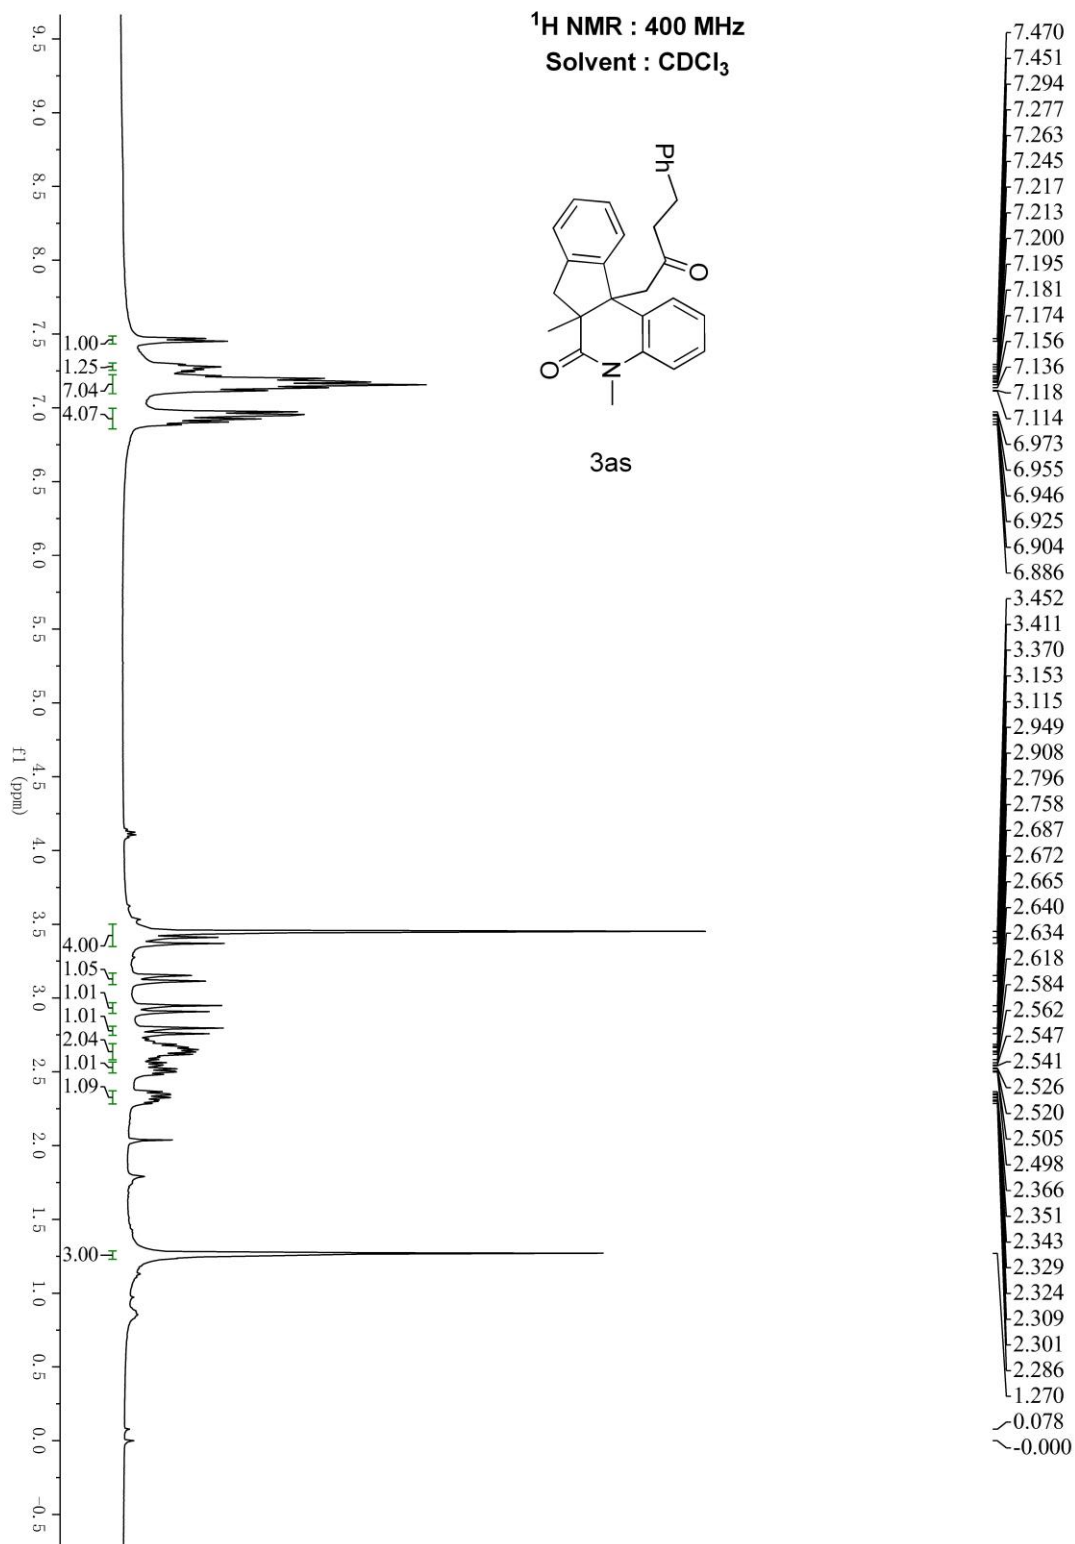

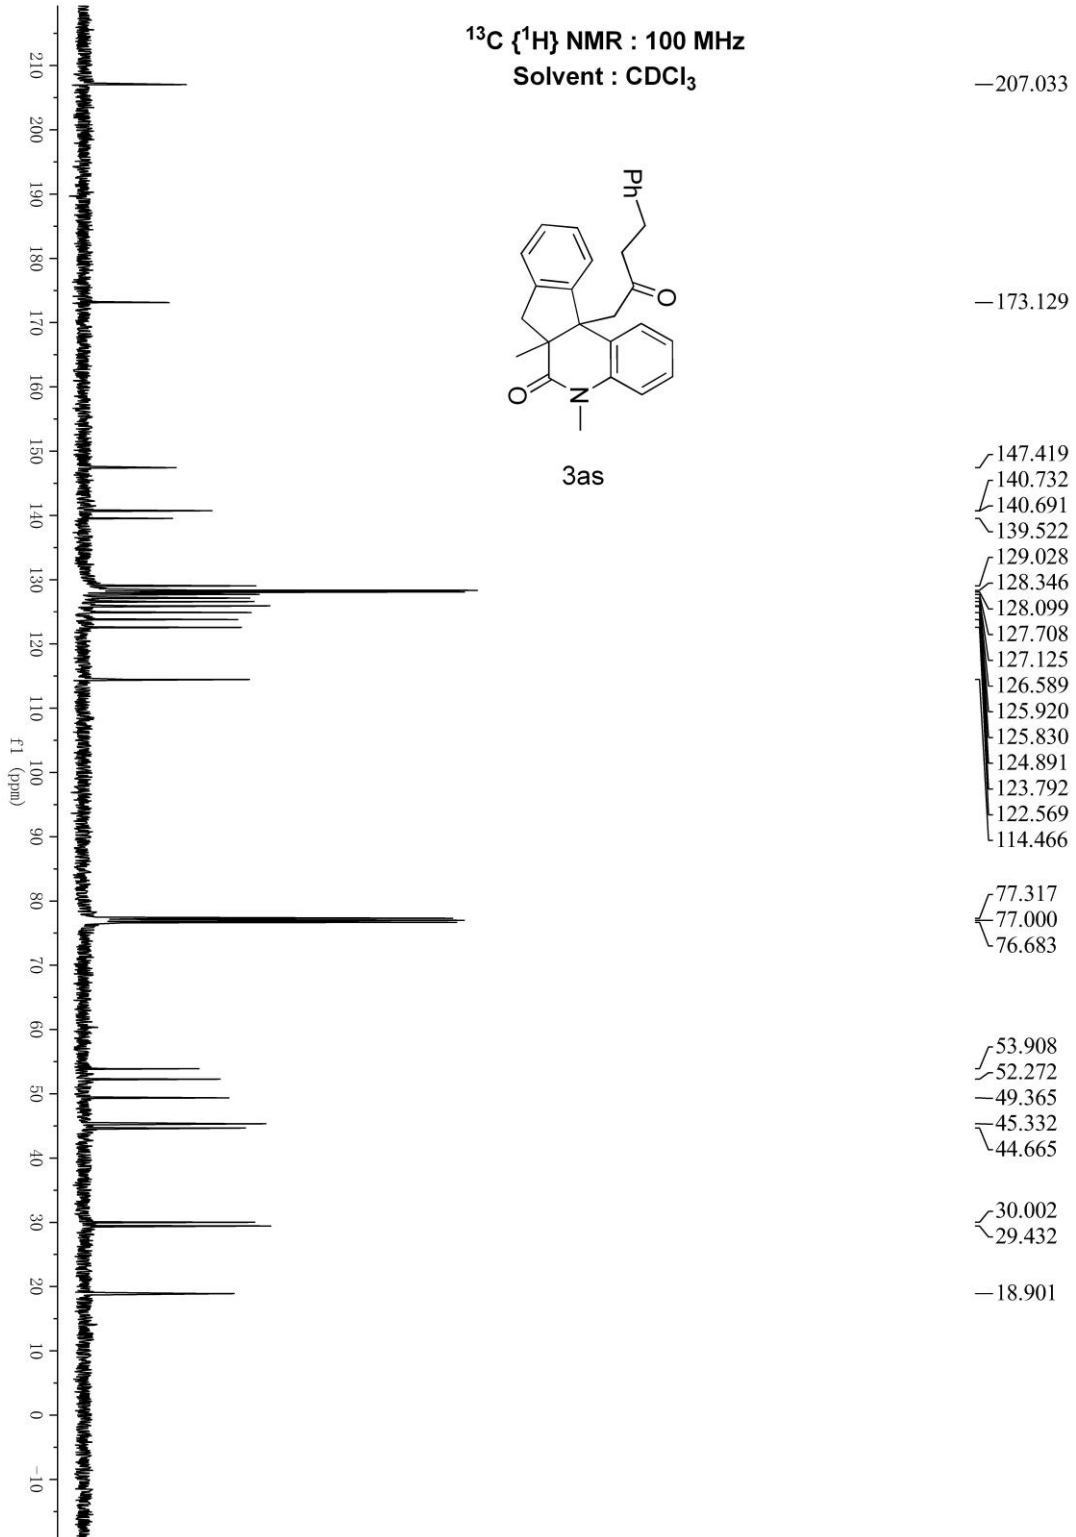

**5,6a-dimethyl-11b-(3-methyl-2-oxobutyl)-5,6a,7,11b-tetrahydro-6H-indeno[2,1-c]  
quinolin-6-one (3au)**

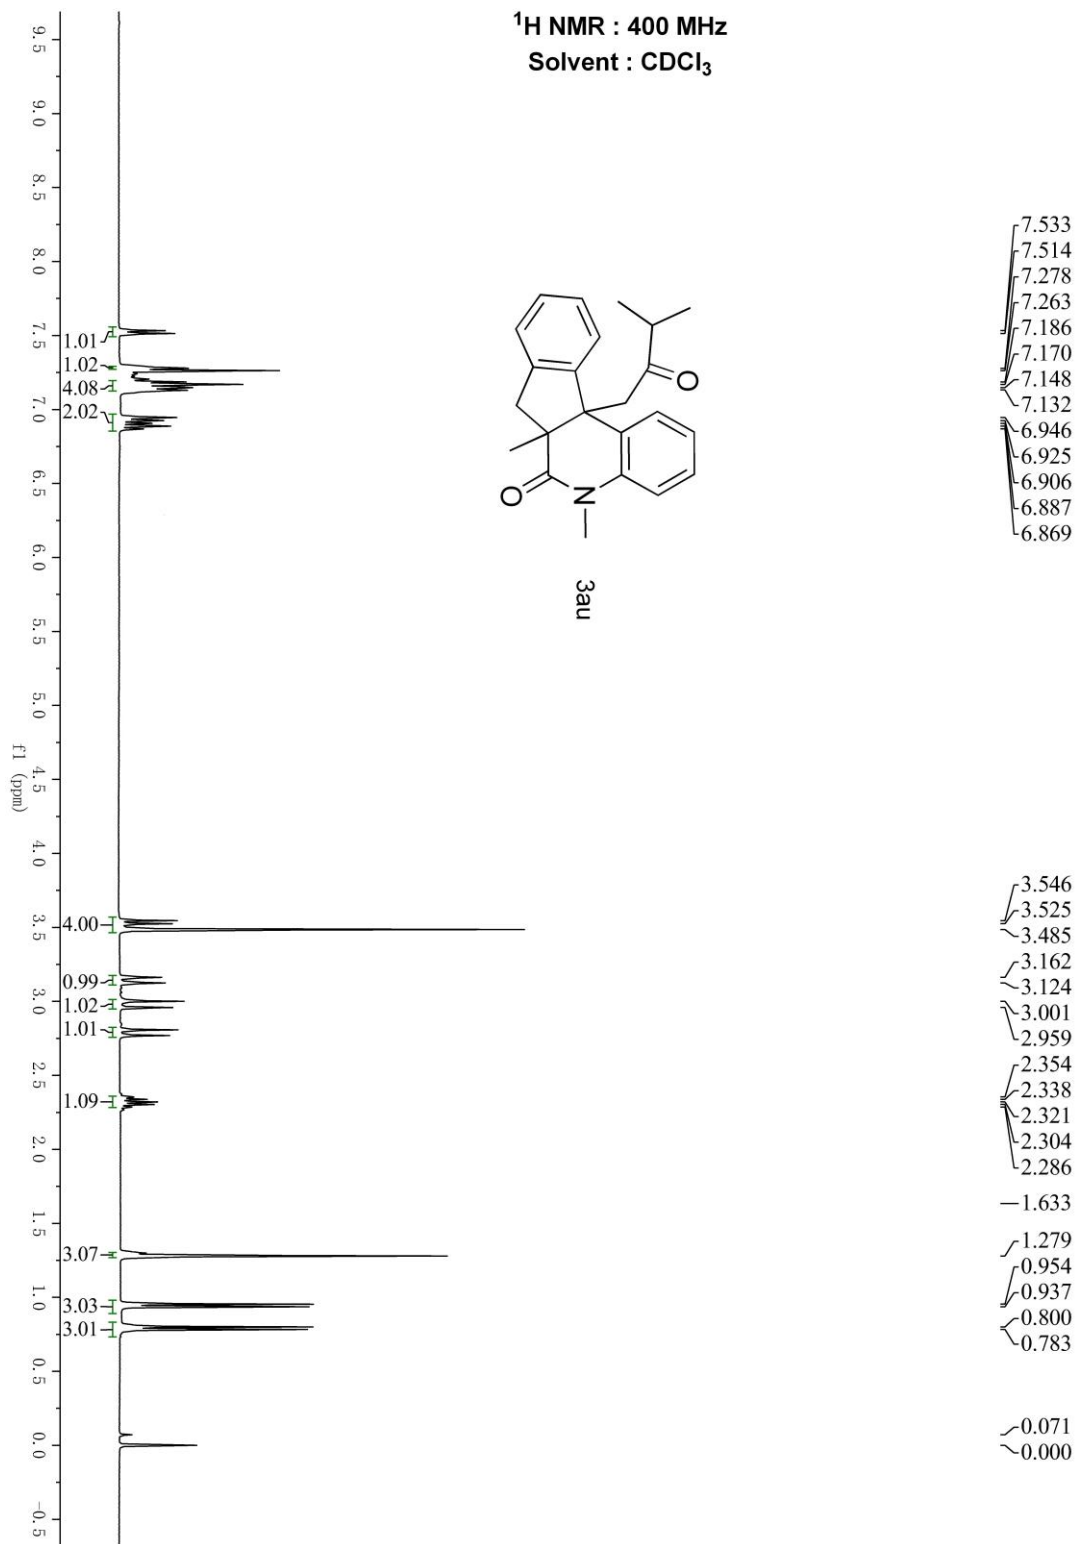

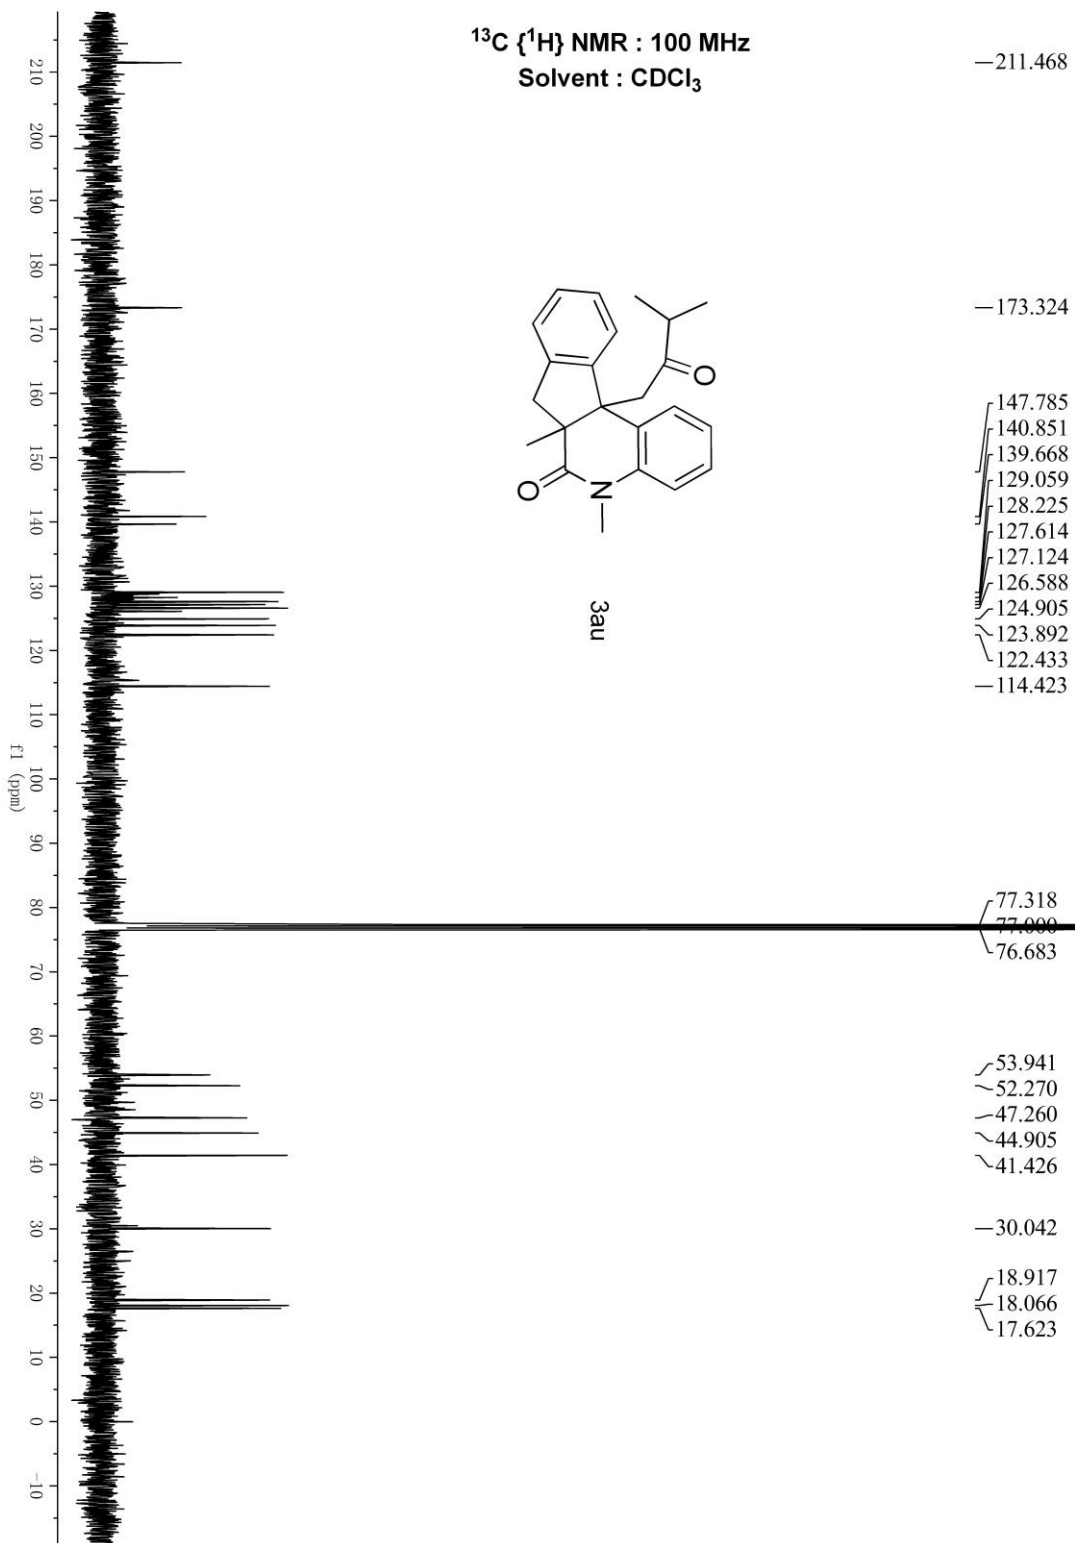

**11b-isobutyl-5,6a-dimethyl-5,6a,7,11b-tetrahydro-6H-indeno[2,1-c]quinolin-6-one (4au)**

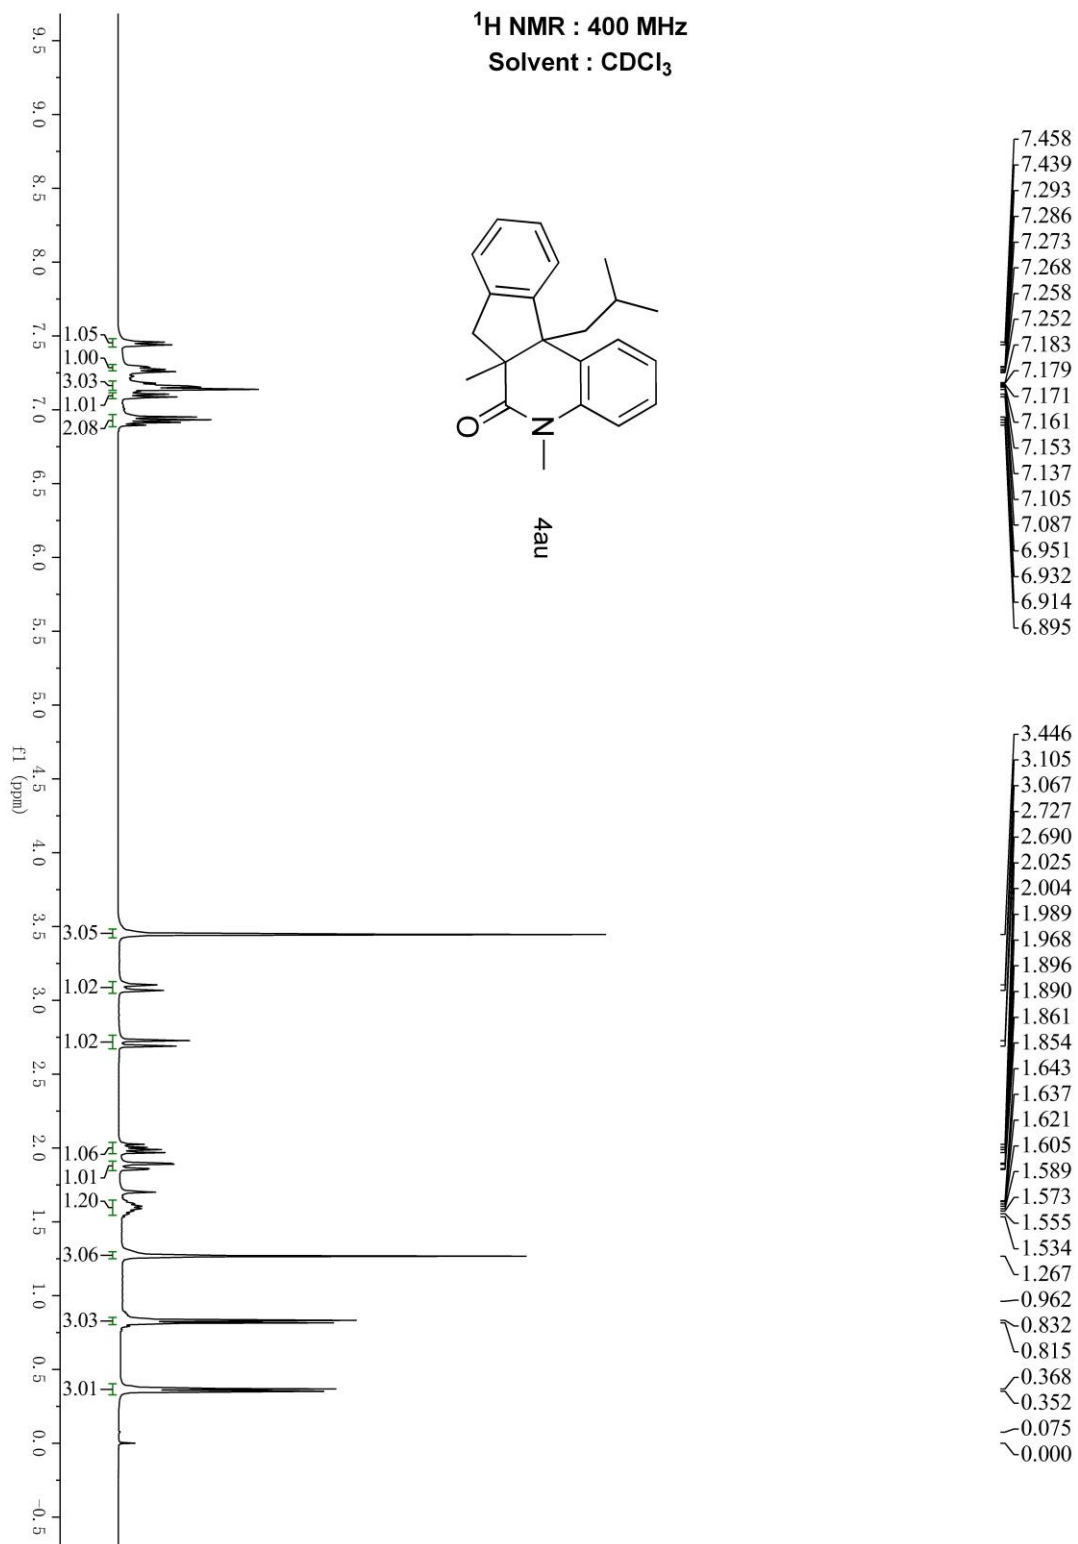

$^{13}\text{C} \{^1\text{H}\}$  NMR : 100 MHz  
Solvent :  $\text{CDCl}_3$

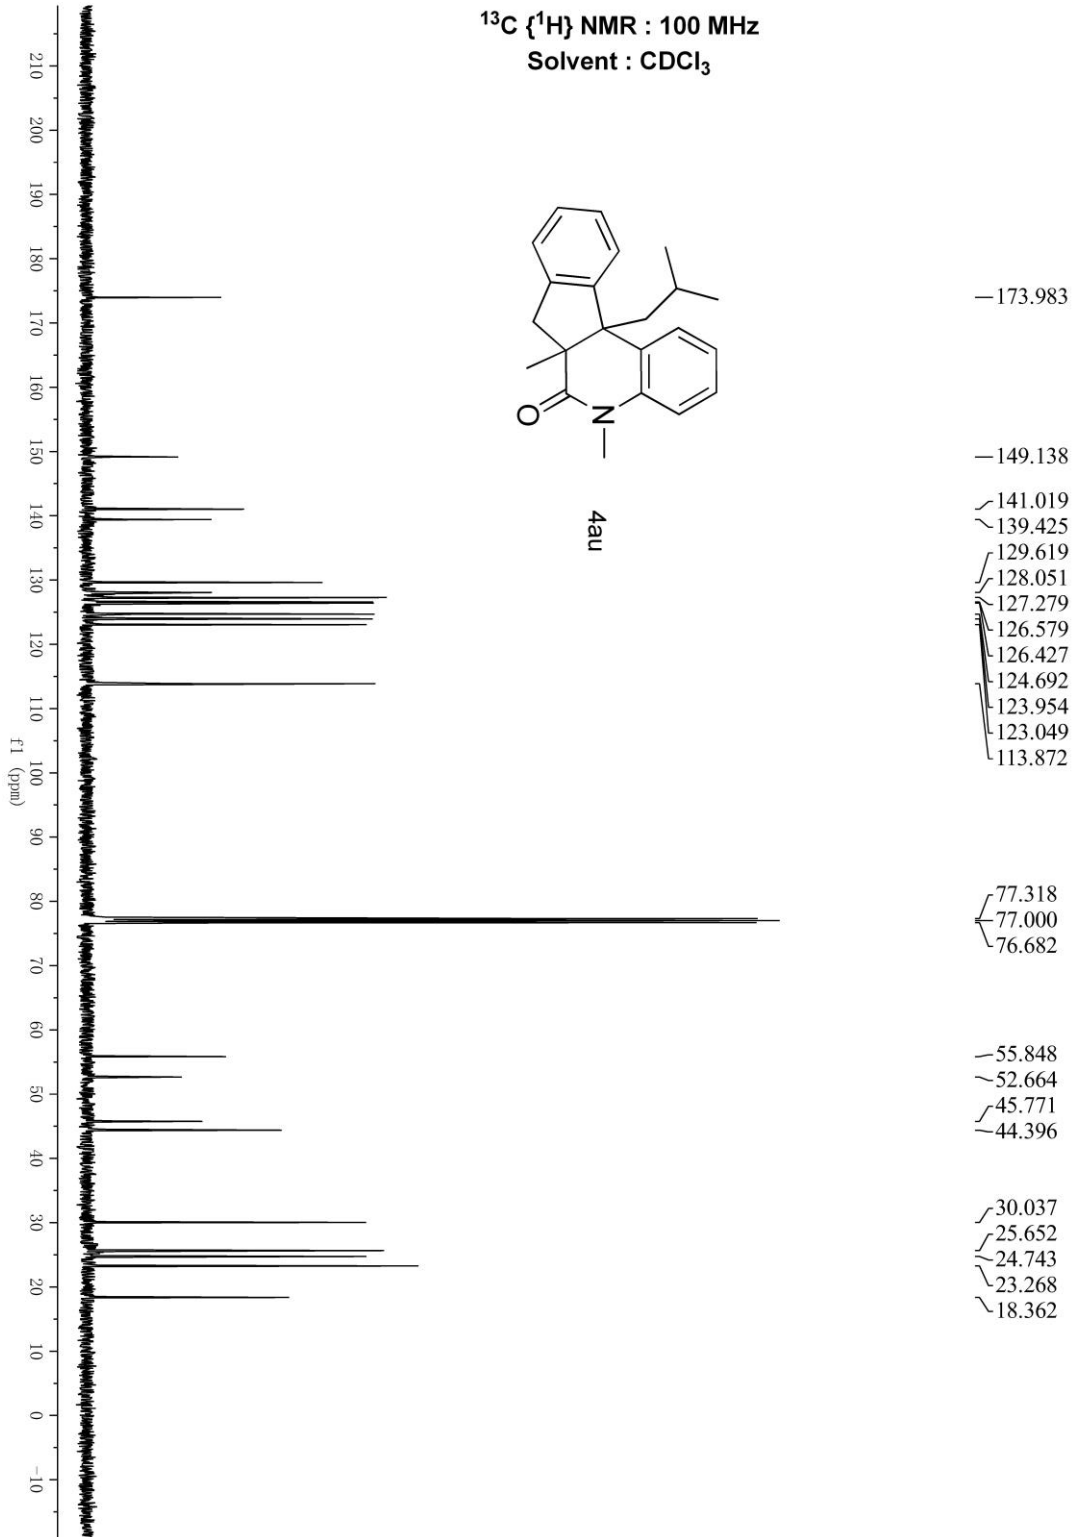

**11b-(cyclopentylmethyl)-5,6a-dimethyl-5,6a,7,11b-tetrahydro-6H-indeno[2,1-c]quinolin-6-one (4av)**

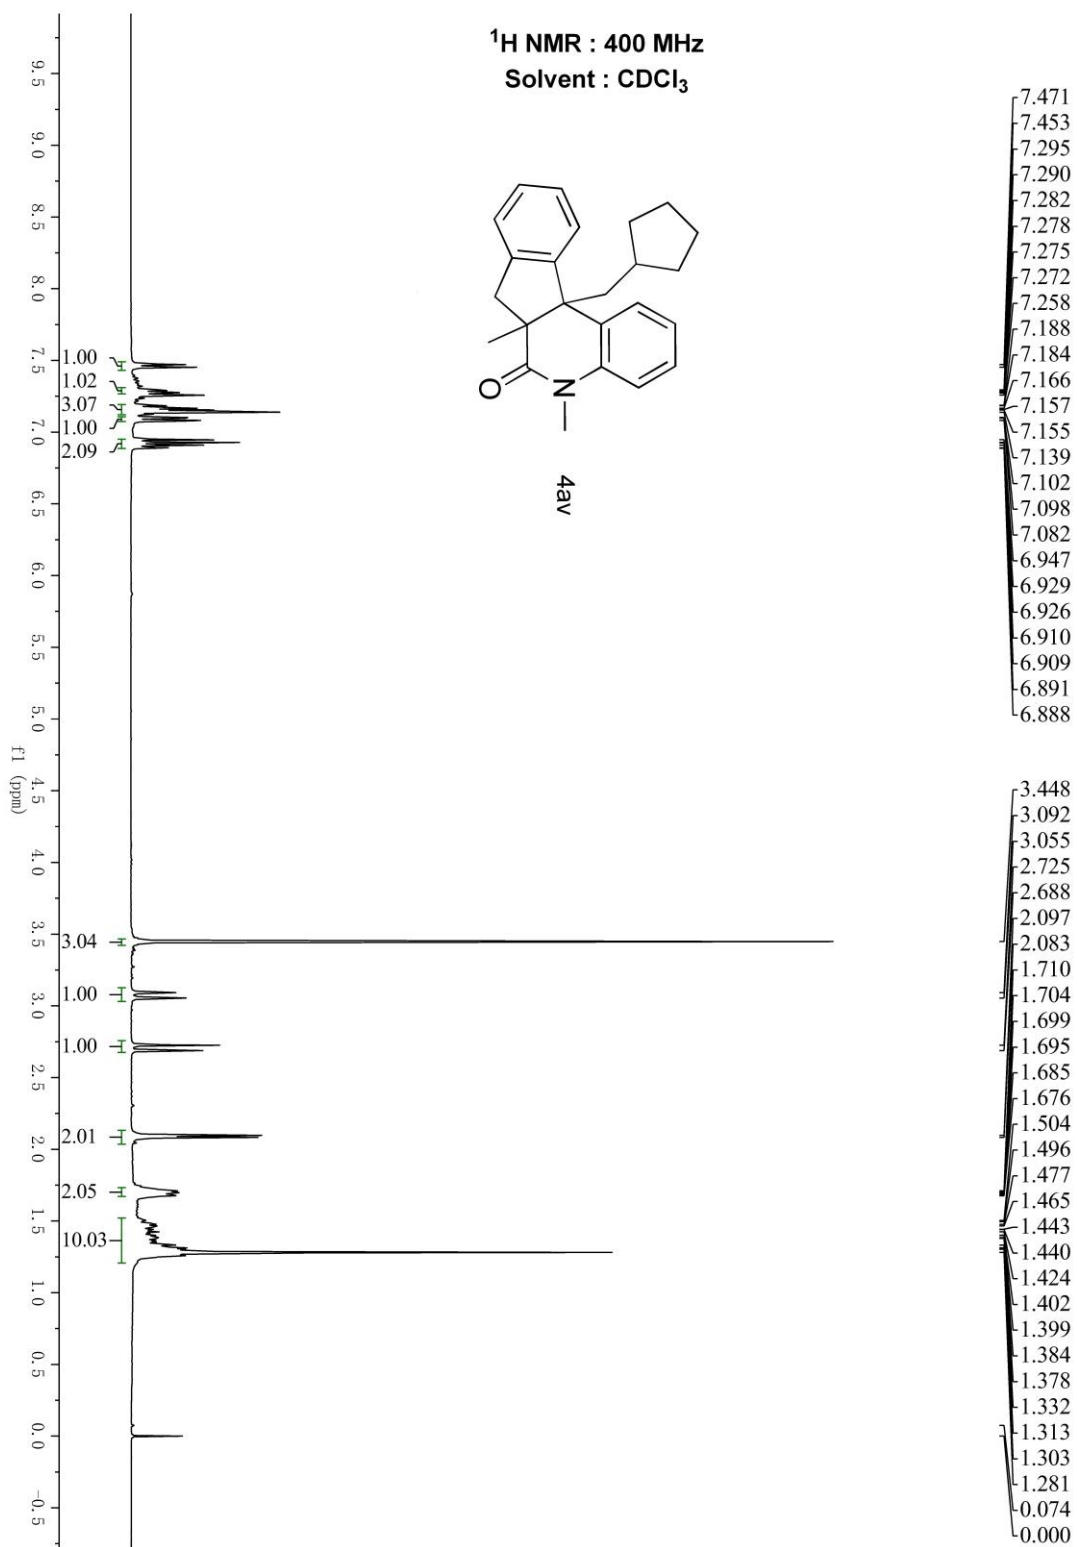

$^{13}\text{C} \{^1\text{H}\}$  NMR : 100 MHz  
Solvent :  $\text{CDCl}_3$

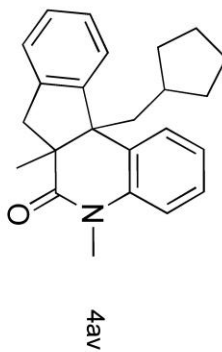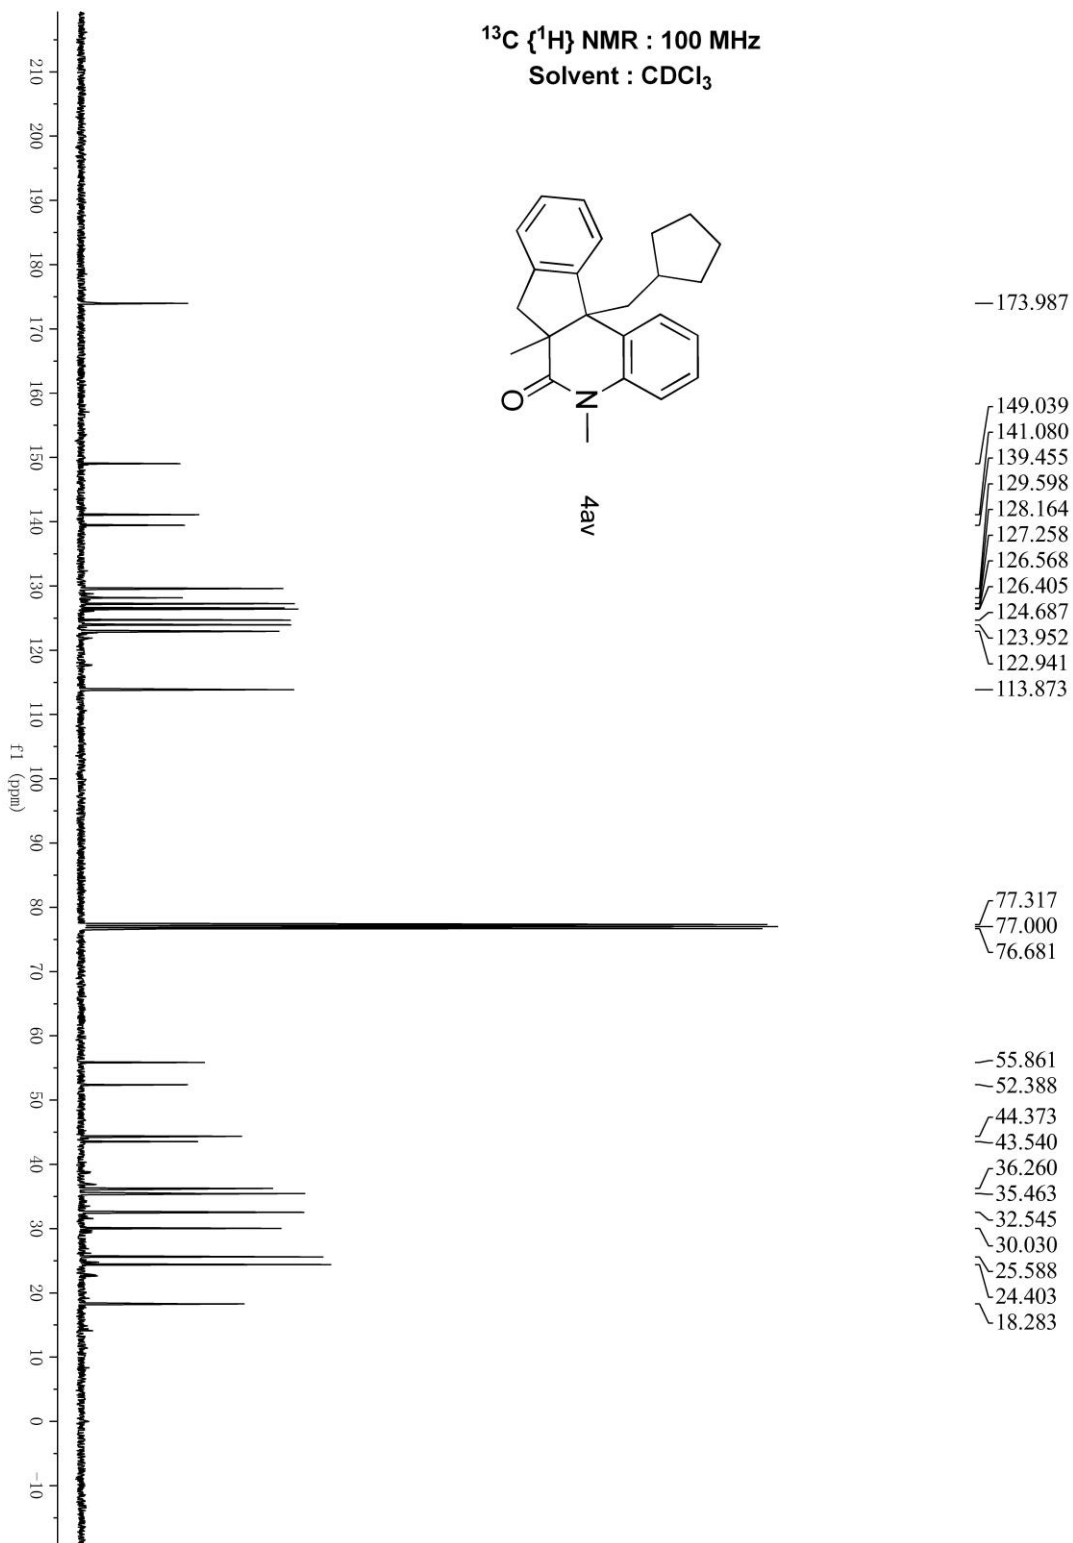



**11b-(cyclohexylmethyl)-5,6a-dimethyl-5,6a,7,11b-tetrahydro-6H-indeno[2,1-c]quinolin-6-one (4aw)**

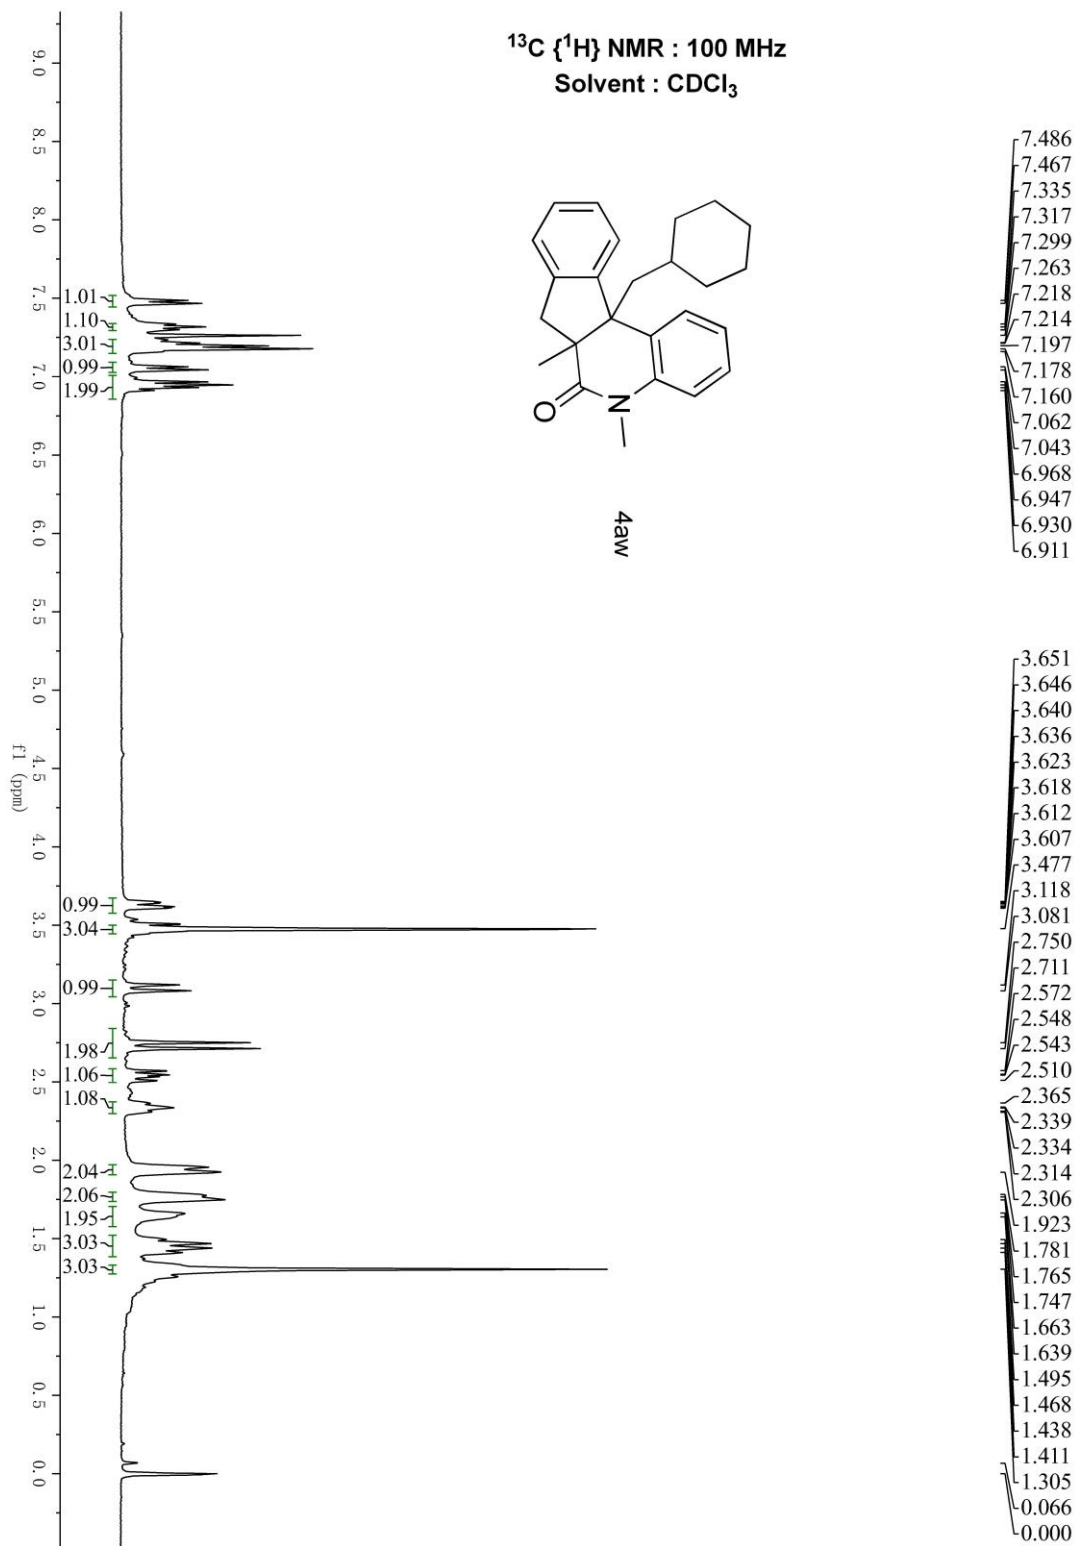

$^{13}\text{C} \{^1\text{H}\}$  NMR : 100 MHz  
Solvent :  $\text{CDCl}_3$

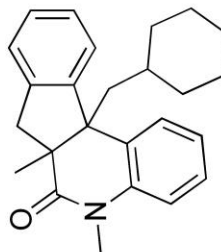

4aw

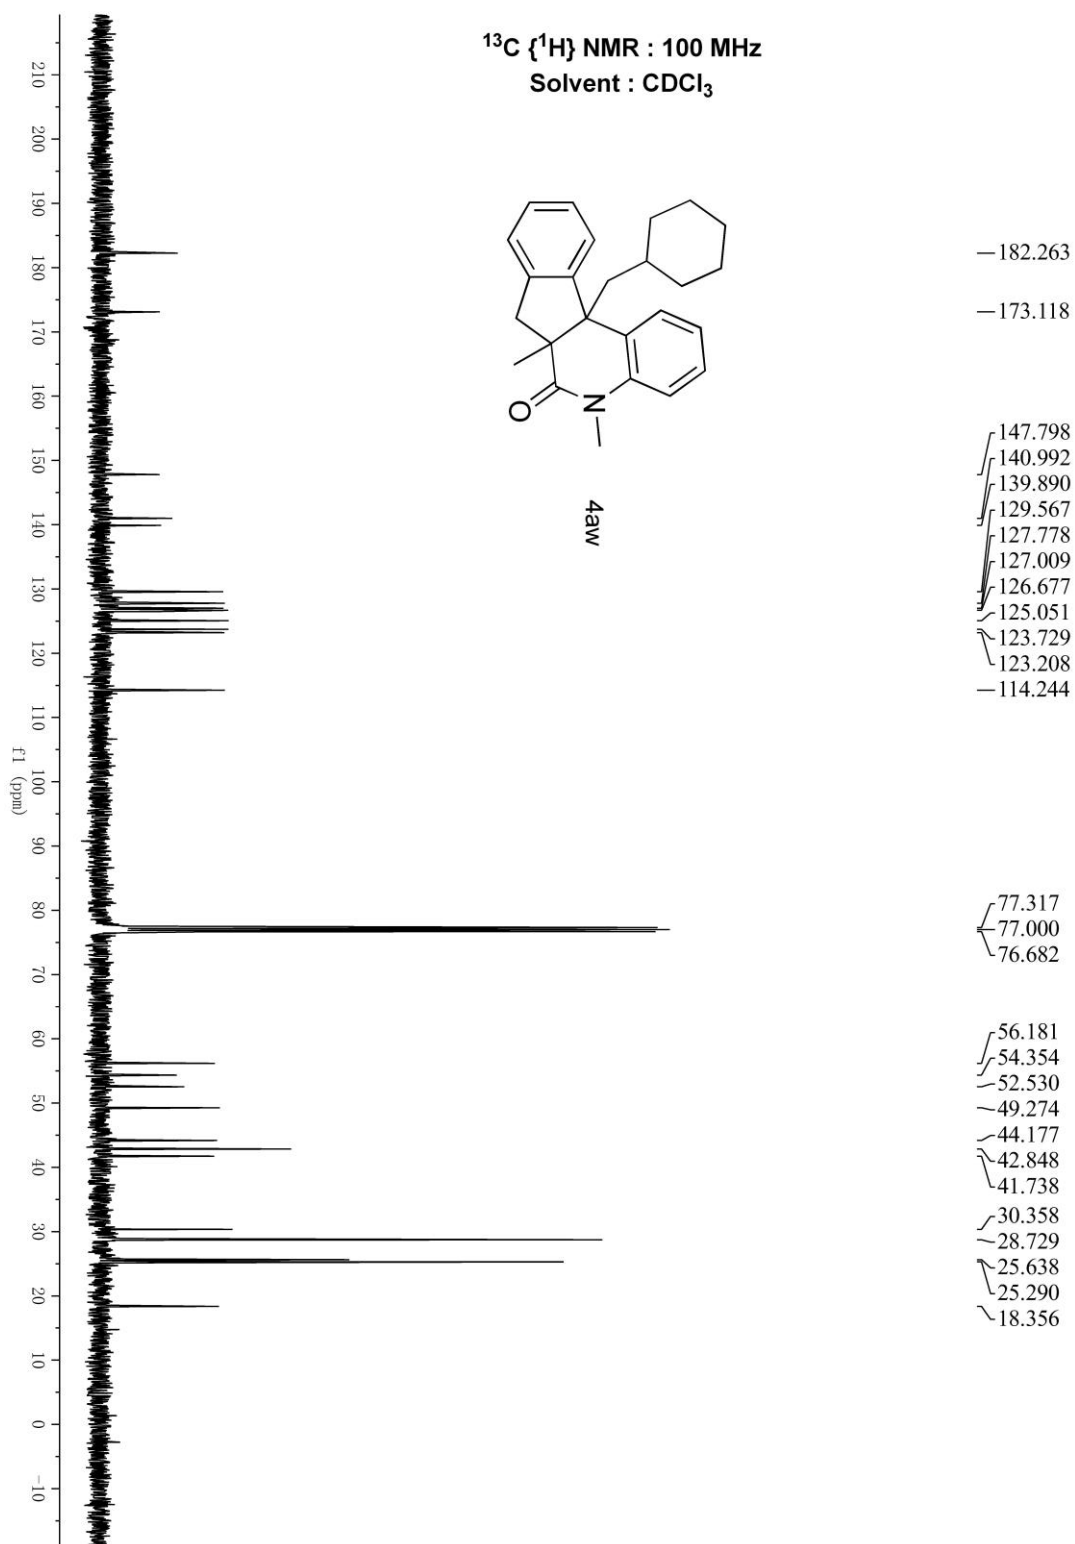

**5,6a-dimethyl-11b-neopentyl-5,6a,7,11b-tetrahydro-6H-indeno[2,1-c]quinolin-6-one (4ax)**

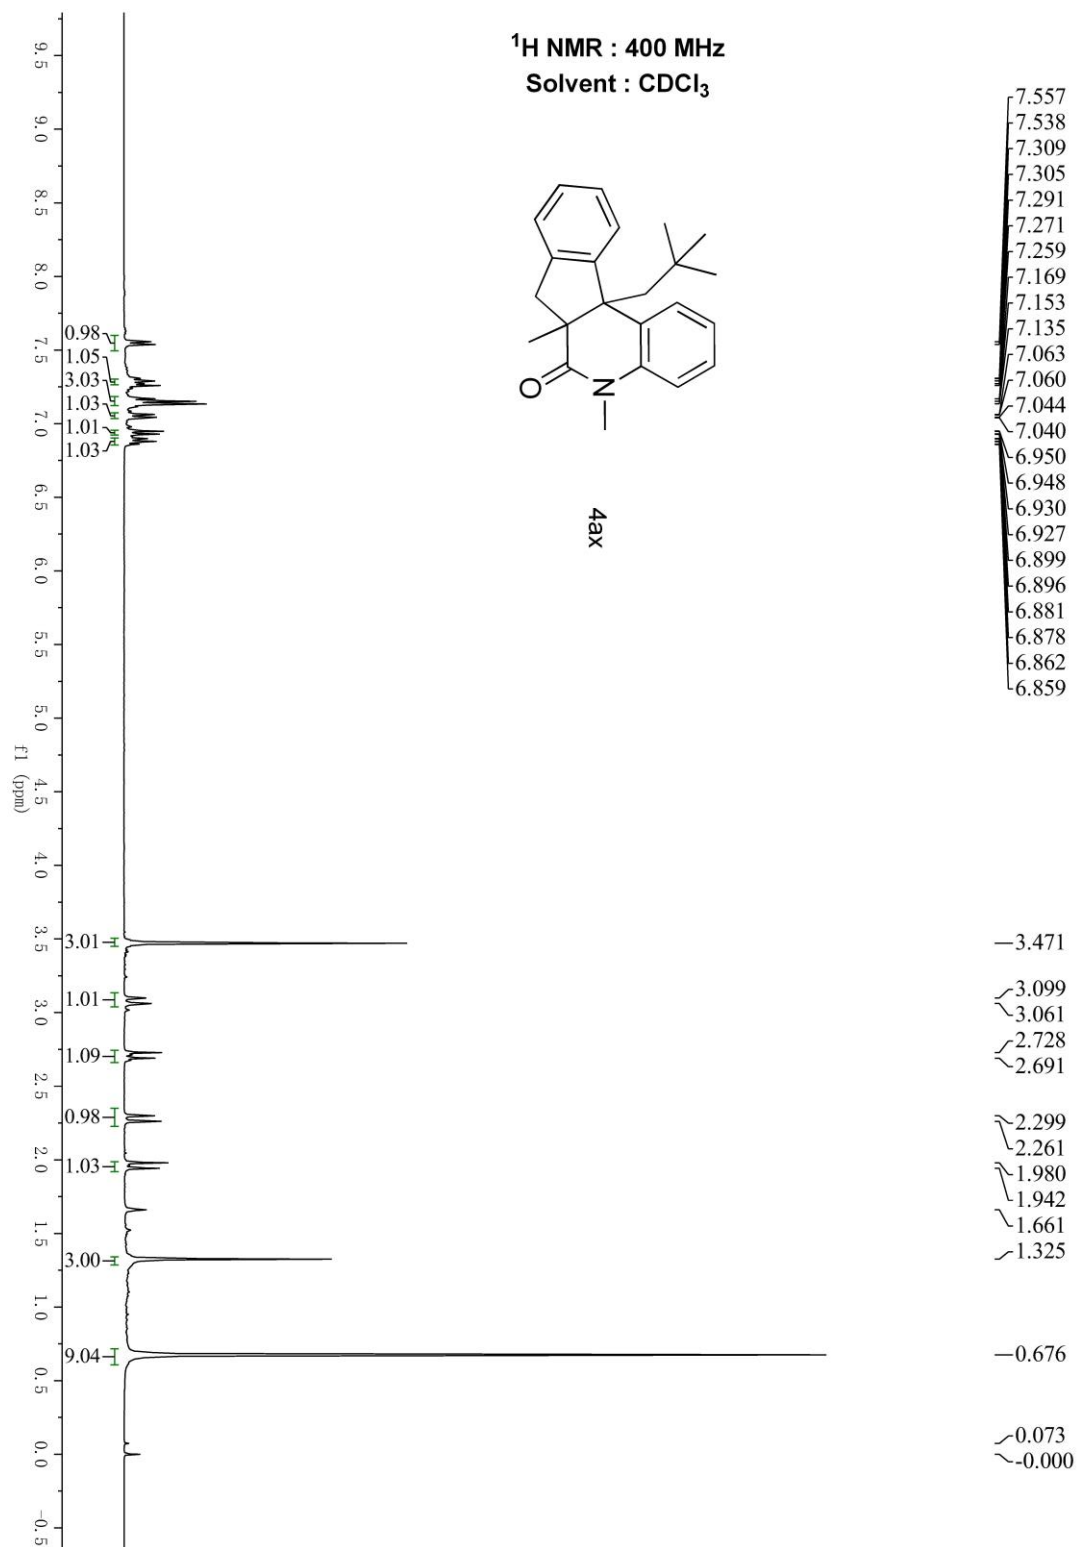

$^{13}\text{C} \{^1\text{H}\}$  NMR : 100 MHz  
Solvent :  $\text{CDCl}_3$

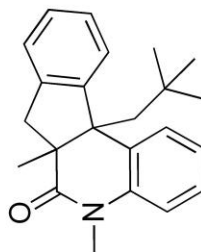

4ax

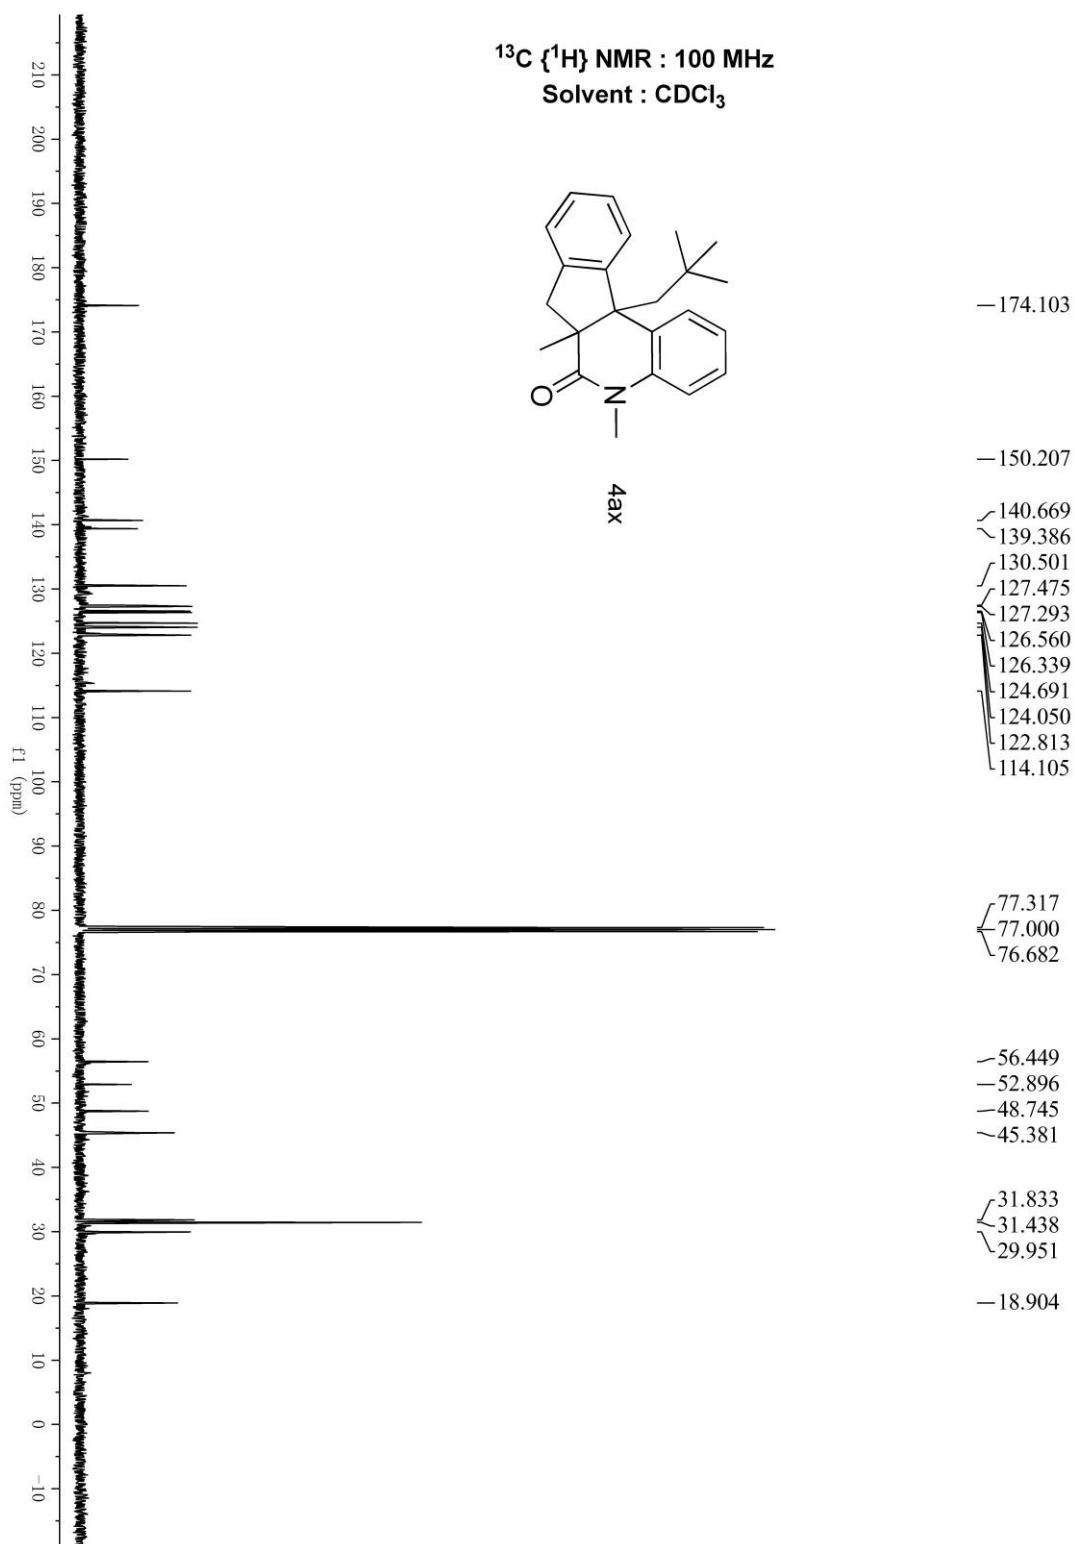

**5,6a-dimethyl-11b-phenethyl-5,6a,7,11b-tetrahydro-6H-indeno[2,1-c]quinolin-6-one (4ay)**

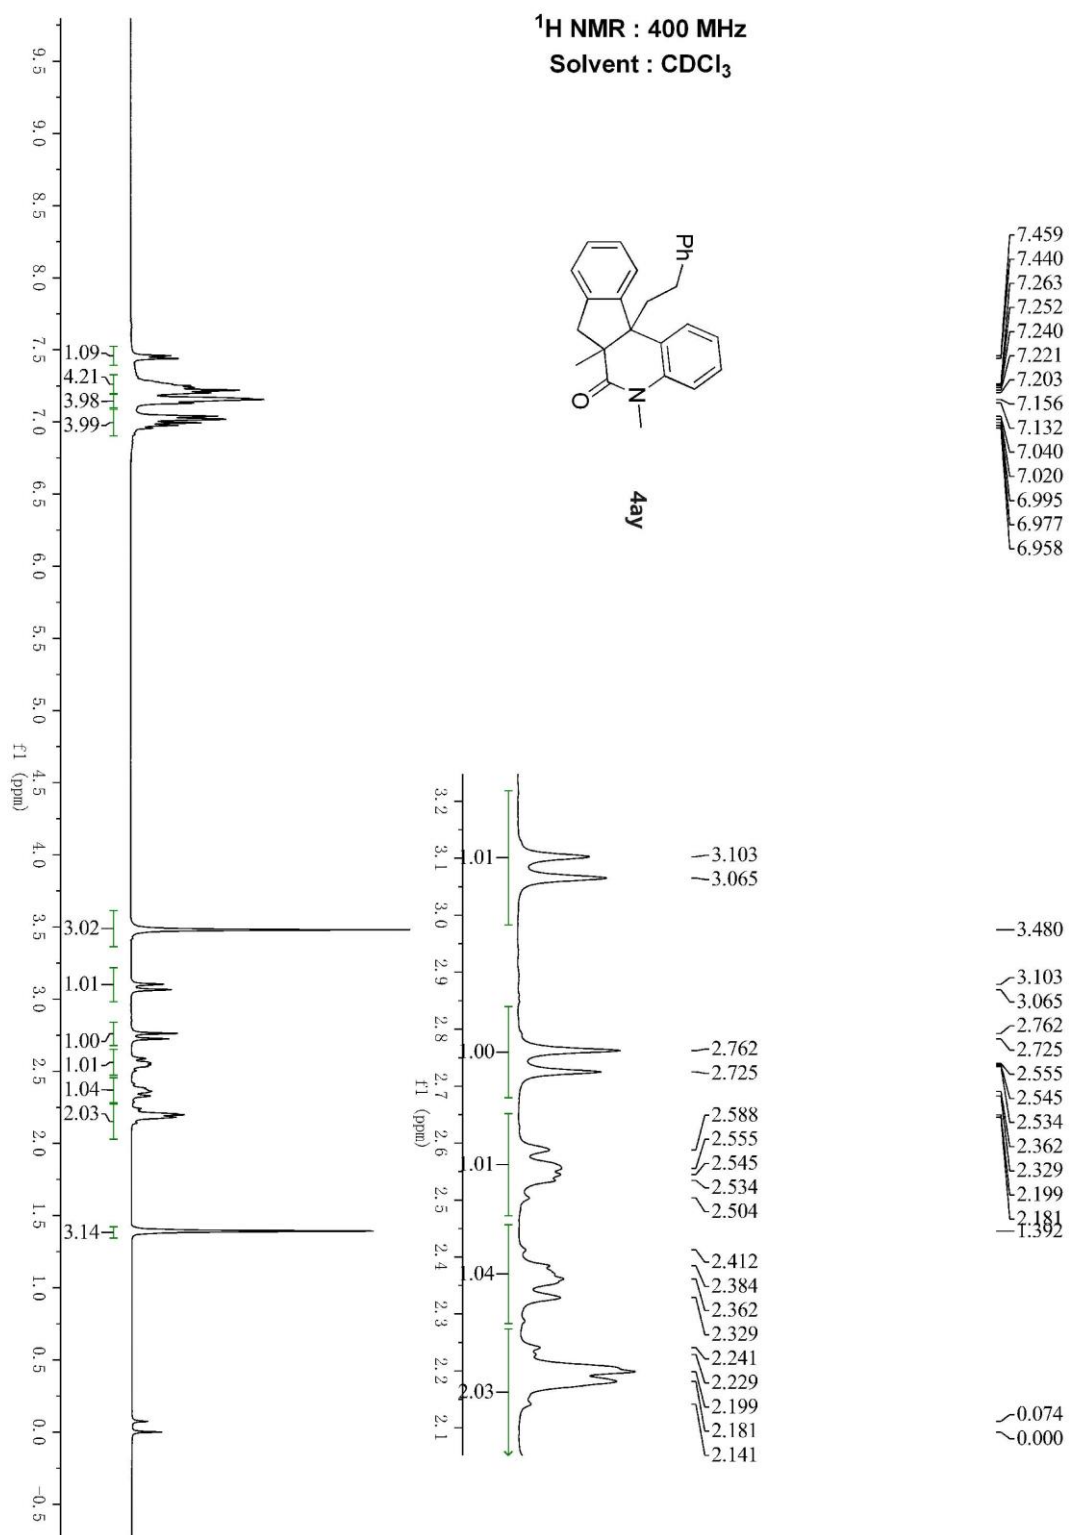

<sup>13</sup>C {<sup>1</sup>H} NMR : 100 MHz  
Solvent : CDCl<sub>3</sub>

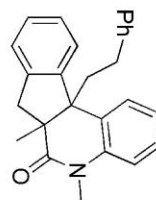

4ay

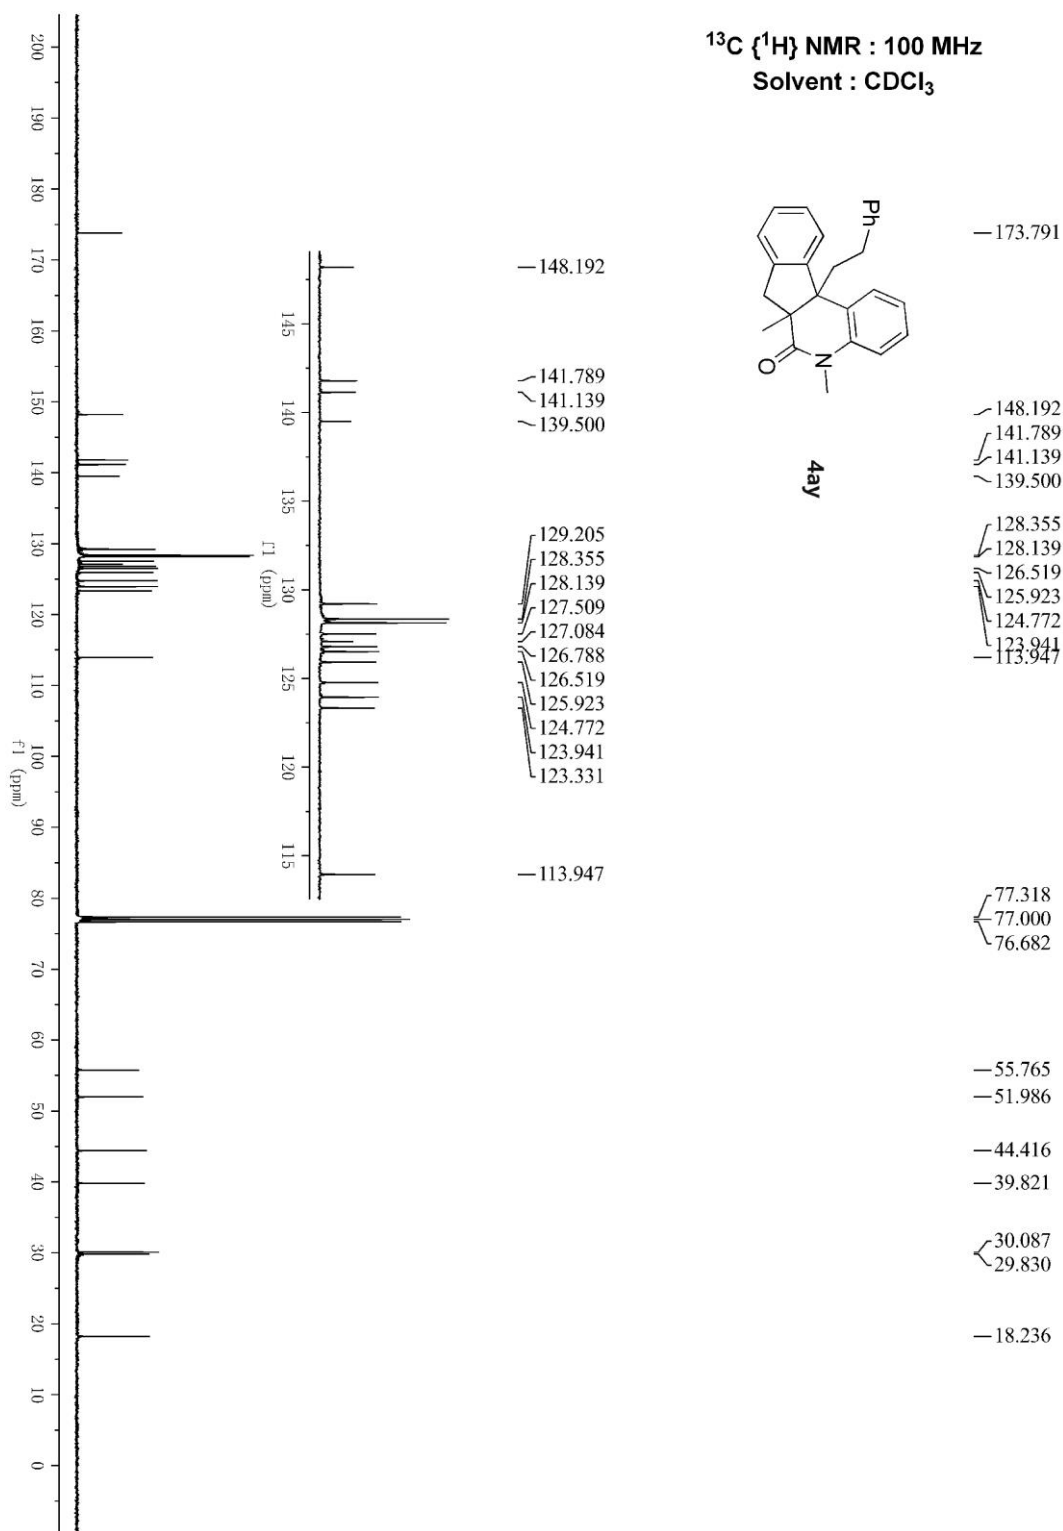

**11b-(2-(4-methoxyphenyl)-2-oxoethyl)-2,5,6a-trimethyl-5,6a,7,11b-tetrahydro-6H-indeno[2,1-c]quinolin-6-one (3ba)**

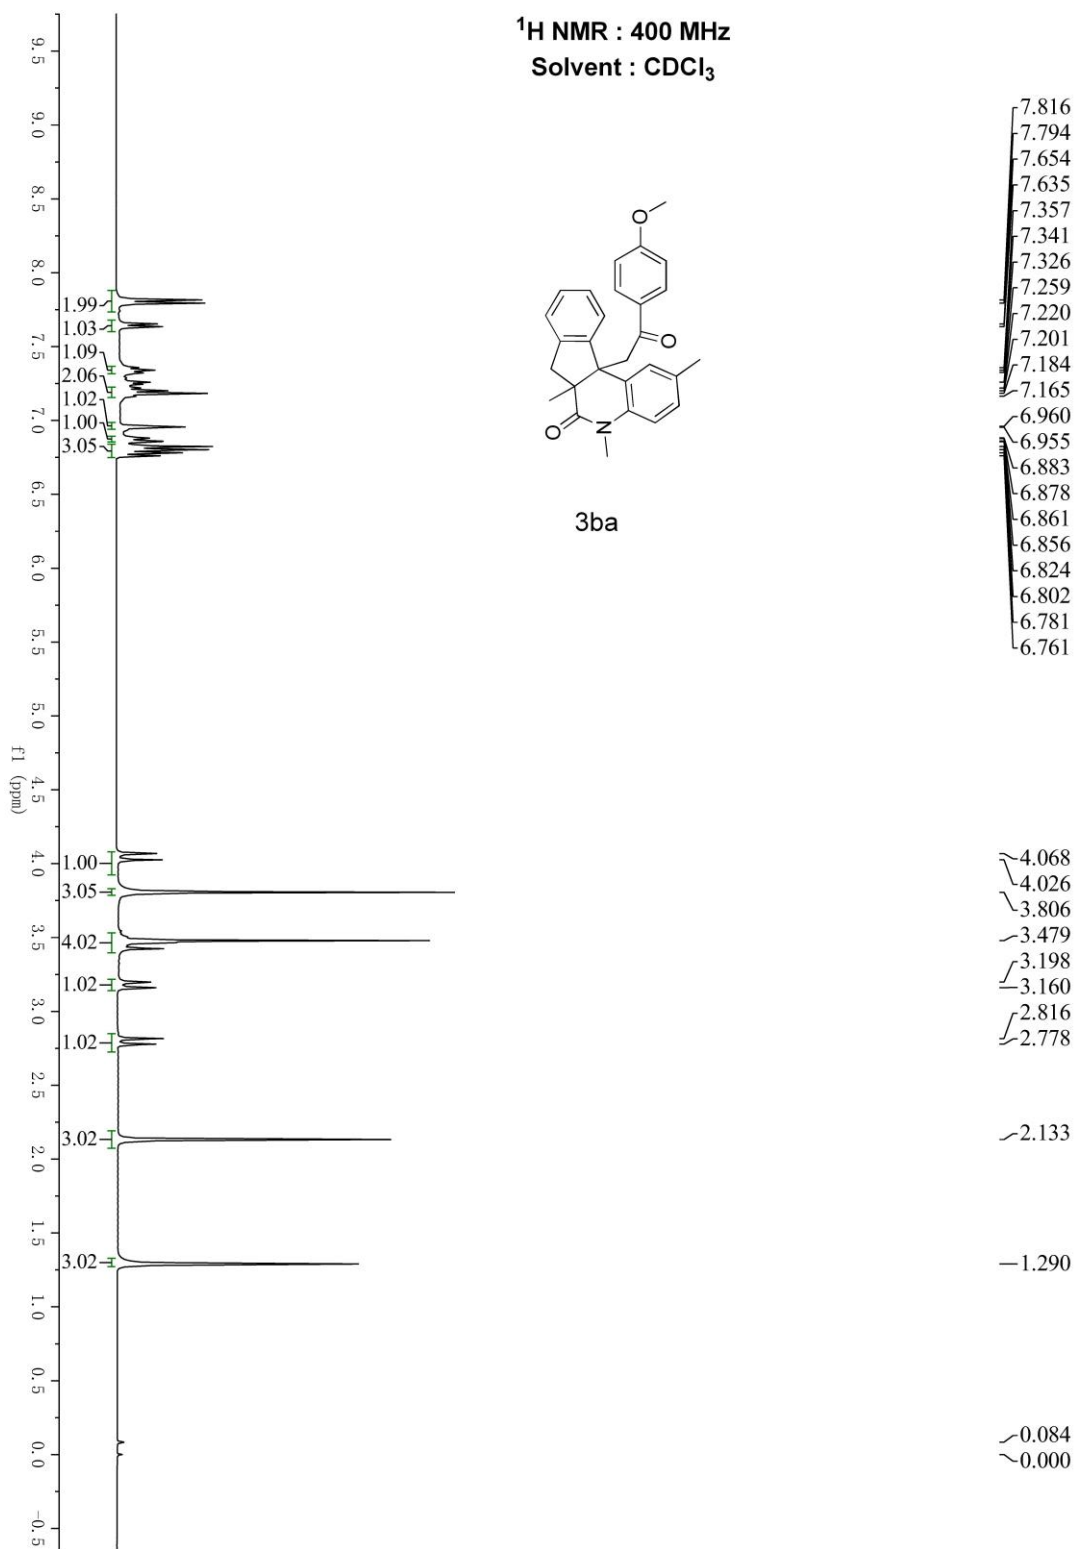

$^{13}\text{C} \{^1\text{H}\}$  NMR : 100 MHz  
Solvent :  $\text{CDCl}_3$

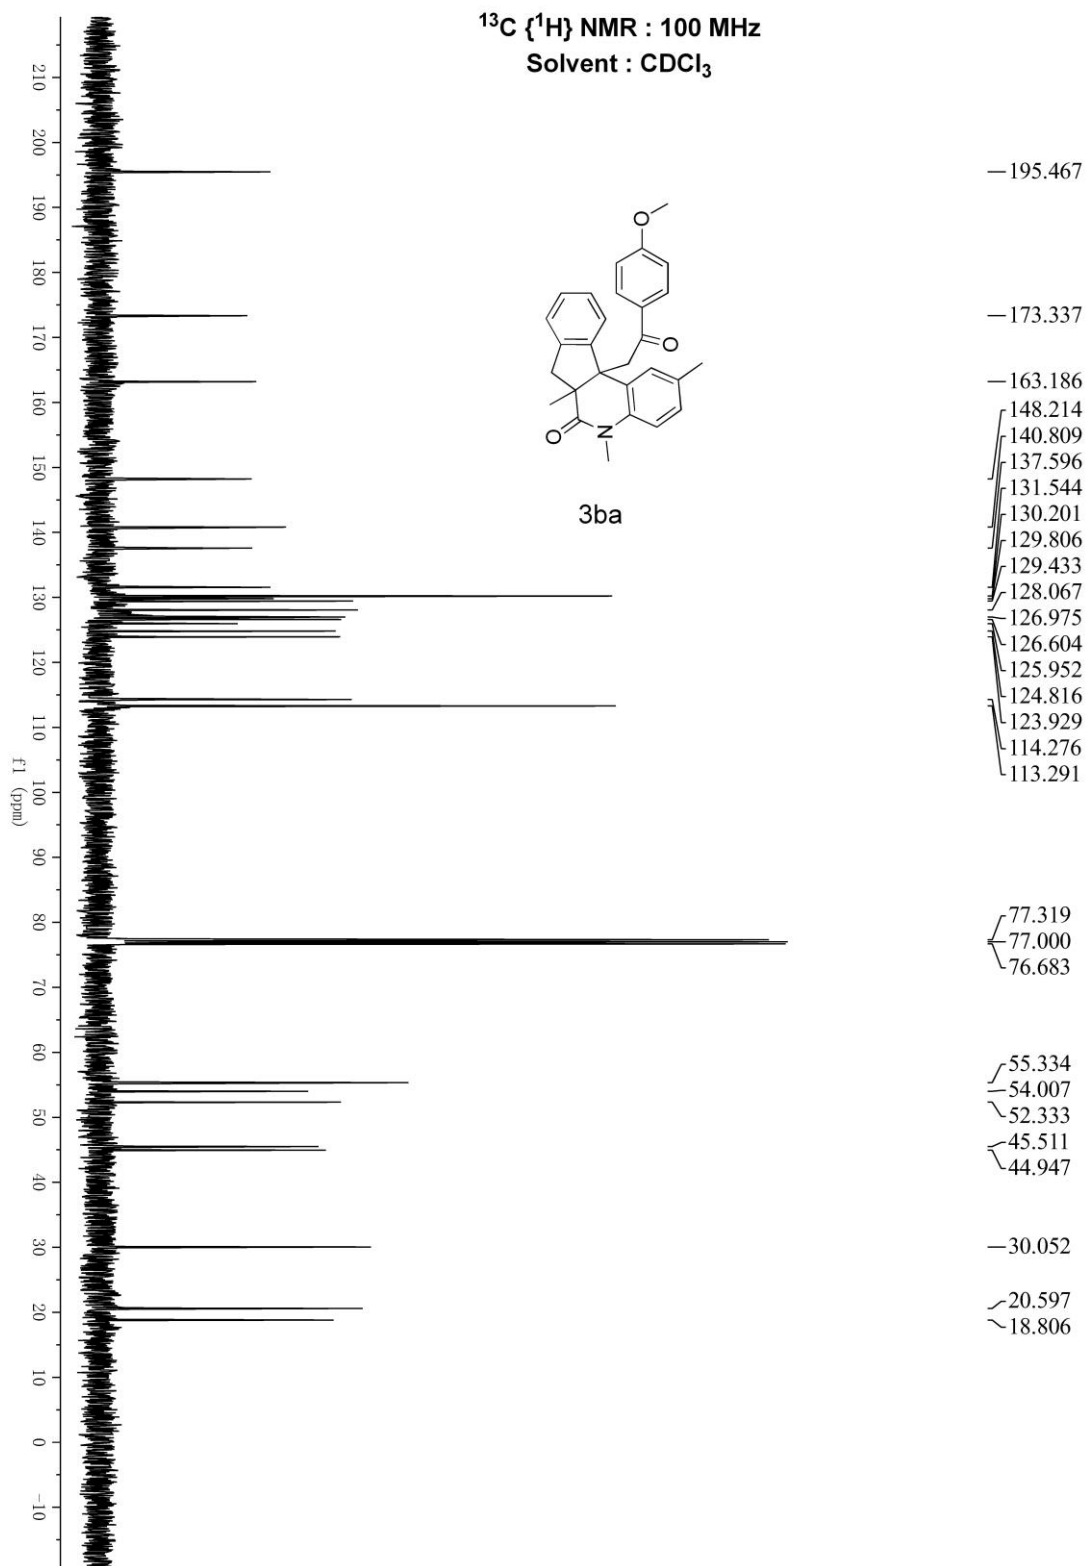



**2-ethyl-11b-(2-(4-methoxyphenyl)-2-oxoethyl)-5,6a-dimethyl-5,6a,7,11b-tetrahydro-6H-indeno[2,1-c]quinolin-6-one (3ca)**

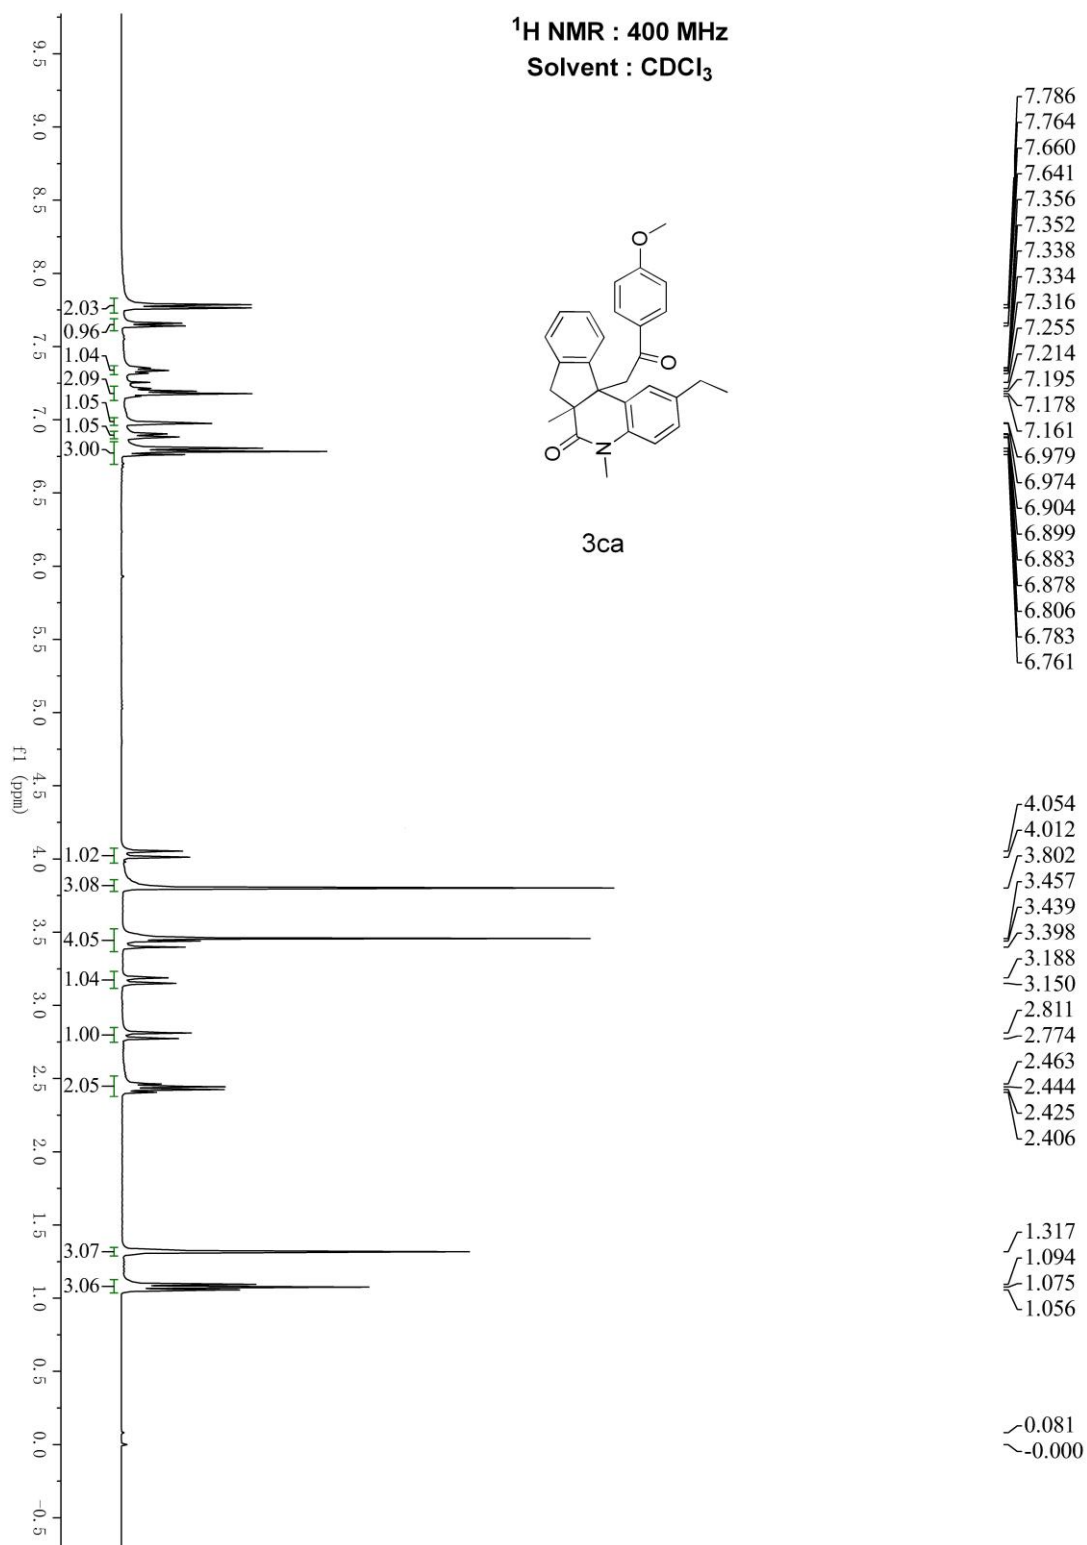

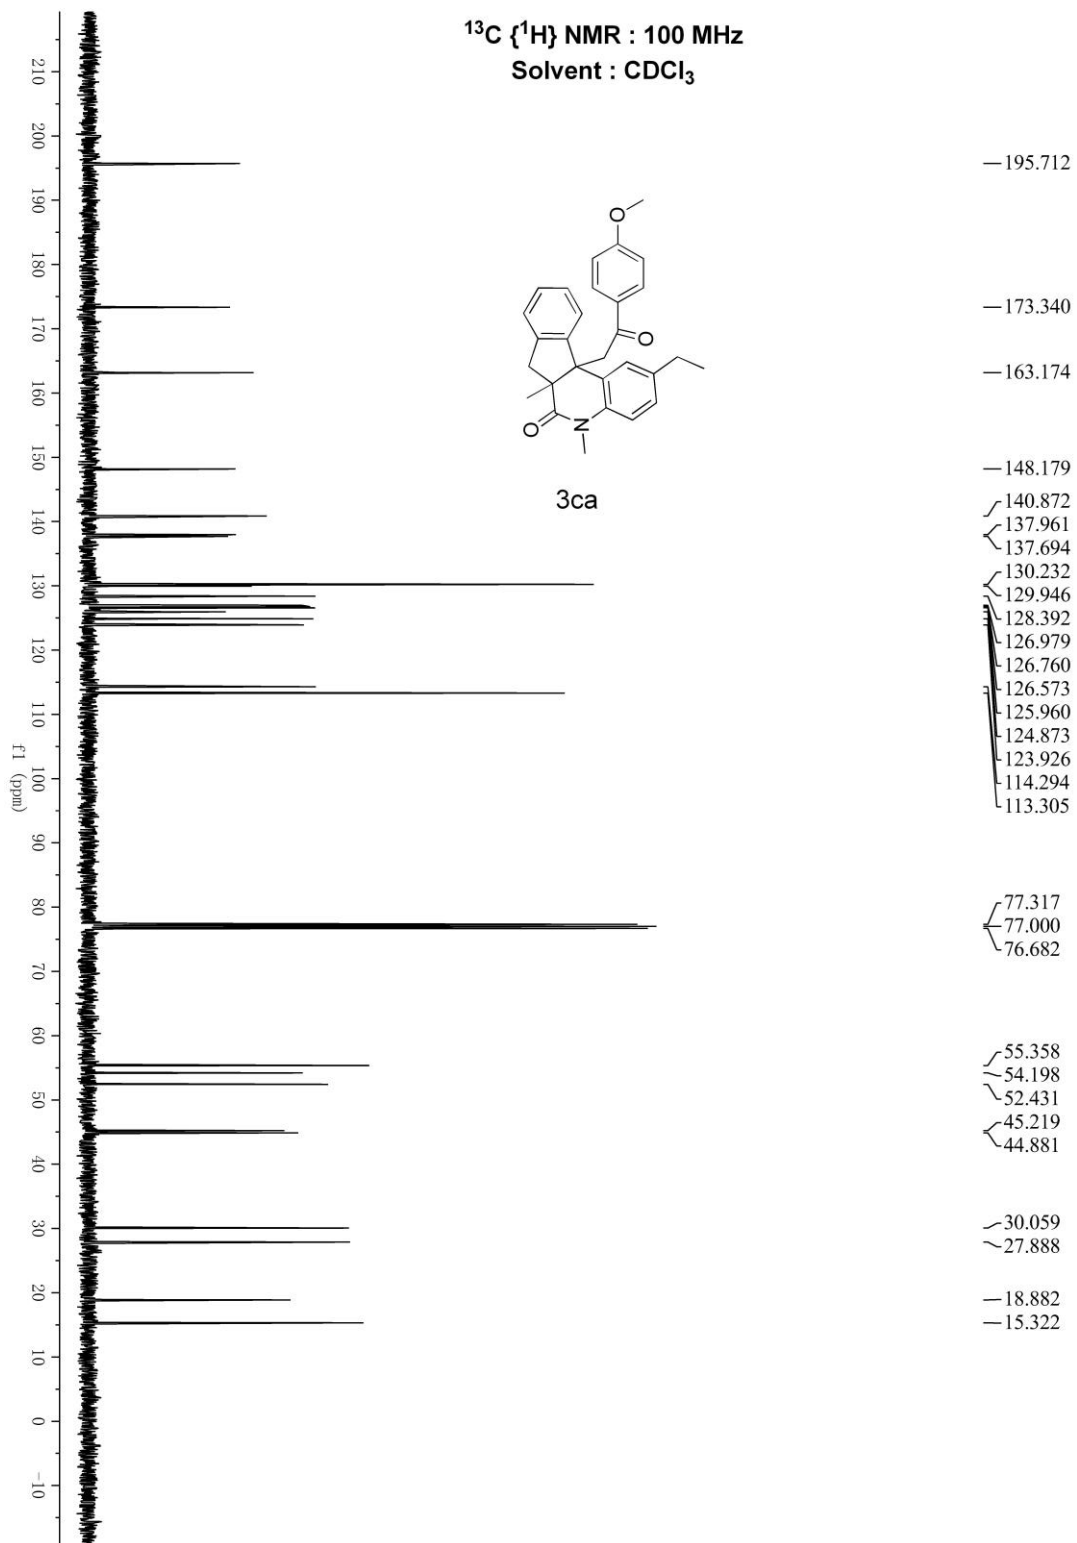

**2-isopropyl-11b-(2-(4-methoxyphenyl)-2-oxoethyl)-5,6a-dimethyl-5,6,7,11b-tetrahydro-6H-indeno[2,1-c]quinolin-6-one (3da)**

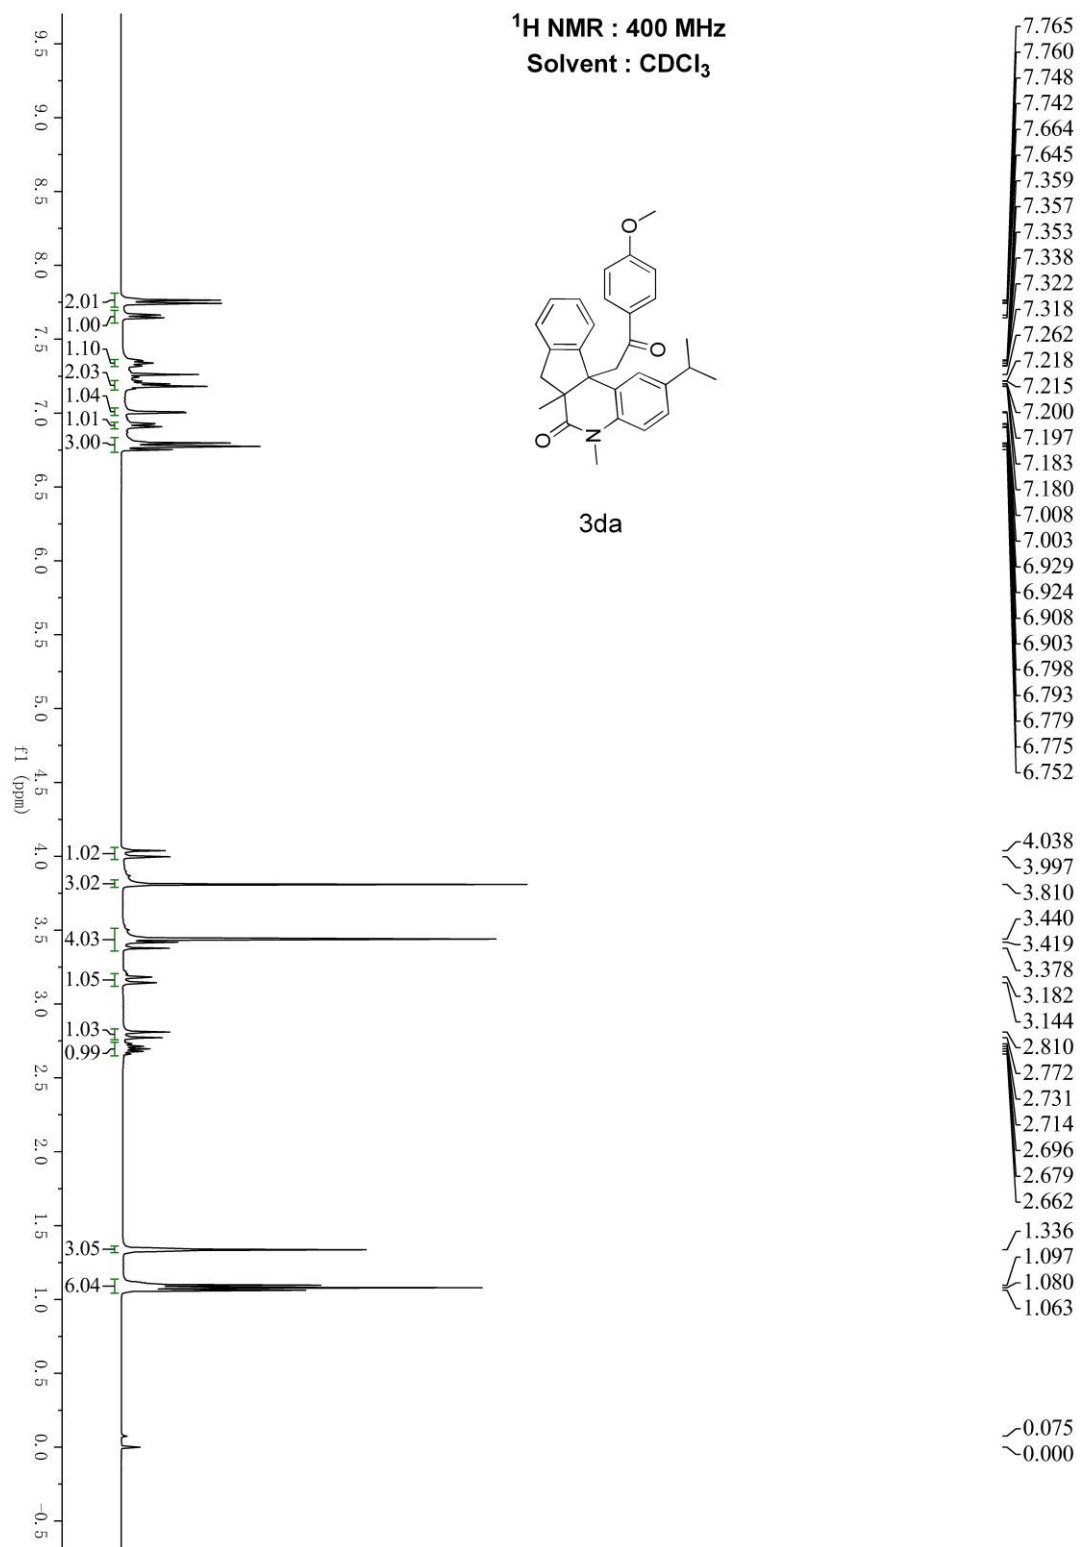

$^{13}\text{C}$   $\{^1\text{H}\}$  NMR : 100 MHz  
Solvent :  $\text{CDCl}_3$

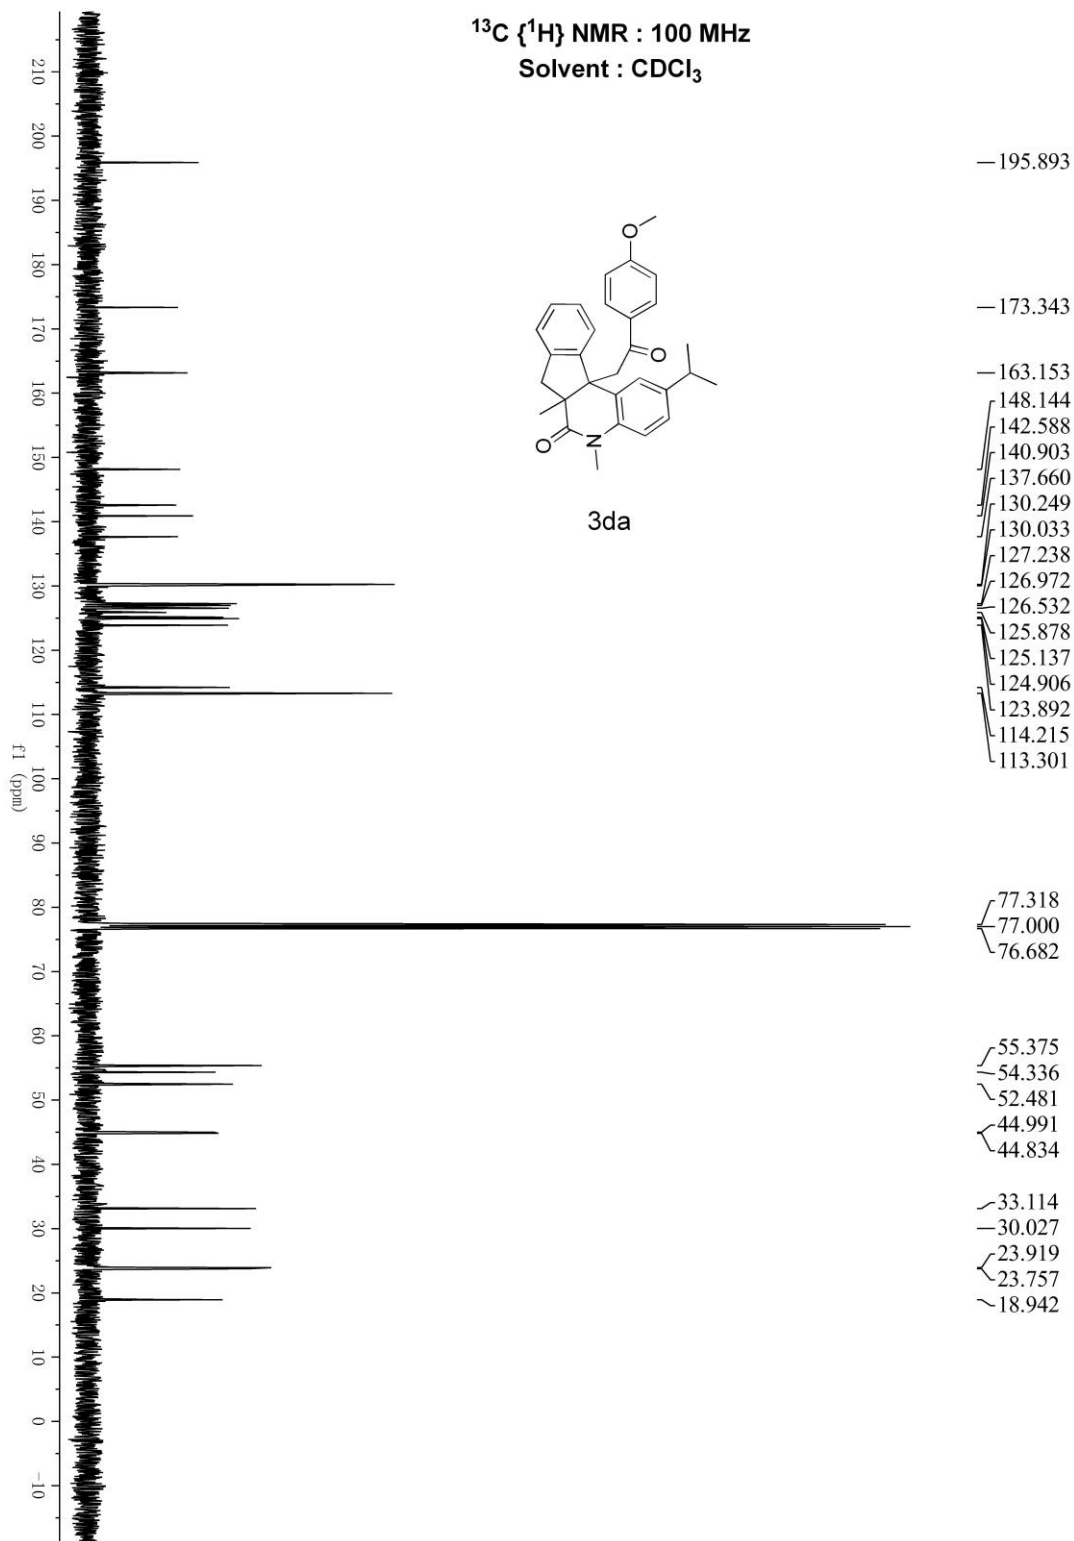

**2-(tert-butyl)-11b-(2-(4-methoxyphenyl)-2-oxoethyl)-5,6a-dimethyl-5,6a,7,11b-tetrahydro-6H-indeno[2,1-c]quinolin-6-one (3ea)**

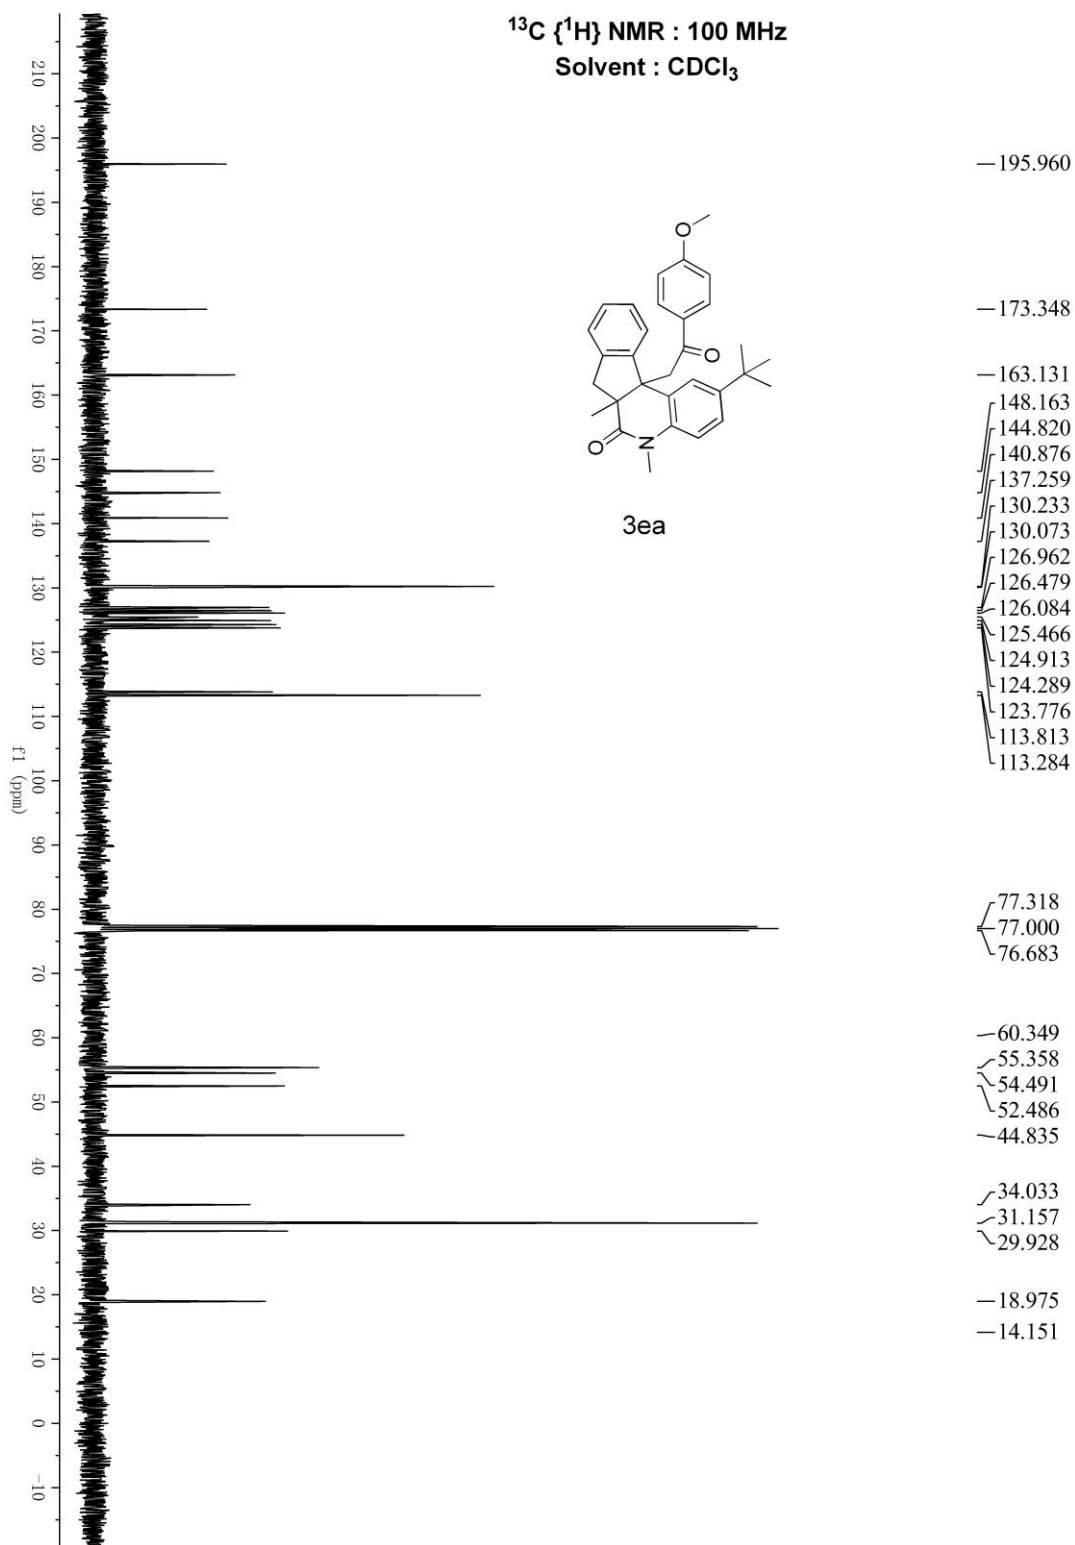

<sup>1</sup>H NMR : 400 MHz  
Solvent : CDCl<sub>3</sub>

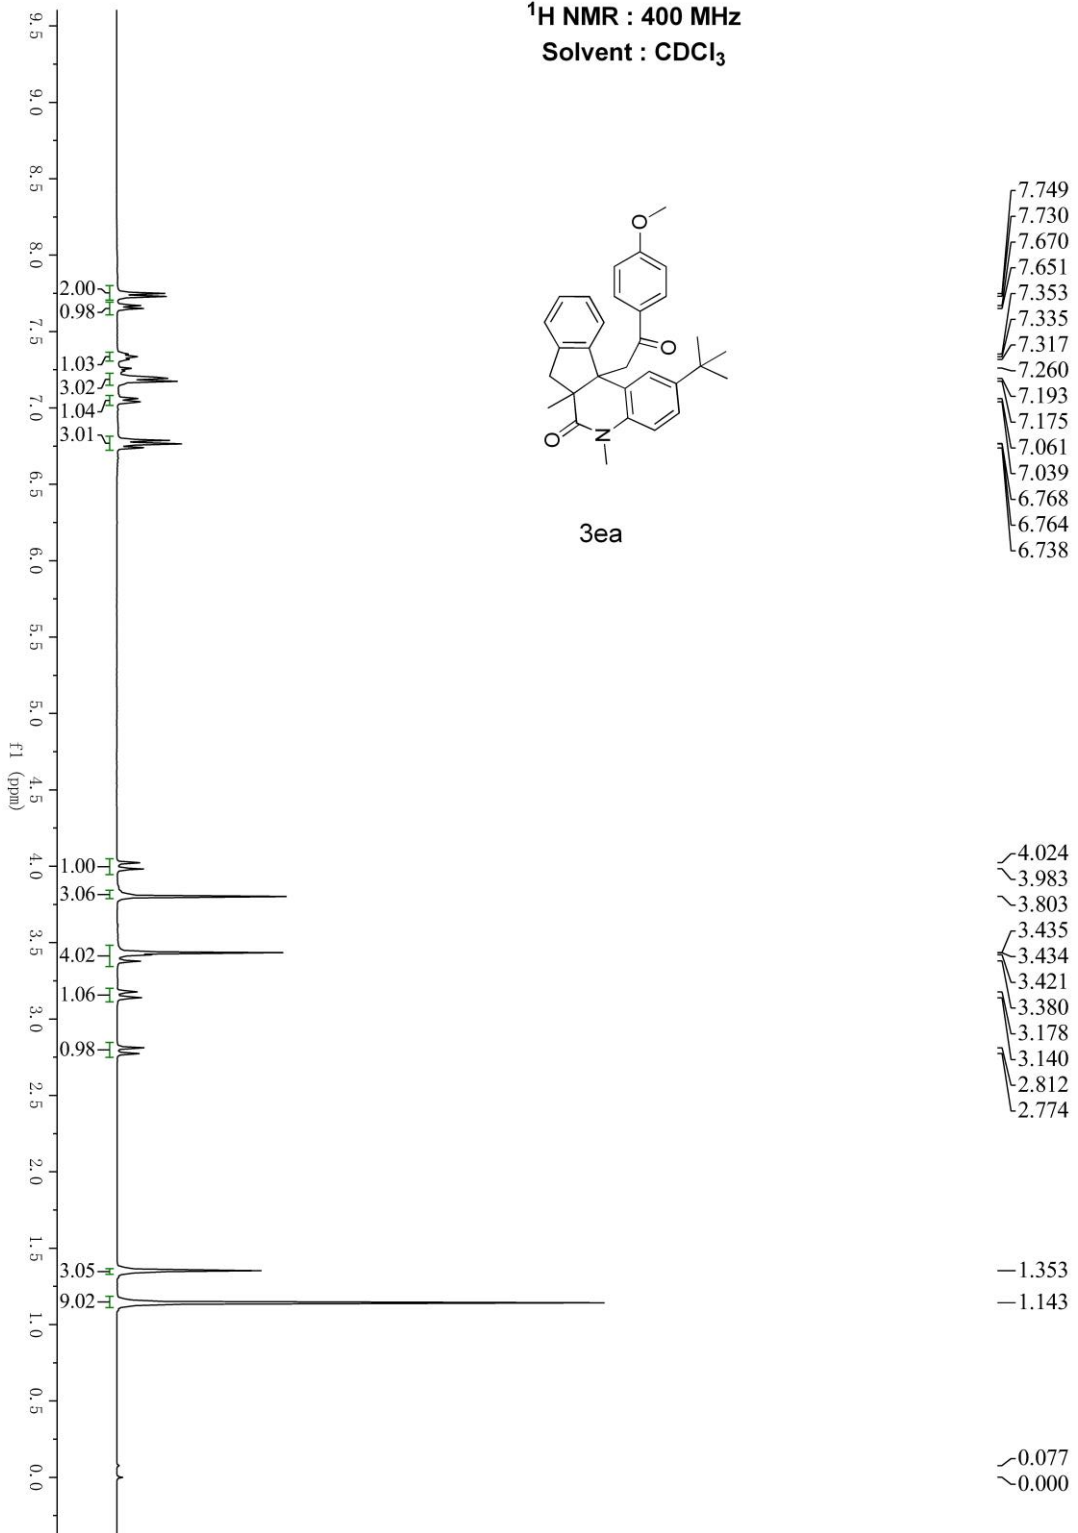

**2-methoxy-11b-(2-(4-methoxyphenyl)-2-oxoethyl)-5,6a-dimethyl-5,6a,7,11b-tetrahydro-6H-indeno[2,1-c]quinolin-6-one (3fa)**

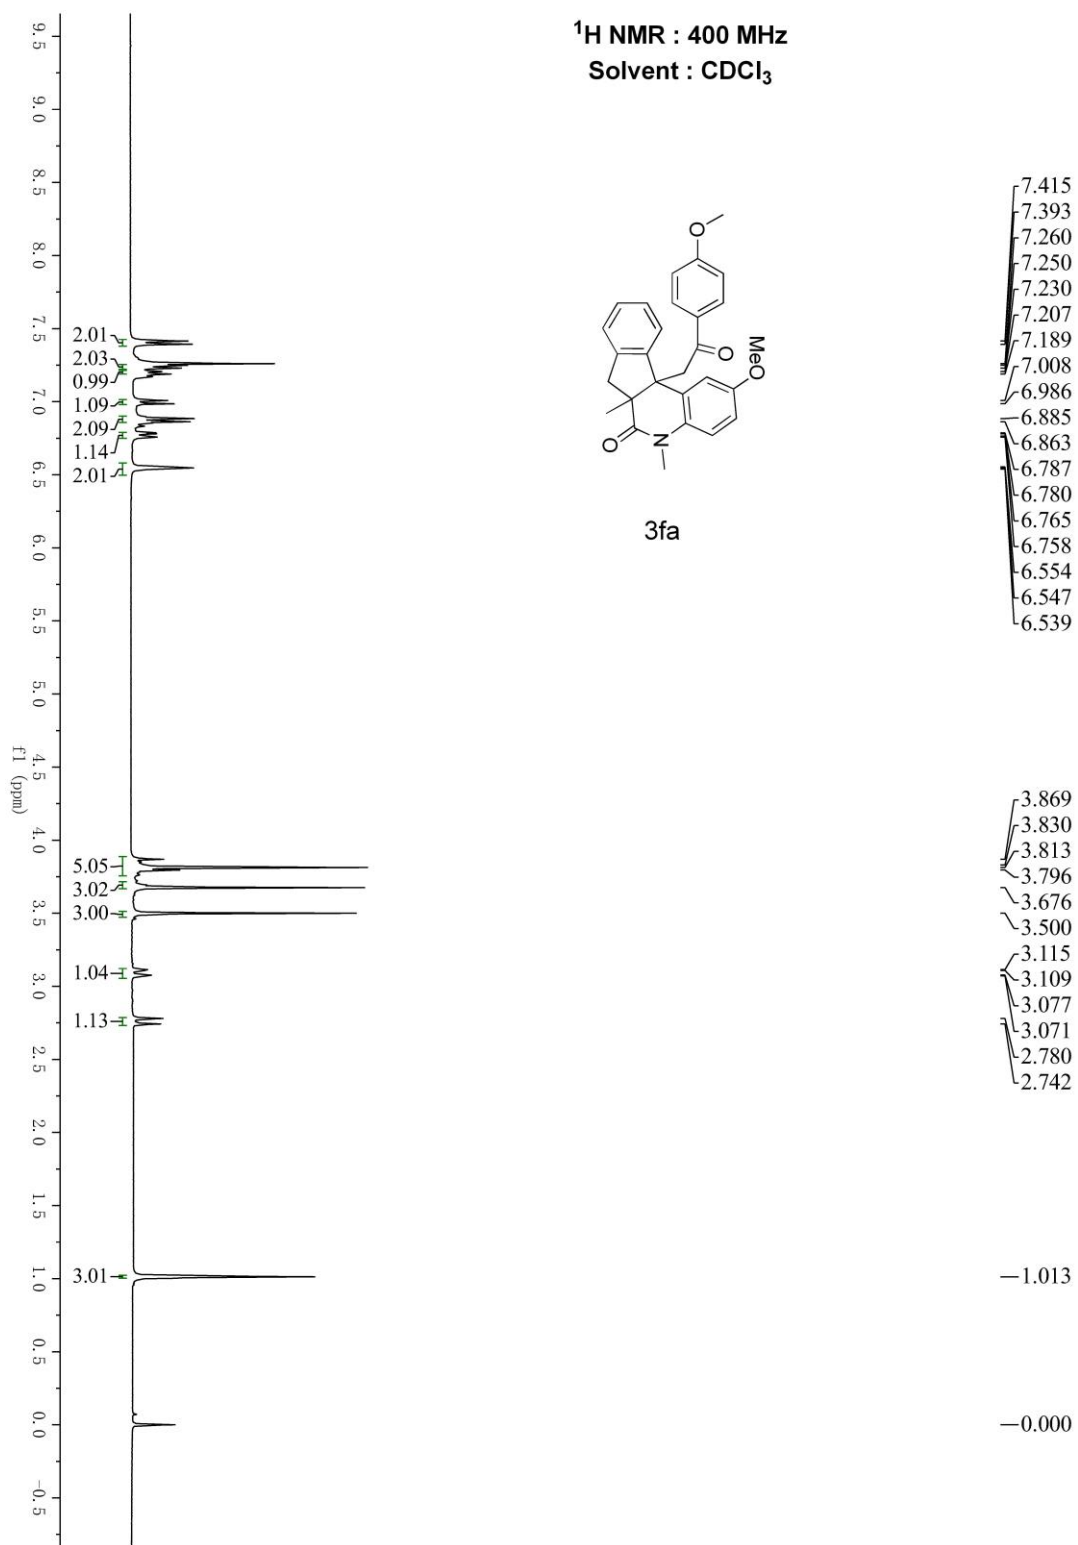

$^{13}\text{C}$   $\{^1\text{H}\}$  NMR : 100 MHz  
Solvent :  $\text{CDCl}_3$

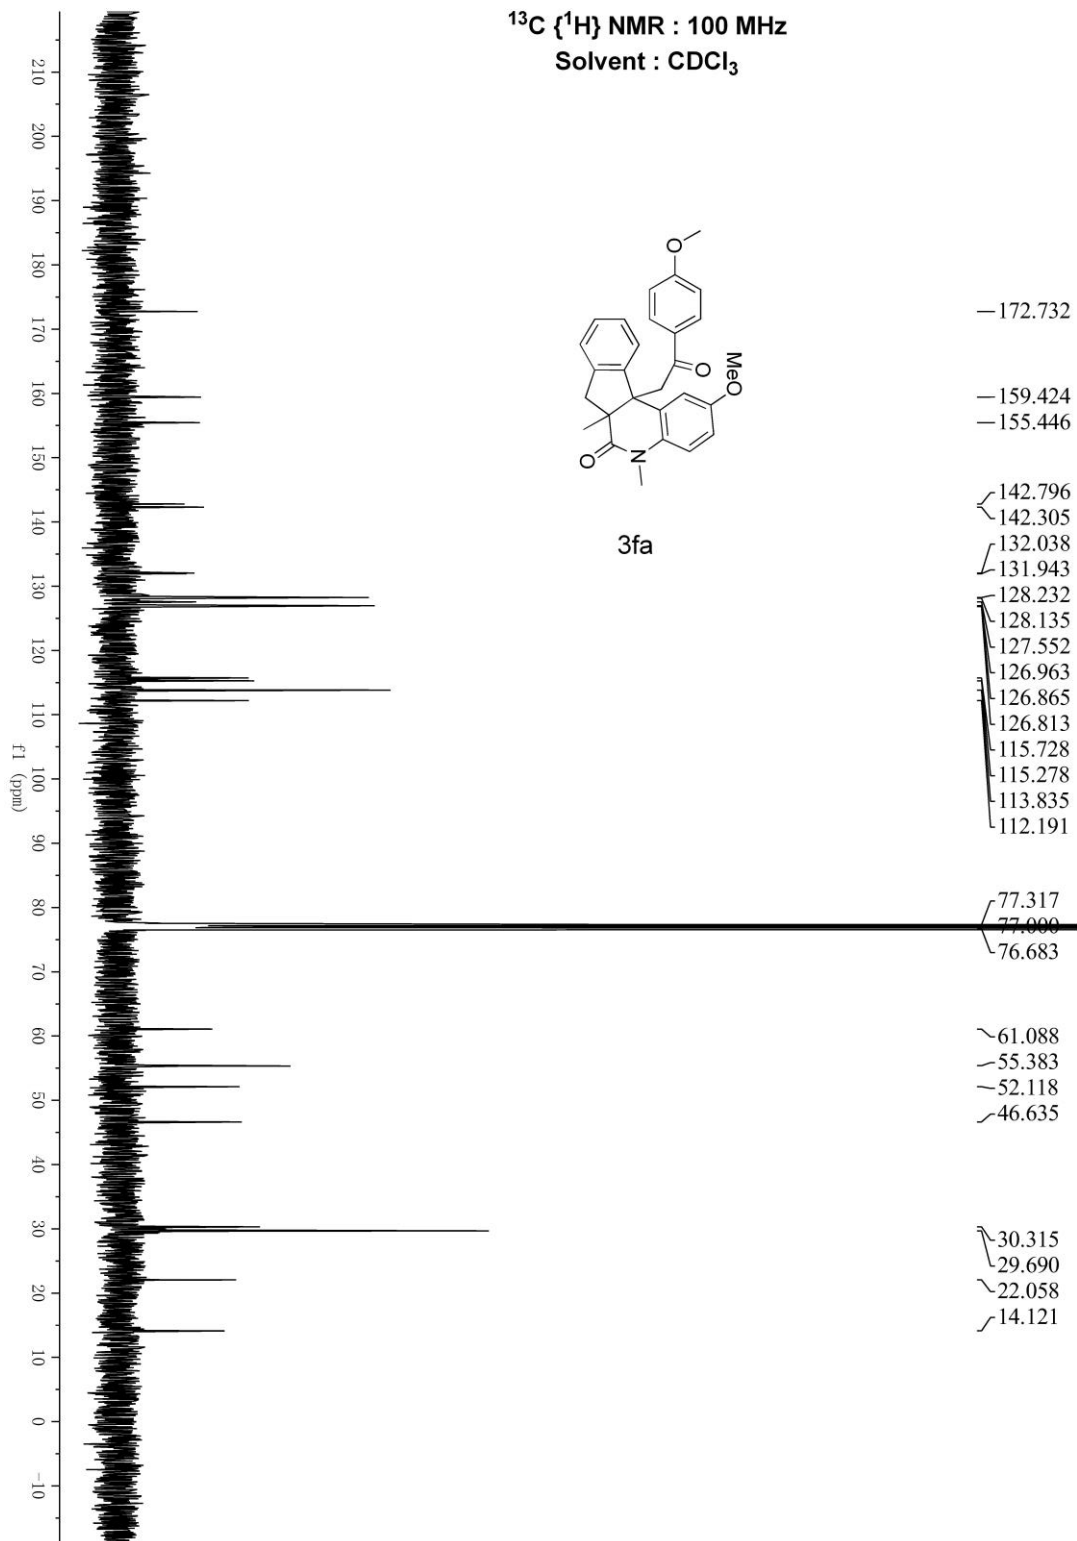



**2-fluoro-11b-(2-(4-methoxyphenyl)-2-oxoethyl)-5,6a-dimethyl-5,6a,7,11b-tetrahydro-6H-indeno[2,1-c]quinolin-6-one (3ga)**

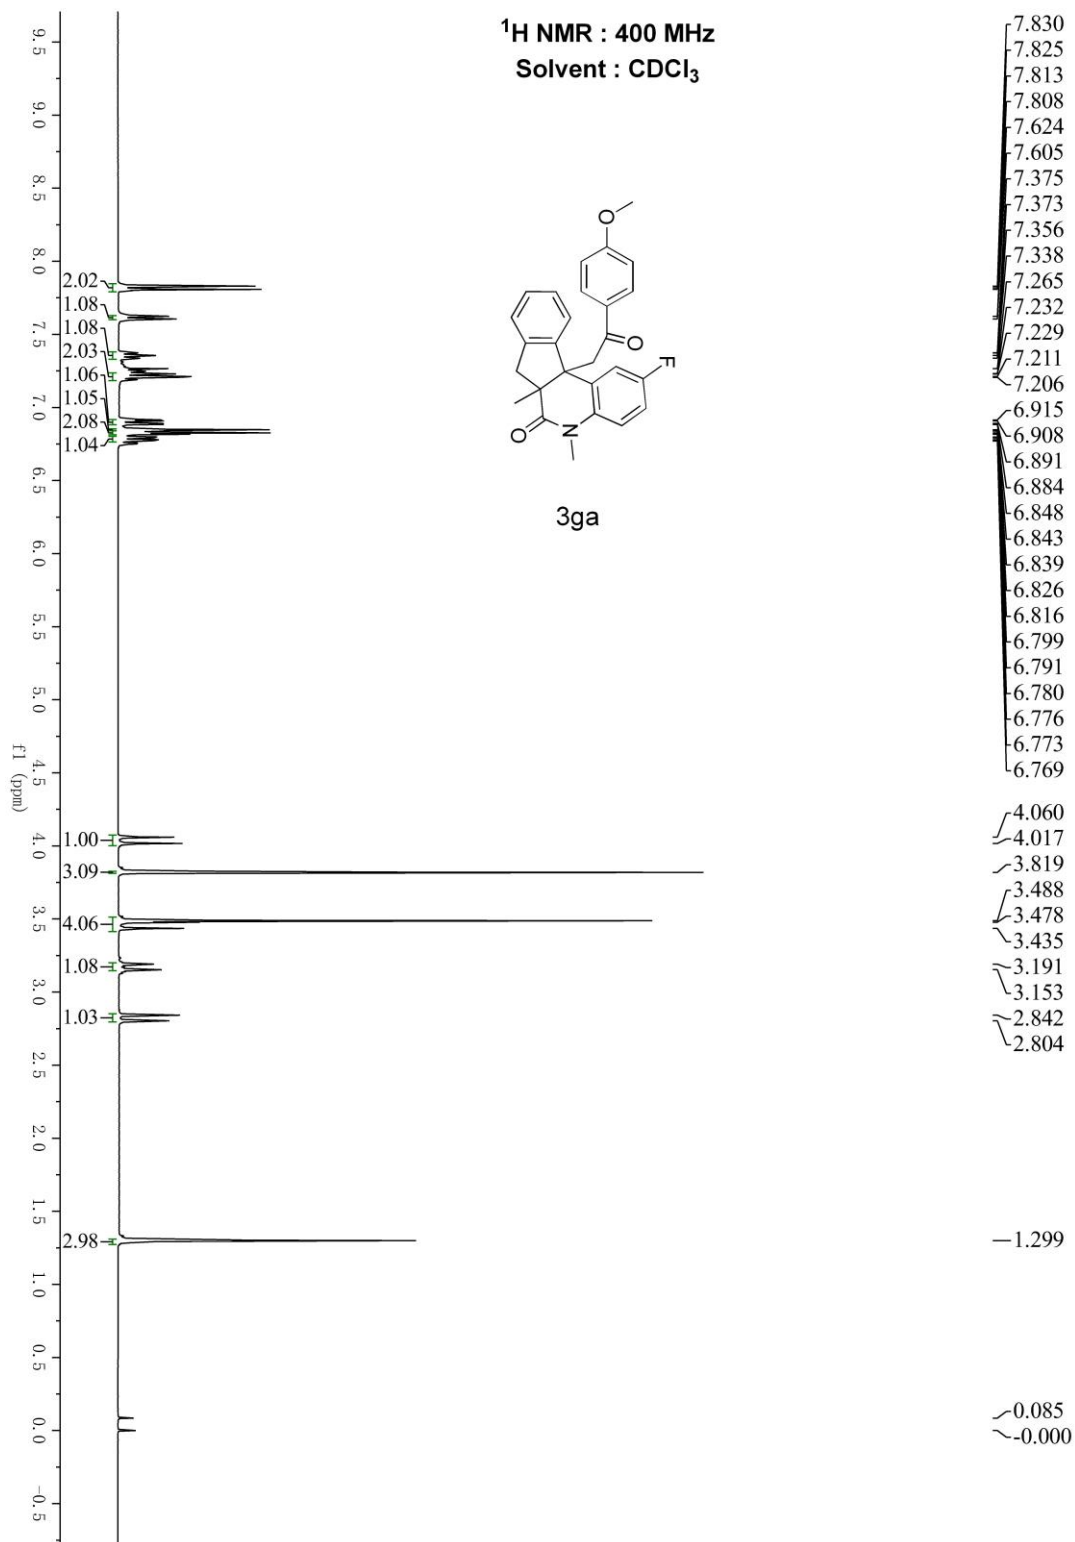

$^{19}\text{F}$  NMR : 282 MHz  
Solvent :  $\text{CDCl}_3$

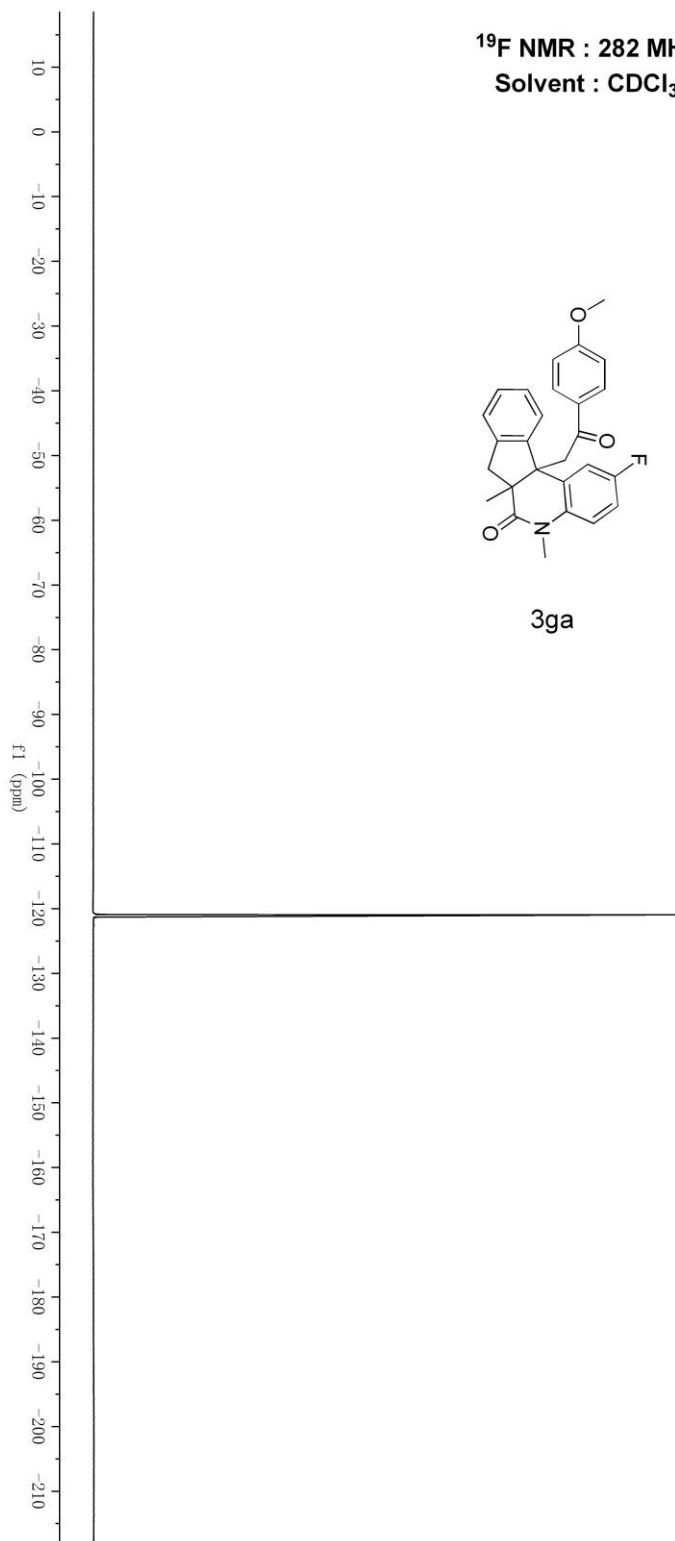

--120.947

$^{13}\text{C} \{^1\text{H}\}$  NMR : 100 MHz  
Solvent :  $\text{CDCl}_3$

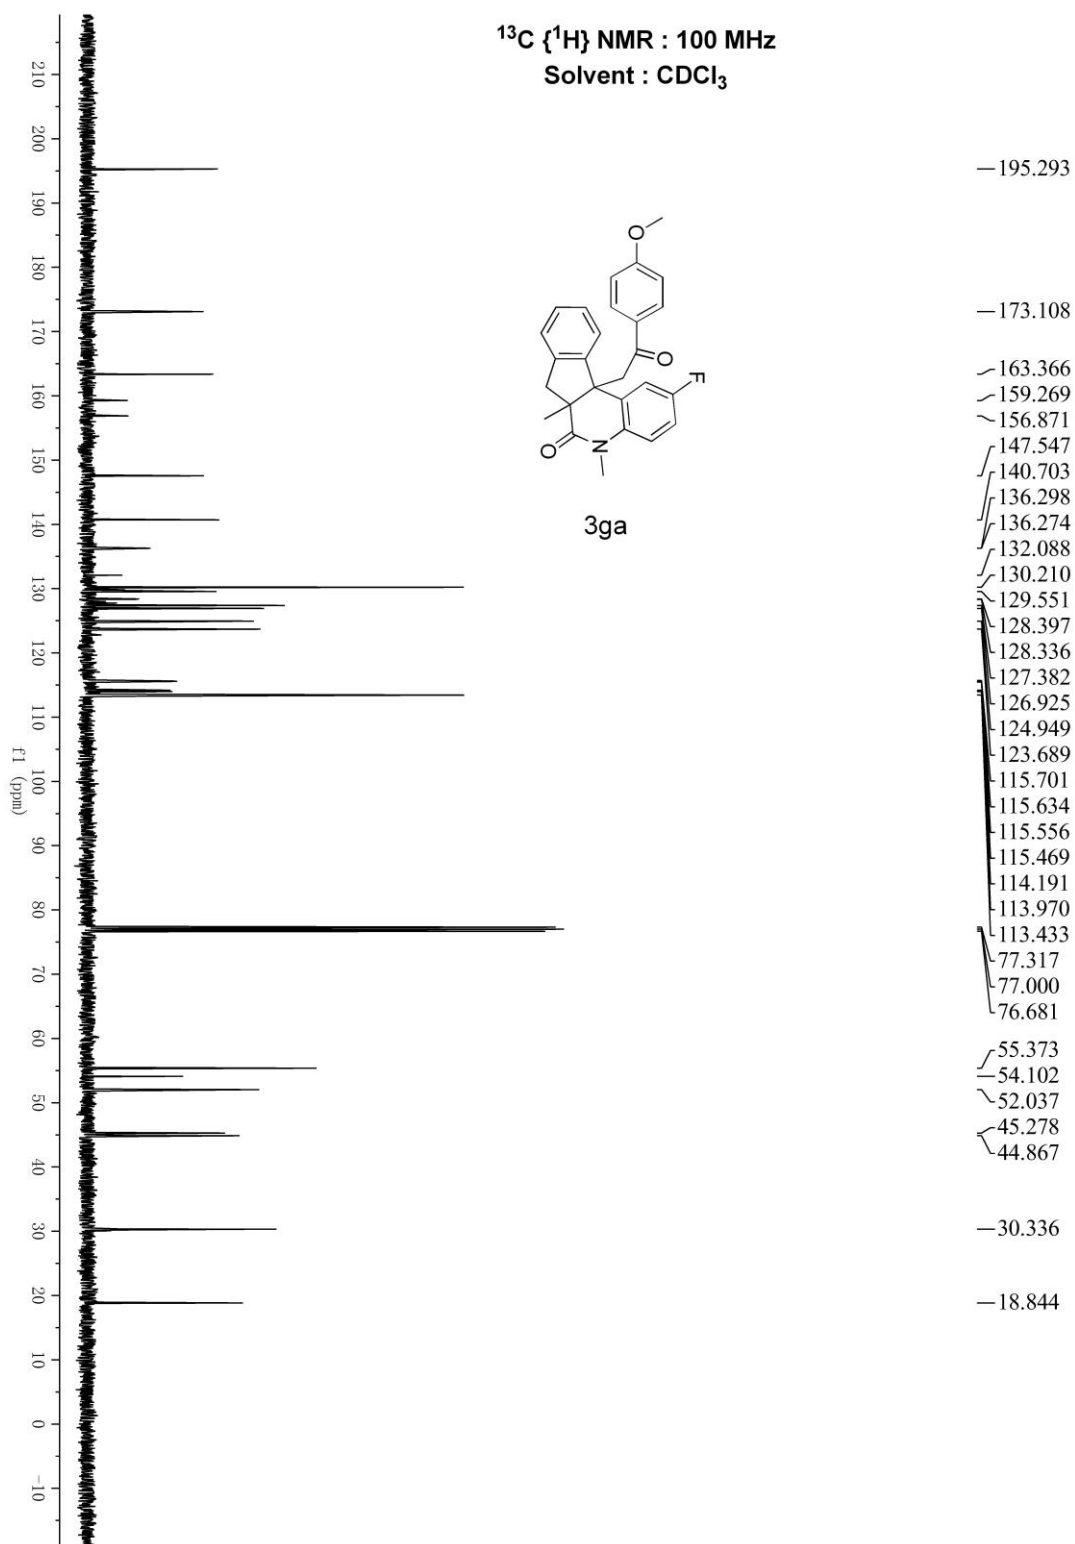

**2-chloro-11b-(2-(4-methoxyphenyl)-2-oxoethyl)-5,6a-dimethyl-5,6a,7,11b-tetrahydro-6H-indeno[2,1-c]quinolin-6-one (3ha)**

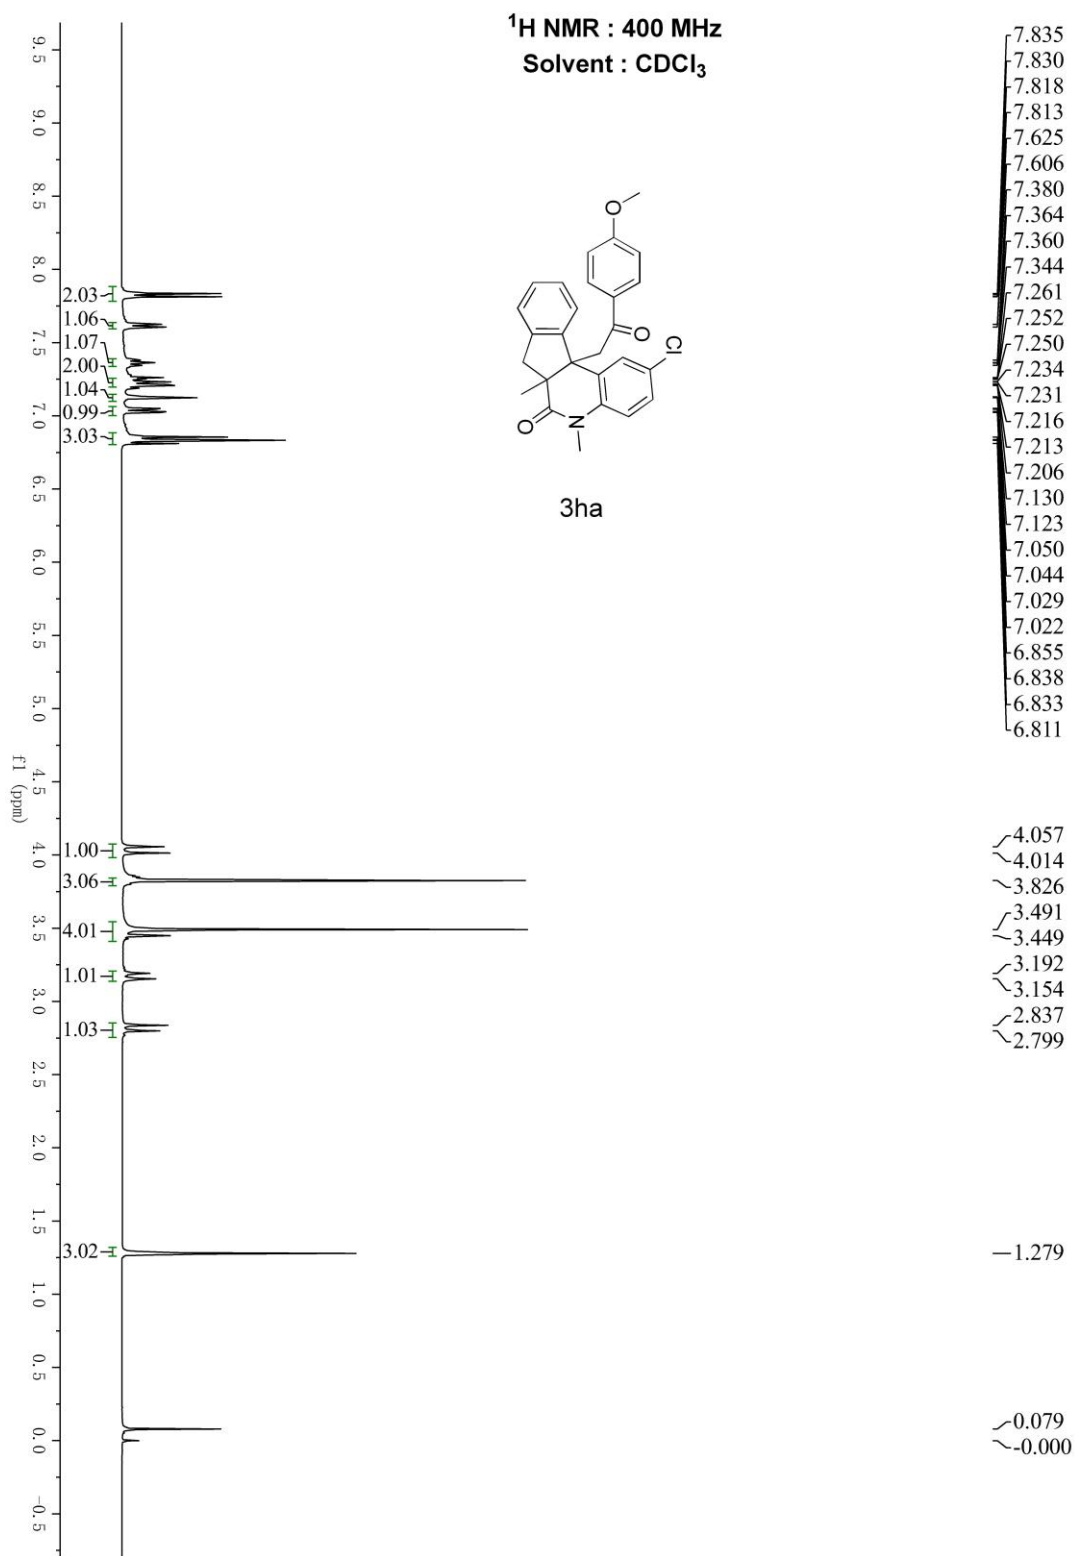

$^{13}\text{C}$   $\{^1\text{H}\}$  NMR : 100 MHz  
Solvent :  $\text{CDCl}_3$

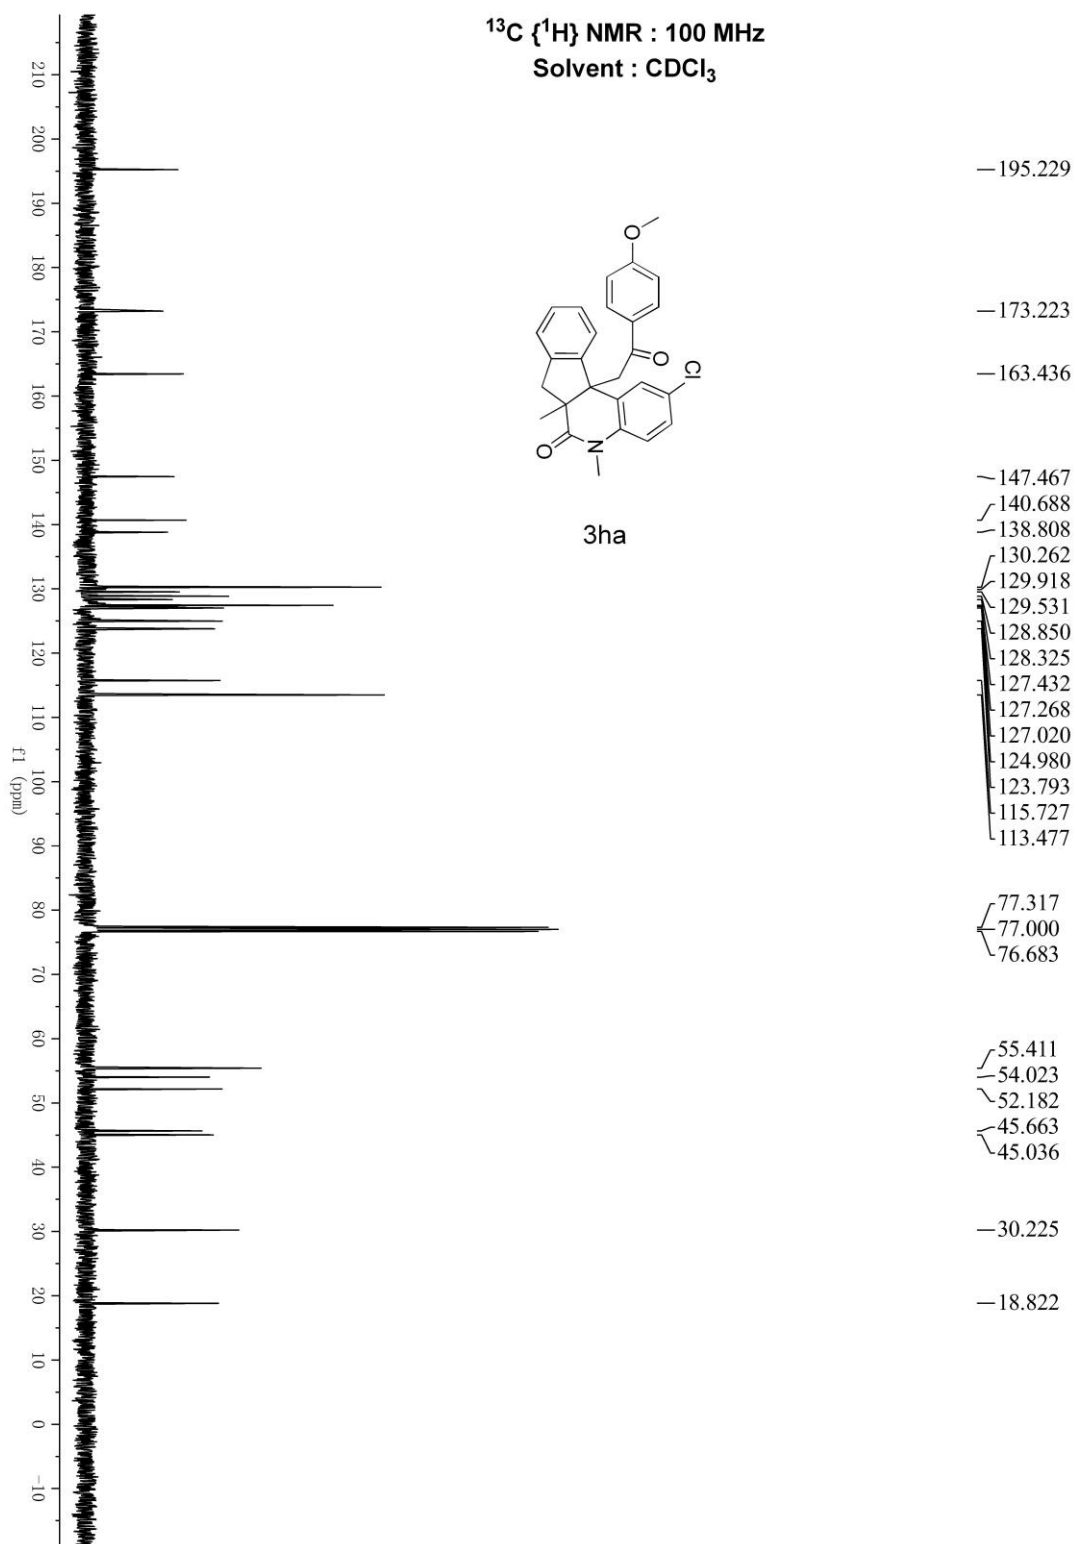

**2-bromo-11b-(2-(4-methoxyphenyl)-2-oxoethyl)-5,6a-dimethyl-5,6a,7,11b-tetrahydro-6H-indeno[2,1-c]quinolin-6-one (3ia)**

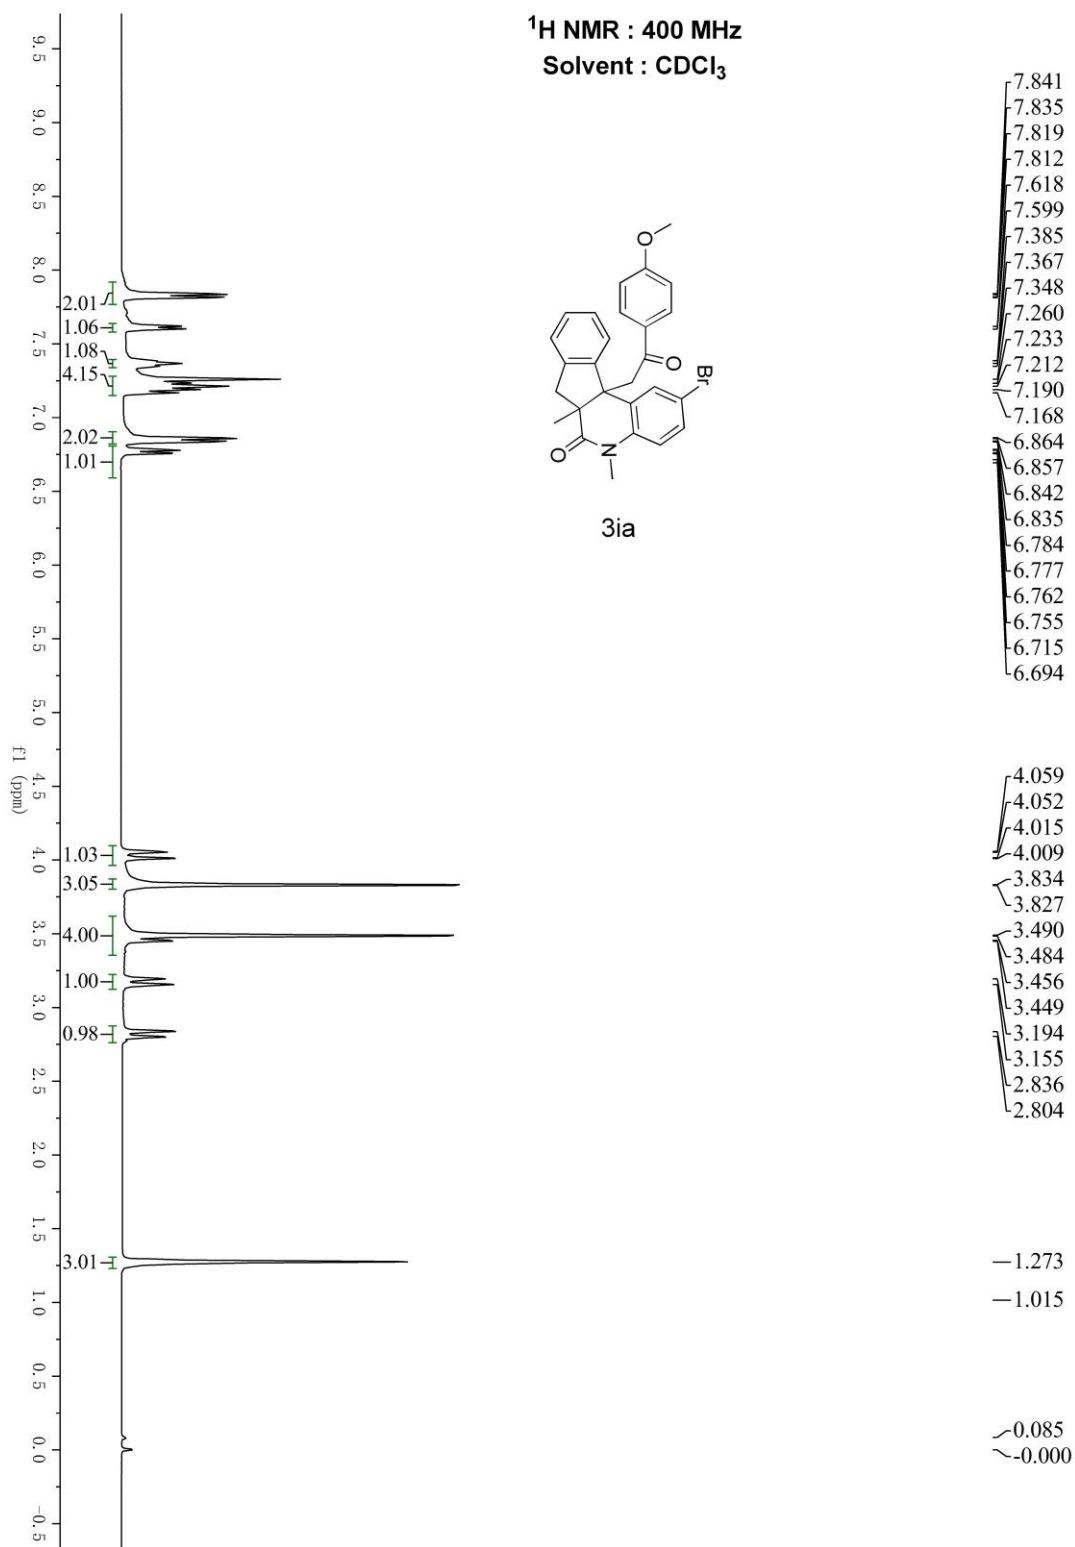

$^{13}\text{C} \{^1\text{H}\}$  NMR : 100 MHz  
Solvent :  $\text{CDCl}_3$

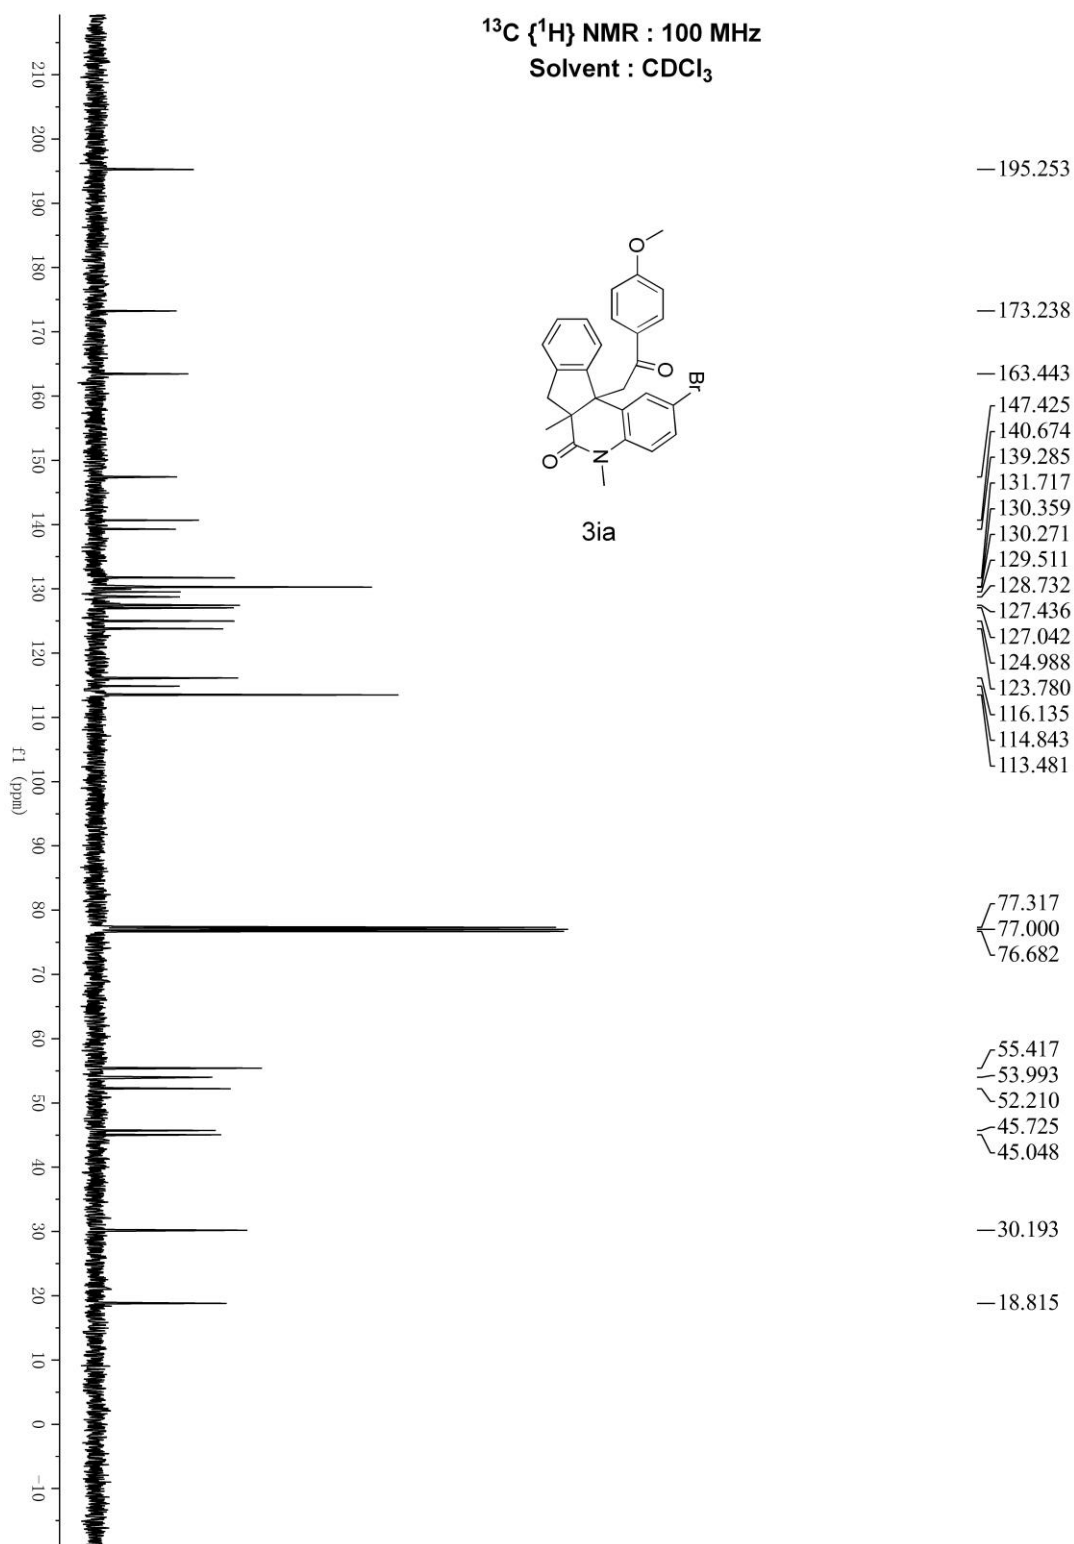

**11b-(2-(4-methoxyphenyl)-2-oxoethyl)-5,6a-dimethyl-6-oxo-6,6a,7,11b-tetrahydro-5H-indeno[2,1-c]quinoline-2-carbonitrile (3ja)**

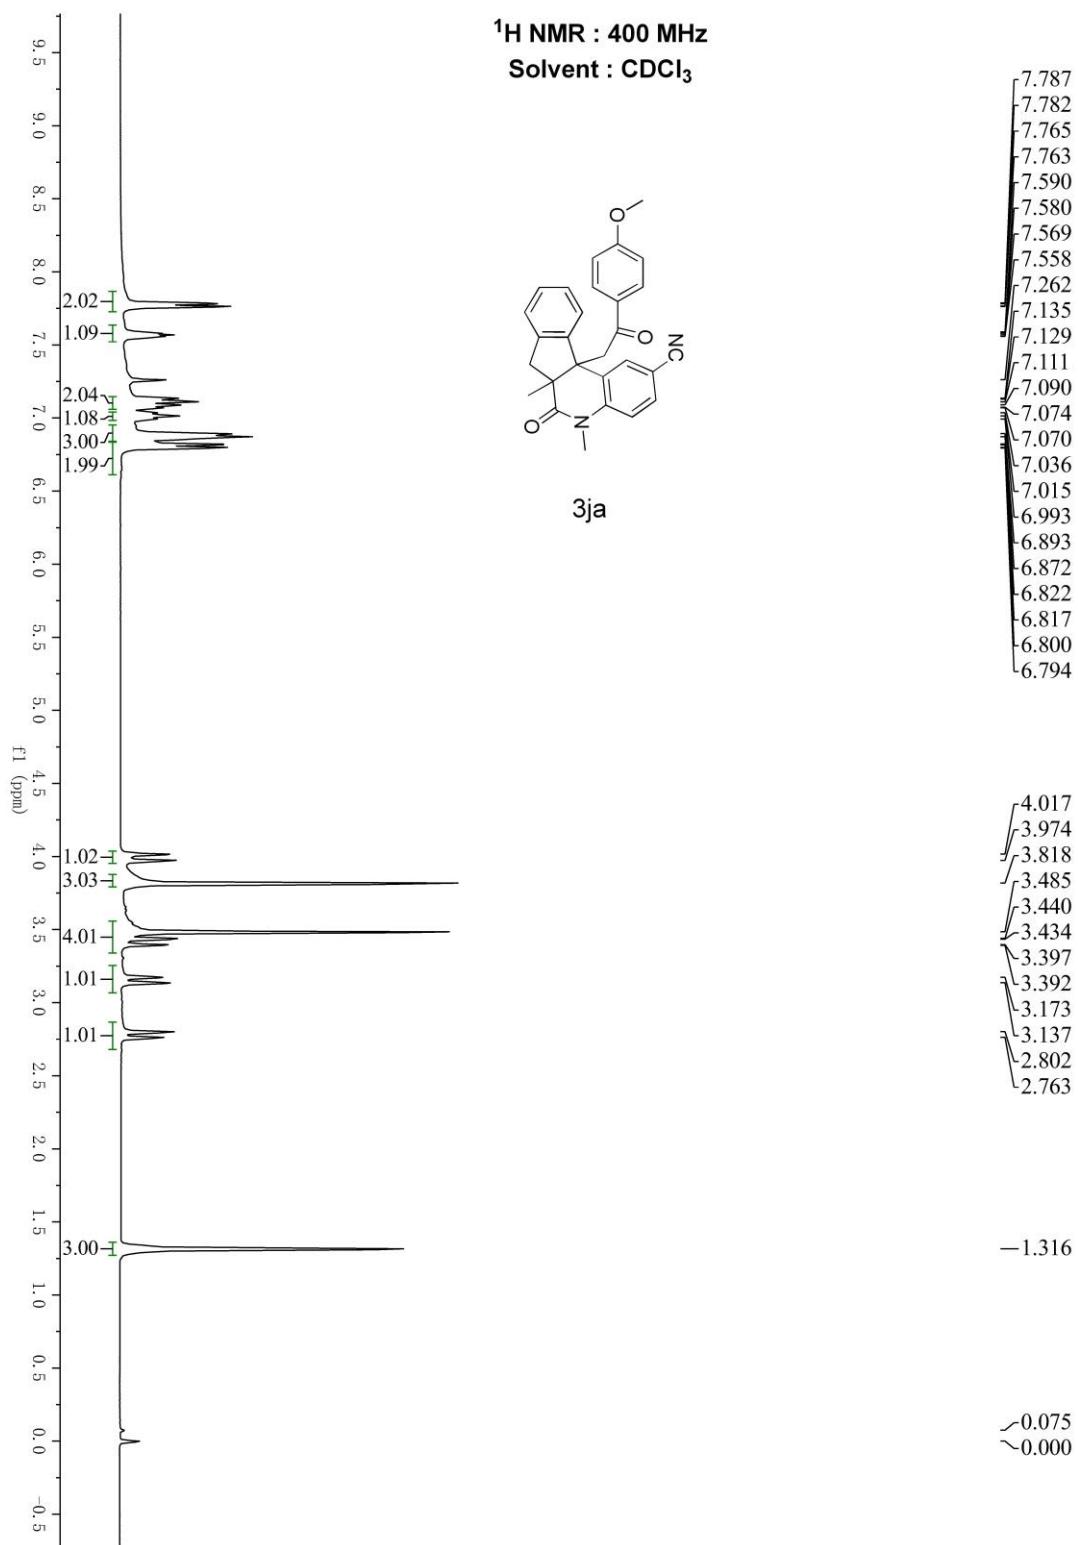



$^{13}\text{C} \{^1\text{H}\}$  NMR : 100 MHz  
Solvent :  $\text{CDCl}_3$

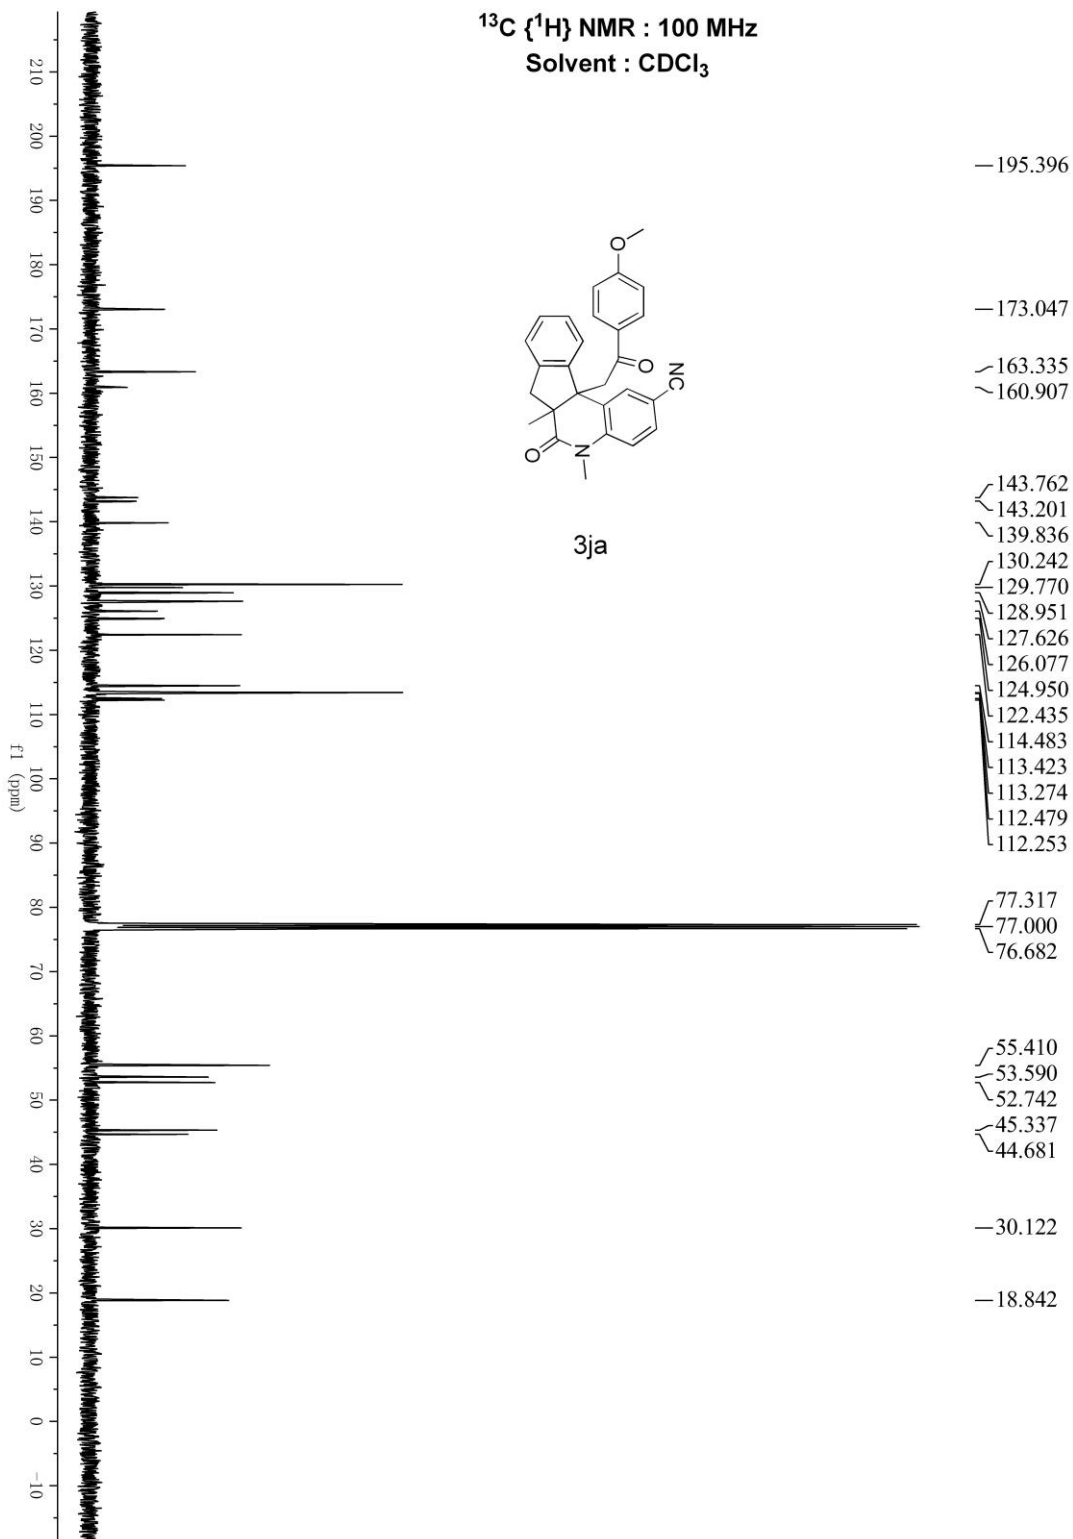

**3-methoxy-11b-(2-(4-methoxyphenyl)-2-oxoethyl)-5,6a-dimethyl-5,6a,7,11b-tetrahydro-6H-indeno[2,1-c]quinolin-6-one (3ka)**

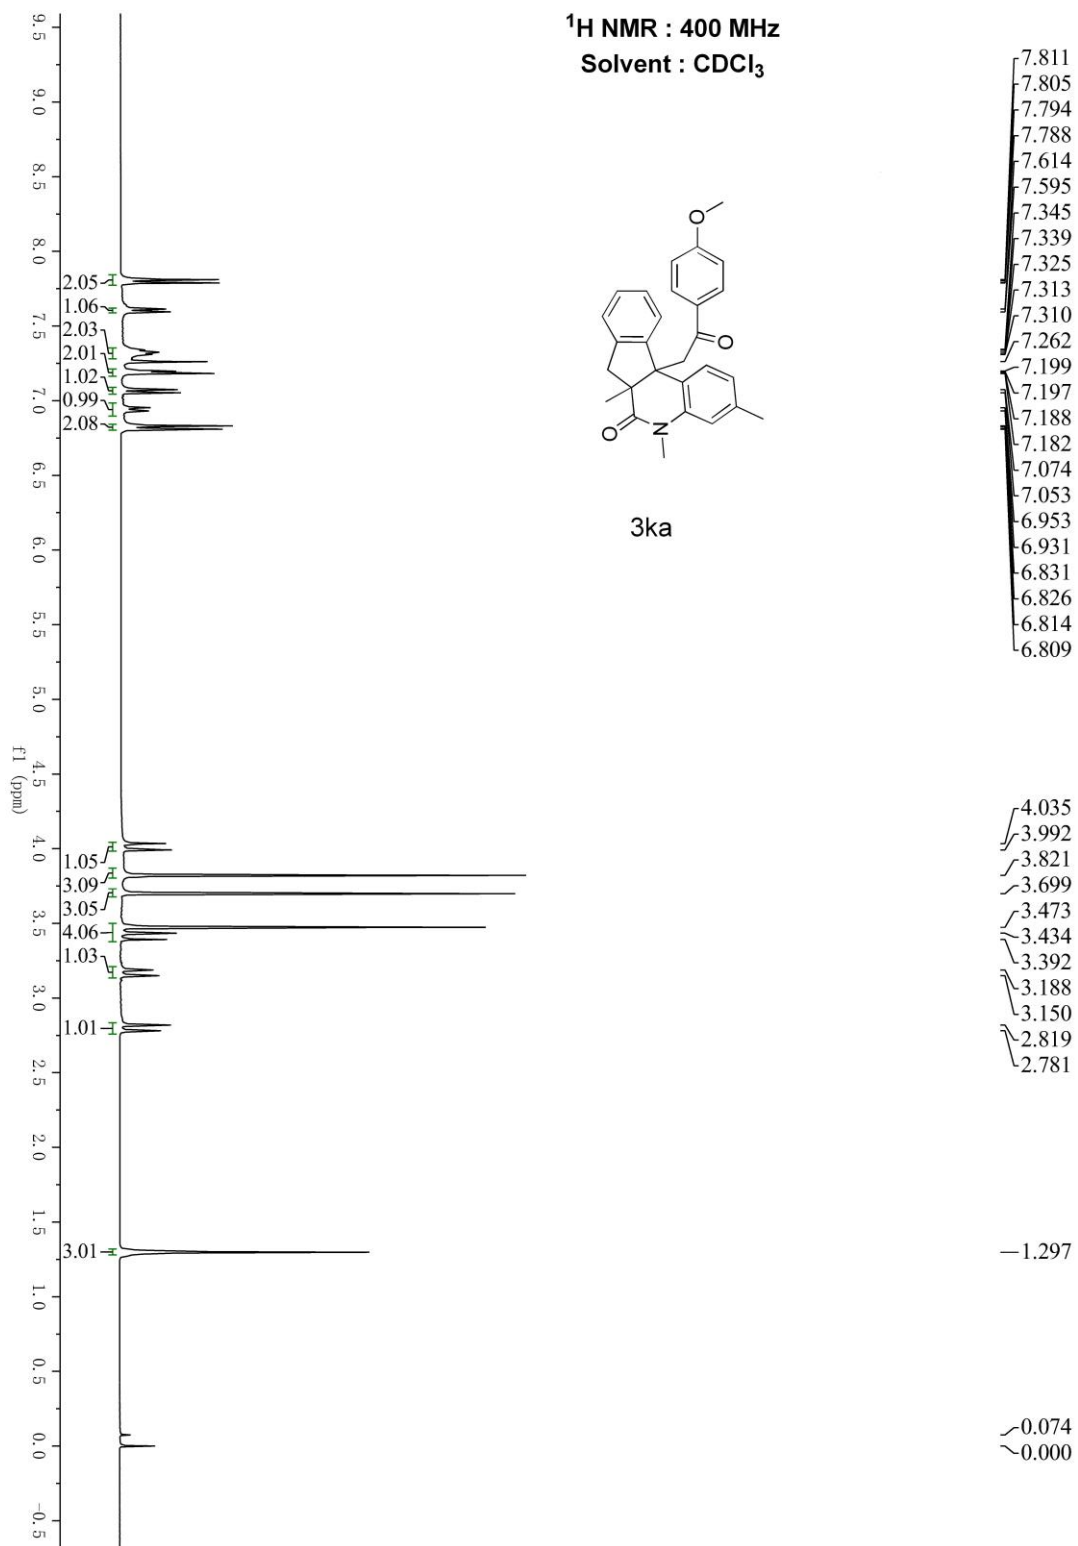

$^{13}\text{C}$   $\{^1\text{H}\}$  NMR : 100 MHz  
Solvent :  $\text{CDCl}_3$

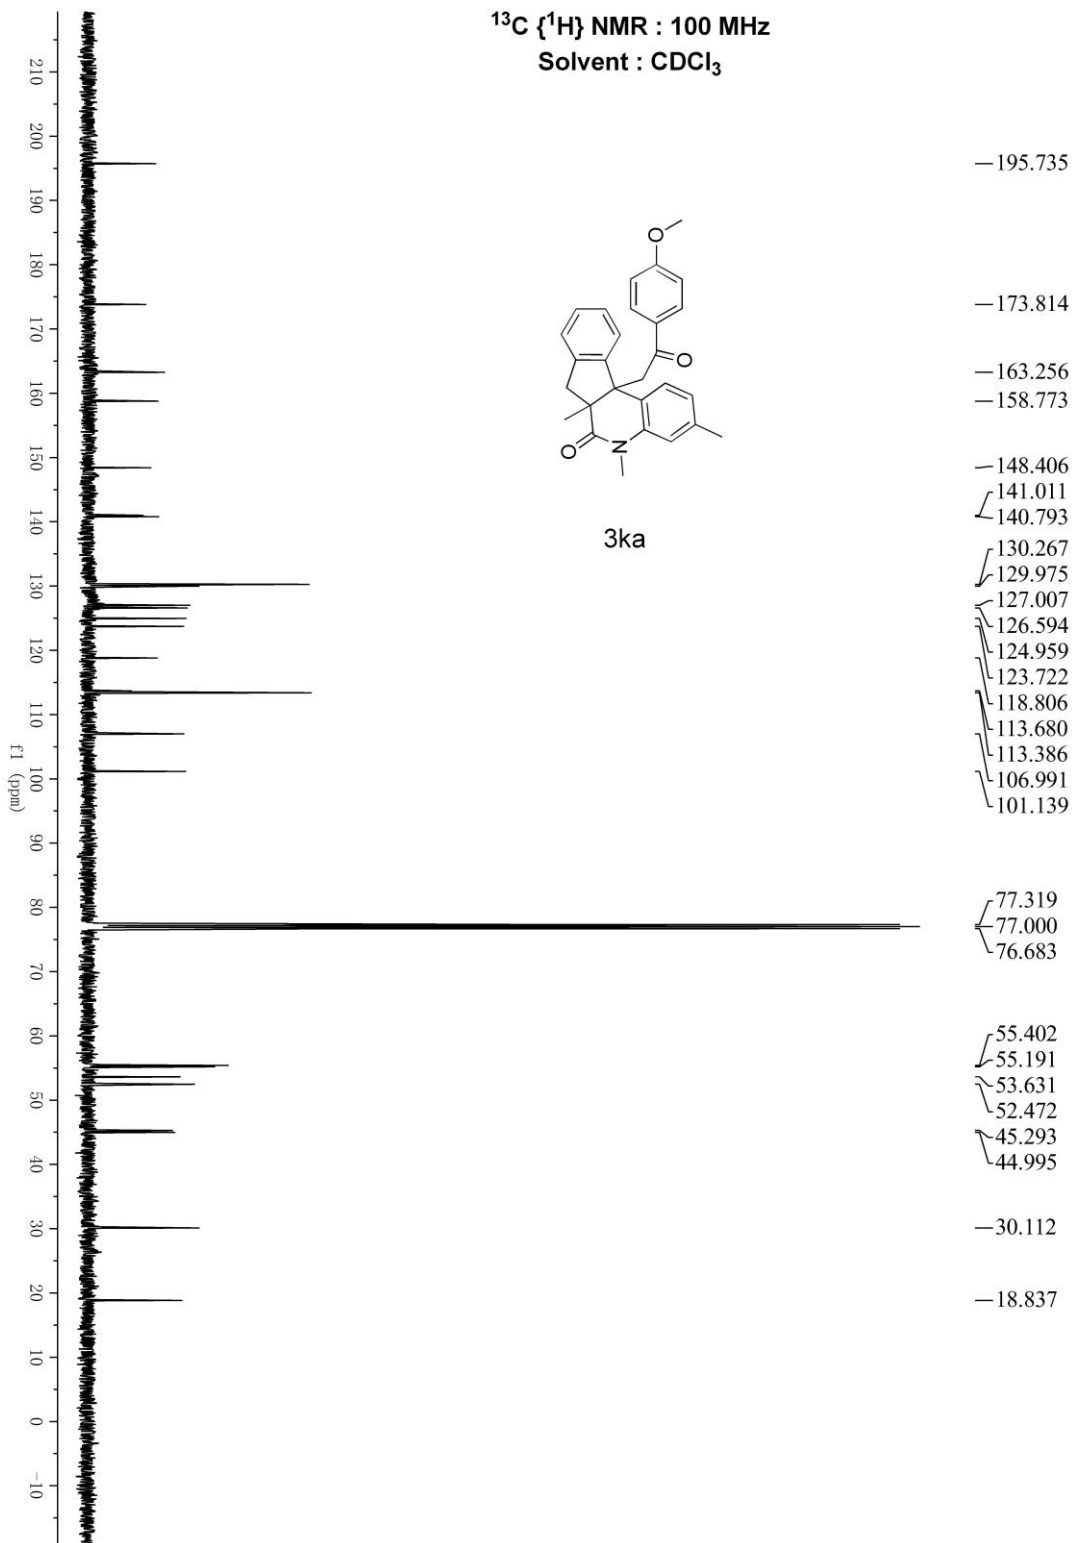

**11b-(2-(4-methoxyphenyl)-2-oxoethyl)-5,6a,9-trimethyl-5,6a,7,11b-tetrahydro-6H-indeno[2,1-c]quinolin-6-one (3la)**

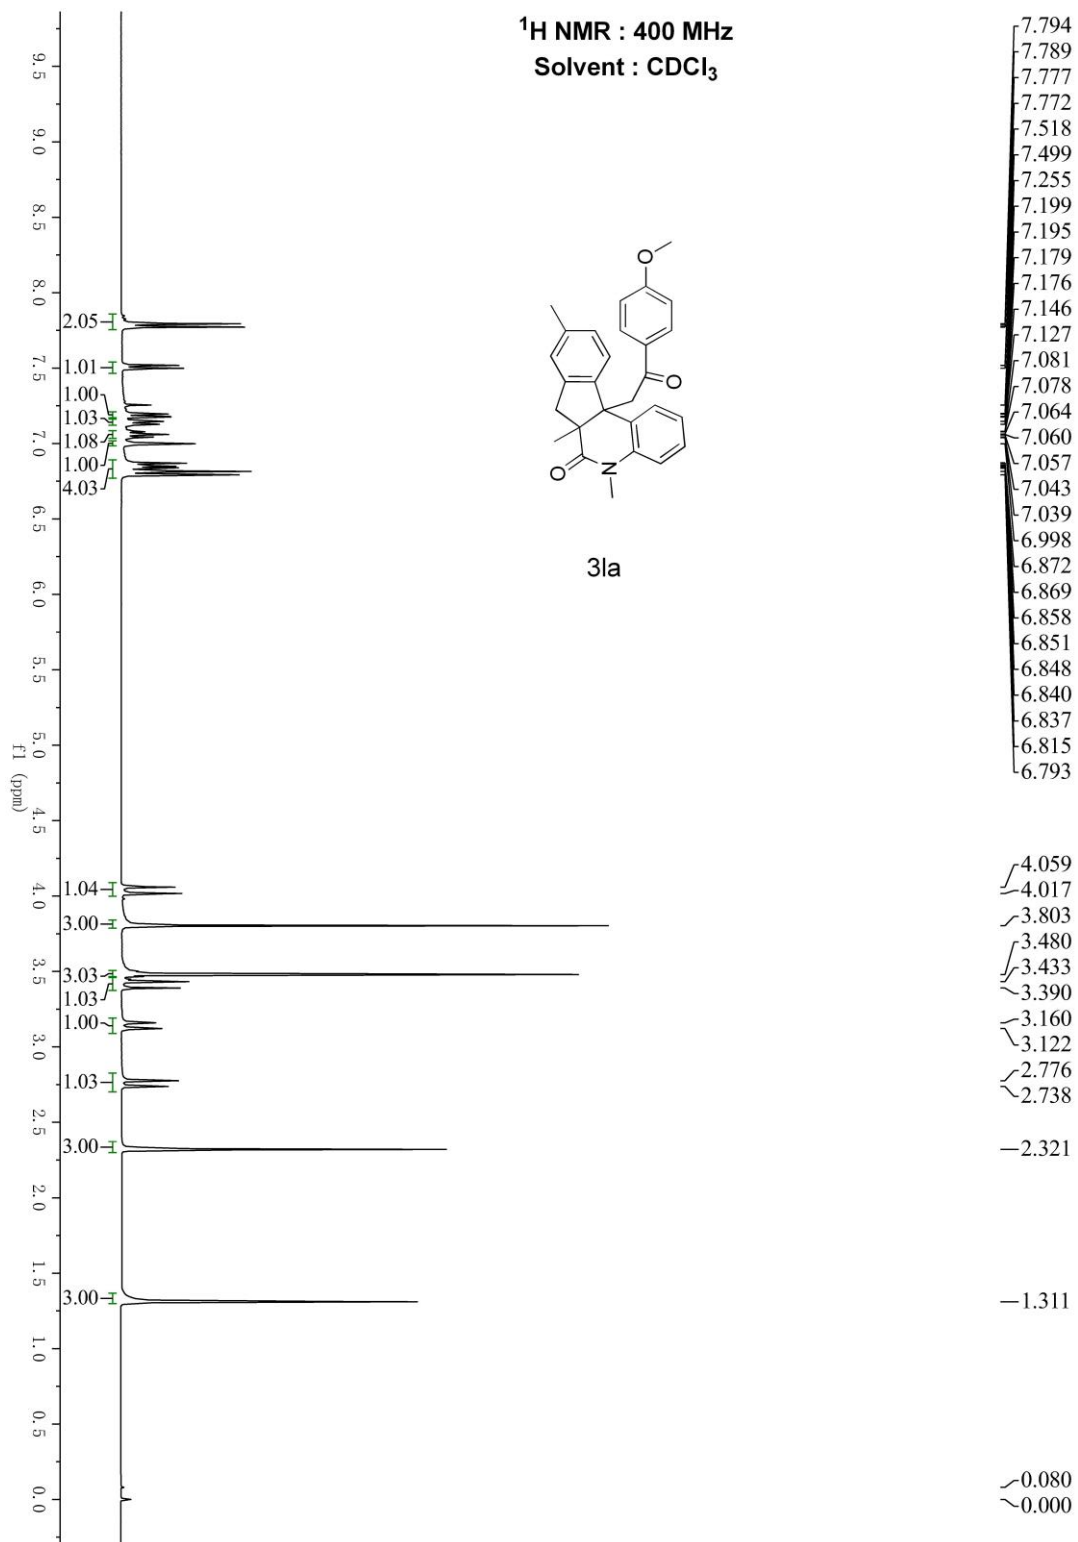

$^{13}\text{C}$   $\{^1\text{H}\}$  NMR : 100 MHz  
Solvent :  $\text{CDCl}_3$

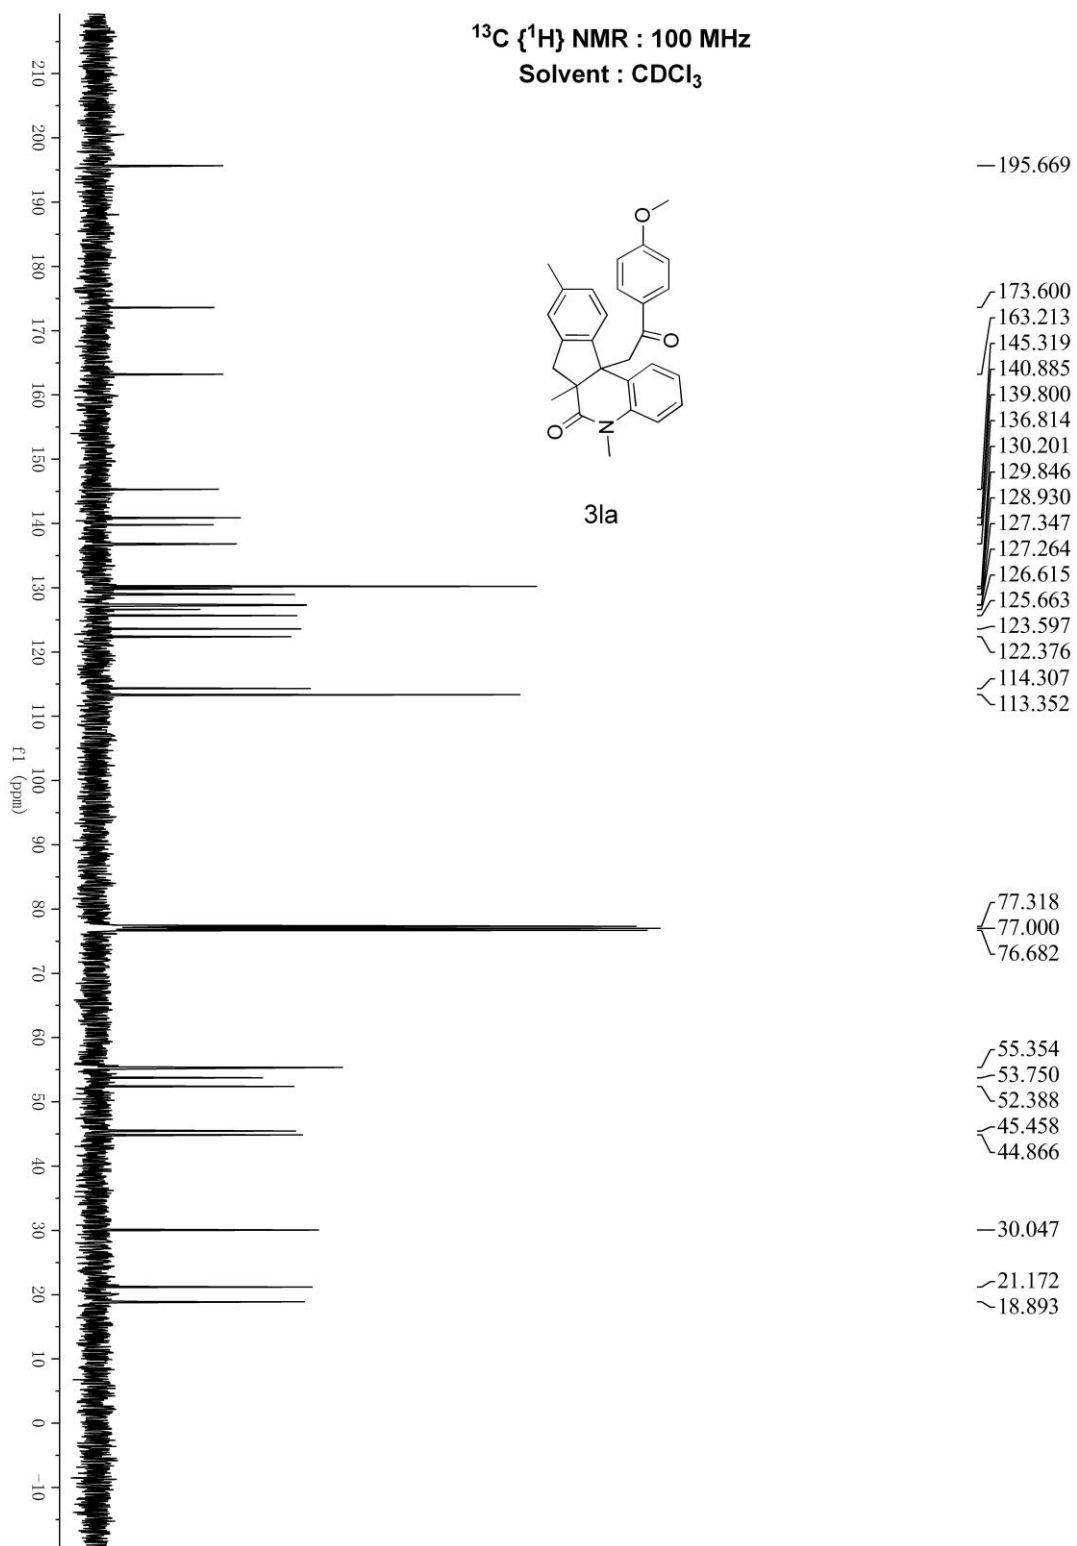

**9-fluoro-11b-(2-(4-methoxyphenyl)-2-oxoethyl)-5,6a-dimethyl-5,6a,7,11b-tetrahydro-6H-indeno[2,1-c]quinolin-6-one (3ma)**

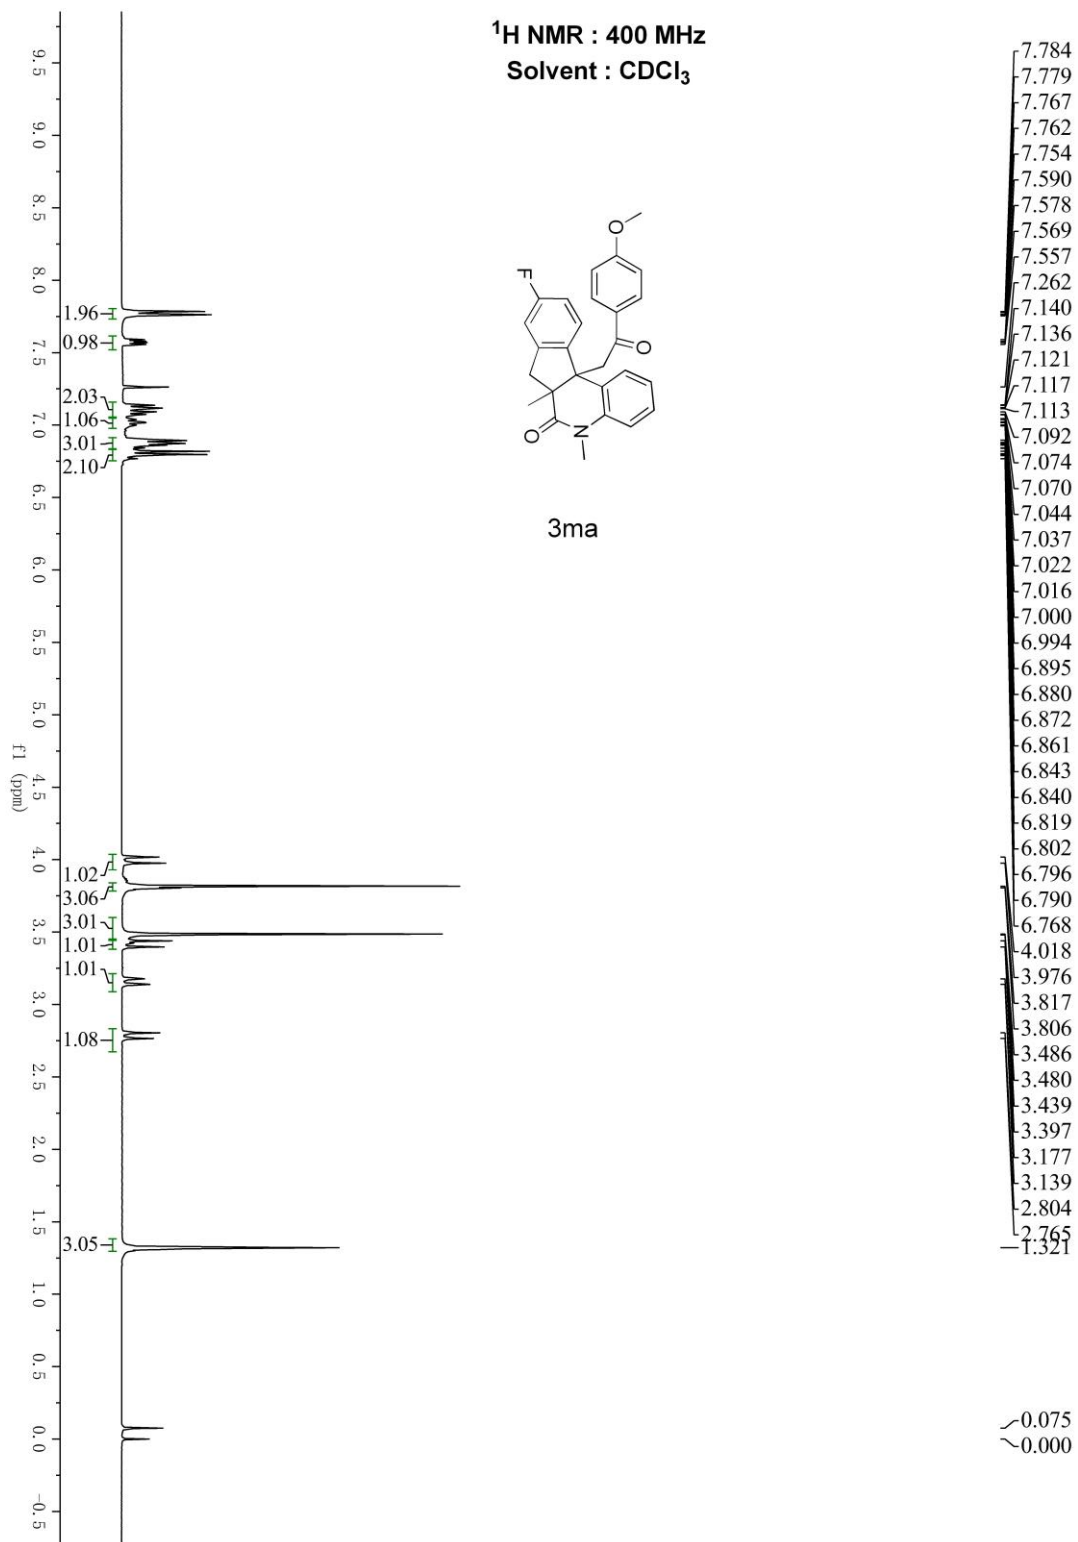

**<sup>19</sup>F NMR : 282 MHz**  
**Solvent : CDCl<sub>3</sub>**

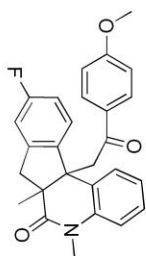

**3ma**

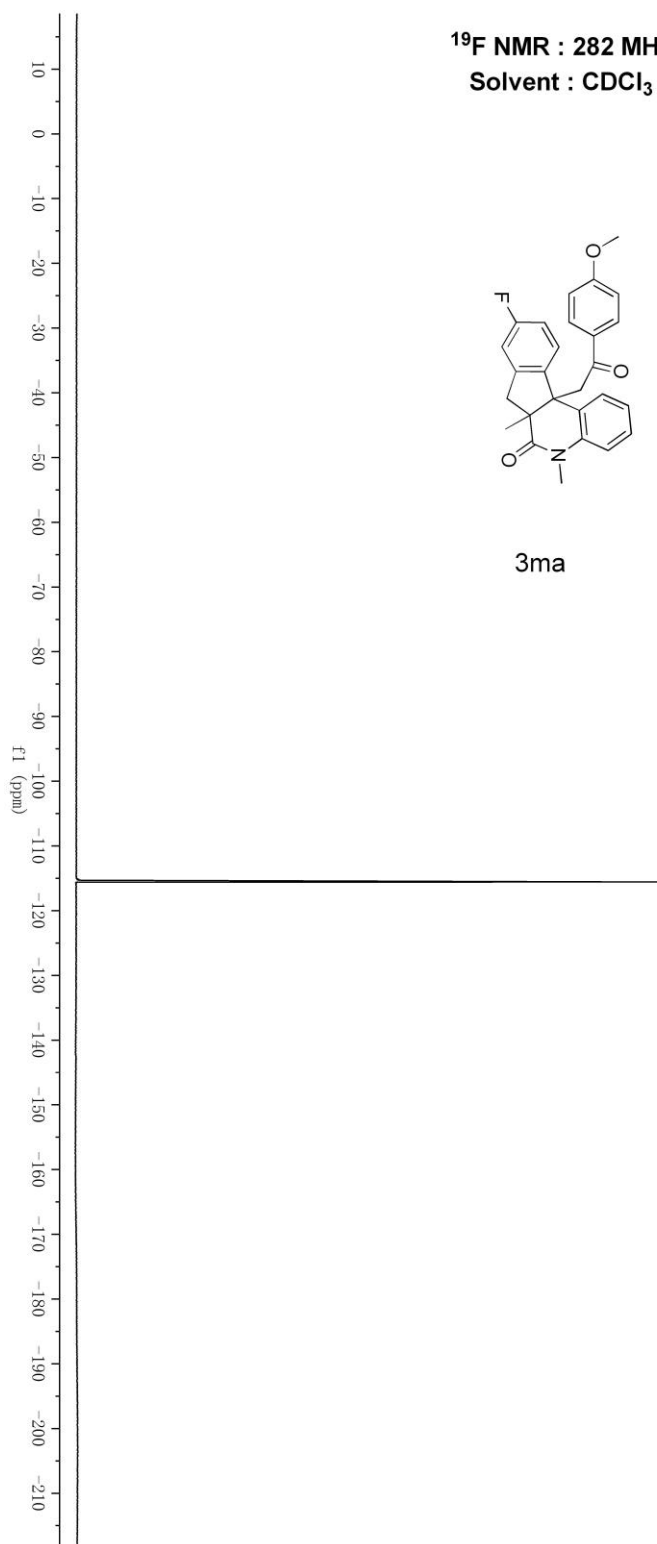

--115.571

$^{13}\text{C}$   $\{^1\text{H}\}$  NMR : 100 MHz  
Solvent :  $\text{CDCl}_3$

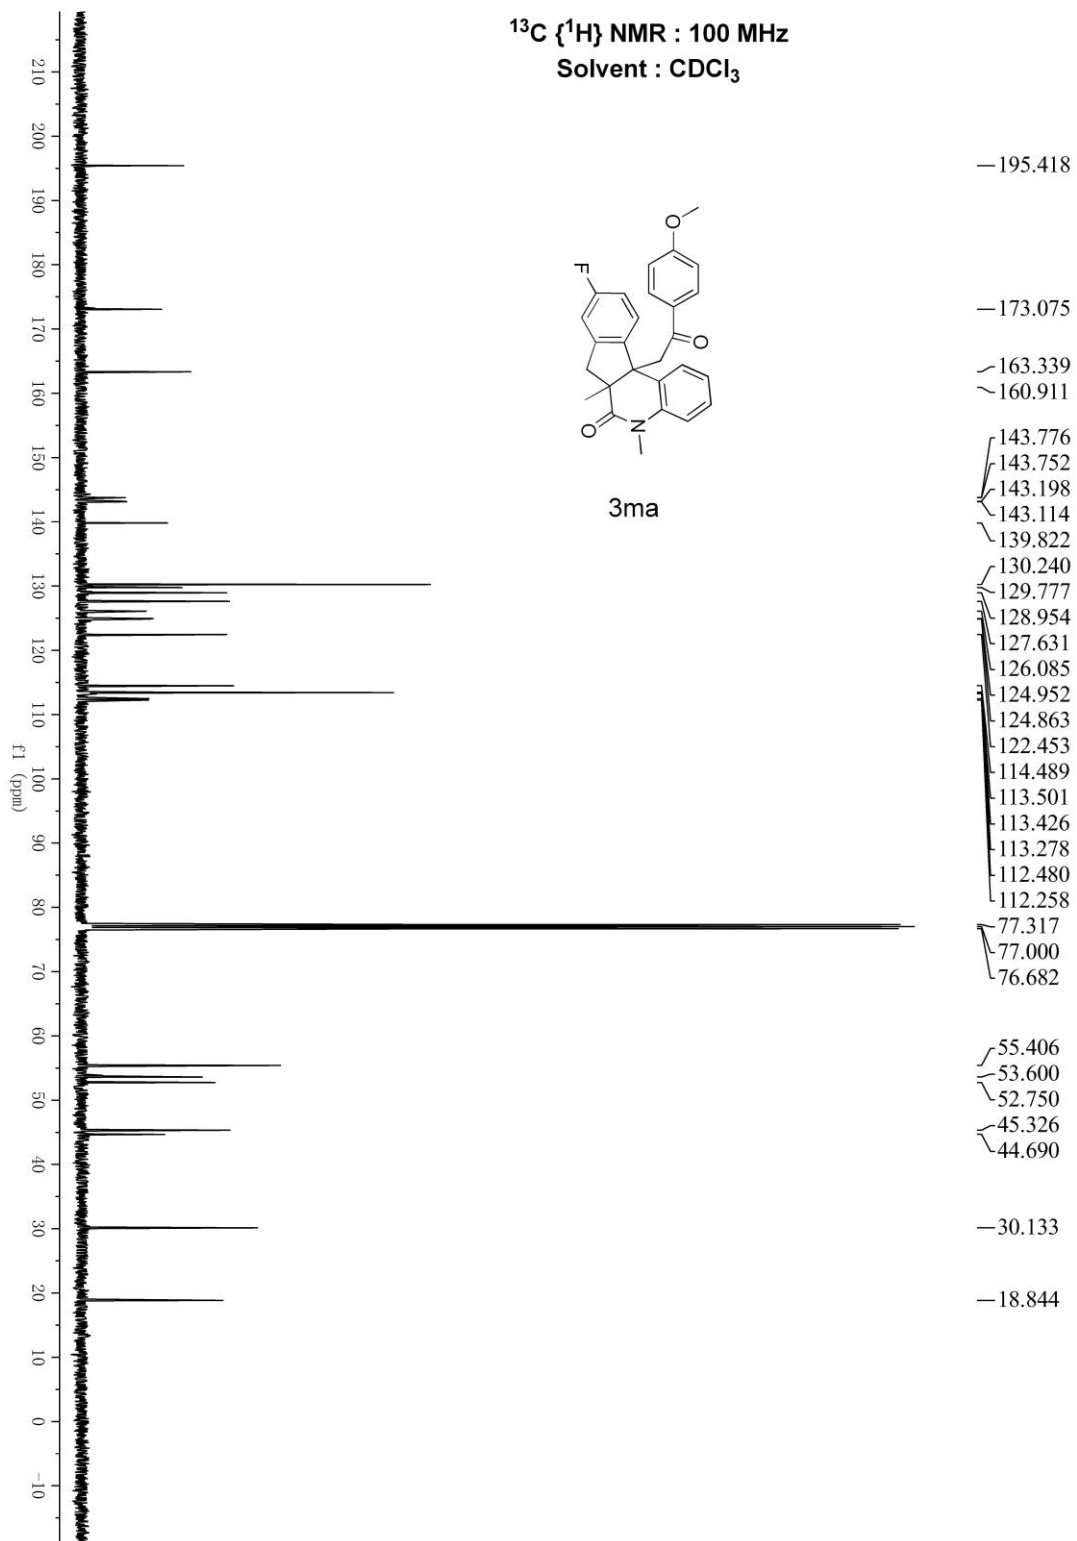



**9-chloro-11b-(2-(4-methoxyphenyl)-2-oxoethyl)-5,6a-dimethyl-5,6a,7,11b-tetrahydro-6H-indeno[2,1-c]quinolin-6-one (3na)**

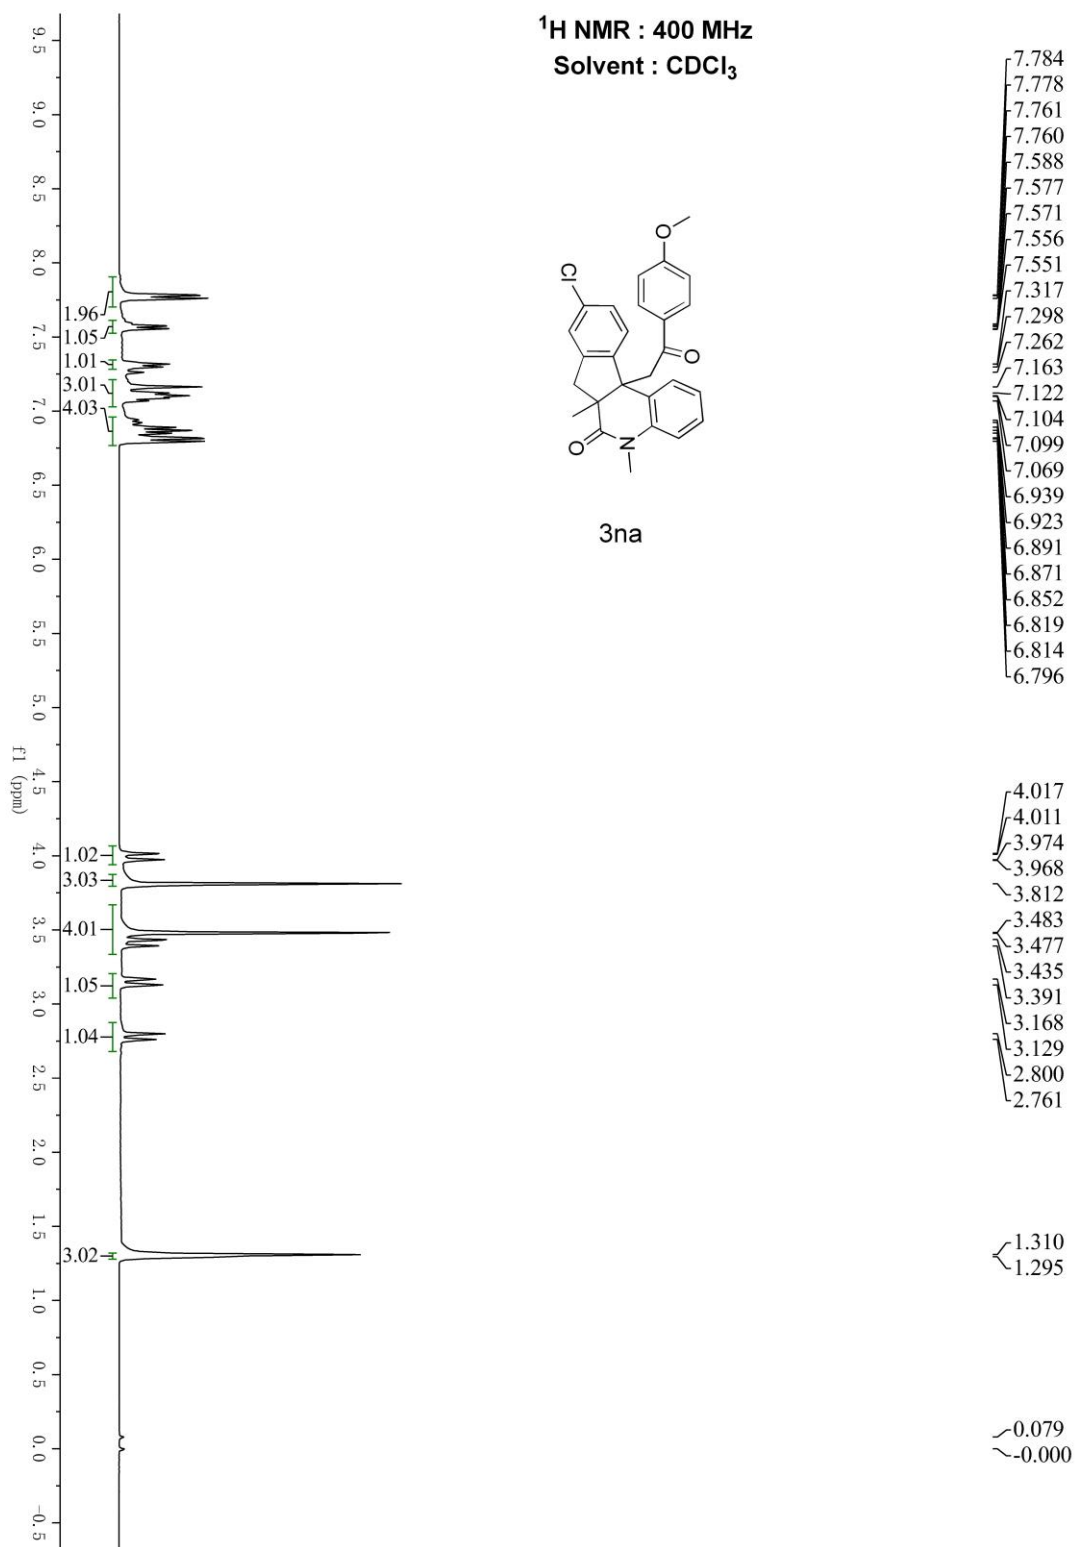

$^{13}\text{C}$   $\{^1\text{H}\}$  NMR : 100 MHz  
Solvent :  $\text{CDCl}_3$

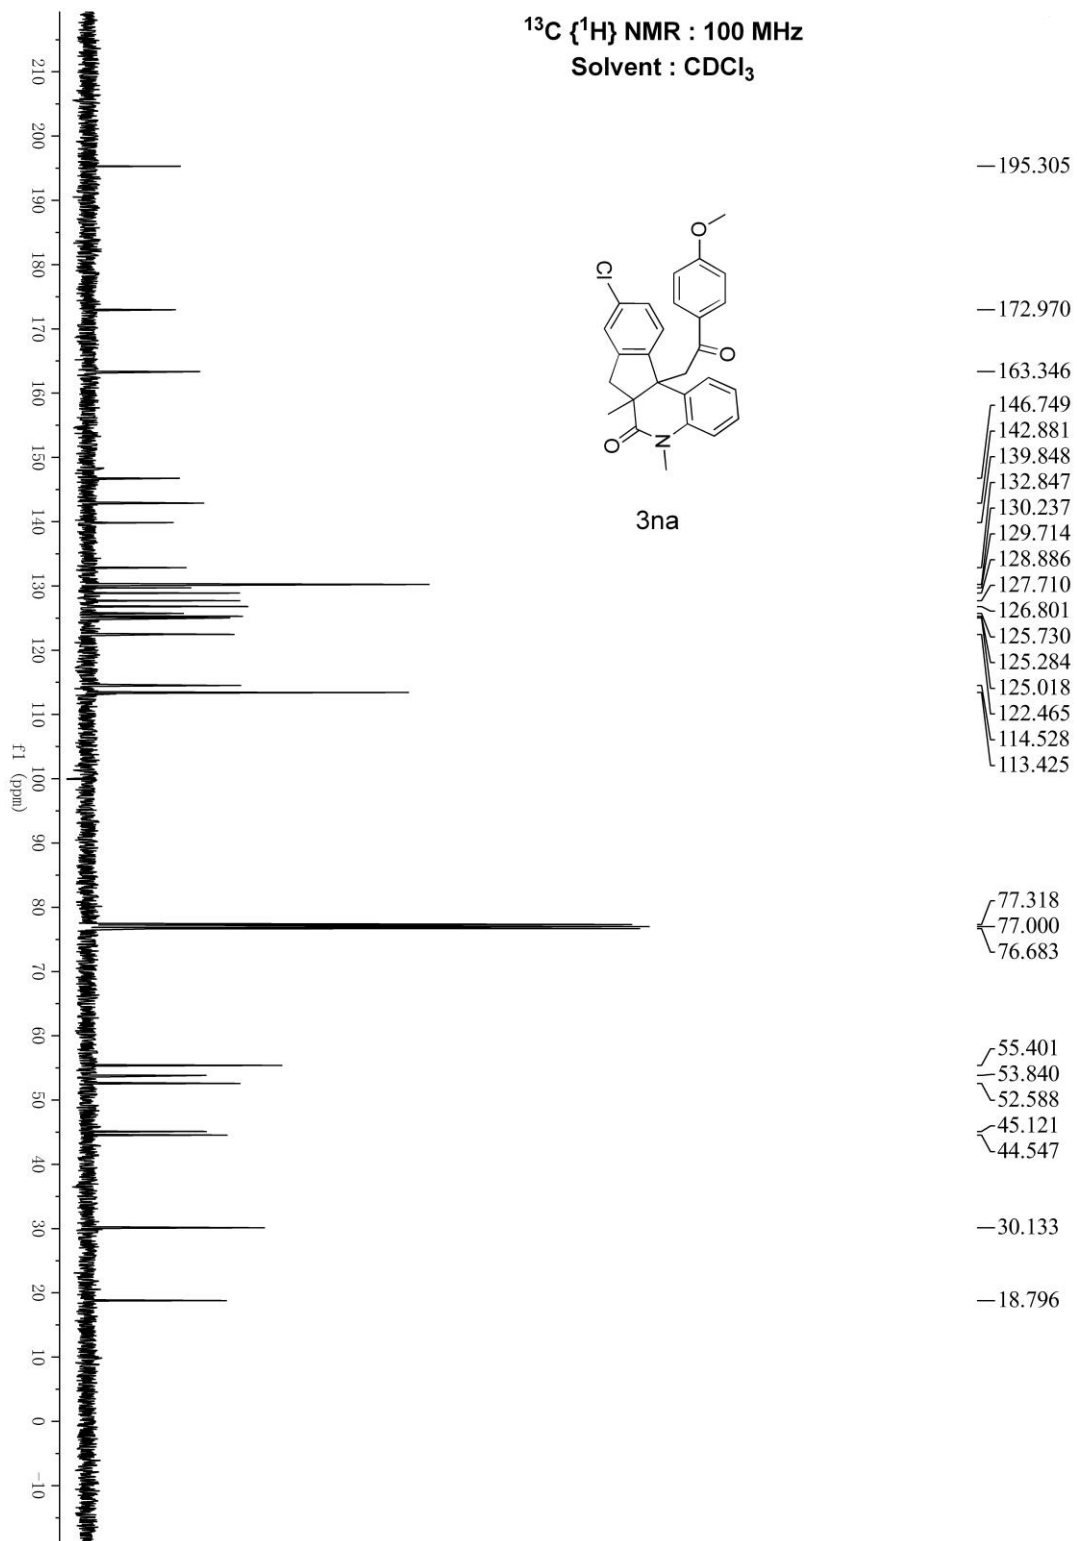

**9-bromo-11b-(2-(4-methoxyphenyl)-2-oxoethyl)-5,6a-dimethyl-5,6a,7,11b-tetrahydro-6H-indeno[2,1-c]quinolin-6-one (30a)**

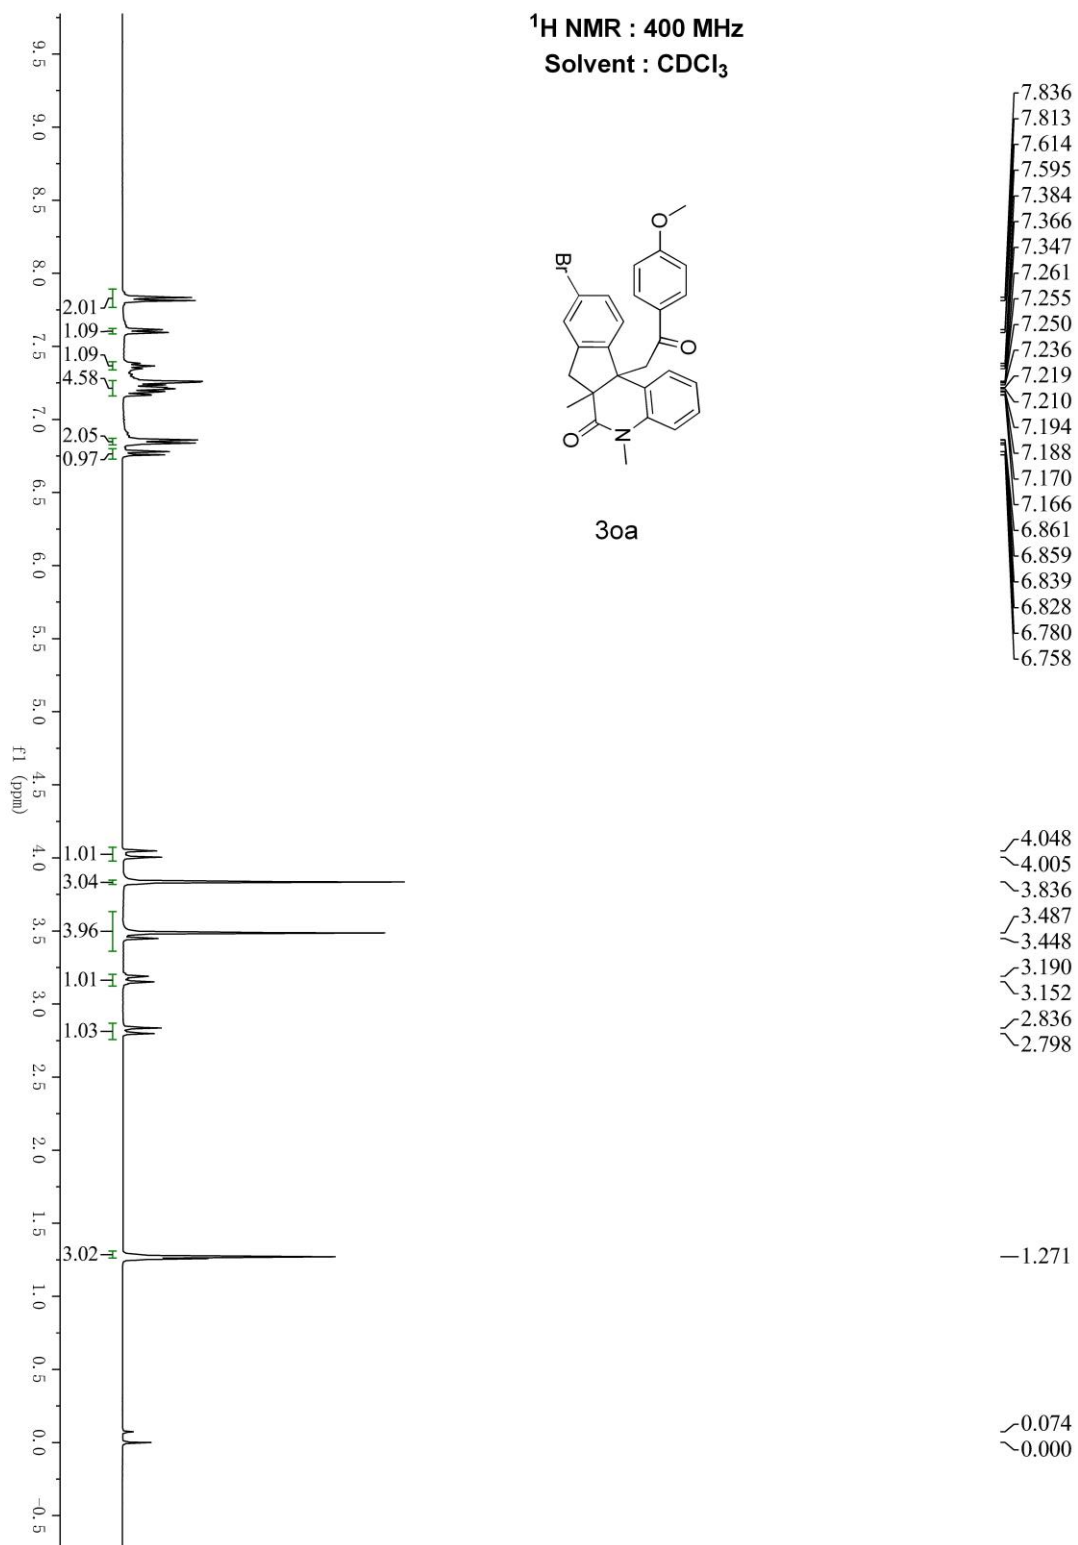

$^{13}\text{C}$   $\{^1\text{H}\}$  NMR : 100 MHz  
Solvent :  $\text{CDCl}_3$

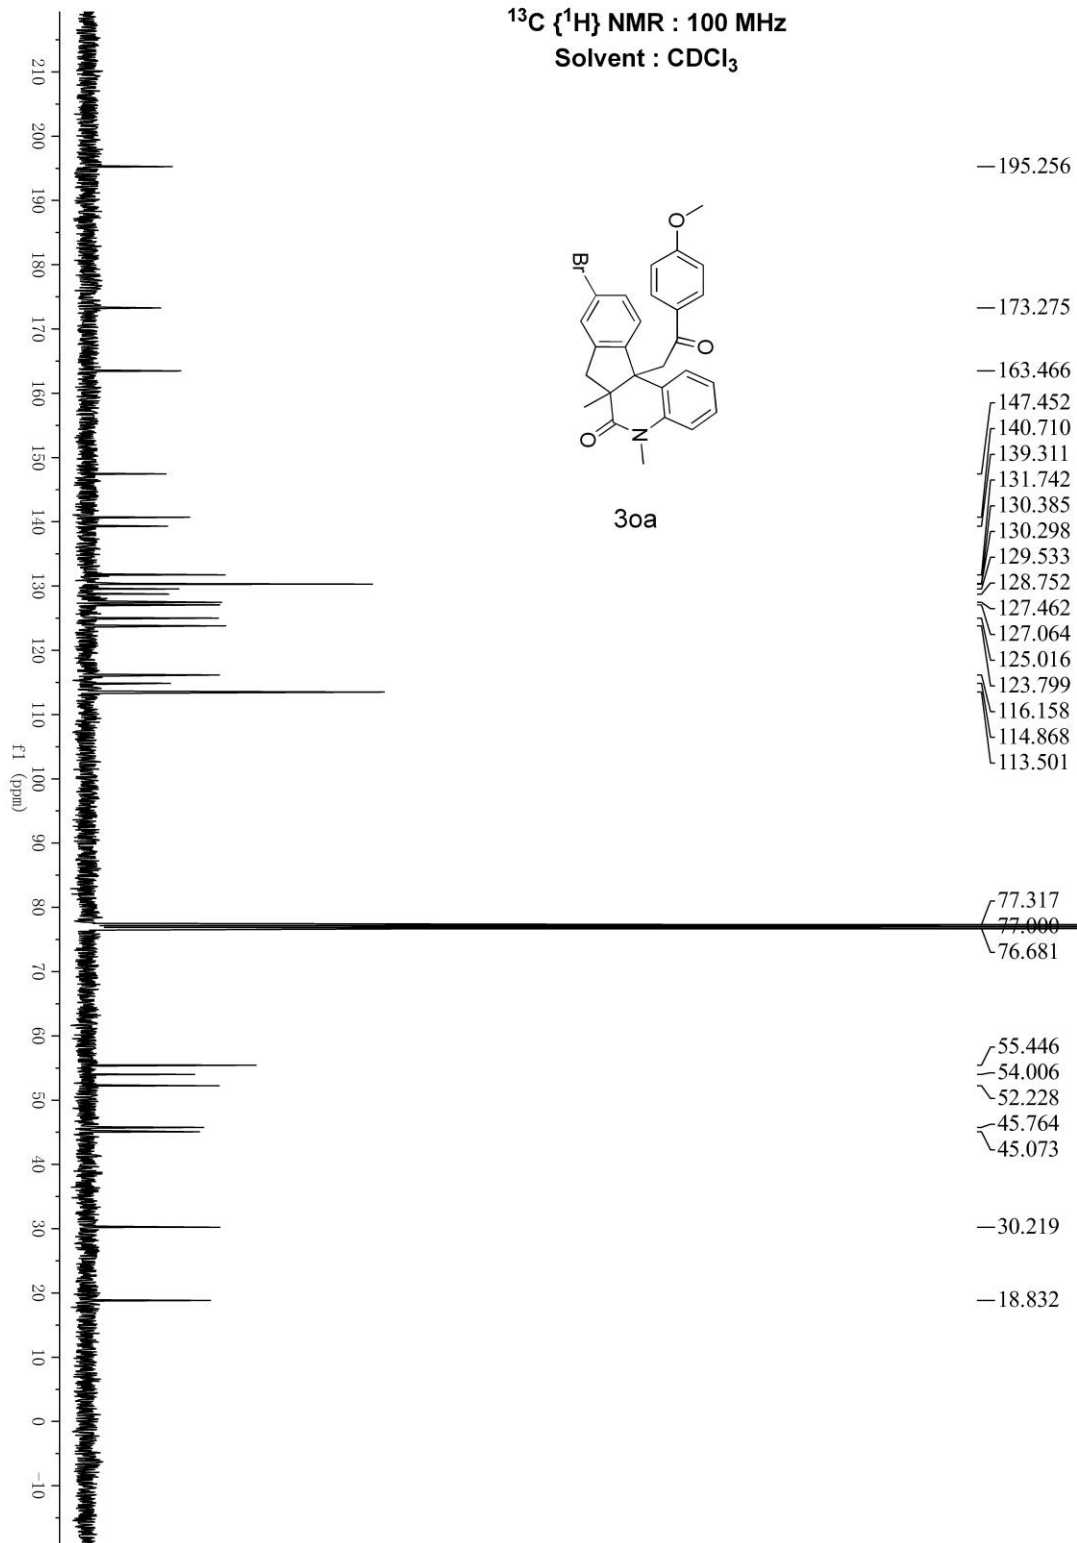

**11b-(2-(4-methoxyphenyl)-2-oxoethyl)-5,6a,10-trimethyl-5,6a,7,11b-tetrahydro-6H-indeno[2,1-c]quinolin-6-one (3pa) and  
11b-(2-(4-methoxyphenyl)-2-oxoethyl)-5,6a,8-trimethyl-5,6a,7,11b-tetrahydro-6H-indeno[2,1-c]quinolin-6-one (3pa') mixture**

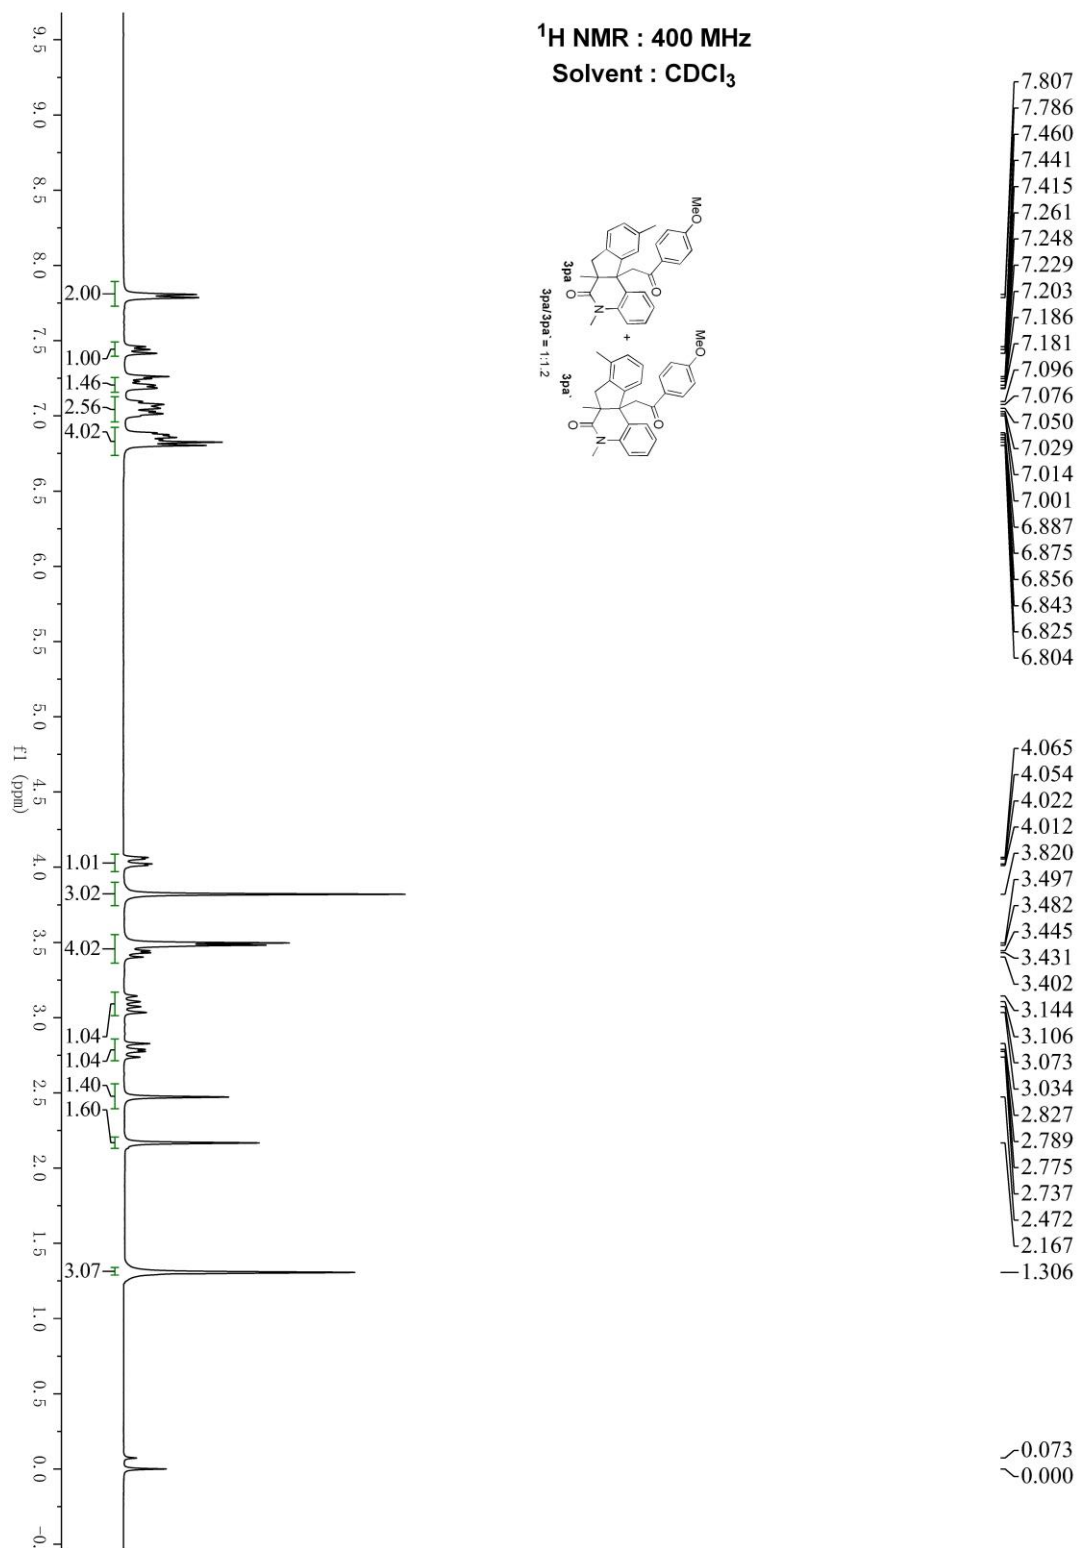

<sup>13</sup>C {<sup>1</sup>H} NMR : 100 MHz  
Solvent : CDCl<sub>3</sub>

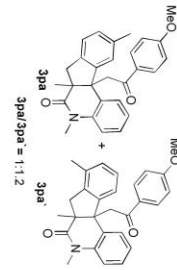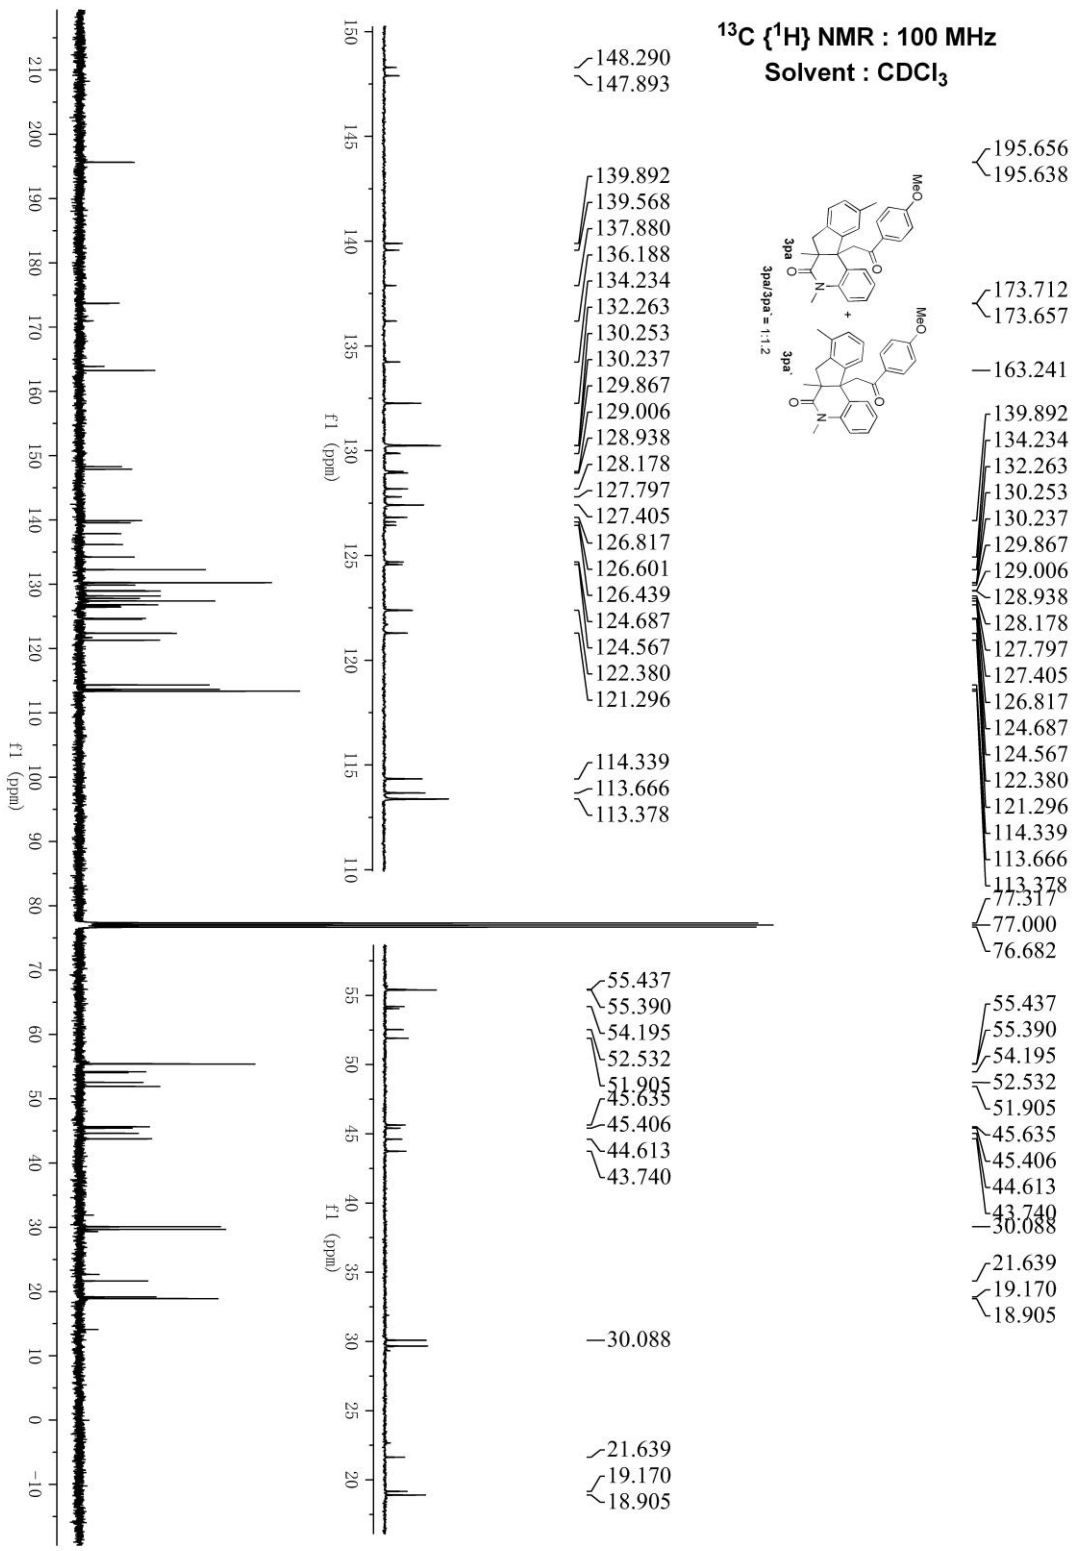

**5-benzyl-11b-(2-(4-methoxyphenyl)-2-oxoethyl)-6a-methyl-5,6a,7,11b-tetrahydro-6H-indeno[2,1-c]quinolin-6-one (3qa)**

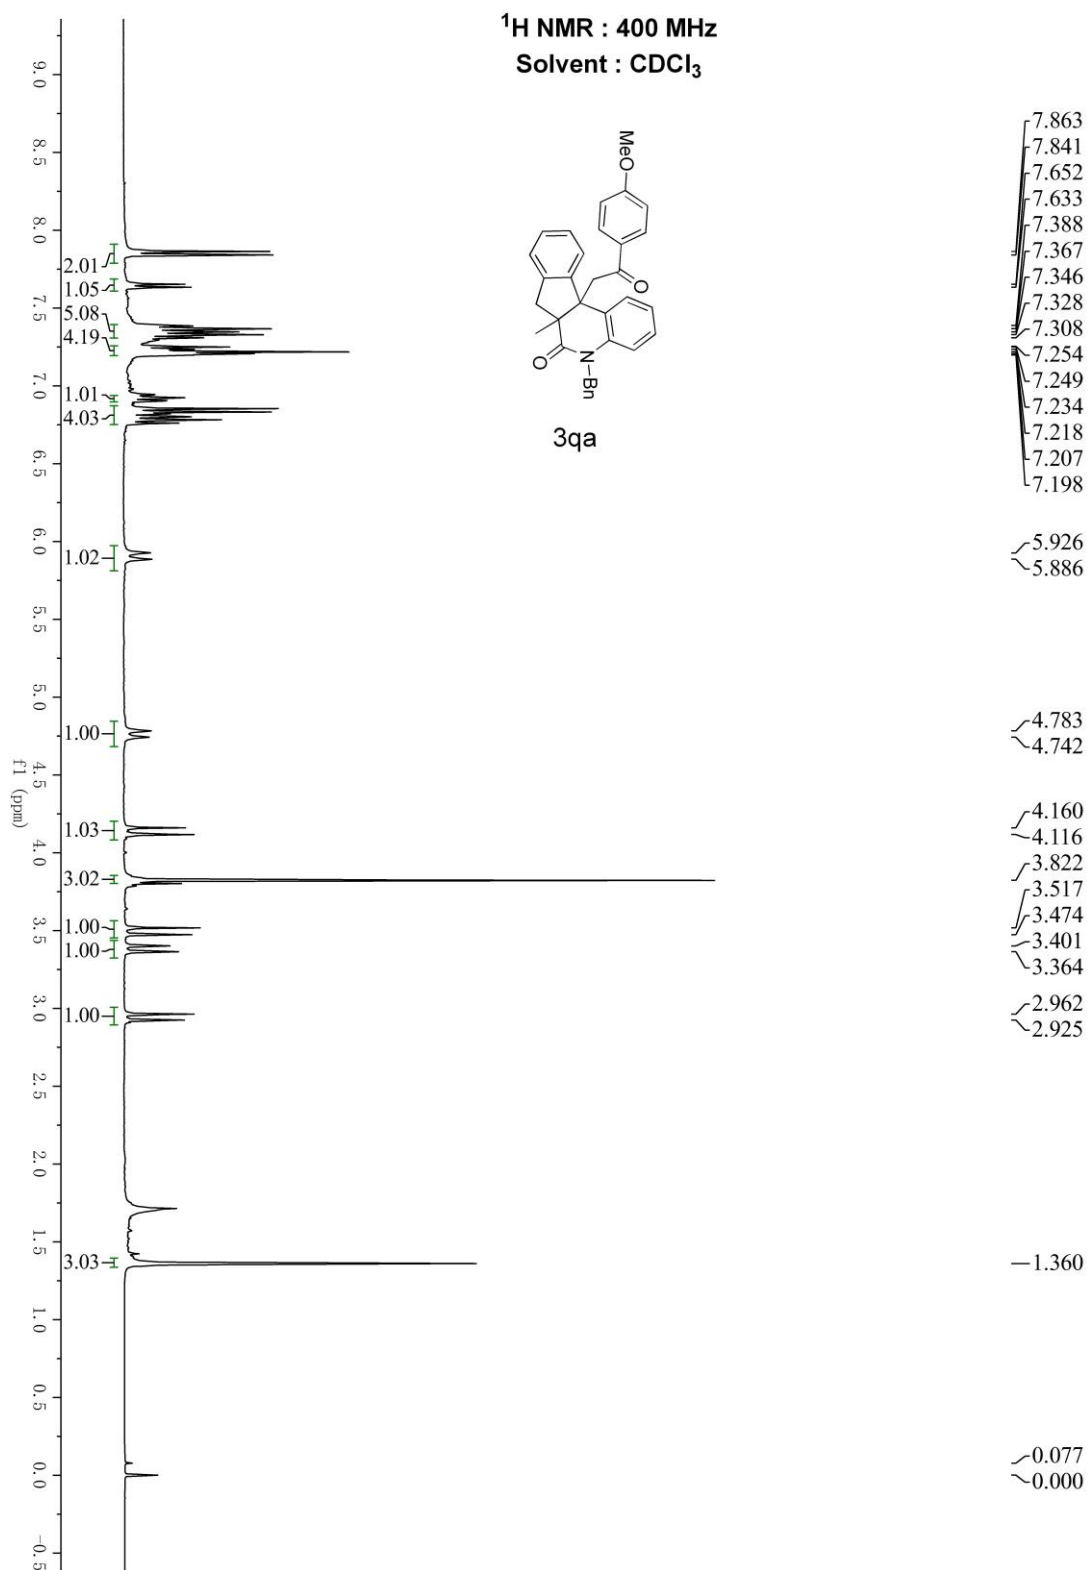

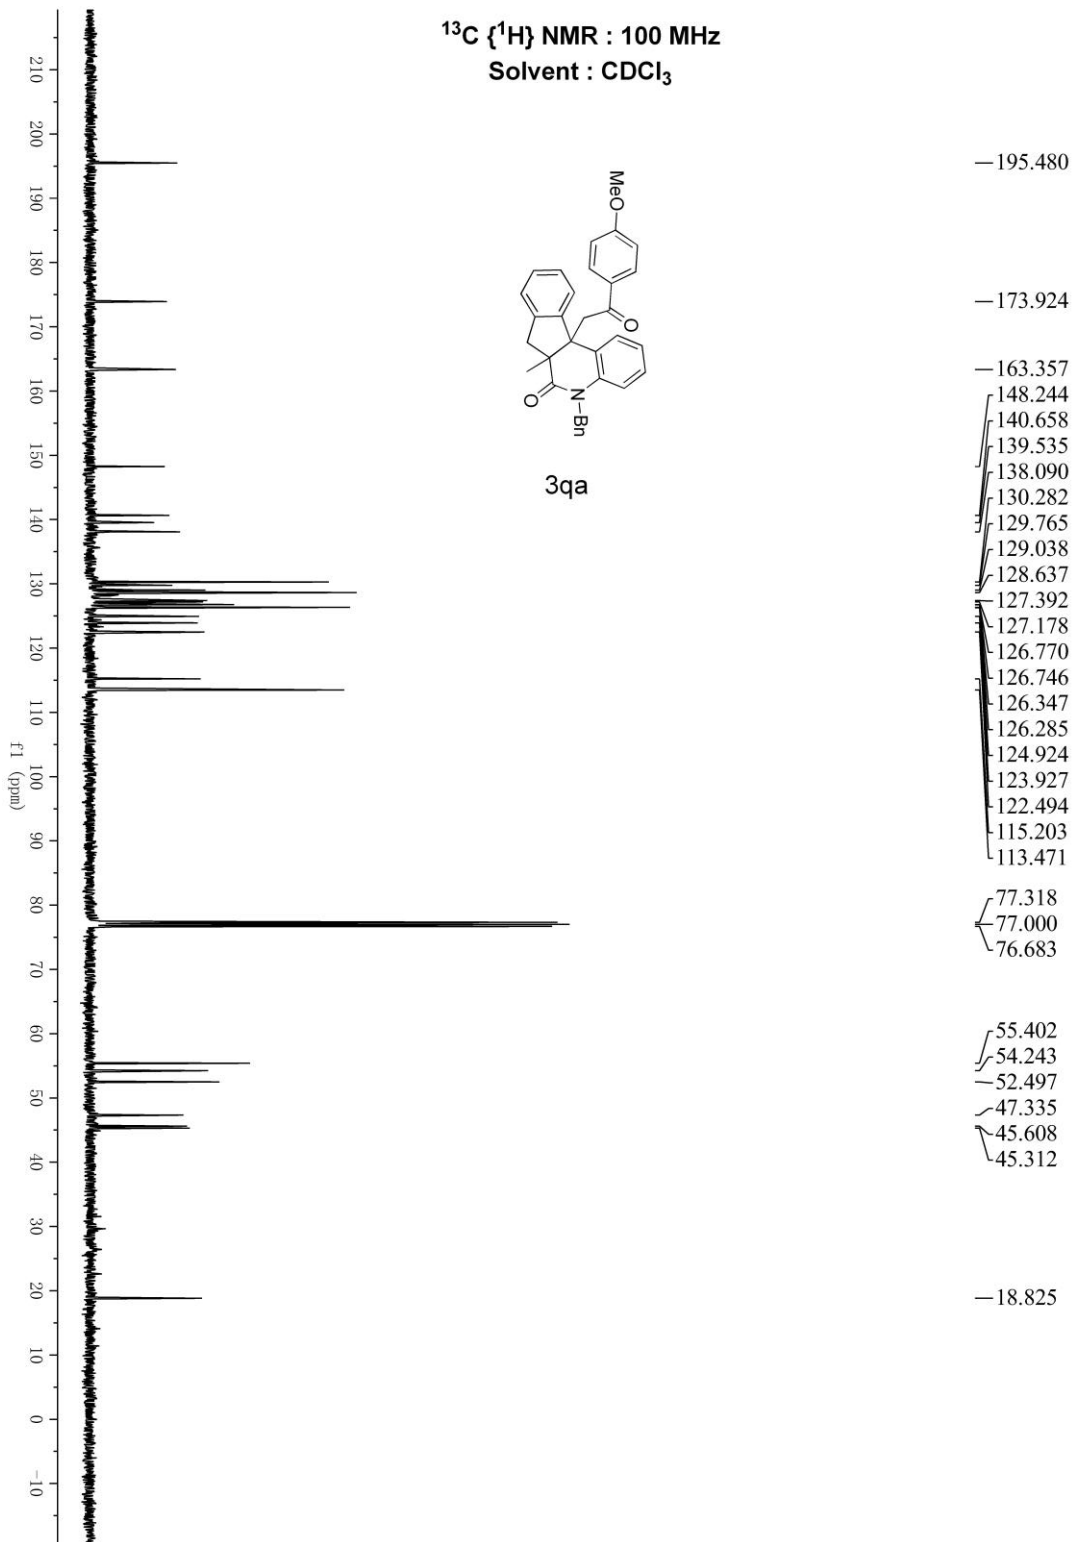



**1,3,4-Trimethyl-3-(2-oxo-2-(p-tolyl)ethyl)-5-phenyl-1,3-dihydro-2H-benzo[b]azepin-2-one (3tb)**

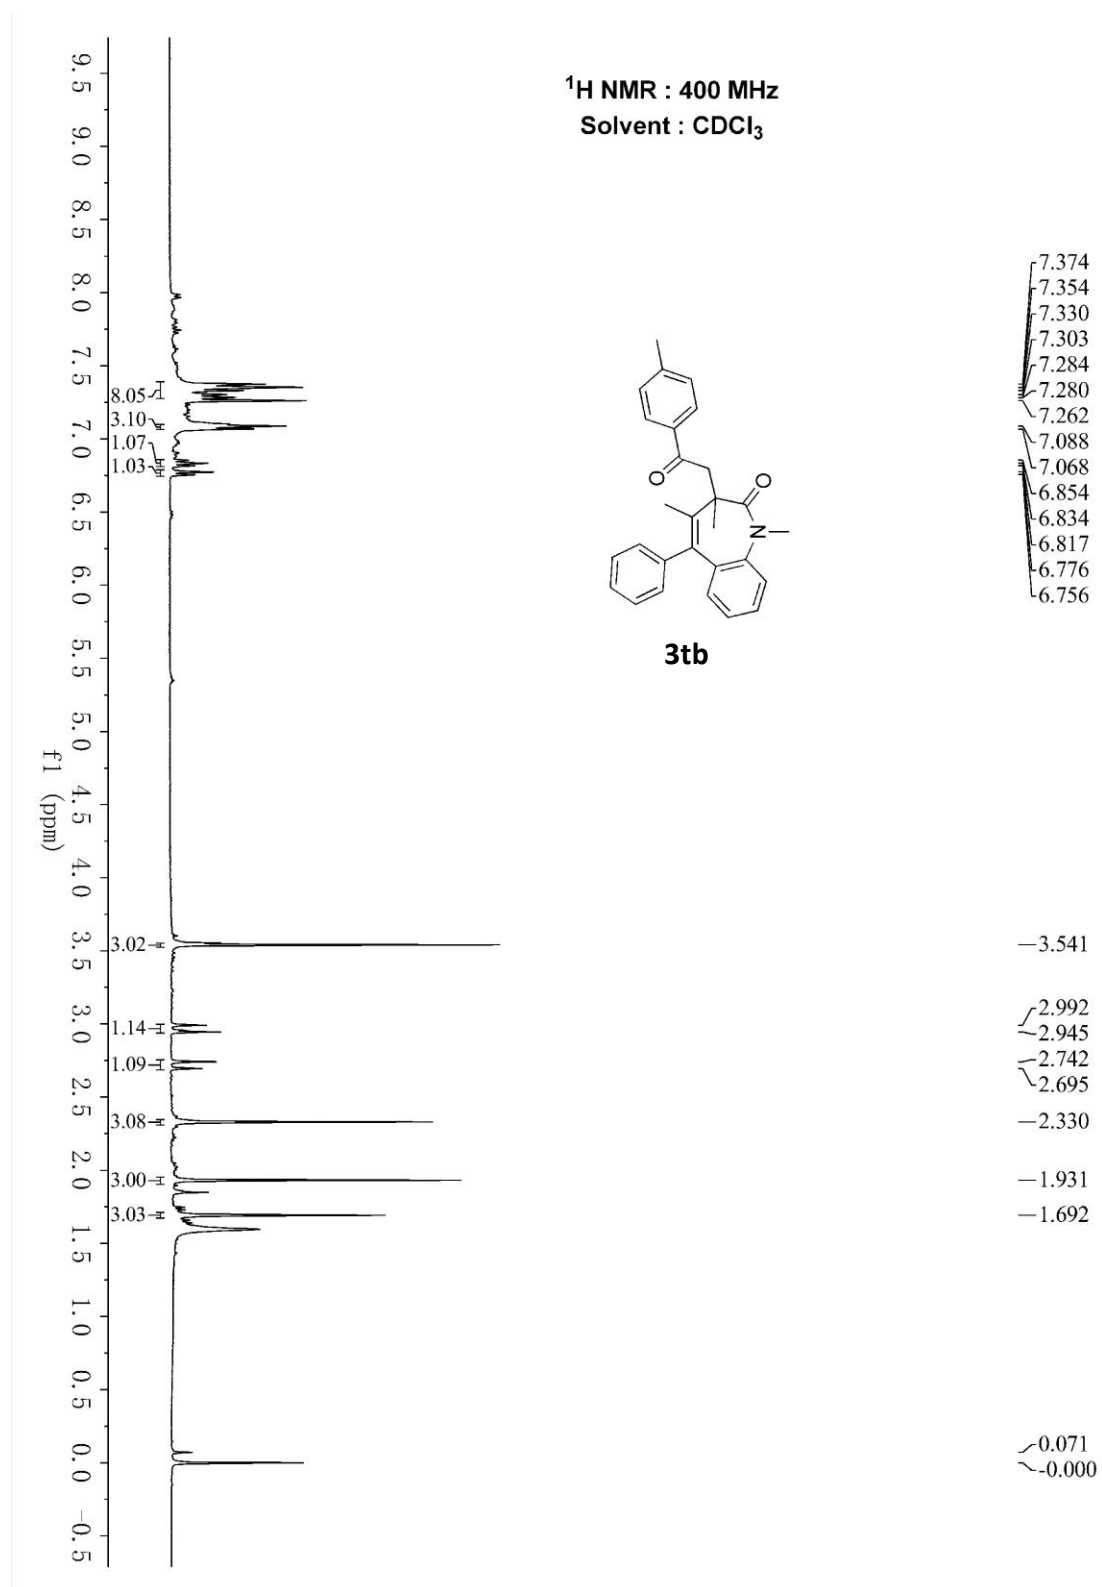

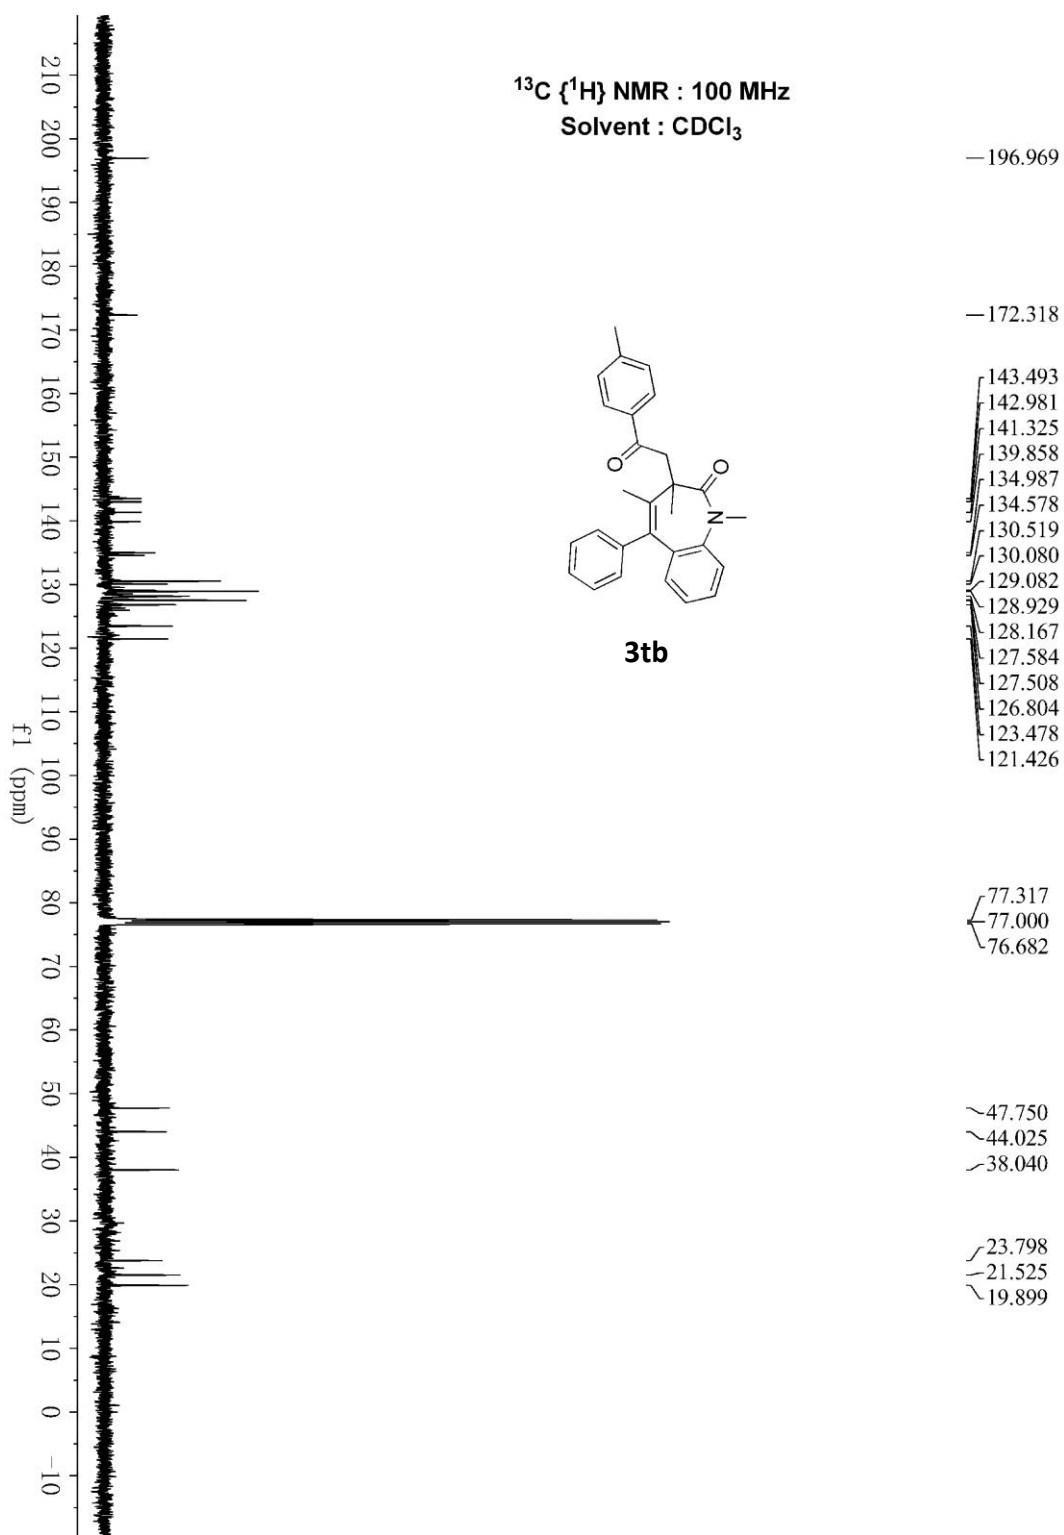

# 2,6-Di-tert-butyl-4-neopentylphenol (7)

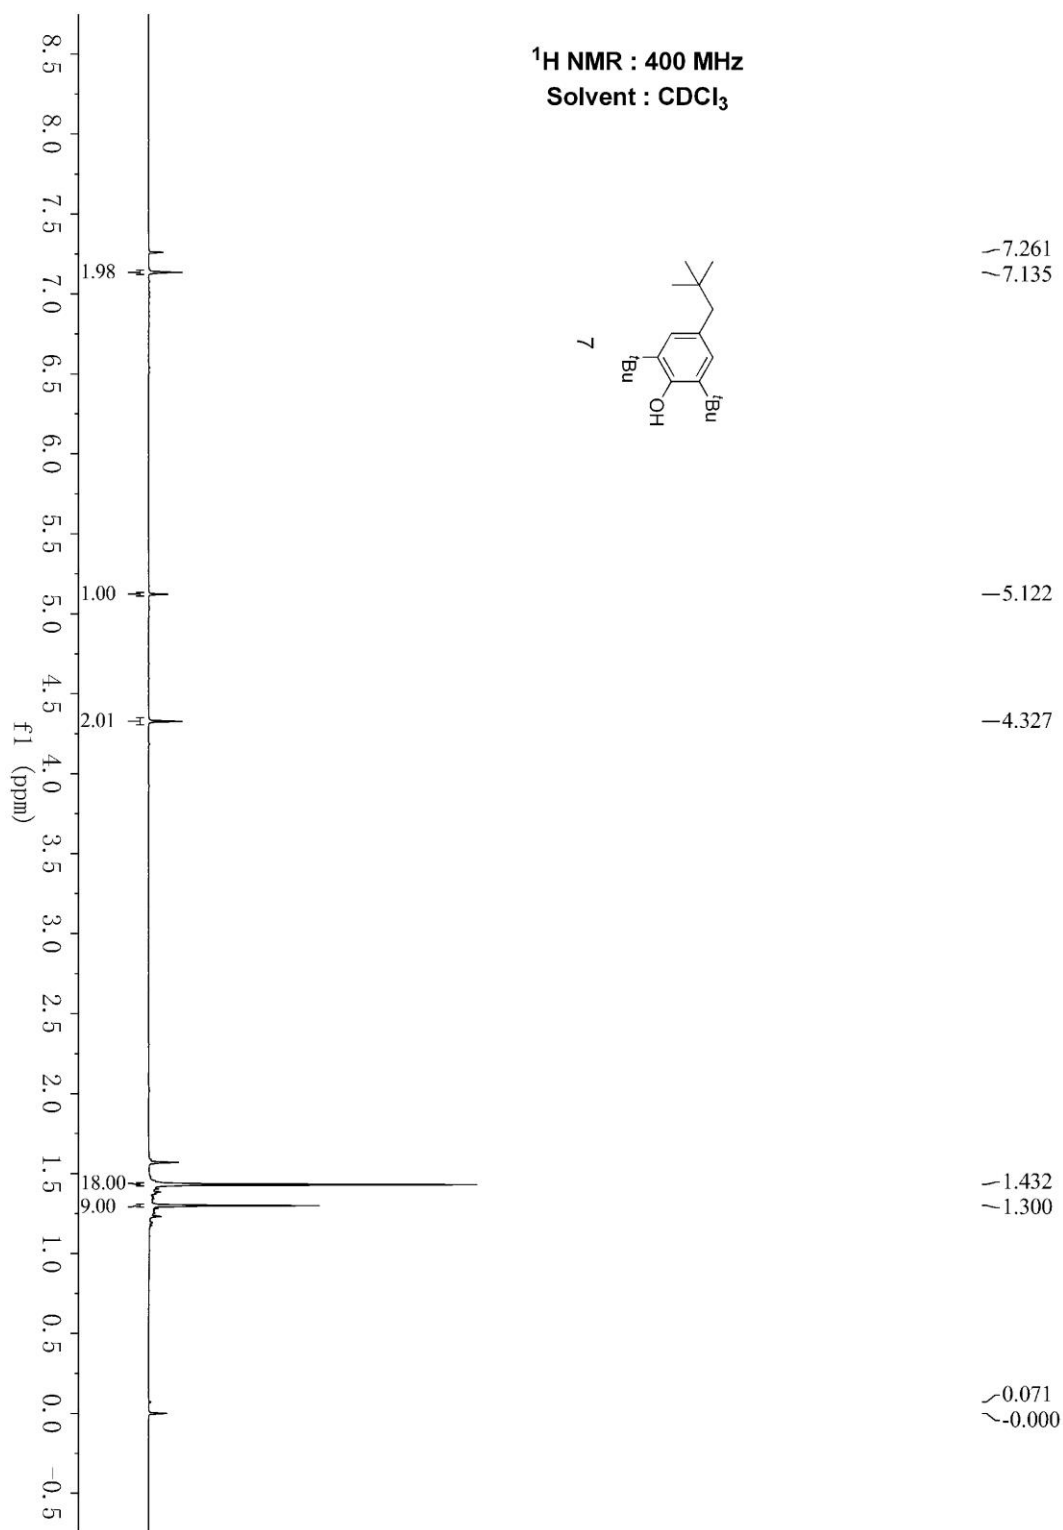

$^{13}\text{C}$   $\{^1\text{H}\}$  NMR : 100 MHz  
Solvent :  $\text{CDCl}_3$

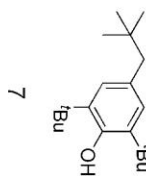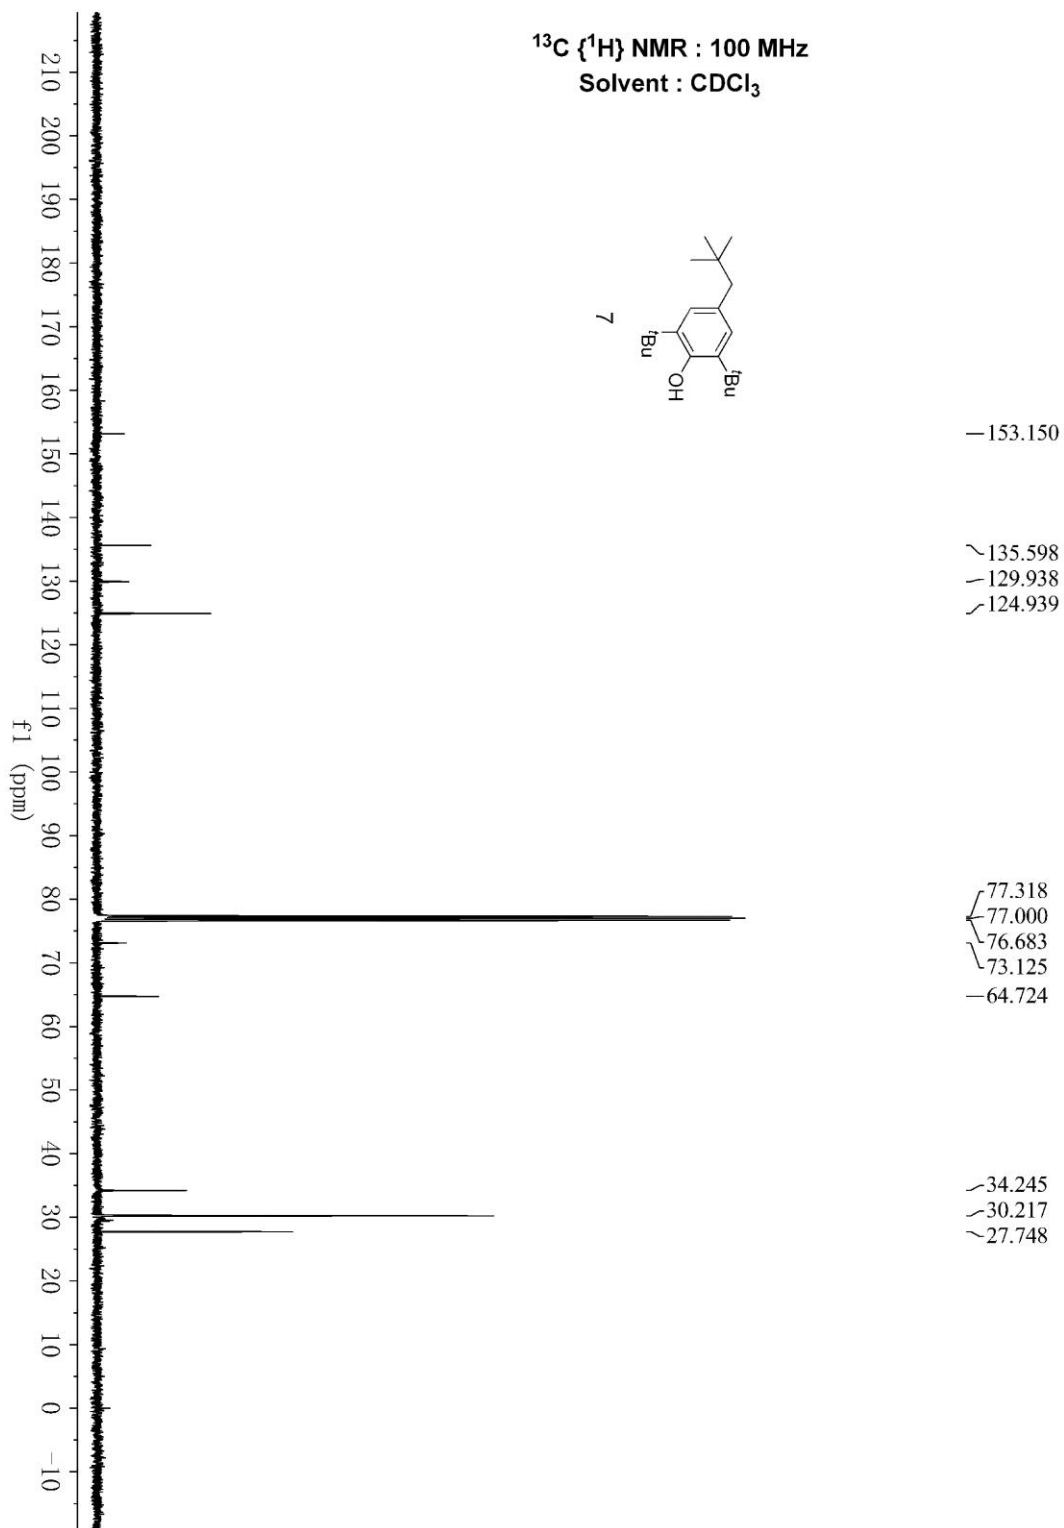

# 2,2,6,6-tetramethylpiperidin-1-yl-4-methoxybenzoate (8)

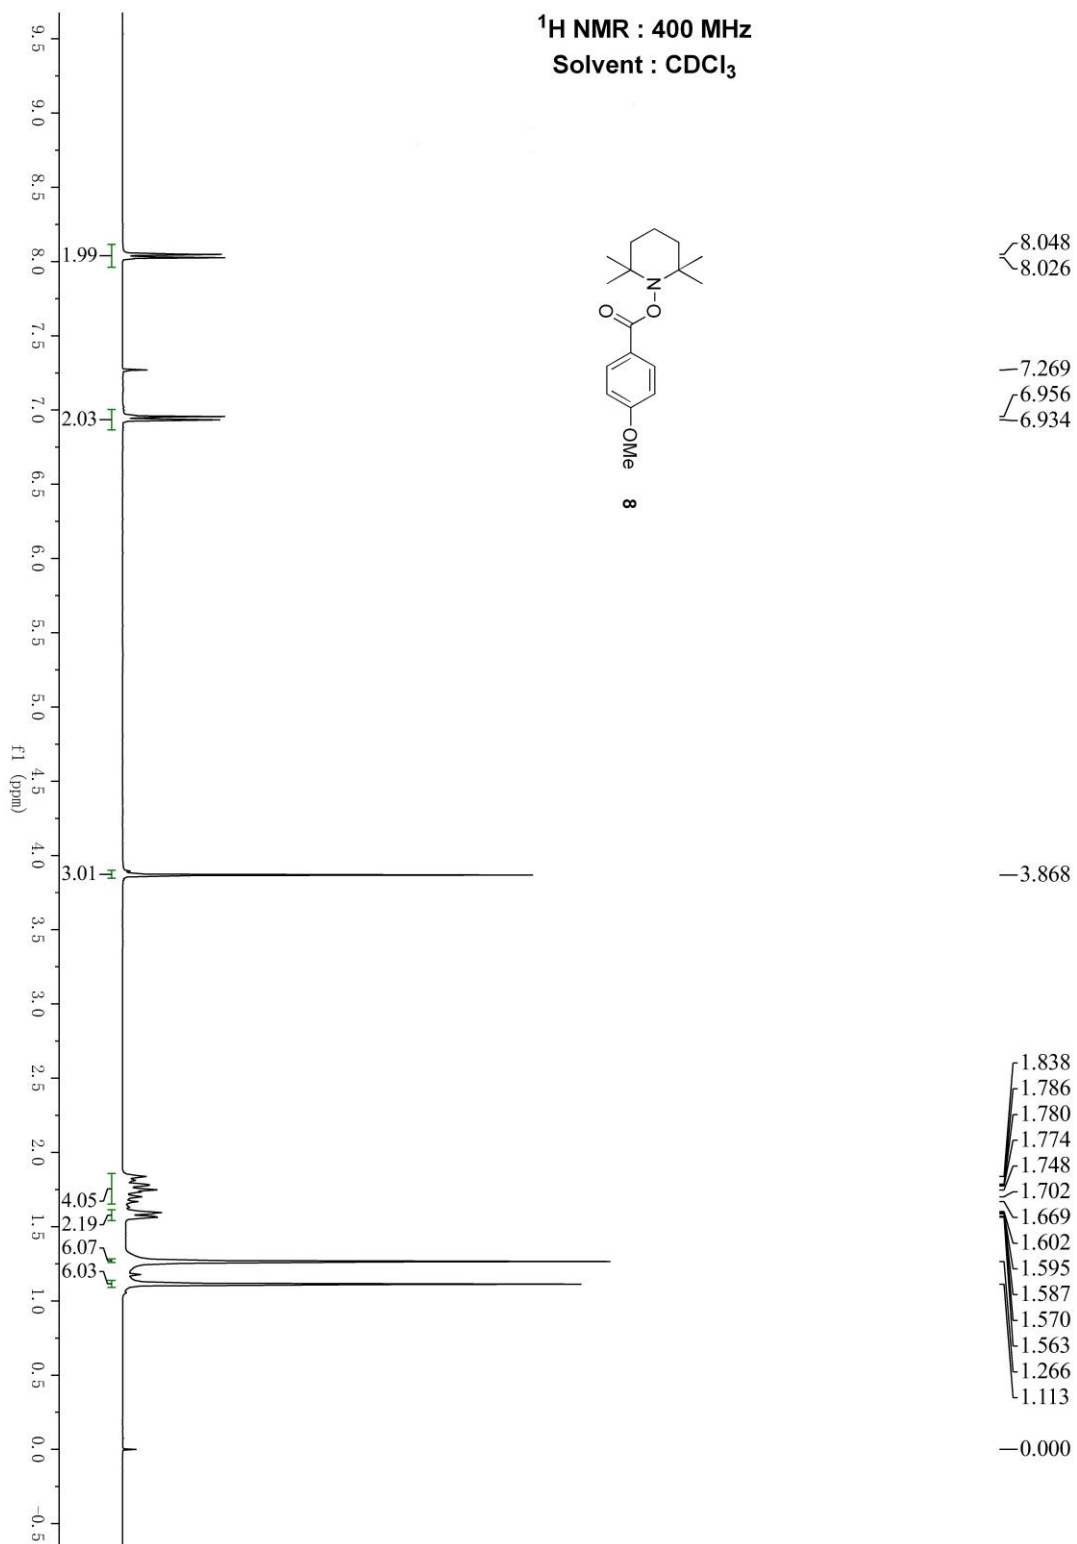

$^{13}\text{C} \{^1\text{H}\}$  NMR : 100 MHz  
Solvent :  $\text{CDCl}_3$

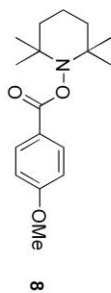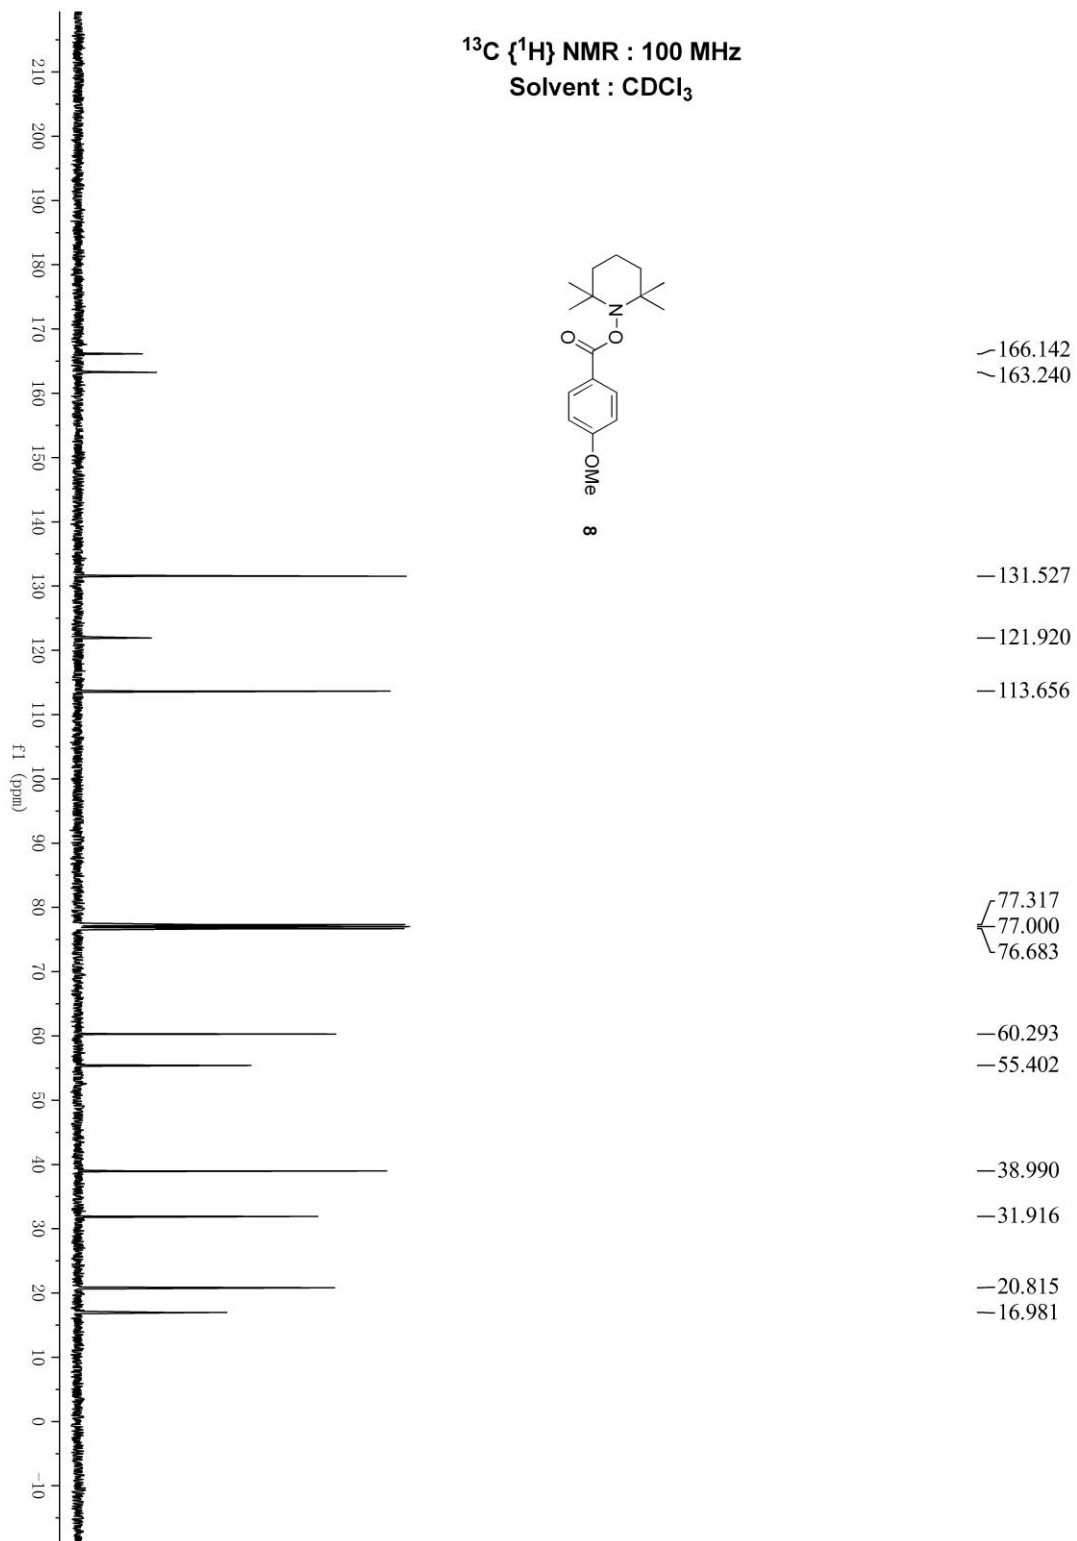

# 1-(4-Methoxyphenyl)-3,3-diphenylprop-2-en-1-one (10)

$^1\text{H NMR}$  : 400 MHz

Solvent :  $\text{CDCl}_3$

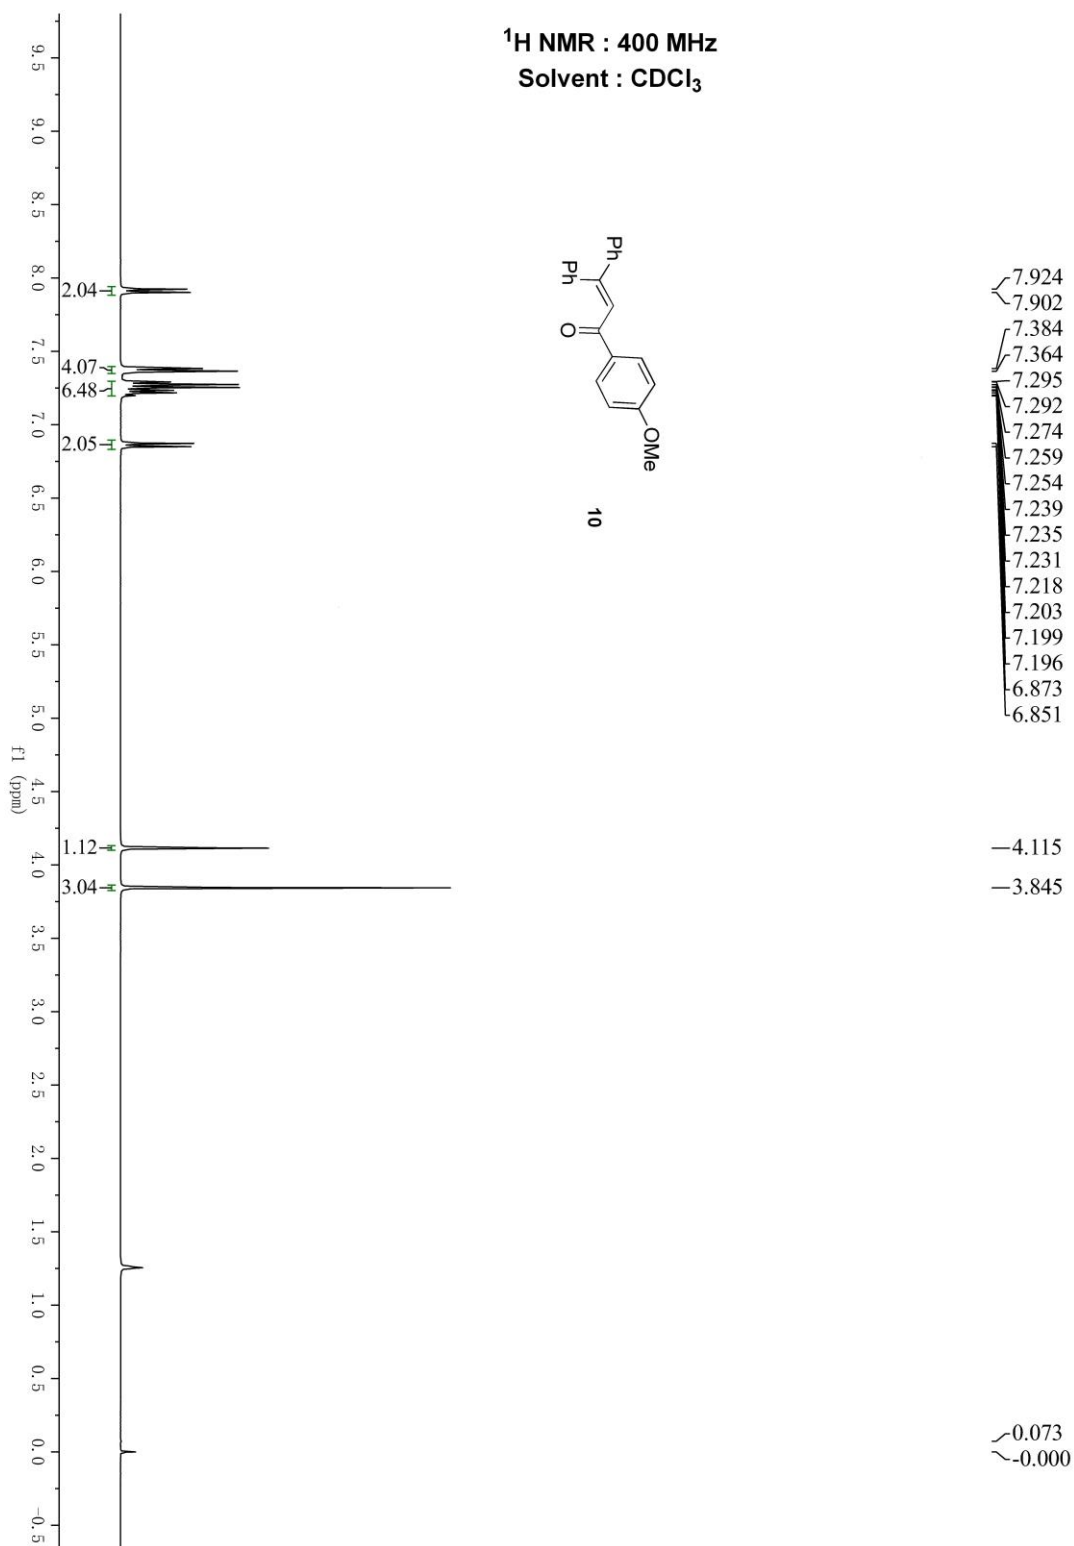

$^{13}\text{C}$   $\{^1\text{H}\}$  NMR : 100 MHz  
Solvent :  $\text{CDCl}_3$

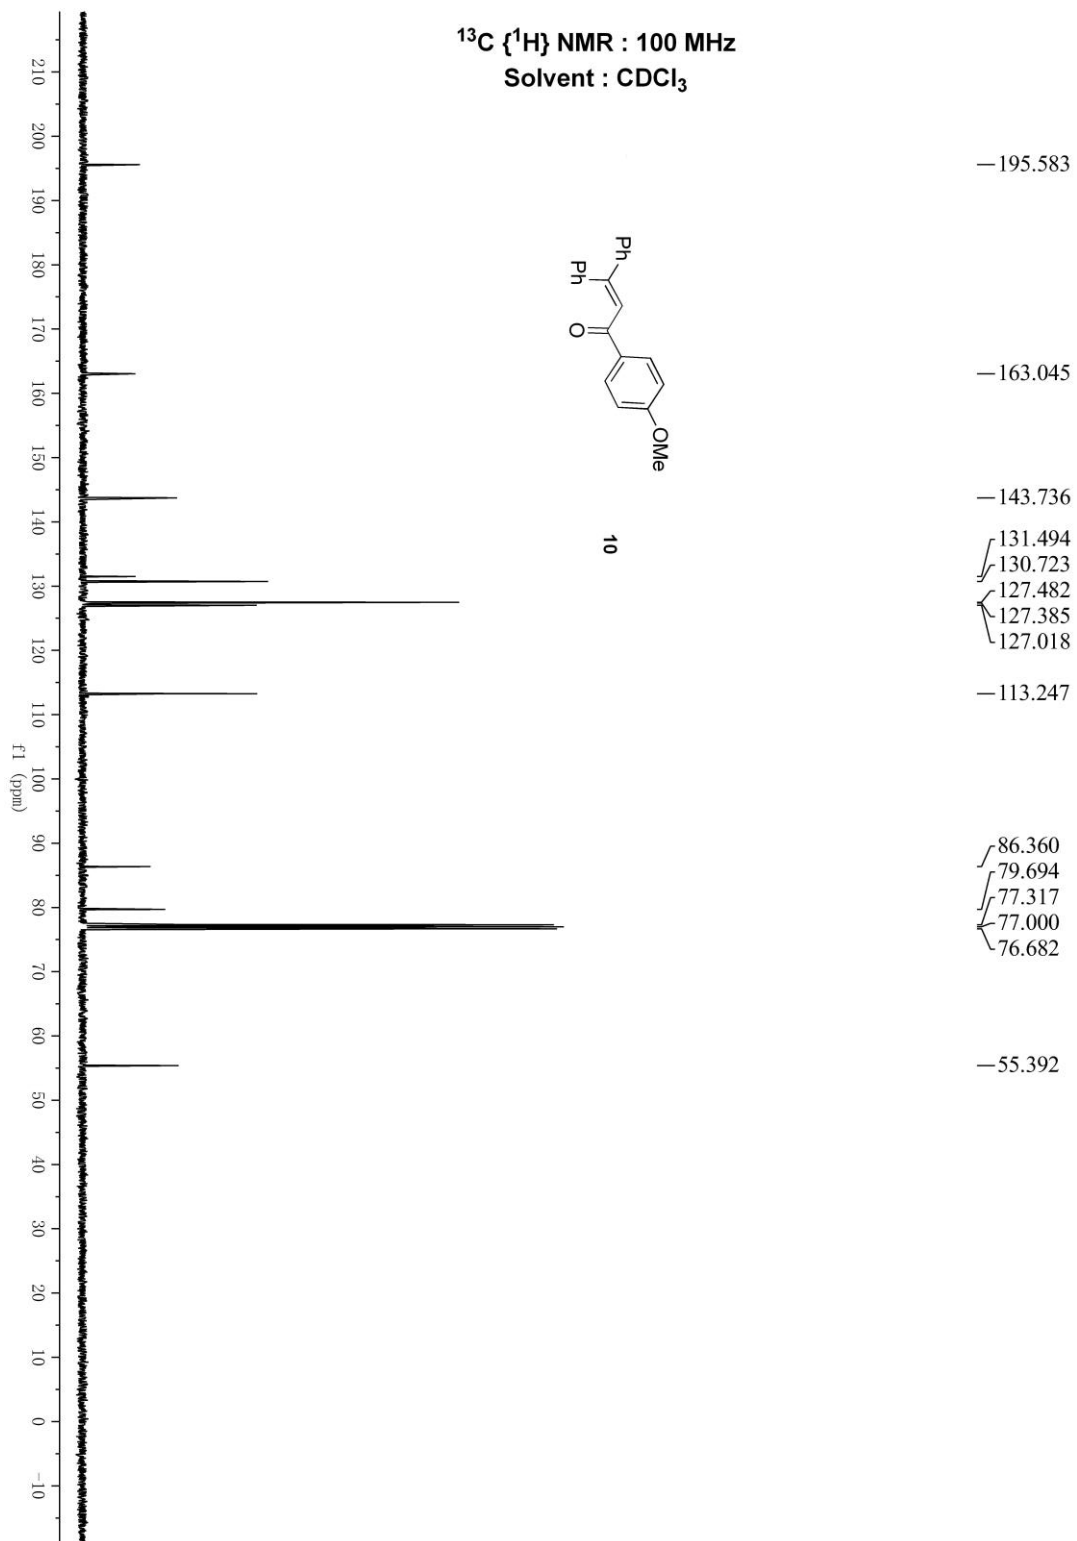

Supplement: d4cc00964a1.pdf [file d4cc00964a1.pdf]
